# Supplementary material
Source: publisher site journal article supplement (https://www.spandidos-publications.com/8319/downloadSupplementary)
Supplement: Supplementary file 1 [file downloadSupplementary]

## Sheet: Sheet 1
Table SI. Complete list of all gene expression data obtained from the RNA sequencing analysis of LT4-treated and control HCT116 cells.
Geneid	Symbol	Description	EntrezID	Counts_hct116_control_1(hct116_Control)	Counts_hct116_control_2(hct116_Control)	Counts_hct116_control_3(hct116_Control)	Counts_hct116_lt4_1(hct116_LT4_1)	Counts_hct116_lt4_2(hct116_LT4_2)	Counts_hct116_lt4_3(hct116_LT4_3)	TPM_hct116_control_1(hct116_Control)	TPM_hct116_control_2(hct116_Control)	TPM_hct116_control_3(hct116_Control)	TPM_hct116_lt4_1(hct116_LT4_1)	TPM_hct116_lt4_2(hct116_LT4_2)	TPM_hct116_lt4_3(hct116_LT4_3)	log2FC_hct116_LT4_1_hct116_Control	log2FC_hct116_LT4_2_hct116_Control	log2FC_hct116_LT4_3_hct116_Control	padj_hct116_LT4_1_hct116_Control	padj_hct116_LT4_2_hct116_Control	padj_hct116_LT4_3_hct116_Control	pvalue_hct116_LT4_1_hct116_Control	pvalue_hct116_LT4_2_hct116_Control	pvalue_hct116_LT4_3_hct116_Control
ENSG00000000003	TSPAN6	tetraspanin 6	7105	438	482	448	302	308	63	21.2531	23.9124	21.8835	19.003	14.8756	14.8106	-0.358218	-0.470655	-0.516714	0.295179	0.0668207	0.235533	0.0682002	0.0156718	0.0394915
ENSG00000000005	TNMD	tenomodulin	64102	0	0	0	0	0	0	0	0	0	0	0	0
ENSG00000000419	DPM1	dolichyl-phosphate mannosyltransferase subunit 1, catalytic	8813	94	71	119	73	98	18	17.1413	13.2373	21.845	17.2625	17.7876	15.9027	-0.136073	0.14757	-0.0535469	0.880251	0.734875	1	0.65128	0.545388	0.994382
ENSG00000000457	SCYL3	SCY1 like pseudokinase 3	57147	52	40	55	50	46	11	1.66283	1.30777	1.77051	2.07339	1.46412	1.7042	0.267387	0.00686349	0.185585	0.71233	1	0.919491	0.396199	1	0.714218
ENSG00000000460	FIRRM	FIGNL1 interacting regulator of recombination and mitosis	55732	107	109	96	65	99	12	3.94486	4.10867	3.56295	3.10761	3.63294	2.14345	-0.439625	0.0258316	-0.773602	0.349958	0.993522	0.34379	0.0947157	0.936025	0.0840017
ENSG00000000938	FGR	FGR proto-oncogene, Src family tyrosine kinase	2268	0	0	0	0	0	0	0	0	0	0	0	0
ENSG00000000971	CFH	complement factor H	3075	0	0	0	0	0	0	0	0	0	0	0	0
ENSG00000001036	FUCA2	alpha-L-fucosidase 2	2519	1295	1139	1095	871	920	196	101.003	90.8271	85.9745	88.0945	71.4214	74.0636	-0.19391	-0.255801	-0.243186	0.609481	0.325676	0.56617	0.284331	0.155724	0.232729
ENSG00000001084	GCLC	glutamate-cysteine ligase catalytic subunit	2729	276	214	249	293	187	72	7.04895	5.58799	6.40185	9.70396	4.75371	8.90906	0.490338	-0.297993	0.567958	0.102592	0.332574	0.180456	0.0104853	0.161205	0.0231447
ENSG00000001167	NFYA	nuclear transcription factor Y subunit alpha	4800	323	301	242	280	232	77	18.6546	17.7736	14.0698	20.9704	13.3366	21.5456	0.195123	-0.216852	0.435036	0.638357	0.49198	0.321147	0.314127	0.289606	0.0743551
ENSG00000001460	STPG1	sperm tail PG-rich repeat containing 1	90529	117	116	125	131	130	26	3.02571	3.06709	3.25418	4.39318	3.34626	3.25761	0.371734	0.21996	0.141462	0.360144	0.5252	0.914644	0.0995835	0.317856	0.706662
ENSG00000001461	NIPAL3	NIPA like domain containing 3	57185	221	198	184	204	176	47	5.17692	4.7421	4.33897	6.19691	4.10362	5.3341	0.260352	-0.0932853	0.245025	0.519187	0.838845	0.724287	0.202472	0.68458	0.395914
ENSG00000001497	LAS1L	LAS1 like ribosome biogenesis factor	81887	1318	1332	1136	1065	1062	239	51.9043	53.6313	45.0357	54.388	41.6282	45.6005	-0.00716711	-0.15208	-0.0604	1	0.606461	0.949751	0.986768	0.399163	0.776898
ENSG00000001561	ENPP4	ectonucleotide pyrophosphatase/phosphodiesterase 4	22875	40	31	44	49	29	9	1.89579	1.50217	2.09929	3.01156	1.36805	2.0666	0.591231	-0.303592	0.249686	0.257368	0.665981	0.876661	0.0515601	0.464273	0.637477
ENSG00000001617	SEMA3F	semaphorin 3F	6405	372	330	323	239	242	35	16.9659	15.3878	14.8295	14.1351	10.9856	7.73369	-0.276258	-0.399065	-0.944815	0.476719	0.147391	0.0326486	0.172177	0.0483723	0.00126712
ENSG00000001626	CFTR	CF transmembrane conductance regulator	1080	0	0	0	0	0	0	0	0	0	0	0	0
ENSG00000001629	ANKIB1	ankyrin repeat and IBR domain containing 1	54467	75	54	68	71	37	14	2.23407	1.64459	2.03909	2.74259	1.09702	2.02045	0.351789	-0.726913	0.112289	0.484806	0.0776736	0.98081	0.177406	0.0193432	0.839539
ENSG00000001630	CYP51A1	cytochrome P450 family 51 subfamily A member 1	1595	37	47	13	48	17	9	2.30766	2.99706	0.816214	3.8822	1.05535	2.71955	0.805384	-0.826109	0.493336	0.112407	0.152921	0.751638	0.0121343	0.0512385	0.440721
ENSG00000001631	KRIT1	KRIT1 ankyrin repeat containing	889	17	9	19	15	31	3	0.603114	0.326452	0.678569	0.690093	1.09468	0.515651	0.237091	1.13877	0.0193882	0.882344	0.0257889	1	0.658914	0.00411209	1
ENSG00000002016	RAD52	RAD52 homolog, DNA repair protein	5893	113	78	90	121	113	19	5.5233	3.89799	4.42846	7.66957	5.49761	4.49943	0.609468	0.370172	0.0416855	0.0839345	0.250793	1	0.00731012	0.105015	0.914816
ENSG00000002079	MYH16	myosin heavy chain 16 (pseudogene)	84176	30	15	6	15	13	4	1.04694	0.535201	0.210786	0.678823	0.451563	0.676306	0.0598702	-0.284632	0.25382	1	0.854114	0.954581	0.976521	0.706684	0.78745
ENSG00000002330	BAD	BCL2 associated agonist of cell death	572	908	850	936	726	1052	173	117.009	111.99	121.423	121.321	134.935	108.01	-0.0688456	0.325338	-0.0355159	0.913061	0.165391	0.998488	0.72008	0.0572885	0.886637
ENSG00000002549	LAP3	leucine aminopeptidase 3	51056	290	287	263	212	280	66	16.8637	17.0634	15.3958	15.9867	16.2065	18.5945	-0.163418	0.0969628	0.255376	0.745619	0.792659	0.648293	0.434583	0.622214	0.308957
ENSG00000002586	CD99	CD99 molecule (Xg blood group)	4267	548	578	640	369	875	100	24.8282	26.7743	29.19	21.6799	39.4592	21.9507	-0.437669	0.666907	-0.218808	0.162456	0.00160345	0.679473	0.0226484	0.000108825	0.346579
ENSG00000002587	HS3ST1	heparan sulfate-glucosamine 3-sulfotransferase 1	9957	1054	1077	1076	1061	955	199	31.2019	32.5974	32.0659	40.7307	28.1397	28.5416	0.225991	-0.066686	-0.0860237	0.496582	0.864371	0.901959	0.185729	0.722734	0.68474
ENSG00000002726	AOC1	amine oxidase copper containing 1	26	15	12	11	7	14	2	0.863367	0.706174	0.637363	0.522478	0.802061	0.557722	-0.609129	0.239996	-0.31736	0.726865	0.802578	1	0.414997	0.633699	1
ENSG00000002745	WNT16	Wnt family member 16	51384	13	11	6	21	6	1	0.876628	0.758387	0.407299	1.83636	0.402716	0.326705	1.29804	-0.629032	-0.959193	0.0815262	0.613299	0.944603	0.00688371	0.405875	0.767129
ENSG00000002746	HECW1	HECT, C2 and WW domain containing E3 ubiquitin protein ligase 1	23072	87	70	47	76	45	11	1.37415	1.13042	0.747314	1.55666	0.707462	0.841767	0.400149	-0.49501	-0.284423	0.412162	0.260711	0.869359	0.131014	0.111494	0.623825
ENSG00000002822	MAD1L1	mitotic arrest deficient 1 like 1	8379	4	11	5	5	5	4	0.121771	0.342376	0.15323	0.197387	0.151506	0.589967	-0.174194	-0.312014	1.58046	1	0.893065	0.354481	1	0.767129	0.0905737
ENSG00000002834	LASP1	LIM and SH3 protein 1	3927	8702	8230	6859	8441	4799	1369	271.253	262.29	215.232	341.205	148.896	206.749	0.329043	-0.626478	-0.192708	0.237108	0.00394878	0.610539	0.0438262	0.000356102	0.274775
ENSG00000002919	SNX11	sorting nexin 11	29916	494	493	399	404	468	85	30.1525	30.7659	24.5166	31.9774	28.4327	25.1362	0.0445987	0.115875	-0.101643	0.956147	0.715538	0.909069	0.805686	0.519507	0.698443
ENSG00000002933	TMEM176A	transmembrane protein 176A	55365	0	0	0	2	0	0	0	0	0	0.164177	0	0
ENSG00000003056	M6PR	mannose-6-phosphate receptor, cation dependent	4074	855	724	675	658	327	149	52.4927	45.4462	41.7183	52.3871	19.9828	44.3203	0.0489855	-1.10038	0.00874789	0.942523	1.54045e-06	1	0.777534	2.09921e-08	0.955243
ENSG00000003096	KLHL13	kelch like family member 13	90293	60	58	59	33	18	14	1.89117	1.86911	1.87207	1.34884	0.564713	2.13792	-0.598575	-1.60915	0.264641	0.301128	0.000246403	0.824474	0.0705271	1.01187e-05	0.557195
ENSG00000003137	CYP26B1	cytochrome P450 family 26 subfamily B member 1	56603	248	245	209	192	120	15	10.8844	10.9937	9.23395	10.9274	5.24213	3.18953	-0.0472341	-0.865547	-1.6208	0.968645	0.00166306	0.00117488	0.835739	0.000114241	1.15369e-05
ENSG00000003147	ICA1	islet cell autoantigen 1	3382	80	58	60	55	115	10	3.606	2.67294	2.72256	3.21487	5.15951	2.18383	-0.0227775	0.899159	-0.378695	1	0.00223909	0.778879	0.994382	0.000167521	0.486526
ENSG00000003249	DBNDD1	dysbindin domain containing 1	79007	1897	1932	1513	1548	1108	258	87.1492	90.7464	69.9721	92.2216	50.6654	57.4248	0.035872	-0.58738	-0.446511	0.962157	0.00919968	0.174884	0.821456	0.00107176	0.0216803
ENSG00000003393	ALS2	alsin Rho guanine nucleotide exchange factor ALS2	57679	205	196	180	204	119	55	4.32273	4.22559	3.82092	5.57829	2.49762	5.6189	0.313138	-0.604646	0.524438	0.400068	0.0416405	0.270339	0.123525	0.00800265	0.0518326
ENSG00000003400	CASP10	caspase 10	843	37	40	52	32	35	4	1.07183	1.1847	1.51641	1.20209	1.00917	0.561393	-0.188547	-0.200097	-1.08077	0.853547	0.78301	0.462708	0.600814	0.606846	0.15395
ENSG00000003402	CFLAR	CASP8 and FADD like apoptosis regulator	8837	220	192	159	229	209	47	2.15411	1.92209	1.56723	2.90768	2.03689	2.2296	0.50637	0.233814	0.324339	0.106519	0.436016	0.592677	0.0110717	0.240784	0.257738
ENSG00000003436	TFPI	tissue factor pathway inhibitor	7035	13	21	20	9	15	4	0.244264	0.403425	0.378301	0.219293	0.280533	0.364134	-0.755958	-0.165795	0.168086	0.461674	0.954006	1	0.162245	0.869568	0.912337
ENSG00000003509	NDUFAF7	NADH:ubiquinone oxidoreductase complex assembly factor 7	55471	71	54	56	53	77	12	4.28024	3.32836	3.39851	4.14335	4.62037	3.5049	0.0526676	0.449972	0.0123209	0.979769	0.207534	1	0.86388	0.0795755	0.950938
ENSG00000003756	RBM5	RNA binding motif protein 5	10181	501	534	474	463	521	110	10.647	11.6026	10.1404	12.7595	11.0205	11.3257	0.117194	0.1466	0.146202	0.799785	0.618661	0.787271	0.511268	0.411242	0.498289
ENSG00000003987	MTMR7	myotubularin related protein 7	9108	0	1	0	0	0	0	0	0.0324818	0	0	0	0
ENSG00000003989	SLC7A2	solute carrier family 7 member 2	6542	69	47	67	55	36	2	1.92119	1.33796	1.87796	1.98586	0.997696	0.269795	0.0901942	-0.660166	-2.57005	0.940666	0.120133	0.035105	0.773835	0.0361442	0.00140192
ENSG00000004059	ARF5	ADP ribosylation factor 5	381	2799	2870	2857	2131	2204	469	337.569	353.889	346.864	333.279	264.573	274.041	-0.178637	-0.270897	-0.25997	0.633258	0.276375	0.473106	0.308945	0.121792	0.159972
ENSG00000004139	SARM1	sterile alpha and TIR motif containing 1	23098	14	9	11	6	8	2	0.27748	0.182378	0.219476	0.154213	0.157822	0.192051	-0.66884	-0.399285	-0.158745	0.705185	0.751565	1	0.388723	0.563573	1
ENSG00000004142	POLDIP2	DNA polymerase delta interacting protein 2	26073	2575	2585	2268	1975	2202	406	212.27	217.87	188.211	211.127	180.677	162.151	-0.088485	-0.0723829	-0.268241	0.862625	0.840925	0.457906	0.621256	0.688147	0.151463
ENSG00000004399	PLXND1	plexin D1	23129	676	661	549	581	442	65	15.2791	15.275	12.4915	17.0292	9.94374	7.11786	0.1246	-0.41063	-0.932544	0.779626	0.103515	0.00759441	0.4809	0.029298	0.000138115
ENSG00000004455	AK2	adenylate kinase 2	204	2712	2904	2592	2186	2547	550	62.017	67.896	59.6687	64.8242	57.973	60.9352	-0.0873414	-0.00769843	0.0243942	0.864952	1	0.994675	0.624897	0.981046	0.877394
ENSG00000004468	CD38	CD38 molecule	952	1	0	0	0	0	0	0.0320987	0	0	0	0	0
ENSG00000004478	FKBP4	FKBP prolyl isomerase 4	2288	9138	8626	8135	6442	6986	1299	389.557	375.972	349.114	356.128	296.431	268.295	-0.183879	-0.20778	-0.39145	0.612943	0.420458	0.192817	0.287481	0.228826	0.0267928
ENSG00000004487	KDM1A	lysine demethylase 1A	23028	2502	2682	2392	1651	2181	376	101.23	110.945	97.4259	86.6236	87.8323	73.7047	-0.376693	-0.115918	-0.40869	0.201205	0.709843	0.204929	0.0326876	0.512727	0.0295416
ENSG00000004534	RBM6	RNA binding motif protein 6	10180	464	500	453	419	363	108	13.9919	15.4154	13.7514	16.3847	10.8953	15.7785	0.0636733	-0.284065	0.210238	0.915325	0.304289	0.675053	0.72381	0.140315	0.342126
ENSG00000004660	CAMKK1	calcium/calmodulin dependent protein kinase kinase 1	84254	157	140	158	148	228	36	4.64898	4.2385	4.70983	5.6831	6.71998	5.16469	0.203004	0.685288	0.265919	0.667664	0.00640345	0.712049	0.348115	0.000671998	0.382081
ENSG00000004700	RECQL	RecQ like helicase	5965	83	59	81	83	59	25	4.83418	3.51337	4.7492	6.26887	3.42037	7.05455	0.398205	-0.234006	0.768908	0.391841	0.624647	0.242466	0.118207	0.417141	0.0414704
ENSG00000004766	VPS50	VPS50 subunit of EARP/GARPII complex	55610	26	9	21	15	22	3	0.598664	0.211874	0.486765	0.447885	0.504206	0.334668	-0.0747035	0.334411	-0.291916	1	0.666151	1	1	0.464837	0.900611
ENSG00000004776	HSPB6	heat shock protein family B (small) member 6	126393	6	8	7	3	13	0	0.766013	1.04424	0.899649	0.496675	1.65198	0	-0.959011	0.977282	-5.51651	0.797366	0.218078	0.479967	0.508194	0.0855559	0.16812
ENSG00000004777	ARHGAP33	Rho GTPase activating protein 33	115703	63	72	68	92	81	15	2.63619	3.08032	2.86441	4.99218	3.37362	3.04097	0.679067	0.354944	0.165604	0.0792906	0.346592	0.917018	0.0066049	0.171189	0.710092
ENSG00000004779	NDUFAB1	NADH:ubiquinone oxidoreductase subunit AB1	4706	734	777	733	512	861	139	104.363	112.953	104.917	94.4032	121.851	95.7524	-0.310273	0.298632	-0.0888418	0.350853	0.216479	0.906456	0.0951118	0.0845382	0.692831
ENSG00000004799	PDK4	pyruvate dehydrogenase kinase 4	5166	6	1	9	6	3	1	0.290626	0.0495234	0.43885	0.376878	0.144637	0.234675
ENSG00000004809	SLC22A16	solute carrier family 22 member 16	85413	0	0	2	0	0	0	0	0	0.113422	0	0	0
ENSG00000004838	ZMYND10	zinc finger MYND-type containing 10	51364	36	55	67	23	52	8	2.74269	4.28414	5.13854	2.27231	3.94324	2.9529	-0.956752	0.0757431	-0.379842	0.092331	0.916298	0.826648	0.0086634	0.805795	0.559934
ENSG00000004846	ABCB5	ATP binding cassette subfamily B member 5	340273	0	0	0	0	0	0	0	0	0	0	0	0
ENSG00000004848	ARX	aristaless related homeobox	170302	7	13	9	7	7	2	0.494768	0.939449	0.640378	0.641604	0.492467	0.684885	-0.225073	-0.363762	0.0657853	0.987028	0.777513	1	0.882325	0.598927	0.966321
ENSG00000004864	SLC25A13	solute carrier family 25 member 13	10165	318	295	311	198	164	45	18.8658	17.8936	18.5737	15.2328	9.68428	12.9344	-0.398989	-0.811396	-0.433898	0.264005	0.00184856	0.412951	0.0539889	0.000130029	0.122092
ENSG00000004866	ST7	suppression of tumorigenicity 7	7982	150	119	108	100	115	24	4.89694	3.97198	3.54934	4.2335	3.73686	3.79602	-0.0891007	-0.0283917	-0.0455007	0.919924	1	1	0.733112	0.946387	0.960631
ENSG00000004897	CDC27	cell division cycle 27	996	472	387	510	489	338	86	15.2239	12.7621	16.5594	20.453	10.8511	13.439	0.338743	-0.334735	-0.0660421	0.278092	0.21776	0.967485	0.0604957	0.0853439	0.811059
ENSG00000004939	SLC4A1	solute carrier family 4 member 1 (Diego blood group)	6521	1	0	0	0	0	0	0.0429465	0	0	0	0	0
ENSG00000004948	CALCR	calcitonin receptor	799	2	0	0	2	0	0	0.104141	0	0	0.135047	0	0
ENSG00000004961	HCCS	holocytochrome c synthase	3052	219	262	220	194	271	55	20.5728	25.1639	20.8048	23.6329	25.3393	25.0321	-0.0326964	0.308512	0.251109	1	0.258662	0.671725	0.912829	0.110152	0.338391
ENSG00000004975	DVL2	dishevelled segment polarity protein 2	1856	880	828	839	939	718	158	36.4008	35.0175	34.9366	50.3686	29.5616	31.6643	0.383498	-0.144428	-0.0851037	0.175234	0.638225	0.909037	0.0256237	0.43222	0.69796
ENSG00000005001	PRSS22	serine protease 22	64063	72	99	60	60	76	11	6.64735	9.34496	5.57644	7.18345	6.98401	4.92031	-0.123671	0.076167	-0.467697	0.899803	0.906047	0.698095	0.692688	0.789659	0.365136
ENSG00000005007	UPF1	UPF1 RNA helicase and ATPase	5976	2037	1976	1687	2009	1470	281	52.1332	51.7055	43.4639	66.676	37.4469	34.8429	0.318875	-0.272605	-0.41637	0.268776	0.278237	0.209143	0.0558742	0.123283	0.0308475
ENSG00000005020	SKAP2	src kinase associated phosphoprotein 2	8935	63	55	84	84	67	24	2.58653	2.30869	3.47173	4.4722	2.73796	4.77388	0.556015	0.0896542	0.85059	0.19436	0.906873	0.192817	0.0307185	0.791166	0.0267841
ENSG00000005022	SLC25A5	solute carrier family 25 member 5	292	11772	11223	11224	8484	8322	1994	1666.26	1624.15	1599.3	1557.25	1172.45	1367.42	-0.189015	-0.357686	-0.175563	0.598185	0.125478	0.65561	0.273239	0.0384397	0.315937
ENSG00000005059	MCUB	mitochondrial calcium uniporter dominant negative subunit beta	55013	82	88	95	66	101	28	5.07687	5.57047	5.92102	5.29898	6.22414	8.39894	-0.183256	0.289039	0.680989	0.803717	0.427353	0.272724	0.517769	0.234231	0.0534415
ENSG00000005073	HOXA11	homeobox A11	3207	165	146	153	126	132	28	15.7419	14.2414	14.6945	15.5887	12.535	12.9424	-0.0568775	-0.130558	-0.124189	0.974554	0.76977	0.944032	0.847023	0.588306	0.760784
ENSG00000005075	POLR2J	RNA polymerase II subunit J	5439	700	723	614	447	1012	130	113.705	120.074	100.402	94.1578	163.621	102.308	-0.365675	0.672149	-0.0449762	0.259577	0.00128758	0.991417	0.0523602	8.21403e-05	0.862802
ENSG00000005100	DHX33	DEAH-box helicase 33	56919	493	368	411	415	384	110	18.7441	14.3052	15.7308	20.4613	14.532	20.2626	0.210332	-0.042459	0.397187	0.573306	0.944653	0.320191	0.249306	0.850566	0.0739627
ENSG00000005102	MEOX1	mesenchyme homeobox 1	4222	8	5	1	2	0	0	0.658492	0.420782	0.0828611	0.21348	0	0
ENSG00000005108	THSD7A	thrombospondin type 1 domain containing 7A	221981	0	0	0	0	0	0	0	0	0	0	0	0
ENSG00000005156	LIG3	DNA ligase 3	3980	616	572	453	591	375	104	10.5094	9.97749	7.78014	13.0753	6.36803	8.59639	0.350965	-0.445966	-0.0529888	0.244771	0.0796424	0.97952	0.0467013	0.0200941	0.835539
ENSG00000005175	RPAP3	RNA polymerase II associated protein 3	79657	115	74	92	93	88	21	4.73114	3.11262	3.81019	4.96155	3.60352	4.18573	0.230582	0.0102781	0.186276	0.663659	1	0.877084	0.343666	0.949008	0.638304
ENSG00000005187	ACSM3	acyl-CoA synthetase medium chain family member 3	6296	27	23	23	12	23	6	0.791309	0.689186	0.678579	0.456068	0.670943	0.851956	-0.77576	0.0163975	0.319433	0.404772	1	0.873408	0.125917	1	0.631614
ENSG00000005189	REXO5	RNA exonuclease 5	81691	53	67	61	43	58	10	2.83553	3.66487	3.28532	2.98327	3.0886	2.59204	-0.251639	0.0385472	-0.253319	0.751366	0.979015	0.900826	0.443843	0.912374	0.681727
ENSG00000005194	CIAPIN1	cytokine induced apoptosis inhibitor 1	57019	1194	1183	1204	840	979	223	77.6827	78.6921	78.8564	70.8704	63.3984	70.2925	-0.269624	-0.189574	-0.0804603	0.419268	0.495852	0.912216	0.135576	0.292954	0.703019
ENSG00000005206	SPPL2B	signal peptide peptidase like 2B	56928	316	310	307	278	436	52	9.37484	9.40297	9.16865	10.6952	12.8747	7.47419	0.0758362	0.584055	-0.239972	0.902596	0.0110284	0.711835	0.697201	0.00136289	0.381511
ENSG00000005238	ATOSB	atos homolog B	80256	194	163	181	166	199	35	6.66244	5.72329	6.2575	7.39274	6.80237	5.8235	0.127718	0.248371	-0.0154055	0.817232	0.414792	1	0.538616	0.224298	1
ENSG00000005243	COPZ2	COPI coat complex subunit zeta 2	51226	1	0	1	0	0	0	0.117953	0	0.118741	0	0	0
ENSG00000005249	PRKAR2B	protein kinase cAMP-dependent type II regulatory subunit beta	5577	41	30	29	42	23	11	2.11735	1.584	1.50764	2.8127	1.18226	2.75223	0.571139	-0.434699	0.739909	0.32723	0.470278	0.519248	0.0820547	0.269214	0.193848
ENSG00000005302	MSL3	MSL complex subunit 3	10943	70	84	73	44	62	19	1.57537	1.93281	1.65385	1.28411	1.38883	2.07167	-0.544427	-0.191313	0.344832	0.285886	0.691697	0.712049	0.0631355	0.491617	0.382138
ENSG00000005339	CREBBP	CREB binding protein	1387	728	690	634	787	480	144	10.343	10.0228	9.06764	14.4996	6.78783	9.91199	0.440788	-0.413239	0.0930761	0.106205	0.0982465	0.884746	0.0110178	0.0272955	0.651651
ENSG00000005379	TSPOAP1	TSPO associated protein 1	9256	0	1	0	0	0	0	0	0.0197589	0	0	0	0
ENSG00000005381	MPO	myeloperoxidase	4353	0	0	0	0	0	0	0	0	0	0	0	0
ENSG00000005421	PON1	paraoxonase 1	5444	1	0	2	0	0	0	0.0828382	0	0.166783	0	0	0
ENSG00000005436	GCFC2	GC-rich sequence DNA-binding factor 2	6936	33	13	34	34	27	17	1.32979	0.5356	1.37924	1.7767	1.08295	3.31897	0.58829	0.116676	1.68735	0.347453	0.927135	0.0175901	0.0935279	0.823013	0.000493159
ENSG00000005448	WDR54	WD repeat domain 54	84058	1096	1156	1129	728	1177	161	84.3464	90.9579	87.4662	72.6529	90.1588	60.0297	-0.394013	0.158163	-0.468336	0.194084	0.559417	0.182171	0.030623	0.351495	0.0237906
ENSG00000005469	CROT	carnitine O-octanoyltransferase	54677	0	1	0	0	0	0	0	0.0451967	0	0	0	0
ENSG00000005471	ABCB4	ATP binding cassette subfamily B member 4	5244	0	0	0	0	0	1	0	0	0	0	0	0.138005
ENSG00000005483	KMT2E	lysine methyltransferase 2E (inactive)	55904	123	87	80	123	68	21	2.72112	1.96783	1.78165	3.52869	1.49736	2.25085	0.588187	-0.406454	0.140954	0.100179	0.295596	0.912803	0.00997102	0.134419	0.704145
ENSG00000005486	RHBDD2	rhomboid domain containing 2	57414	1201	1178	1085	857	1132	172	110.603	110.916	100.588	102.346	103.764	76.7426	-0.192192	0.0684256	-0.406507	0.614015	0.836968	0.259086	0.288929	0.681819	0.0480444
ENSG00000005513	SOX8	SRY-box transcription factor 8	30812	137	126	111	83	121	11	6.74582	6.34325	5.50209	5.29979	5.93028	2.62417	-0.347626	0.0548742	-1.15888	0.454526	0.925218	0.104364	0.156984	0.819964	0.00865863
ENSG00000005700	IBTK	inhibitor of Bruton tyrosine kinase	25998	208	132	239	160	153	60	5.25072	3.40687	6.07356	5.23771	3.84434	7.33822	-0.0299667	-0.235218	0.657078	1	0.49182	0.133906	0.924923	0.289343	0.0135606
ENSG00000005801	ZNF195	zinc finger protein 195	7748	94	73	90	94	101	15	1.76667	1.40274	1.70279	2.29098	1.8894	1.36585	0.372813	0.335631	-0.171523	0.39871	0.332593	0.947445	0.122394	0.161342	0.772748
ENSG00000005810	MYCBP2	MYC binding protein 2	23077	229	188	183	218	161	67	3.15276	2.6463	2.53628	3.89204	2.20626	4.46904	0.364224	-0.213547	0.764405	0.294026	0.532086	0.0569369	0.0675833	0.324121	0.00298071
ENSG00000005812	FBXL3	F-box and leucine rich repeat protein 3	26224	72	50	76	63	36	15	2.23958	1.59012	2.37979	2.54121	1.11458	2.26053	0.172067	-0.773853	0.204077	0.824537	0.0597276	0.900254	0.55006	0.0132981	0.679321
ENSG00000005844	ITGAL	integrin subunit alpha L	3683	2	0	1	0	0	0	0.0686635	0	0.034561	0	0	0
ENSG00000005882	PDK2	pyruvate dehydrogenase kinase 2	5164	944	905	862	610	606	111	37.9776	37.2246	34.9102	31.8237	24.2663	21.6353	-0.328781	-0.479105	-0.684401	0.308969	0.0473185	0.0426723	0.0738352	0.00953325	0.00189999
ENSG00000005884	ITGA3	integrin subunit alpha 3	3675	5972	5750	4833	6926	5484	1056	134.099	132.008	109.248	201.677	122.569	114.883	0.566411	0.0887674	-0.0444582	0.0154857	0.76594	0.968431	0.00048203	0.583229	0.814206
ENSG00000005889	ZFX	zinc finger protein X-linked	7543	85	53	72	99	42	19	2.07022	1.31978	1.76531	3.12679	1.01818	2.242	0.739738	-0.635631	0.461034	0.0402893	0.109518	0.60474	0.00219613	0.0317361	0.268249
ENSG00000005893	LAMP2	lysosomal associated membrane protein 2	3920	235	183	170	226	116	43	9.36007	7.45227	6.81633	11.6731	4.5988	8.29781	0.446179	-0.656083	0.154933	0.169353	0.0231349	0.853342	0.0241877	0.00355137	0.600475
ENSG00000005961	ITGA2B	integrin subunit alpha 2b	3674	33	23	34	9	13	0	1.27539	0.90883	1.32281	0.451062	0.500089	0	-1.48664	-1.10127	-7.59055	0.0556353	0.0710271	0.0145707	0.00359009	0.0171376	0.000373757
ENSG00000005981	ASB4	ankyrin repeat and SOCS box containing 4	51666	2	3	1	0	1	0	0.0955714	0.14657	0.0481048	0	0.0475635	0
ENSG00000006007	GDE1	glycerophosphodiester phosphodiesterase 1	51573	932	735	865	519	918	147	46.7276	37.6766	43.658	33.7435	45.8116	35.7075	-0.460997	0.22079	-0.178432	0.117801	0.385335	0.732242	0.0131277	0.199669	0.410197
ENSG00000006015	REX1BD	required for excision 1-B domain containing	55049	633	700	712	567	1003	127	41.3424	46.743	46.8126	48.0221	65.2031	40.1865	-0.0301034	0.651835	-0.086078	0.991682	0.00191705	0.913658	0.89046	0.000136255	0.70511
ENSG00000006016	CRLF1	cytokine receptor like factor 1	9244	572	653	618	417	597	75	42.4327	49.5272	46.1512	40.115	44.0813	26.9556	-0.32348	0.0532579	-0.695883	0.338314	0.885224	0.0642297	0.0886351	0.755782	0.00368711
ENSG00000006025	OSBPL7	oxysterol binding protein like 7	114881	183	132	162	179	194	31	6.1288	4.51986	5.46172	7.77398	6.46698	5.03003	0.411282	0.386542	-0.0154975	0.243542	0.169551	1	0.0461543	0.0593939	1
ENSG00000006042	TMEM98	transmembrane protein 98	26022	208	242	251	165	180	43	8.82611	10.499	10.7219	9.07937	7.60245	8.84012	-0.26638	-0.281701	-0.103997	0.531078	0.37242	0.938208	0.214292	0.190618	0.750925
ENSG00000006047	YBX2	Y-box binding protein 2	51087	15	14	15	8	4	0	0.712916	0.680302	0.717677	0.493064	0.189227	0	-0.629226	-1.74732	-6.5667	0.647935	0.0537623	0.150844	0.321965	0.0113959	0.0167686
ENSG00000006059	KRT33A	keratin 33A	3883	0	2	0	0	0	0	0	0.345409	0	0	0	0
ENSG00000006062	MAP3K14	mitogen-activated protein kinase kinase kinase 14	9020	170	161	141	187	196	42	6.60148	6.39212	5.5119	9.41672	7.57572	7.90179	0.487455	0.414463	0.435378	0.147986	0.137429	0.44924	0.0191482	0.0436889	0.146837
ENSG00000006071	ABCC8	ATP binding cassette subfamily C member 8	6833	1	1	2	0	0	0	0.017485	0.0178769	0.0352035	0	0	0
ENSG00000006116	CACNG3	calcium voltage-gated channel auxiliary subunit gamma 3	10368	0	0	0	0	0	0	0	0	0	0	0	0
ENSG00000006118	TMEM132A	transmembrane protein 132A	54972	1995	1894	1845	1484	1814	253	60.3908	58.6185	56.2231	58.2543	54.6563	37.105	-0.126869	0.0219455	-0.57657	0.778002	0.962367	0.0593798	0.477465	0.884596	0.00319305
ENSG00000006125	AP2B1	adaptor related protein complex 2 subunit beta 1	163	4876	4235	3935	3790	3670	720	141.38	125.546	114.857	142.504	105.917	101.144	0.0417345	-0.145536	-0.251852	0.947637	0.611682	0.475102	0.790204	0.404274	0.162715
ENSG00000006128	TAC1	tachykinin precursor 1	6863	0	0	0	0	0	0	0	0	0	0	0	0
ENSG00000006194	ZNF263	zinc finger protein 263	10127	639	622	569	470	560	99	21.9654	21.8603	19.6898	20.9509	19.1603	16.4876	-0.138046	-0.0261638	-0.282626	0.770981	0.976805	0.555255	0.46735	0.90829	0.22191
ENSG00000006210	CX3CL1	C-X3-C motif chemokine ligand 1	6376	1	0	0	0	2	0	0.0369297	0	0	0	0.0735159	0
ENSG00000006282	SPATA20	spermatogenesis associated 20	64847	541	575	518	525	533	106	22.3112	24.2448	21.5053	28.077	21.879	21.1795	0.183643	0.0646288	-0.0220315	0.626167	0.862443	1	0.301121	0.719278	0.953541
ENSG00000006283	CACNA1G	calcium voltage-gated channel subunit alpha1 G	8913	58	55	55	57	43	11	1.26872	1.23006	1.21113	1.61688	0.936228	1.16577	0.263185	-0.283031	-0.00716419	0.689118	0.577457	1	0.369349	0.368307	1
ENSG00000006327	TNFRSF12A	TNF receptor superfamily member 12A	51330	1235	1198	1064	1557	1482	267	147.091	145.883	127.571	240.478	175.689	154.069	0.6558	0.443735	0.214505	0.00511898	0.0429735	0.588402	8.51454e-05	0.00835284	0.253537
ENSG00000006377	DLX6	distal-less homeobox 6	1750	0	0	0	0	0	0	0	0	0	0	0	0
ENSG00000006432	MAP3K9	mitogen-activated protein kinase kinase kinase 9	4293	319	283	242	329	195	40	5.66868	5.14167	4.32909	7.58146	3.44906	3.44378	0.465298	-0.429764	-0.471692	0.119003	0.123244	0.395605	0.0133862	0.0375001	0.111018
ENSG00000006451	RALA	RAS like proto-oncogene A	5898	204	192	264	175	305	54	12.5456	12.0722	16.3439	13.9561	18.6696	16.0893	-0.0930111	0.567257	0.31294	0.891965	0.0207714	0.569185	0.676511	0.00306336	0.237978
ENSG00000006453	BAIAP2L1	BAR/IMD domain containing adaptor protein 2 like 1	55971	756	705	730	578	889	137	34.5149	32.9079	33.5504	34.2199	40.3982	30.3033	-0.0992268	0.380952	-0.0735914	0.853144	0.0983081	0.941437	0.598573	0.0273713	0.756661
ENSG00000006459	KDM7A	lysine demethylase 7A	80853	41	14	28	38	29	2	0.962267	0.335944	0.661546	1.15654	0.677462	0.227419	0.696674	0.167739	-1.43217	0.240584	0.861648	0.473235	0.0450793	0.717872	0.160477
ENSG00000006468	ETV1	ETS variant transcription factor 1	2115	24	27	48	20	26	9	0.549394	0.631921	1.10613	0.593702	0.592409	0.998158	-0.483435	-0.247006	0.462958	0.582963	0.706483	0.7738	0.258834	0.507647	0.475059
ENSG00000006530	AGK	acylglycerol kinase	55750	226	216	229	233	174	51	4.65017	4.54402	4.74336	6.21701	3.56357	5.0841	0.296669	-0.265111	0.20746	0.418888	0.402711	0.752409	0.135096	0.214495	0.441695
ENSG00000006534	ALDH3B1	aldehyde dehydrogenase 3 family member B1	221	739	739	547	626	559	108	24.5479	25.0981	18.2915	26.9656	18.4824	17.3811	0.129691	-0.174423	-0.302807	0.764783	0.55958	0.492452	0.459278	0.351634	0.177425
ENSG00000006555	TTC22	tetratricopeptide repeat domain 22	55001	3	4	6	4	4	0	0.108052	0.147298	0.217546	0.186825	0.143399	0
ENSG00000006576	PHTF2	putative homeodomain transcription factor 2	57157	56	33	49	48	21	19	1.42559	0.858909	1.25572	1.58458	0.53211	2.34339	0.300927	-1.02766	1.06463	0.649244	0.0303651	0.139763	0.32666	0.0051643	0.0144241
ENSG00000006606	CCL26	C-C motif chemokine ligand 26	10344	50	63	51	21	66	8	15.5879	20.081	16.0058	8.4899	20.4803	12.0835	-1.13947	0.366867	-0.431946	0.0383763	0.367382	0.76375	0.00205597	0.186759	0.455919
ENSG00000006607	FARP2	FERM, ARH/RhoGEF and pleckstrin domain protein 2	9855	233	213	194	186	164	31	3.56854	3.33535	2.99107	3.69414	2.50008	2.30028	0.0411208	-0.281135	-0.440908	0.978109	0.38461	0.485165	0.857168	0.199085	0.173227
ENSG00000006611	USH1C	USH1 protein network component harmonin	10083	108	155	138	94	119	19	4.84725	7.11262	6.23506	5.47098	5.31611	4.13151	-0.273386	-0.074235	-0.477148	0.596297	0.89237	0.568978	0.270671	0.76535	0.237673
ENSG00000006625	GGCT	gamma-glutamylcyclotransferase	79017	187	134	229	114	349	45	25.8211	18.9176	31.8317	20.4129	47.9661	30.1044	-0.445705	1.02675	0.315177	0.263408	3.2946e-06	0.608436	0.0537683	5.23791e-08	0.271339
ENSG00000006634	DBF4	DBF4-CDC7 kinase regulatory subunit	10926	143	63	112	104	73	30	6.84972	3.08534	5.40064	6.46005	3.48045	6.96212	0.21599	-0.434627	0.524568	0.682493	0.234338	0.427176	0.363313	0.0952224	0.131318
ENSG00000006638	TBXA2R	thromboxane A2 receptor	6915	79	57	69	68	55	13	6.22556	4.59254	5.47382	6.94906	4.31409	4.96339	0.232413	-0.213712	-0.05155	0.691459	0.691697	1	0.371473	0.491676	1
ENSG00000006652	IFRD1	interferon related developmental regulator 1	3475	106	86	109	142	109	35	3.1266	2.59353	3.23656	5.43151	3.20014	5.00171	0.739319	0.217391	0.82116	0.0226813	0.584532	0.132769	0.000869947	0.375397	0.0133791
ENSG00000006659	LGALS14	galectin 14	56891	0	0	0	0	0	0	0	0	0	0	0	0
ENSG00000006695	COX10	cytochrome c oxidase assembly factor heme A:farnesyltransferase COX10	1352	353	312	285	276	282	61	11.5002	10.3923	9.3469	11.6602	9.14444	9.62823	0.0412036	-0.0685833	-0.0340187	0.965845	0.886323	1	0.829453	0.757608	0.934305
ENSG00000006704	GTF2IRD1	GTF2I repeat domain containing 1	9569	220	275	159	209	136	43	7.45187	9.52361	5.42163	9.18025	4.58518	7.05659	0.17511	-0.585127	-0.00335291	0.703316	0.0396108	1	0.385901	0.00743794	1
ENSG00000006712	PAF1	PAF1 homolog, Paf1/RNA polymerase II complex component	54623	2340	2493	2202	1683	2028	302	180.715	196.846	171.193	168.549	155.891	112.997	-0.241966	-0.11381	-0.617813	0.472437	0.716507	0.0326486	0.169532	0.521435	0.00126549
ENSG00000006715	VPS41	VPS41 subunit of HOPS complex	27072	148	107	168	125	175	29	4.20213	3.10612	4.80184	4.6024	4.94563	3.98924	0.0656871	0.409993	0.0604086	0.945191	0.150014	0.986681	0.782887	0.0496539	0.849197
ENSG00000006740	ARHGAP44	Rho GTPase activating protein 44	9912	97	103	71	87	81	23	2.29026	2.48643	1.68757	2.66378	1.90359	2.63102	0.183463	-0.0601555	0.3663	0.774899	0.946941	0.66653	0.47184	0.855264	0.33184
ENSG00000006744	ELAC2	elaC ribonuclease Z 2	60528	2289	2320	1939	1713	1824	310	71.9525	74.5615	61.3576	69.827	57.069	47.2113	-0.111856	-0.162131	-0.475477	0.811693	0.567904	0.129313	0.530598	0.358686	0.0127844
ENSG00000006747	SCIN	scinderin	85477	0	0	0	0	0	0	0	0	0	0	0	0
ENSG00000006756	ARSD	arylsulfatase D	414	246	195	209	177	217	38	7.70635	6.24561	6.59099	7.1904	6.76627	5.76742	-0.0514547	0.101543	-0.168504	0.962962	0.789942	0.847917	0.823503	0.617073	0.593938
ENSG00000006757	PNPLA4	patatin like phospholipase domain containing 4	8228	177	177	124	109	140	29	11.4212	11.6772	8.05475	9.12079	8.99174	9.06614	-0.308894	-0.0888615	-0.116727	0.500994	0.854114	0.938531	0.189422	0.706503	0.751406
ENSG00000006788	MYH13	myosin heavy chain 13	8735	0	0	0	0	0	0	0	0	0	0	0	0
ENSG00000006831	ADIPOR2	adiponectin receptor 2	79602	1119	1009	1033	971	792	174	42.2386	38.9401	39.2527	47.5296	29.7563	31.8209	0.120981	-0.313792	-0.256815	0.778002	0.214117	0.546296	0.477473	0.0834299	0.215672
ENSG00000006837	CDKL3	cyclin dependent kinase like 3	51265	9	4	4	6	5	1	0.62906	0.285848	0.281449	0.543834	0.347852	0.338636
ENSG00000007001	UPP2	uridine phosphorylase 2	151531	0	0	0	0	0	0	0	0	0	0	0	0
ENSG00000007038	PRSS21	serine protease 21	10942	1	0	0	1	0	0	0.111897	0	0	0.145105	0	0
ENSG00000007047	MARK4	microtubule affinity regulating kinase 4	57787	565	571	493	459	463	78	18.6835	19.3051	16.4114	19.6828	15.2393	12.4965	-0.00475912	-0.133068	-0.459022	1	0.688211	0.281858	0.999216	0.487632	0.0568046
ENSG00000007062	PROM1	prominin 1	8842	156	119	170	96	90	28	4.61875	3.60224	5.06686	3.68584	2.65227	4.01644	-0.388007	-0.621699	-0.0634049	0.364423	0.0479602	1	0.102319	0.00977466	0.917107
ENSG00000007080	CCDC124	coiled-coil domain containing 124	115098	2498	2566	2437	2022	2240	345	331.013	347.645	325.086	347.456	295.444	221.491	-0.0694221	-0.0625655	-0.51797	0.904328	0.869362	0.0870424	0.701292	0.730566	0.00620403
ENSG00000007129	CEACAM21	CEA cell adhesion molecule 21	90273	4	0	0	0	1	0	0.445323	0	0	0	0.110813	0
ENSG00000007168	PAFAH1B1	platelet activating factor acetylhydrolase 1b regulatory subunit 1	5048	820	681	681	616	687	140	21.9592	18.6456	18.3586	21.3919	18.312	18.1642	0.000663818	0.017182	-0.034301	1	0.982717	1	0.987693	0.918606	0.893594
ENSG00000007171	NOS2	nitric oxide synthase 2	4843	1	2	2	0	2	0	0.0500343	0.102312	0.100737	0	0.0996032	0
ENSG00000007174	DNAH9	dynein axonemal heavy chain 9	1770	1	3	5	4	0	0	0.0129922	0.0398502	0.0653948	0.0673921	0	0
ENSG00000007202	BLTP2	bridge-like lipid transfer protein family member 2	9703	3088	2965	2357	2765	1946	466	73.6213	72.2732	56.5687	85.4845	46.179	53.8265	0.21905	-0.428544	-0.247272	0.496586	0.0648639	0.501411	0.185814	0.0149226	0.181807
ENSG00000007216	SLC13A2	solute carrier family 13 member 2	9058	0	0	0	0	0	0	0	0	0	0	0	0
ENSG00000007237	GAS7	growth arrest specific 7	8522	77	66	67	58	30	11	1.678	1.47052	1.46983	1.63906	0.650725	1.16139	-0.032278	-1.1212	-0.327535	1	0.00523678	0.856765	0.9952	0.000515633	0.604772
ENSG00000007255	TRAPPC6A	trafficking protein particle complex subunit 6A	79090	137	133	135	101	210	24	32.3192	32.0788	32.0601	30.8978	49.31	27.4306	-0.180544	0.733905	-0.151262	0.778002	0.00387683	0.931569	0.478505	0.000344434	0.734365
ENSG00000007264	MATK	megakaryocyte-associated tyrosine kinase	4145	0	0	0	0	0	0	0	0	0	0	0	0
ENSG00000007306	CEACAM7	CEA cell adhesion molecule 7	1087	0	0	0	1	3	0	0	0	0	0.107585	0.247732	0
ENSG00000007312	CD79B	CD79b molecule	974	6	6	8	1	13	0	0.634907	0.649137	0.852195	0.137222	1.36923	0	-2.37594	1.0466	-5.44748	0.263258	0.184632	0.53978	0.0537067	0.067205	0.209988
ENSG00000007314	SCN4A	sodium voltage-gated channel alpha subunit 4	6329	5	4	3	3	7	4	0.133508	0.1092	0.0806396	0.103878	0.186042	0.517465	-0.170681	0.884103	2.29675	1	0.568481	0.153133	1	0.35967	0.0172262
ENSG00000007341	ST7L	suppression of tumorigenicity 7 like	54879	61	52	77	52	107	14	1.65592	1.44324	2.10421	1.83053	2.89113	1.84128	-0.0462685	0.852513	0.162701	1	0.00474228	0.909069	0.946919	0.000452427	0.698322
ENSG00000007350	TKTL1	transketolase like 1	8277	0	0	0	0	3	0	0	0	0	0	0.186396	0
ENSG00000007372	PAX6	paired box 6	5080	9	8	12	7	7	1	0.0959789	0.0872268	0.128826	0.0968049	0.0743031	0.0516675	-0.224248	-0.362936	-0.911625	0.987028	0.777513	0.986681	0.882325	0.598927	0.852358
ENSG00000007376	RPUSD1	RNA pseudouridine synthase domain containing 1	113000	2276	2365	2133	1897	2119	380	180.914	192.201	170.679	195.538	167.651	146.341	-0.0143915	0.00441259	-0.231492	1	1	0.552095	0.950584	0.965802	0.219105
ENSG00000007384	RHBDF1	rhomboid 5 homolog 1	64285	130	123	96	142	93	22	5.82278	5.63272	4.32861	8.24786	4.14615	4.77412	0.525986	-0.224703	-0.0612222	0.131831	0.583924	1	0.0157836	0.374928	0.89837
ENSG00000007392	LUC7L	LUC7 like	55692	335	385	363	248	373	56	11.9388	14.0282	13.023	11.4613	13.2312	9.66912	-0.305947	0.14186	-0.350209	0.405758	0.652033	0.50885	0.126525	0.448043	0.186113
ENSG00000007402	CACNA2D2	calcium voltage-gated channel auxiliary subunit alpha2delta 2	9254	145	138	104	124	79	13	5.04819	4.91217	3.64495	5.59829	2.7376	2.19278	0.1817	-0.608656	-0.967681	0.733468	0.0605925	0.182629	0.422063	0.0135606	0.0238626
ENSG00000007516	BAIAP3	BAI1 associated protein 3	8938	241	258	204	199	180	30	8.63071	9.4466	7.35445	9.24163	6.41619	5.20517	0.00149891	-0.28396	-0.625181	1	0.367657	0.25862	1	0.187193	0.047448
ENSG00000007520	TSR3	TSR3 ribosome maturation factor	115939	1211	1332	1498	983	1978	227	220.283	247.724	274.308	231.876	358.128	200.054	-0.219352	0.648497	-0.231313	0.541271	0.00140211	0.577361	0.221932	9.11323e-05	0.245292
ENSG00000007541	PIGQ	phosphatidylinositol glycan anchor biosynthesis class Q	9091	276	278	291	198	357	38	7.68571	7.91492	8.15752	7.15	9.89507	5.12676	-0.271198	0.438059	-0.549862	0.514032	0.0771618	0.287495	0.199707	0.0191436	0.0596121
ENSG00000007545	CRAMP1	cramped chromatin regulator homolog 1	57585	177	178	180	178	157	27	4.6528	4.78396	4.76325	6.06774	4.10786	3.43866	0.234567	-0.0871827	-0.383205	0.580924	0.857575	0.610532	0.25658	0.712411	0.274217
ENSG00000007866	TEAD3	TEA domain transcription factor 3	7005	632	640	482	472	384	84	45.6228	47.2358	35.0269	44.1848	27.5912	29.3784	-0.0706468	-0.509069	-0.458313	0.911649	0.0403808	0.267685	0.717383	0.00765266	0.0508191
ENSG00000007908	SELE	selectin E	6401	0	0	0	0	0	0	0	0	0	0	0	0
ENSG00000007923	DNAJC11	DnaJ heat shock protein family (Hsp40) member C11	55735	1865	1842	1614	1580	1372	290	80.7571	81.5489	70.3551	88.7207	59.1332	60.8393	0.0711615	-0.273315	-0.272076	0.886512	0.278035	0.469805	0.665506	0.1231	0.158532
ENSG00000007933	FMO3	flavin containing dimethylaniline monoxygenase 3	2328	0	0	0	0	0	0	0	0	0	0	0	0
ENSG00000007944	MYLIP	myosin regulatory light chain interacting protein	29116	69	42	50	51	45	9	4.94367	3.07664	3.60629	4.73846	3.20914	3.12412	0.166965	-0.153699	-0.231886	0.827042	0.80354	0.923293	0.554201	0.635032	0.719762
ENSG00000007952	NOX1	NADPH oxidase 1	27035	0	0	0	0	0	0	0	0	0	0	0	0
ENSG00000007968	E2F2	E2F transcription factor 2	1870	568	580	498	578	407	78	22.8886	23.896	20.2018	30.204	16.3245	15.2282	0.312624	-0.334121	-0.474141	0.319895	0.204763	0.25868	0.0787665	0.0781162	0.0478308
ENSG00000008018	PSMB1	proteasome 20S subunit beta 1	5689	2521	2753	2908	1746	4155	513	250.056	279.188	290.368	224.582	410.215	246.528	-0.408028	0.70186	-0.0725375	0.154165	0.000351817	0.912668	0.0206168	1.58165e-05	0.703935
ENSG00000008056	SYN1	synapsin I	6853	9	1	12	4	5	0	0.530648	0.0602824	0.712255	0.305837	0.293433	0	-0.621549	-0.445248	-5.58101	0.896166	0.786457	0.429885	0.687164	0.612794	0.134286
ENSG00000008083	JARID2	jumonji and AT-rich interaction domain containing 2	3720	144	100	144	145	75	22	5.076	3.60401	5.10989	6.62816	2.63145	3.75721	0.404842	-0.685888	-0.212472	0.286793	0.0334805	0.866838	0.0640447	0.00591108	0.620446
ENSG00000008086	CDKL5	cyclin dependent kinase like 5	6792	22	13	21	18	10	1	0.255756	0.154516	0.245761	0.271357	0.115712	0.0563231	0.185489	-0.794914	-1.84887	0.94596	0.357581	0.543492	0.785014	0.178869	0.212677
ENSG00000008118	CAMK1G	calcium/calmodulin dependent protein kinase IG	57172	5	4	4	4	1	0	0.330681	0.270474	0.266311	0.343056	0.0658285	0
ENSG00000008128	CDK11A	cyclin dependent kinase 11A	728642	11	19	21	8	26	2	0.476128	0.840836	0.915041	0.449042	1.12016	0.419416	-0.84198	0.704688	-0.739306	0.434202	0.223316	0.908568	0.145176	0.0888639	0.697419
ENSG00000008130	NADK	NAD kinase	65220	612	583	526	507	469	81	24.1834	23.5539	20.9239	25.9801	18.4465	15.5073	0.0602403	-0.192957	-0.483051	0.917439	0.513168	0.244061	0.728812	0.306667	0.042211
ENSG00000008196	TFAP2B	transcription factor AP-2 beta	7021	0	0	0	0	0	0	0	0	0	0	0	0
ENSG00000008197	TFAP2D	transcription factor AP-2 delta	83741	0	0	0	0	0	0	0	0	0	0	0	0
ENSG00000008226	DLEC1	DLEC1 cilia and flagella associated protein	9940	1	0	0	1	1	0	0.0263973	0	0	0.0342315	0.0262746	0
ENSG00000008256	CYTH3	cytohesin 3	9265	276	236	220	237	183	34	10.4593	9.14395	8.39283	11.6469	6.90275	6.2425	0.197728	-0.315892	-0.500539	0.63535	0.301098	0.387429	0.311231	0.138324	0.106317
ENSG00000008277	ADAM22	ADAM metallopeptidase domain 22	53616	38	40	46	36	47	13	0.685617	0.737878	0.835499	0.842299	0.844056	1.13638	0.0380253	0.281164	0.669166	1	0.600172	0.482968	0.920237	0.391735	0.171369
ENSG00000008282	SYPL1	synaptophysin like 1	6856	377	347	438	324	216	69	29.5928	27.8484	34.6105	32.9803	16.8761	26.2408	-0.0199834	-0.745491	-0.148721	1	0.00310214	0.839042	0.949249	0.000261724	0.57817
ENSG00000008283	CYB561	cytochrome b561	1534	2269	2401	2339	1830	2158	392	94.2993	102.022	97.8576	98.6259	89.2691	78.9304	-0.116111	-0.0191239	-0.236487	0.800845	0.988295	0.539038	0.513675	0.928152	0.207944
ENSG00000008294	SPAG9	sperm associated antigen 9	9043	314	254	338	309	190	114	5.77567	4.77676	6.25864	7.37051	3.47858	10.1593	0.272105	-0.56996	0.935813	0.443377	0.0338107	0.00242546	0.150488	0.00598972	3.01359e-05
ENSG00000008300	CELSR3	cadherin EGF LAG seven-pass G-type receptor 3	1951	90	96	101	132	118	16	1.43026	1.5598	1.61579	2.72027	1.86651	1.2319	0.700702	0.398383	-0.239982	0.03604	0.211968	0.849252	0.00185943	0.0821363	0.595873
ENSG00000008311	AASS	aminoadipate-semialdehyde synthase	10157	12	6	9	5	7	3	0.39634	0.202612	0.29924	0.214152	0.230123	0.480056	-0.598176	-0.260321	0.746547	0.837774	0.912748	0.751638	0.573871	0.799781	0.441092
ENSG00000008323	PLEKHG6	pleckstrin homology and RhoGEF domain containing G6	55200	442	459	409	324	412	61	22.8368	24.2466	21.2729	21.7082	21.1878	15.2696	-0.19329	0.0124371	-0.499719	0.648108	0.999797	0.264854	0.323786	0.9461	0.0498923
ENSG00000008324	SS18L2	SS18 like 2	51188	185	236	235	87	253	44	31.3703	40.9153	40.1149	19.1308	42.7015	36.148	-1.09415	0.303916	0.0238856	0.000496925	0.276776	1	3.41906e-06	0.122044	0.935793
ENSG00000008382	MPND	MPN domain containing	84954	270	302	262	183	244	29	29.0031	33.1676	28.3316	25.4916	26.0883	15.0925	-0.366686	-0.092658	-0.921344	0.324412	0.83056	0.0583781	0.0808104	0.67219	0.00310915
ENSG00000008394	MGST1	microsomal glutathione S-transferase 1	4257	661	450	729	434	564	124	19.552	13.6091	21.7074	16.6474	16.6052	17.7704	-0.258048	-0.0209627	0.0370584	0.480226	0.989677	0.990302	0.174291	0.930019	0.859889
ENSG00000008405	CRY1	cryptochrome circadian regulator 1	1407	77	58	54	69	48	15	3.54408	2.7294	2.50205	4.11839	2.19902	3.34494	0.370678	-0.292413	0.271635	0.4588	0.58221	0.803014	0.159584	0.3734	0.523999
ENSG00000008438	PGLYRP1	peptidoglycan recognition protein 1	8993	0	0	0	0	0	0	0	0	0	0	0	0
ENSG00000008441	NFIX	nuclear factor I X	4784	716	654	564	847	505	118	25.0067	23.3533	19.8296	38.3613	17.5554	19.9669	0.633083	-0.253696	-0.10783	0.0101769	0.350129	0.882506	0.000239296	0.173728	0.647245
ENSG00000008513	ST3GAL1	ST3 beta-galactoside alpha-2,3-sialyltransferase 1	6482	238	237	198	250	178	39	5.91776	6.02498	4.95606	8.06095	4.40531	4.69818	0.394187	-0.236377	-0.183328	0.236862	0.464402	0.828104	0.0437491	0.264526	0.56181
ENSG00000008516	MMP25	matrix metallopeptidase 25	64386	15	10	17	8	12	0	0.777559	0.529991	0.887118	0.537772	0.619154	0	-0.562317	-0.123441	-6.49991	0.71233	1	0.188568	0.396614	1	0.0255833
ENSG00000008517	IL32	interleukin 32	9235	9	14	12	14	15	3	0.617298	0.981764	0.82856	1.24522	1.02404	0.996914	0.495762	0.454862	0.376134	0.672112	0.56076	0.968491	0.352713	0.352713	0.81594
ENSG00000008710	PKD1	polycystin 1, transient receptor potential channel interacting	5310	357	352	286	492	464	68	4.24002	4.27434	3.41945	7.57758	5.48521	3.91285	0.807007	0.581674	0.0547038	0.000836491	0.0110895	0.973399	7.16425e-06	0.00137489	0.82339
ENSG00000008735	MAPK8IP2	mitogen-activated protein kinase 8 interacting protein 2	23542	112	118	120	59	70	15	4.25536	4.58381	4.58976	2.90694	2.64723	2.76117	-0.745435	-0.639864	-0.618708	0.0701573	0.0567622	0.458144	0.00534264	0.0123459	0.151643
ENSG00000008838	MED24	mediator complex subunit 24	9862	2223	2274	1965	2057	1076	271	70.2793	73.503	62.5376	84.3312	33.8591	41.5089	0.170911	-0.904728	-0.650666	0.62937	2.74567e-05	0.0237979	0.304452	6.69453e-07	0.000778957
ENSG00000008853	RHOBTB2	Rho related BTB domain containing 2	23221	345	372	243	331	251	45	11.5403	12.7223	8.18263	14.3579	8.3569	7.29277	0.286325	-0.253462	-0.489588	0.406047	0.396484	0.339111	0.126751	0.209445	0.0819801
ENSG00000008869	HEATR5B	HEAT repeat containing 5B	54497	84	59	54	80	57	23	2.24429	1.61168	1.45239	2.77176	1.51583	2.97723	0.52473	-0.104086	0.828265	0.221498	0.894122	0.233147	0.0389286	0.769649	0.038475
ENSG00000008952	SEC62	SEC62 homolog, preprotein translocation factor	7095	195	153	238	161	200	61	5.41369	4.34287	6.65159	5.79629	5.52667	8.20488	-0.0401069	0.131865	0.661793	0.984777	0.719662	0.127359	0.876037	0.526209	0.0124382
ENSG00000008988	RPS20	ribosomal protein S20	6224	24514	25124	28760	16333	41150	4982	1797.32	1883.33	2122.71	1552.9	3003.01	1769.7	-0.442023	0.750215	-0.0524875	0.103329	8.74897e-05	0.946005	0.0105759	2.69424e-06	0.770498
ENSG00000009307	CSDE1	cold shock domain containing E1	7812	3678	3319	3371	2951	3437	744	140.106	129.264	129.269	145.774	130.317	137.31	0.0110356	0.09012	0.125732	1	0.763077	0.767348	0.933766	0.57998	0.460432
ENSG00000009335	UBE3C	ubiquitin protein ligase E3C	9690	852	672	814	746	741	199	20.3501	16.4105	19.5723	23.1064	17.6165	23.0284	0.177158	0.0266204	0.373243	0.630082	0.955625	0.28344	0.30536	0.872766	0.0575618
ENSG00000009413	REV3L	REV3 like, DNA directed polymerase zeta catalytic subunit	5980	67	31	49	69	19	9	1.18686	0.561454	0.8738	1.58504	0.335008	0.772418	0.734075	-1.26061	-0.100131	0.0834784	0.00652828	1	0.00718993	0.000689023	0.91359
ENSG00000009694	TENM1	teneurin transmembrane protein 1	10178	0	0	0	0	0	0	0	0	0	0	0	0
ENSG00000009709	PAX7	paired box 7	5081	0	0	0	0	0	0	0	0	0	0	0	0
ENSG00000009724	MASP2	MBL associated serine protease 2	10747	8	1	5	6	5	1	0.413627	0.0528622	0.260243	0.402287	0.257314	0.250497
ENSG00000009765	IYD	iodotyrosine deiodinase	389434	0	0	0	0	0	0	0	0	0	0	0	0
ENSG00000009780	FAM76A	family with sequence similarity 76 member A	199870	36	29	42	37	29	6	1.96421	1.61775	2.30688	2.6179	1.57492	1.58607	0.290439	-0.200169	-0.229471	0.702544	0.838079	1	0.384904	0.683575	0.892058
ENSG00000009790	TRAF3IP3	TRAF3 interacting protein 3	80342	0	0	0	0	0	0	0	0	0	0	0	0
ENSG00000009830	POMT2	protein O-mannosyltransferase 2	29954	267	266	271	252	326	45	5.872	5.98113	5.99977	7.18689	7.13621	4.79481	0.148532	0.379032	-0.234147	0.753828	0.144727	0.737914	0.446002	0.0467727	0.423336
ENSG00000009844	VTA1	vesicle trafficking 1	51534	255	196	271	168	193	55	7.73295	6.07698	8.27303	6.60663	5.82556	8.08075	-0.278816	-0.219576	0.212463	0.513643	0.505018	0.735538	0.199418	0.299907	0.419163
ENSG00000009950	MLXIPL	MLX interacting protein like	51085	424	352	370	283	608	70	19.3817	16.4511	17.0262	16.7756	27.6633	15.5027	-0.19277	0.769372	-0.105639	0.659563	0.000304875	0.911524	0.339726	1.33192e-05	0.702123
ENSG00000009954	BAZ1B	bromodomain adjacent to zinc finger domain 1B	9031	1496	1366	1258	1372	1214	395	46.639	43.5406	39.481	55.4673	37.6714	59.6621	0.237742	-0.0796004	0.543886	0.458225	0.825571	0.0511369	0.159139	0.664731	0.0025039
ENSG00000010017	RANBP9	RAN binding protein 9	10048	217	201	232	233	139	50	13.2012	12.5019	14.208	18.3813	8.41674	14.7369	0.342608	-0.542927	0.224842	0.327336	0.0628157	0.728444	0.0822969	0.0142542	0.405496
ENSG00000010030	ETV7	ETS variant transcription factor 7	51513	20	11	8	4	10	0	1.85426	1.0427	0.746658	0.480914	0.922819	0	-1.43584	-0.276617	-6.39311	0.309693	0.937308	0.233147	0.0743177	0.839945	0.0388578
ENSG00000010072	SPRTN	SprT-like N-terminal domain	83932	63	47	73	66	43	15	2.34784	1.79082	2.73868	3.18962	1.59504	2.70834	0.351873	-0.405474	0.316836	0.515547	0.357819	0.784493	0.200433	0.179101	0.4932
ENSG00000010165	METTL13	methyltransferase 13, eEF1A N-terminus and K55	51603	1406	1335	1131	961	909	202	80.7784	78.4183	65.4128	71.5977	51.9815	56.227	-0.186656	-0.407745	-0.334281	0.625477	0.0886757	0.370088	0.30058	0.0235857	0.0970832
ENSG00000010219	DYRK4	dual specificity tyrosine phosphorylation regulated kinase 4	8798	131	119	119	78	233	27	4.0875	3.7963	3.73787	3.15607	7.23632	4.08164	-0.417974	1.01868	0.153345	0.360691	2.00665e-05	0.900254	0.100298	4.63795e-07	0.678455
ENSG00000010244	ZNF207	zinc finger protein 207	7756	1689	1555	1520	1158	1116	311	23.478	22.0998	21.2699	20.874	15.4408	20.9448	-0.216815	-0.410953	-0.0109505	0.543833	0.0834091	1	0.224455	0.0214512	0.974977
ENSG00000010256	UQCRC1	ubiquinol-cytochrome c reductase core protein 1	7384	6111	6130	5879	4785	5923	1013	419.799	430.543	406.559	426.263	404.992	337.15	-0.0987584	0.0681884	-0.236108	0.837774	0.829597	0.506107	0.573414	0.670411	0.184389
ENSG00000010270	STARD3NL	STARD3 N-terminal like	83930	168	145	173	110	143	29	8.50436	7.50459	8.81595	7.22089	7.20517	7.11237	-0.319544	-0.0821119	-0.140536	0.478728	0.86341	0.926046	0.173391	0.721581	0.724299
ENSG00000010278	CD9	CD9 molecule	928	1043	1143	1128	784	738	156	55.1177	61.7561	60.0076	53.7265	38.8185	39.9407	-0.258912	-0.48697	-0.48564	0.449732	0.0405767	0.168004	0.153996	0.00769793	0.0199765
ENSG00000010282	HHATL	hedgehog acyltransferase like	57467	2	0	0	0	0	0	0.152425	0	0	0	0	0
ENSG00000010292	NCAPD2	non-SMC condensin I complex subunit D2	9918	6221	5638	4722	5602	2362	748	211.63	196.096	161.709	247.131	79.9785	123.283	0.25925	-1.1275	-0.543026	0.384599	6.70084e-08	0.0529689	0.1138	5.28189e-10	0.00267852
ENSG00000010295	IFFO1	intermediate filament family orphan 1	25900	0	5	1	5	5	0	0	0.216254	0.0425852	0.274286	0.21053	0
ENSG00000010310	GIPR	gastric inhibitory polypeptide receptor	2696	29	15	23	15	32	3	1.25921	0.665913	1.00535	0.844611	1.38301	0.63111	-0.332188	0.615036	-0.549069	0.811693	0.26596	0.874088	0.530795	0.114894	0.633585
ENSG00000010318	PHF7	PHD finger protein 7	51533	22	40	30	29	35	6	1.43942	2.67579	1.97596	2.46054	2.27934	1.90196	0.15456	0.284556	-0.0152311	0.903162	0.625502	1	0.698759	0.418892	1
ENSG00000010319	SEMA3G	semaphorin 3G	56920	38	43	49	28	28	2	1.65719	1.91727	2.15117	1.58348	1.21541	0.422574	-0.391645	-0.531966	-2.08091	0.614105	0.323426	0.152708	0.290033	0.153654	0.0171376
ENSG00000010322	NISCH	nischarin	11188	718	772	600	679	680	123	17.439	19.1709	14.6703	21.3862	16.4393	14.474	0.199943	0.0612317	-0.162206	0.57757	0.863699	0.7738	0.253249	0.721999	0.47053
ENSG00000010327	STAB1	stabilin 1	23166	1	0	1	1	0	0	0.0207878	0	0.0209266	0.0269571	0	0
ENSG00000010361	FUZ	fuzzy planar cell polarity protein	80199	15	27	12	16	11	8	1.11802	2.05754	0.900389	1.54648	0.816069	2.8889	0.0664248	-0.609178	1.16251	1	0.526022	0.340777	0.976969	0.318635	0.0825651
ENSG00000010379	SLC6A13	solute carrier family 6 member 13	6540	1	2	1	1	3	0	0.0518739	0.106073	0.0522203	0.067269	0.154898	0
ENSG00000010404	IDS	iduronate 2-sulfatase	3423	36	34	23	54	8	6	0.852554	0.823237	0.548324	1.65836	0.188575	0.688422	1.03629	-1.841	-0.0278651	0.0198126	0.00396244	1	0.000708218	0.000357599	1
ENSG00000010438	PRSS3	serine protease 3	5646	1186	1201	1154	1194	1581	273	156.875	162.42	153.661	204.804	208.15	174.951	0.253745	0.517899	0.227443	0.419263	0.0147302	0.555687	0.135301	0.00199748	0.223611
ENSG00000010539	ZNF200	zinc finger protein 200	7752	74	53	66	45	51	8	2.17224	1.59067	1.95034	1.71299	1.49012	1.13776	-0.275227	-0.235621	-0.663112	0.692064	0.673239	0.618074	0.3734	0.471447	0.281829
ENSG00000010610	CD4	CD4 molecule	920	0	0	2	0	0	0	0	0	0.0972441	0	0	0
ENSG00000010626	LRRC23	leucine rich repeat containing 23	10233	140	144	158	91	170	14	10.0964	10.6176	11.4706	8.5103	12.2029	4.89158	-0.457668	0.30236	-1.0544	0.276071	0.316173	0.106236	0.0596401	0.148844	0.00892365
ENSG00000010671	BTK	Bruton tyrosine kinase	695	2	2	2	0	1	0	0.096219	0.0983756	0.0968615	0	0.0478858	0
ENSG00000010704	HFE	homeostatic iron regulator	3077	193	185	165	106	120	23	7.48537	7.33592	6.44214	5.33124	4.63247	4.32183	-0.53307	-0.495007	-0.634672	0.158779	0.107159	0.31579	0.0217963	0.0307318	0.0721865
ENSG00000010803	SCMH1	Scm polycomb group protein homolog 1	22955	179	177	153	157	150	35	8.85947	8.95684	7.62319	10.0767	7.38961	8.3928	0.126075	-0.0804311	0.0633041	0.834471	0.883951	0.980196	0.564687	0.753287	0.838187
ENSG00000010810	FYN	FYN proto-oncogene, Src family tyrosine kinase	2534	88	101	70	74	74	13	2.61353	3.06685	2.09283	2.84999	2.18752	1.87056	0.014833	-0.12581	-0.390815	1	0.82909	0.728315	0.9648	0.669309	0.403524
ENSG00000010818	HIVEP2	HIVEP zinc finger 2	3097	30	30	25	44	39	9	0.619712	0.633602	0.519875	1.17866	0.801879	0.900731	0.870214	0.556251	0.683231	0.0836157	0.229658	0.58144	0.00723887	0.0926608	0.248345
ENSG00000010932	FMO1	flavin containing dimethylaniline monoxygenase 1	2326	0	0	0	0	0	0	0	0	0	0	0	0
ENSG00000011007	ELOA	elongin A	6924	521	577	480	422	405	94	21.2711	24.0855	19.7281	22.3425	16.4582	18.5936	-0.0814133	-0.281539	-0.145368	0.896158	0.302993	0.820044	0.684222	0.13954	0.548234
ENSG00000011009	LYPLA2	lysophospholipase 2	11313	2041	1988	1789	1372	1602	288	222.279	221.36	196.136	193.765	173.658	151.961	-0.261151	-0.178423	-0.41074	0.42737	0.520456	0.215181	0.140458	0.313575	0.0327587
ENSG00000011021	CLCN6	chloride voltage-gated channel 6	1185	105	72	63	56	106	22	2.82768	1.98244	1.70794	1.95566	2.84133	2.87043	-0.272681	0.505858	0.480638	0.678892	0.115782	0.555255	0.358901	0.0343169	0.22296
ENSG00000011028	MRC2	mannose receptor C type 2	9902	126	133	132	91	109	14	4.20767	4.54097	4.43747	3.94074	3.62304	2.26508	-0.28089	-0.161501	-0.877658	0.567413	0.716135	0.233147	0.24406	0.520573	0.0387764
ENSG00000011052	NME1-NME2	NME1-NME2 readthrough	654364	1	2	0	3	0	0	0.177358	0.362666	0	0.689981	0	0
ENSG00000011083	SLC6A7	solute carrier family 6 member 7	6534	0	0	0	0	0	0	0	0	0	0	0	0
ENSG00000011105	TSPAN9	tetraspanin 9	10867	297	288	258	271	269	46	9.46705	9.38593	8.27882	11.2019	8.53466	7.10395	0.185871	0.0343907	-0.269939	0.660386	0.948021	0.691841	0.340648	0.85781	0.359217
ENSG00000011114	BTBD7	BTB domain containing 7	55727	193	135	177	209	134	25	3.7483	2.68063	3.46051	5.26368	2.59034	2.35235	0.552613	-0.228973	-0.407565	0.0790389	0.526503	0.58326	0.00650608	0.319137	0.250175
ENSG00000011132	APBA3	amyloid beta precursor protein binding family A member 3	9546	276	262	228	214	229	51	10.8556	10.5359	9.02754	10.915	8.9651	9.71848	-0.0161386	-0.0592386	0.0173321	1	0.912318	1	0.959972	0.797623	0.941453
ENSG00000011143	MKS1	MKS transition zone complex subunit 1	54903	413	391	343	345	408	73	22.2908	21.5764	18.6363	24.1468	21.9185	19.0889	0.0904046	0.191489	-0.0476426	0.868154	0.500197	0.994675	0.629211	0.296201	0.876967
ENSG00000011198	ABHD5	abhydrolase domain containing 5, lysophosphatidic acid acyltransferase	51099	158	113	160	122	105	39	4.61281	3.37298	4.70239	4.61885	3.05122	5.51641	0.0042223	-0.35277	0.460992	1	0.308694	0.433757	0.996776	0.143294	0.136647
ENSG00000011201	ANOS1	anosmin 1	3730	0	0	0	0	0	0	0	0	0	0	0	0
ENSG00000011243	AKAP8L	A-kinase anchoring protein 8 like	26993	1225	1346	1247	1027	1129	199	53.086	59.6369	54.4002	57.7139	48.6982	41.7812	-0.0734938	-0.0777429	-0.338519	0.899472	0.831003	0.362197	0.691999	0.673129	0.0936584
ENSG00000011258	MBTD1	mbt domain containing 1	54799	155	93	96	138	65	18	4.74884	2.91317	2.96086	5.48278	1.98219	2.67185	0.509672	-0.715824	-0.325408	0.155619	0.0353415	0.768776	0.0210195	0.0063695	0.465425
ENSG00000011260	UTP18	UTP18 small subunit processome component	51096	535	444	489	313	287	74	43.5642	36.9646	40.0844	33.0511	23.2613	29.1939	-0.404738	-0.670611	-0.382756	0.217806	0.00614352	0.402804	0.0374523	0.000636923	0.114892
ENSG00000011275	RNF216	ring finger protein 216	54476	782	726	616	671	634	162	22.5908	21.4431	17.9141	25.1369	18.2301	22.6737	0.161716	-0.0609333	0.213912	0.673478	0.886804	0.629427	0.354105	0.758197	0.291126
ENSG00000011295	TTC19	tetratricopeptide repeat domain 19	54902	545	481	638	441	829	132	19.8142	17.8793	23.3502	20.7914	29.9992	23.2508	-0.0928713	0.676717	0.269327	0.86873	0.00133787	0.53327	0.631271	8.59741e-05	0.203954
ENSG00000011304	PTBP1	polypyrimidine tract binding protein 1	5725	8705	8466	7843	8577	5539	1224	278.364	276.789	252.474	355.669	176.299	189.631	0.278765	-0.492928	-0.42756	0.337317	0.0280701	0.146883	0.0879267	0.00464648	0.0158461
ENSG00000011332	DPF1	double PHD fingers 1	8193	119	126	141	146	169	24	5.45667	5.90715	6.50864	8.68159	7.71335	5.33183	0.418692	0.488846	-0.0831687	0.273492	0.0862739	0.999692	0.0580782	0.0226087	0.888303
ENSG00000011347	SYT7	synaptotagmin 7	9066	560	548	407	409	310	65	20.7049	20.7154	15.1485	19.6099	11.4084	11.6435	-0.0653849	-0.605904	-0.616222	0.92683	0.0146339	0.129317	0.747036	0.00197757	0.012802
ENSG00000011376	LARS2	leucyl-tRNA synthetase 2, mitochondrial	23395	735	647	578	572	468	97	13.0389	11.7351	10.3222	13.1588	8.26374	8.33702	0.0480425	-0.382228	-0.409262	0.944775	0.135711	0.317404	0.781759	0.0428987	0.0729063
ENSG00000011405	PIK3C2A	phosphatidylinositol-4-phosphate 3-kinase catalytic subunit type 2 alpha	5286	74	44	76	109	29	24	1.76961	1.07578	1.82957	3.38016	0.69027	2.78061	0.992036	-1.05452	0.911153	0.00253843	0.011455	0.169807	3.32353e-05	0.00143213	0.020361
ENSG00000011422	PLAUR	plasminogen activator, urokinase receptor	5329	340	315	245	258	476	67	16.7903	15.9044	12.1797	16.5221	23.3971	16.0302	0.0217936	0.764283	0.179108	0.999945	0.000490799	0.77168	0.909235	2.34416e-05	0.468276
ENSG00000011426	ANLN	anillin, actin binding protein	54443	454	381	302	546	168	69	16.6626	14.2968	11.158	25.9864	6.13723	12.2693	0.767456	-1.0731	-0.113993	0.00146784	1.56848e-05	0.900254	1.60806e-05	3.40518e-07	0.677775
ENSG00000011451	WIZ	WIZ zinc finger	58525	915	865	715	985	573	140	20.4959	19.8102	16.1228	28.6119	12.7754	15.1935	0.483045	-0.43926	-0.22901	0.065669	0.0727634	0.623056	0.00476342	0.0177121	0.286472
ENSG00000011454	RABGAP1	RAB GTPase activating protein 1	23637	168	170	173	136	174	49	4.04076	4.18051	4.1888	4.24188	4.16561	5.70997	-0.0873388	0.127124	0.541956	0.911392	0.736928	0.281122	0.716937	0.547592	0.0562056
ENSG00000011465	DCN	decorin	1634	0	0	0	0	0	0	0	0	0	0	0	0
ENSG00000011478	QPCTL	glutaminyl-peptide cyclotransferase like	54814	275	245	244	188	289	49	27.351	24.9134	24.4298	24.2474	28.6097	23.6113	-0.198755	0.280487	-0.0361891	0.667166	0.305573	1	0.347399	0.141172	0.950946
ENSG00000011485	PPP5C	protein phosphatase 5 catalytic subunit	5536	1534	1529	1227	1284	994	226	47.628	48.5368	38.3506	51.6973	30.7184	33.9961	0.0828066	-0.427328	-0.320866	0.862278	0.0714199	0.387447	0.619377	0.0172801	0.10641
ENSG00000011523	CEP68	centrosomal protein 68	23177	245	235	201	222	149	50	6.25359	6.13279	5.16476	7.34823	3.78552	6.18326	0.206287	-0.509366	0.158266	0.621883	0.076834	0.822728	0.297773	0.019052	0.55167
ENSG00000011566	MAP4K3	mitogen-activated protein kinase kinase kinase kinase 3	8491	27	30	31	34	12	10	0.981296	1.11477	1.1342	1.60244	0.434103	1.76084	0.448817	-1.18486	0.7843	0.520998	0.0528796	0.499972	0.204722	0.011134	0.181152
ENSG00000011590	ZBTB32	zinc finger and BTB domain containing 32	27033	0	2	0	0	0	0	0	0.164319	0	0	0	0
ENSG00000011600	TYROBP	transmembrane immune signaling adaptor TYROBP	7305	0	0	0	0	0	1	0	0	0	0	0	1.17571
ENSG00000011638	LDAF1	lipid droplet assembly factor 1	57146	215	180	244	151	252	42	18.4995	15.8351	21.135	16.8486	21.5823	17.5087	-0.257571	0.340093	-0.00129802	0.557115	0.212548	1	0.236653	0.0824636	1
ENSG00000011677	GABRA3	gamma-aminobutyric acid type A receptor subunit alpha3	2556	0	4	0	1	0	0	0	0.2169	0	0.0687765	0	0
ENSG00000012048	BRCA1	BRCA1 DNA repair associated	672	224	178	173	246	195	63	5.29794	4.30433	4.11903	7.54501	4.5906	7.21911	0.600234	0.124445	0.737392	0.0411091	0.732555	0.0779061	0.00227377	0.542356	0.00515731
ENSG00000012061	ERCC1	ERCC excision repair 1, endonuclease non-catalytic subunit	2067	986	1045	914	1009	1428	204	38.9203	42.1737	36.3192	51.6483	56.1052	39.0134	0.276378	0.636555	0.0726457	0.372818	0.00204316	0.913735	0.10664	0.000148631	0.705291
ENSG00000012124	CD22	CD22 molecule	933	118	121	90	193	185	30	4.2128	4.41673	3.23461	8.93536	6.5741	5.18913	1.05271	0.850913	0.469984	0.000104352	0.000916104	0.485165	4.80983e-07	5.22614e-05	0.17317
ENSG00000012171	SEMA3B	semaphorin 3B	7869	195	164	183	127	298	26	7.441	6.39834	7.02972	6.28444	11.3185	4.80678	-0.26905	0.819922	-0.454514	0.554207	0.000465157	0.527454	0.233754	2.19994e-05	0.19939
ENSG00000012174	MBTPS2	membrane bound transcription factor peptidase, site 2	51360	110	81	77	102	47	24	2.70666	2.03776	1.90732	3.25468	1.15111	2.86113	0.431423	-0.825141	0.446362	0.292824	0.0249564	0.555255	0.0666824	0.00394268	0.222794
ENSG00000012211	PRICKLE3	prickle planar cell polarity protein 3	4007	363	308	296	278	239	47	21.8536	18.958	17.939	21.7033	14.3215	13.7087	0.0264478	-0.332327	-0.435116	0.984521	0.249333	0.403742	0.875612	0.104197	0.115337
ENSG00000012223	LTF	lactotransferrin	4057	0	0	0	0	0	0	0	0	0	0	0	0
ENSG00000012232	EXTL3	exostosin like glycosyltransferase 3	2137	1223	1111	924	1081	974	193	20.6334	19.164	15.693	23.6503	16.3561	15.7756	0.233015	-0.0581837	-0.150099	0.476319	0.887913	0.7738	0.17185	0.759501	0.471111
ENSG00000012504	NR1H4	nuclear receptor subfamily 1 group H member 4	9971	0	0	0	0	0	0	0	0	0	0	0	0
ENSG00000012660	ELOVL5	ELOVL fatty acid elongase 5	60481	407	307	377	265	307	88	23.4936	18.1184	21.9072	19.8366	17.6388	24.6106	-0.21592	-0.144562	0.295996	0.605337	0.676735	0.534898	0.279307	0.475197	0.205312
ENSG00000012779	ALOX5	arachidonate 5-lipoxygenase	240	99	91	83	74	77	8	5.84182	5.49011	4.93039	5.66253	4.52251	2.28711	-0.0595574	-0.14296	-1.16349	0.983544	0.787416	0.176048	0.871589	0.614206	0.0219325
ENSG00000012817	KDM5D	lysine demethylase 5D	8284	0	0	0	0	0	1	0	0	0	0	0	0.112688
ENSG00000012822	CALCOCO1	calcium binding and coiled-coil domain 1	57658	318	271	197	236	176	26	7.86605	6.85371	4.90553	7.5702	4.33329	3.11592	0.0899902	-0.473764	-0.988789	0.873269	0.0898507	0.0453449	0.640747	0.0240262	0.00212639
ENSG00000012963	UBR7	ubiquitin protein ligase E3 component n-recognin 7	55148	463	381	398	384	245	93	29.0415	24.4338	25.1311	31.2346	15.2961	28.2622	0.13156	-0.657328	0.18826	0.778002	0.00901479	0.732576	0.477469	0.00103998	0.411384
ENSG00000012983	MAP4K5	mitogen-activated protein kinase kinase kinase kinase 5	11183	55	45	57	37	35	14	1.58866	1.32894	1.65742	1.38591	1.00626	1.9592	-0.260793	-0.481145	0.437801	0.747952	0.319411	0.679826	0.437486	0.151179	0.347224
ENSG00000013016	EHD3	EH domain containing 3	30845	0	0	0	0	0	0	0	0	0	0	0	0
ENSG00000013275	PSMC4	proteasome 26S subunit, ATPase 4	5704	4177	4149	3765	3132	3737	723	360.534	366.144	327.143	350.566	321.056	302.346	-0.126105	-0.0121712	-0.138589	0.774899	1	0.75533	0.471983	0.959236	0.446134
ENSG00000013288	MAN2B2	mannosidase alpha class 2B member 2	23324	545	485	410	465	476	95	13.5024	12.2852	10.2256	14.9394	11.738	11.4031	0.193984	0.0868834	0.00533175	0.607164	0.80286	1	0.281437	0.634136	0.965666
ENSG00000013293	SLC7A14	solute carrier family 7 member 14	57709	0	0	0	0	1	0	0	0	0	0	0.0208725	0
ENSG00000013297	CLDN11	claudin 11	5010	0	1	0	0	2	0	0	0.0602986	0	0	0.117405	0
ENSG00000013306	SLC25A39	solute carrier family 25 member 39	51629	7794	8079	7486	6035	7403	1325	486.519	515.613	470.414	488.521	459.963	400.719	-0.130769	0.023126	-0.215597	0.75896	0.95703	0.555222	0.451722	0.875583	0.221755
ENSG00000013364	MVP	major vault protein	9961	2264	2516	2085	2088	2311	441	81.1445	92.1977	75.228	97.0464	82.4439	76.5783	0.103893	0.10943	-0.0368387	0.811277	0.706274	0.989918	0.5292	0.507224	0.858259
ENSG00000013374	NUB1	negative regulator of ubiquitin like proteins 1	51667	565	548	645	482	647	111	22.9823	22.7904	26.4116	25.4248	26.1954	21.8752	-0.0447932	0.239023	-0.0607291	0.967495	0.353609	0.96343	0.833649	0.176379	0.804532
ENSG00000013375	PGM3	phosphoglucomutase 3	5238	161	171	167	165	131	44	4.73874	5.14587	4.94816	6.29776	3.83781	6.27442	0.225147	-0.248241	0.420608	0.615344	0.482105	0.462708	0.291454	0.279891	0.154001
ENSG00000013392	RWDD2A	RWD domain containing 2A	112611	92	68	78	38	77	10	5.37259	4.06005	4.58544	2.8777	4.47571	2.82931	-0.820148	0.055952	-0.643826	0.0836538	0.931528	0.540818	0.00724929	0.829726	0.210692
ENSG00000013441	CLK1	CDC like kinase 1	1195	104	75	92	78	71	30	4.42756	3.26452	3.94284	4.30618	3.00861	6.18781	0.0282847	-0.247808	0.75133	1	0.581298	0.217951	0.929409	0.372335	0.0334425
ENSG00000013503	POLR3B	RNA polymerase III subunit B	55703	146	120	112	124	117	33	6.73967	5.66361	5.20468	7.42289	5.37585	7.38047	0.216635	-0.00783967	0.409129	0.657306	1	0.544317	0.335583	1	0.214369
ENSG00000013523	ANGEL1	angel homolog 1	23357	566	546	412	584	326	102	19.5691	19.3008	14.3398	26.1839	11.2189	17.086	0.440003	-0.541691	0.0252241	0.118324	0.0306301	1	0.0132473	0.00521551	0.895682
ENSG00000013561	RNF14	ring finger protein 14	9604	277	206	232	186	165	61	12.2229	9.29372	10.3056	10.6433	7.24695	13.041	-0.116648	-0.430142	0.377177	0.857311	0.14231	0.442293	0.609231	0.0456969	0.14229
ENSG00000013563	DNASE1L1	deoxyribonuclease 1 like 1	1774	212	210	218	161	194	21	11.2927	11.4369	11.6898	11.1212	10.2858	5.41957	-0.168466	-0.040413	-1.00358	0.765685	0.954712	0.0644107	0.461712	0.870513	0.00377773
ENSG00000013573	DDX11	DEAD/H-box helicase 11	1663	926	918	739	852	776	180	24.3592	24.69	19.5698	29.0642	20.3184	22.9408	0.22308	-0.0525365	0.0827711	0.509052	0.904318	0.895335	0.196527	0.785858	0.671439
ENSG00000013583	HEBP1	heme binding protein 1	50865	436	455	473	268	390	71	27.9942	29.8689	30.5726	22.3142	24.9242	22.0863	-0.525862	-0.125624	-0.339722	0.0857232	0.712983	0.489298	0.00758739	0.516524	0.175495
ENSG00000013588	GPRC5A	G protein-coupled receptor class C group 5 member A	9052	5437	4902	4183	6310	3962	888	141.788	130.701	109.814	213.39	102.842	112.196	0.622239	-0.190012	-0.104222	0.00650925	0.475079	0.830521	0.000123489	0.274035	0.565941
ENSG00000013619	MAMLD1	mastermind like domain containing 1	10046	94	83	62	63	55	7	3.47256	3.13492	2.3057	3.01806	2.02237	1.25286	-0.0989937	-0.435129	-1.16304	0.923206	0.277554	0.225082	0.738318	0.122665	0.0359075
ENSG00000013725	CD6	CD6 molecule	923	0	0	1	0	0	0	0	0	0.0371888	0	0	0
ENSG00000013810	TACC3	transforming acidic coiled-coil containing protein 3	10460	3071	3163	2899	2332	3027	499	82.4104	86.7817	78.3142	81.1515	80.8519	64.8764	-0.147543	0.0879092	-0.269459	0.714971	0.771579	0.444031	0.401171	0.589998	0.143432
ENSG00000014123	UFL1	UFM1 specific ligase 1	23376	53	24	26	58	22	10	2.57003	1.18987	1.26919	3.64717	1.06184	2.34934	0.995643	-0.538614	0.562724	0.0227784	0.339672	0.63296	0.000887607	0.166296	0.296396
ENSG00000014138	POLA2	DNA polymerase alpha 2, accessory subunit	23649	232	203	276	131	426	46	9.17088	8.20437	10.983	6.71522	16.7613	8.80977	-0.616896	0.942738	-0.0246321	0.0663406	1.31103e-05	1	0.0048437	2.74117e-07	0.970077
ENSG00000014164	ZC3H3	zinc finger CCCH-type containing 3	23144	575	497	432	601	262	76	34.0118	30.057	25.7239	46.1002	15.4255	21.7801	0.501698	-0.836561	-0.378819	0.06388	0.00054376	0.410227	0.00455737	2.66976e-05	0.118958
ENSG00000014216	CAPN1	calpain 1	823	7355	7077	6177	6807	3959	1008	214.331	210.852	181.205	257.231	114.832	142.314	0.225249	-0.697472	-0.427728	0.470909	0.00122476	0.150061	0.1687	7.6668e-05	0.0164195
ENSG00000014257	ACP3	acid phosphatase 3	55	2	3	5	3	4	0	0.102851	0.157734	0.258844	0.200062	0.204745	0
ENSG00000014641	MDH1	malate dehydrogenase 1	4190	1143	1156	1150	642	986	222	50.4159	52.1322	51.0634	36.7217	43.2886	47.4415	-0.603449	-0.125363	-0.0330115	0.0253949	0.69149	0.999301	0.00105686	0.490879	0.887689
ENSG00000014824	SLC30A9	solute carrier family 30 member 9	10463	139	130	186	133	192	28	4.24976	4.06368	5.7247	5.27312	5.84287	4.14755	0.0476347	0.436181	-0.0976176	0.975672	0.115613	0.980196	0.852361	0.0342513	0.83794
ENSG00000014914	MTMR11	myotubularin related protein 11	10903	83	78	79	94	53	12	3.99571	3.83917	3.82854	5.86826	2.53961	2.79886	0.470249	-0.495686	-0.395305	0.257893	0.21091	0.764355	0.0518714	0.08149	0.456576
ENSG00000014919	COX15	cytochrome c oxidase assembly homolog COX15	1355	981	913	1009	684	1156	189	51.6924	49.1875	53.5228	46.739	60.6305	48.2507	-0.262508	0.353627	-0.0156226	0.445506	0.124133	1	0.151805	0.0378443	0.962108
ENSG00000015133	CCDC88C	coiled-coil domain containing 88C	440193	171	170	154	182	142	25	3.02891	3.07869	2.74601	4.1805	2.50354	2.14543	0.379118	-0.11943	-0.381613	0.296884	0.777513	0.635467	0.0691539	0.598674	0.298526
ENSG00000015153	YAF2	YY1 associated factor 2	10138	23	27	26	23	25	5	0.467047	0.560561	0.531492	0.605657	0.505299	0.491911	0.097587	0.0771298	-0.00102643	0.977963	0.995166	1	0.85637	0.938573	1
ENSG00000015171	ZMYND11	zinc finger MYND-type containing 11	10771	116	119	121	163	106	48	4.8173	5.05266	5.0585	8.77808	4.38155	9.65765	0.694693	-0.0662977	1.03309	0.026878	0.938284	0.0172418	0.00115807	0.841352	0.000480282
ENSG00000015285	WAS	WASP actin nucleation promoting factor	7454	10	5	4	4	5	0	0.924406	0.472562	0.372231	0.4795	0.460053	0
ENSG00000015413	DPEP1	dipeptidase 1	1800	8	4	4	10	8	0	0.643335	0.328877	0.323815	1.04283	0.640343	0	1.12689	0.670313	-5.13298	0.341038	0.679035	0.658781	0.09026	0.478363	0.324814
ENSG00000015475	BID	BH3 interacting domain death agonist	637	645	656	657	465	886	148	31.931	33.2034	32.7422	29.8519	43.6578	35.4975	-0.252071	0.537005	0.198728	0.490055	0.0139522	0.66815	0.181591	0.00184631	0.333584
ENSG00000015479	MATR3	matrin 3	9782	7	2	6	6	9	7	0.127711	0.0373067	0.110198	0.141954	0.163436	0.618746	0.491178	0.928756	2.78879	0.805637	0.453519	0.0250231	0.521247	0.255722	0.000840857
ENSG00000015520	NPC1L1	NPC1 like intracellular cholesterol transporter 1	29881	3	10	4	2	8	0	0.125724	0.428473	0.168751	0.108691	0.333705	0
ENSG00000015532	XYLT2	xylosyltransferase 2	64132	669	640	646	569	677	107	26.9093	26.3198	26.1577	29.6793	27.1044	20.8518	0.0422254	0.152074	-0.265983	0.955084	0.59253	0.569614	0.804134	0.383779	0.238348
ENSG00000015568	RGPD5	RANBP2 like and GRIP domain containing 5	84220	7	8	5	10	4	1	0.108615	0.126914	0.0781004	0.201214	0.0617772	0.0751756	0.81108	-0.624687	-0.385862	0.547461	0.706483	1	0.227553	0.508194	1
ENSG00000015592	STMN4	stathmin 4	81551	0	0	0	0	2	0	0	0	0	0	0.133016	0
ENSG00000015676	NUDCD3	NudC domain containing 3	23386	1931	1811	1614	1714	1416	332	42.9612	41.1945	36.1483	49.4505	31.3569	35.7862	0.180003	-0.236371	-0.0855583	0.607268	0.361663	0.894246	0.282034	0.182281	0.664934
ENSG00000016082	ISL1	ISL LIM homeobox 1	3670	10	7	12	7	3	1	0.781331	0.55919	0.943858	0.70925	0.233309	0.378546	-0.223953	-1.55329	-0.911331	0.987028	0.168691	0.986681	0.882325	0.0589459	0.852358
ENSG00000016391	CHDH	choline dehydrogenase	55349	356	280	288	278	258	44	10.0624	8.09164	8.19473	10.1897	7.2585	6.02544	0.092859	-0.155608	-0.463803	0.871212	0.64477	0.38686	0.63563	0.440365	0.106109
ENSG00000016402	IL20RA	interleukin 20 receptor subunit alpha	53832	17	23	11	9	11	3	0.791061	1.09425	0.515281	0.543087	0.509482	0.676342	-0.673317	-0.526485	-0.160756	0.546206	0.625502	1	0.2264	0.418675	1
ENSG00000016490	CLCA1	chloride channel accessory 1	1179	0	5	0	0	1	1	0	0.336878	0	0	0.065592	0.319271
ENSG00000016602	CLCA4	chloride channel accessory 4	22802	0	0	2	0	0	0	0	0	0.128559	0	0	0
ENSG00000016864	GLT8D1	glycosyltransferase 8 domain containing 1	55830	425	432	440	326	472	61	24.7272	25.6978	25.7708	24.5963	27.334	17.1949	-0.170203	0.222738	-0.485509	0.703705	0.409198	0.286644	0.386168	0.21974	0.0591821
ENSG00000017260	ATP2C1	ATPase secretory pathway Ca2+ transporting 1	27032	341	264	304	261	182	77	8.79579	6.96227	7.89376	8.73025	4.67269	9.62266	0.0251736	-0.63545	0.366429	0.993989	0.0172334	0.429885	0.896316	0.00241866	0.133397
ENSG00000017427	IGF1	insulin like growth factor 1	3479	0	0	0	0	0	0	0	0	0	0	0	0
ENSG00000017483	SLC38A5	solute carrier family 38 member 5	92745	1276	1192	1245	814	751	163	69.8977	66.7598	68.6549	57.8232	40.9475	43.2597	-0.36631	-0.623348	-0.583889	0.233619	0.00628699	0.0735706	0.0427444	0.000655577	0.00466881
ENSG00000017797	RALBP1	ralA binding protein 1	10928	545	507	448	542	438	101	14.9179	14.1888	12.3447	19.2388	11.9333	13.3942	0.355225	-0.0928896	0.0338898	0.245167	0.806654	0.993159	0.0468531	0.639463	0.870761
ENSG00000018189	RUFY3	RUN and FYVE domain containing 3	22902	81	54	97	55	108	13	1.89561	1.29206	2.28521	1.66914	2.51572	1.47398	-0.251795	0.579627	-0.230141	0.733468	0.0671175	0.913723	0.421994	0.0157976	0.705221
ENSG00000018236	CNTN1	contactin 1	1272	6	4	4	3	1	1	0.176269	0.120146	0.118297	0.114291	0.0292415	0.142334
ENSG00000018280	SLC11A1	solute carrier family 11 member 1	6556	3	5	8	2	11	1	0.0761068	0.129688	0.204307	0.0657958	0.277761	0.12291	-1.1347	1.12277	-0.0726264	0.65923	0.269226	1	0.338588	0.117384	1
ENSG00000018408	WWTR1	WW domain containing transcription regulator 1	25937	287	272	252	306	316	69	7.5085	7.27556	6.63685	10.3815	8.22875	8.74589	0.417049	0.322621	0.370702	0.187931	0.224602	0.437464	0.0289648	0.0896157	0.139188
ENSG00000018510	AGPS	alkylglycerone phosphate synthase	8540	178	159	199	158	137	50	4.42689	4.04299	4.98221	5.09567	3.39137	6.02466	0.0607036	-0.285636	0.502982	0.936953	0.386049	0.326376	0.766725	0.200297	0.0765031
ENSG00000018607	ZNF285CP	zinc finger protein 285C, pseudogene		0	0	0	0	0	0	0	0	0	0	0	0
ENSG00000018610	STEEP1	STING1 ER exit protein 1	63932	356	351	389	245	293	70	30.3705	30.6151	33.4074	27.1041	24.8797	28.9324	-0.339129	-0.221921	-0.0440691	0.342607	0.461379	1	0.091123	0.262126	0.895641
ENSG00000018625	ATP1A2	ATPase Na+/K+ transporting subunit alpha 2	477	0	0	0	0	0	0	0	0	0	0	0	0
ENSG00000018699	TTC27	tetratricopeptide repeat domain 27	55622	162	195	168	105	145	26	10.3562	12.7452	10.8115	8.70443	9.22632	8.05272	-0.500738	-0.176241	-0.412031	0.199824	0.653919	0.573712	0.0323692	0.449959	0.241996
ENSG00000018869	ZNF582	zinc finger protein 582	147948	0	0	0	0	0	0	0	0	0	0	0	0
ENSG00000019102	VSIG2	V-set and immunoglobulin domain containing 2	23584	1	0	0	0	1	0	0.152109	0	0	0	0.151401	0
ENSG00000019144	PHLDB1	pleckstrin homology like domain family B member 1	23187	930	769	691	720	666	117	9.42638	7.96921	7.05067	9.46369	6.71911	5.74556	0.0949718	-0.15832	-0.423874	0.844291	0.603038	0.271568	0.584965	0.395097	0.0528623
ENSG00000019169	MARCO	macrophage receptor with collagenous structure	8685	0	0	2	2	2	0	0	0	0.213151	0.274577	0.210753	0
ENSG00000019186	CYP24A1	cytochrome P450 family 24 subfamily A member 1	1591	498	500	459	584	240	105	27.485	28.2139	25.5017	41.797	13.1842	28.0763	0.503468	-0.919874	0.130494	0.0634702	0.000136979	0.819428	0.00451118	4.91369e-06	0.547052
ENSG00000019485	PRDM11	PR/SET domain 11	56981	233	245	201	184	189	28	3.67888	3.95505	3.19481	3.76741	2.97027	2.14191	-0.0612735	-0.163391	-0.674392	0.94596	0.655622	0.22989	0.786976	0.452092	0.0373321
ENSG00000019505	SYT13	synaptotagmin 13	57586	41	38	33	17	26	6	1.65733	1.57049	1.34285	0.891126	1.0461	1.17506	-0.892085	-0.422599	-0.294987	0.199406	0.442356	0.928229	0.0322486	0.246412	0.73012
ENSG00000019549	SNAI2	snail family transcriptional repressor 2	6591	4	2	4	1	2	3	0.268334	0.137174	0.270126	0.0869925	0.133543	0.975037	-1.40287	-0.610074	2.13765	0.714971	0.9045	0.270572	0.401855	0.78706	0.0525058
ENSG00000019582	CD74	CD74 molecule	972	12	6	2	5	11	0	0.552555	0.28247	0.0927074	0.298559	0.504153	0	-0.172013	0.809295	-5.44615	1	0.474838	0.479967	1	0.273797	0.16812
ENSG00000019991	HGF	hepatocyte growth factor	3082	0	0	0	0	0	0	0	0	0	0	0	0
ENSG00000019995	ZRANB1	zinc finger RANBP2-type containing 1	54764	409	321	419	296	346	96	15.0211	12.0534	15.4911	14.0973	12.6482	17.0818	-0.131956	-0.047671	0.345911	0.799262	0.931528	0.422191	0.510768	0.829626	0.128942
ENSG00000020129	NCDN	neurochondrin	23154	1026	863	711	1086	571	143	45.9271	39.4966	32.0392	63.0402	25.441	31.0129	0.566493	-0.501668	-0.255792	0.022541	0.0370385	0.566676	0.000858273	0.00679658	0.236172
ENSG00000020181	ADGRA2	adhesion G protein-coupled receptor A2	25960	127	95	89	123	82	12	3.94591	3.01782	2.78371	4.95581	2.5359	1.80638	0.486924	-0.23806	-0.766049	0.200884	0.559188	0.352078	0.0325817	0.351242	0.0886899
ENSG00000020219	CCT8L1P	chaperonin containing TCP1 subunit 8 like 1, pseudogene	155100	0	0	0	0	0	0	0	0	0	0	0	0
ENSG00000020256	ZFP64	ZFP64 zinc finger protein	55734	287	278	211	233	167	40	9.30324	9.21348	6.88533	9.79431	5.38821	6.28198	0.0879877	-0.532993	-0.351456	0.886127	0.055732	0.576433	0.66498	0.0120064	0.244089
ENSG00000020426	MNAT1	MNAT1 component of CDK activating kinase	4331	62	54	61	36	99	15	3.5198	3.13434	3.48615	2.6503	5.59419	4.12574	-0.472929	0.843036	0.364481	0.42635	0.00605825	0.727066	0.140009	0.000624441	0.39956
ENSG00000020577	SAMD4A	sterile alpha motif domain containing 4A	23034	41	26	28	41	28	11	0.741507	0.480763	0.509776	0.961571	0.50404	0.963847	0.610655	-0.0780345	0.814038	0.284333	0.955913	0.419088	0.0624624	0.873727	0.125362
ENSG00000020633	RUNX3	RUNX family transcription factor 3	864	694	643	578	626	490	94	33.7719	31.9914	28.3148	39.5035	23.7338	22.1619	0.210774	-0.283363	-0.421965	0.551474	0.291616	0.308016	0.230456	0.131962	0.0688046
ENSG00000020922	MRE11	MRE11 homolog, double strand break repair nuclease	4361	28	18	21	17	36	3	0.801512	0.526807	0.605148	0.631055	1.02572	0.416061	-0.153259	0.783963	-0.549475	0.949125	0.093991	0.874088	0.792756	0.0256429	0.633585
ENSG00000021300	PLEKHB1	pleckstrin homology domain containing B1	58473	575	542	517	413	512	100	25.6554	24.725	23.2216	23.8961	22.7382	21.617	-0.160771	0.00832976	-0.104391	0.718718	1	0.898678	0.406841	0.960958	0.675068
ENSG00000021355	SERPINB1	serpin family B member 1	1992	289	248	376	237	372	61	20.876	18.3159	27.3418	22.2006	26.7466	21.3483	-0.122959	0.386401	0.0215002	0.825459	0.124079	1	0.551341	0.0377957	0.947354
ENSG00000021461	CYP3A43	cytochrome P450 family 3 subfamily A member 43	64816	0	0	0	0	0	0	0	0	0	0	0	0
ENSG00000021488	SLC7A9	solute carrier family 7 member 9	11136	2	1	7	0	2	0	0.169439	0.0866183	0.596996	0	0.168651	0
ENSG00000021574	SPAST	spastin	6683	40	34	51	43	25	23	0.927718	0.806234	1.19074	1.29327	0.577127	2.58445	0.282762	-0.637259	1.47992	0.718691	0.194716	0.013106	0.406586	0.0728238	0.000315175
ENSG00000021645	NRXN3	neurexin 3	9369	0	0	0	0	0	0	0	0	0	0	0	0
ENSG00000021762	OSBPL5	oxysterol binding protein like 5	114879	377	418	315	373	293	60	11.1037	12.5872	9.33959	14.2463	8.58954	8.56175	0.248366	-0.240598	-0.285031	0.493375	0.413608	0.610539	0.183343	0.223262	0.274551
ENSG00000021776	AQR	aquarius intron-binding spliceosomal factor	9716	205	205	173	178	152	40	3.35944	3.43474	2.85397	3.78268	2.47932	3.17583	0.1113	-0.257109	0.0600499	0.851585	0.441513	0.975099	0.595598	0.245708	0.826782
ENSG00000021826	CPS1	carbamoyl-phosphate synthase 1	1373	162	173	164	106	113	34	3.28207	3.58348	3.34477	2.78486	2.27869	3.3373	-0.412698	-0.461256	0.0489577	0.325276	0.140016	0.995714	0.0813081	0.0447688	0.879846
ENSG00000021852	C8B	complement C8 beta chain	732	0	0	0	0	0	0	0	0	0	0	0	0
ENSG00000022267	FHL1	four and a half LIM domains 1	2273	144	122	126	156	121	36	5.40678	4.68341	4.76252	7.59568	4.52207	6.54882	0.494533	-0.0124362	0.481513	0.160029	1	0.427176	0.0221924	0.989054	0.131335
ENSG00000022277	RTF2	replication termination factor 2	51507	813	778	776	540	841	163	44.0419	43.0905	42.3182	37.9345	45.3468	42.7806	-0.30903	0.189172	0.0653439	0.354384	0.475754	0.934638	0.0965783	0.274711	0.744051
ENSG00000022355	GABRA1	gamma-aminobutyric acid type A receptor subunit alpha1	2554	0	0	0	0	0	0	0	0	0	0	0	0
ENSG00000022556	NLRP2	NLR family pyrin domain containing 2	55655	1745	1570	1347	1275	964	213	60.8389	55.9645	47.2764	57.6451	33.4533	35.9791	-0.0457148	-0.58991	-0.524696	0.958644	0.0092455	0.103651	0.81041	0.00107957	0.00850946
ENSG00000022567	SLC45A4	solute carrier family 45 member 4	57210	288	288	306	271	245	54	7.36397	7.52903	7.87647	8.98576	6.23536	6.68956	0.119611	-0.166632	-0.105011	0.819543	0.628323	0.917394	0.543311	0.421484	0.710873
ENSG00000022840	RNF10	ring finger protein 10	9921	1240	1249	1125	1102	822	205	46.2585	47.6386	42.2487	53.3111	30.5223	37.0517	0.109004	-0.454701	-0.214852	0.804503	0.0564993	0.625395	0.518938	0.012266	0.288634
ENSG00000022976	ZNF839	zinc finger protein 839	55778	189	173	180	165	242	37	7.4417	6.96439	7.13466	8.42481	9.48421	7.05823	0.107518	0.518968	0.0532091	0.866649	0.0457487	0.989918	0.627264	0.00909779	0.858617
ENSG00000023041	ZDHHC6	zinc finger DHHC-type palmitoyltransferase 6	64429	385	304	337	282	435	65	22.6091	18.2525	19.9224	21.4752	25.4265	18.4935	-0.0378864	0.446418	-0.0525289	0.980738	0.0639557	0.991417	0.867151	0.014594	0.863097
ENSG00000023171	GRAMD1B	GRAM domain containing 1B	57476	122	92	95	139	134	34	1.79686	1.38538	1.40854	2.65482	1.96442	2.42615	0.672111	0.478576	0.742961	0.0422512	0.107501	0.180982	0.00237363	0.0309173	0.0233513
ENSG00000023191	RNH1	ribonuclease/angiogenin inhibitor 1	6050	2736	2694	2484	2203	2299	403	81.6648	82.2135	74.6381	85.2706	68.302	58.2784	-0.0221732	-0.101491	-0.370236	1	0.754871	0.25862	0.913854	0.567715	0.0474815
ENSG00000023228	NDUFS1	NADH:ubiquinone oxidoreductase core subunit S1	4719	639	588	498	530	379	131	11.5529	10.8691	9.06376	12.426	6.8203	11.4748	0.121716	-0.502778	0.207795	0.789299	0.0440584	0.656374	0.495578	0.00864982	0.317864
ENSG00000023287	RB1CC1	RB1 inducible coiled-coil 1	9821	59	24	35	77	20	27	1.70576	0.709421	1.01865	2.88684	0.575535	3.78193	1.20863	-0.870502	1.79788	0.00111099	0.0912868	0.000679345	1.02116e-05	0.0245871	5.99022e-06
ENSG00000023318	ERP44	endoplasmic reticulum protein 44	23071	146	162	152	113	180	30	6.6836	7.58227	7.00473	6.70814	8.20173	6.65369	-0.203576	0.326812	-0.0145038	0.704045	0.273464	1	0.387032	0.119884	1
ENSG00000023330	ALAS1	5'-aminolevulinate synthase 1	211	1038	1007	834	892	634	171	90.0887	89.357	72.8667	100.393	54.7693	71.904	0.133029	-0.500294	-0.147445	0.747952	0.0357995	0.778294	0.437628	0.00651661	0.485745
ENSG00000023445	BIRC3	baculoviral IAP repeat containing 3	330	5	7	8	11	10	4	0.146383	0.209529	0.235776	0.417617	0.291404	0.567367	0.94679	0.671696	1.581	0.432323	0.615698	0.354481	0.143472	0.408326	0.0905737
ENSG00000023516	AKAP11	A-kinase anchoring protein 11	11215	99	76	60	98	40	31	2.19768	1.72492	1.34082	2.82112	0.883822	3.33407	0.562976	-0.867955	1.00432	0.154165	0.0208987	0.0687055	0.0206172	0.00309083	0.00413449
ENSG00000023572	GLRX2	glutaredoxin 2	51022	99	75	84	56	90	20	3.50886	2.7178	2.99709	2.57386	3.17503	3.43435	-0.378365	0.164391	0.237687	0.498144	0.690852	0.827115	0.187329	0.490196	0.560305
ENSG00000023608	SNAPC1	small nuclear RNA activating complex polypeptide 1	6617	22	14	16	22	36	12	1.86742	1.21499	1.36719	2.42163	3.04157	4.93497	0.579667	1.14708	1.80205	0.467727	0.011742	0.0376298	0.166082	0.0014834	0.00156854
ENSG00000023697	DERA	deoxyribose-phosphate aldolase	51071	224	190	201	108	189	42	17.5267	15.1996	15.8321	10.9583	14.7194	15.9216	-0.684659	-0.018707	0.0547052	0.0444996	1	0.979135	0.00258318	0.968801	0.833042
ENSG00000023734	STRAP	serine/threonine kinase receptor associated protein	11171	1652	1549	1591	1173	1259	309	164.157	157.372	159.151	151.151	124.523	148.762	-0.207263	-0.246043	-0.0292711	0.569111	0.34008	1	0.245508	0.166587	0.897197
ENSG00000023839	ABCC2	ATP binding cassette subfamily C member 2	1244	1028	892	810	749	591	173	28.8712	25.6132	22.9006	27.2785	16.521	23.5398	-0.0408001	-0.523384	-0.0524594	0.971677	0.0282228	0.974359	0.84201	0.00467929	0.824463
ENSG00000023892	DEF6	DEF6 guanine nucleotide exchange factor	50619	693	646	605	477	714	115	59.1431	56.3676	51.9776	52.7904	60.6519	47.5502	-0.203275	0.237715	-0.153104	0.605837	0.348669	0.786924	0.280032	0.172448	0.49786
ENSG00000023902	PLEKHO1	pleckstrin homology domain containing O1	51177	137	127	139	45	116	10	4.54878	4.31126	4.646	1.93755	3.83361	1.60864	-1.33754	-0.114294	-1.4043	0.000181331	0.81478	0.0414594	1.00537e-06	0.650572	0.00180436
ENSG00000023909	GCLM	glutamate-cysteine ligase modifier subunit	2730	136	117	108	170	108	37	5.51672	4.85238	4.41018	8.94246	4.36055	7.27157	0.737307	-0.0573698	0.639852	0.0154857	0.955089	0.24801	0.000486389	0.871702	0.0438374
ENSG00000024048	UBR2	ubiquitin protein ligase E3 component n-recognin 2	23304	139	126	115	135	107	40	3.46086	3.2075	2.88242	4.35882	2.65173	4.82518	0.330538	-0.145213	0.677817	0.420855	0.76573	0.20361	0.136444	0.582916	0.0292834
ENSG00000024422	EHD2	EH domain containing 2	30846	2704	2511	2140	2552	1745	357	154.827	146.998	123.351	189.49	99.4511	99.0355	0.29709	-0.392132	-0.437964	0.30756	0.0952511	0.169298	0.0732228	0.026132	0.0202434
ENSG00000024526	DEPDC1	DEP domain containing 1	55635	188	70	198	179	90	42	7.00864	2.66809	7.43072	8.65355	3.33959	7.58593	0.479321	-0.652458	0.490275	0.160565	0.0365521	0.382452	0.0223203	0.00668535	0.104007
ENSG00000024862	CCDC28A	coiled-coil domain containing 28A	25901	72	59	65	37	91	9	10.5158	8.81023	9.5568	7.00771	13.229	6.36847	-0.579781	0.575358	-0.51671	0.27702	0.0854132	0.701104	0.0600322	0.0222633	0.36797
ENSG00000025039	RRAGD	Ras related GTP binding D	58528	147	127	125	79	131	31	6.35031	5.60929	5.43598	4.42559	5.6328	6.48819	-0.511663	0.0764491	0.240423	0.221432	0.86819	0.768228	0.038827	0.7289	0.464819
ENSG00000025156	HSF2	heat shock transcription factor 2	3298	139	152	129	137	103	40	11.3437	12.6827	10.5979	14.4986	8.36669	15.8156	0.205624	-0.346234	0.531732	0.66191	0.325336	0.335053	0.3421	0.155518	0.079972
ENSG00000025293	PHF20	PHD finger protein 20	51230	237	219	245	212	278	49	6.23076	5.88659	6.48409	7.22761	7.27467	6.24127	0.0976389	0.347685	0.0869554	0.861115	0.194468	0.944032	0.616843	0.07263	0.760587
ENSG00000025423	HSD17B6	hydroxysteroid 17-beta dehydrogenase 6	8630	17	25	15	5	7	3	1.64688	2.47617	1.46283	0.62813	0.674974	1.40805	-1.66714	-1.32953	-0.320242	0.0924189	0.112532	0.98081	0.00868616	0.0328726	0.839945
ENSG00000025434	NR1H3	nuclear receptor subfamily 1 group H member 3	10062	464	433	402	339	460	83	22.5247	21.4909	19.6452	21.3406	22.2266	19.521	-0.114366	0.185037	-0.0419577	0.836377	0.508965	1	0.567952	0.303067	0.897984
ENSG00000025708	TYMP	thymidine phosphorylase	1890	282	438	320	222	295	42	17.2412	27.3792	19.6952	17.601	17.9522	12.4409	-0.41062	-0.141446	-0.709953	0.233337	0.678599	0.122017	0.0425523	0.477437	0.0116149
ENSG00000025770	NCAPH2	non-SMC condensin II complex subunit H2	29781	2161	2232	2093	1879	2143	365	106.669	112.643	104.003	120.276	105.289	87.2894	0.0344744	0.0832797	-0.226971	0.96435	0.786191	0.564008	0.826717	0.611937	0.230049
ENSG00000025772	TOMM34	translocase of outer mitochondrial membrane 34	10953	1836	1948	1616	1365	1486	289	204.818	222.183	181.479	197.467	165.002	156.198	-0.162167	-0.180492	-0.299379	0.681739	0.515372	0.411006	0.362501	0.308982	0.120399
ENSG00000025796	SEC63	SEC63 homolog, protein translocation regulator	11231	166	140	151	157	120	36	4.2455	3.66079	3.88766	5.20698	3.05476	4.46074	0.282579	-0.245567	0.260389	0.498785	0.488424	0.728444	0.187937	0.285681	0.404868
ENSG00000025800	KPNA6	karyopherin subunit alpha 6	23633	1048	865	786	901	661	171	30.9328	26.1036	23.3545	34.4865	19.4194	24.4533	0.243083	-0.344565	-0.051875	0.455927	0.173224	0.975099	0.157884	0.0610855	0.825859
ENSG00000026025	VIM	vimentin	7431	34	52	33	58	25	15	1.44579	2.26078	1.41264	3.19832	1.05814	3.09032	0.782357	-0.568422	0.933069	0.0805381	0.267422	0.286849	0.00677258	0.115954	0.0593526
ENSG00000026036	RTEL1-TNFRSF6B	RTEL1-TNFRSF6B readthrough (NMD candidate)	100533107	9	14	6	7	10	0	0.21785	0.346473	0.146203	0.219725	0.24093	0	-0.22472	0.143924	-5.97366	0.987028	0.934533	0.244061	0.882325	0.835445	0.0425681
ENSG00000026103	FAS	Fas cell surface death receptor	355	67	45	68	46	48	14	2.64374	1.81544	2.70111	2.35379	1.88521	2.67643	-0.143319	-0.222594	0.242097	0.893079	0.707685	0.841842	0.678668	0.509786	0.583845
ENSG00000026297	RNASET2	ribonuclease T2	8635	279	265	291	161	383	55	8.03456	7.80244	8.4361	6.01243	10.9782	7.6737	-0.551669	0.557231	0.000990302	0.0960032	0.018779	1	0.00921554	0.00270709	0.994268
ENSG00000026508	CD44	CD44 molecule (IN blood group)	960	6018	6062	5433	4844	3787	1009	132.404	136.361	120.331	138.203	82.9314	107.553	-0.031695	-0.527684	-0.192432	0.980698	0.018057	0.616533	0.866971	0.0025644	0.280192
ENSG00000026559	KCNG1	potassium voltage-gated channel modifier subfamily G member 1	3755	276	288	274	310	320	59	11.2184	11.9686	11.2115	16.34	12.9464	11.6188	0.387131	0.292113	0.0962863	0.227204	0.279463	0.926171	0.0406903	0.124125	0.72547
ENSG00000026652	AGPAT4	1-acylglycerol-3-phosphate O-acyltransferase 4	56895	97	63	54	43	83	11	1.49792	0.994679	0.83946	0.861093	1.27576	0.822986	-0.487449	0.318897	-0.351933	0.367327	0.393785	0.824699	0.104162	0.207336	0.557732
ENSG00000026751	SLAMF7	SLAM family member 7	57823	10	1	5	4	8	2	0.455413	0.046562	0.229227	0.236228	0.362636	0.441285	-0.170958	0.671008	0.907511	1	0.679035	0.7738	1	0.478363	0.476806
ENSG00000026950	BTN3A1	butyrophilin subfamily 3 member A1	11119	91	102	90	76	53	11	3.61603	4.14398	3.60017	3.91625	2.09624	2.11771	-0.0747082	-0.73439	-0.759123	0.955765	0.0395449	0.383615	0.805218	0.00741406	0.104578
ENSG00000027001	MIPEP	mitochondrial intermediate peptidase	4285	181	163	248	154	126	34	11.7586	10.8266	16.2189	12.9737	8.1475	10.7014	-0.120383	-0.550399	-0.197091	0.861371	0.0617956	0.823792	0.617774	0.0139309	0.552771
ENSG00000027075	PRKCH	protein kinase C eta	5583	124	103	111	82	97	19	3.09089	2.62497	2.78532	2.65058	2.40663	2.29456	-0.218791	-0.117423	-0.225817	0.713081	0.820206	0.877026	0.39798	0.656767	0.637997
ENSG00000027644	INSRR	insulin receptor related receptor	3645	0	0	0	0	0	0	0	0	0	0	0	0
ENSG00000027697	IFNGR1	interferon gamma receptor 1	3459	150	121	126	89	120	19	10.0748	8.30917	8.51935	7.75178	8.02236	6.18277	-0.332116	-0.0421433	-0.457121	0.484938	0.961031	0.573712	0.177529	0.882084	0.242109
ENSG00000027847	B4GALT7	beta-1,4-galactosyltransferase 7	11285	421	444	390	349	655	66	18.996	20.4828	17.7148	20.4207	29.4169	14.4281	-0.0244047	0.742821	-0.324434	1	0.000481927	0.532224	0.922732	2.28247e-05	0.202775
ENSG00000027869	SH2D2A	SH2 domain containing 2A	9047	75	79	67	58	97	18	6.57149	7.07711	5.90973	6.59016	8.45959	7.64115	-0.107078	0.49308	0.306615	0.93588	0.132695	0.768218	0.764303	0.0415794	0.462842
ENSG00000028116	VRK2	VRK serine/threonine kinase 2	7444	96	68	91	83	62	16	5.98405	4.33371	5.71026	6.70916	3.84673	4.83202	0.205293	-0.355513	-0.0667966	0.714971	0.373922	1	0.401574	0.191607	0.943711
ENSG00000028137	TNFRSF1B	TNF receptor superfamily member 1B	7133	9	4	4	4	3	4	0.524327	0.238258	0.23459	0.302194	0.173963	1.12903	-0.256925	-0.795284	1.81094	1	0.665185	0.353822	1	0.46328	0.0897199
ENSG00000028203	VEZT	vezatin, adherens junctions transmembrane protein	55591	117	88	114	135	91	37	2.93769	2.25907	2.88148	4.39562	2.27425	4.50097	0.583442	-0.125694	0.818279	0.0897688	0.819498	0.118979	0.00828127	0.656037	0.0111494
ENSG00000028277	POU2F2	POU class 2 homeobox 2	5452	14	12	10	2	19	3	0.339662	0.297664	0.244236	0.0629238	0.458826	0.352634	-2.28458	0.754466	0.337187	0.146637	0.246053	1	0.0187777	0.102121	0.893415
ENSG00000028310	BRD9	bromodomain containing 9	65980	321	339	297	278	364	72	7.39893	7.98896	6.89145	8.3095	8.35105	8.04046	0.038587	0.286494	0.192029	0.975672	0.286318	0.747655	0.849585	0.128432	0.433037
ENSG00000028528	SNX1	sorting nexin 1	6642	849	782	756	674	631	130	19.0894	17.977	17.1118	19.6521	14.1217	14.1616	-0.00065725	-0.236584	-0.272304	1	0.385347	0.542936	1	0.199735	0.211915
ENSG00000028839	TBPL1	TATA-box binding protein like 1	9519	104	96	121	70	86	23	4.54267	4.28722	5.32051	3.96499	3.73897	4.86732	-0.37387	-0.217986	0.12225	0.461235	0.619858	0.934638	0.161593	0.412369	0.742454
ENSG00000029153	BMAL2	basic helix-loop-helix ARNT like 2	56938	83	40	78	81	70	20	2.61612	1.28904	2.47494	3.31078	2.19611	3.05418	0.514392	0.163513	0.598697	0.237082	0.719043	0.465575	0.0438055	0.525016	0.156156
ENSG00000029363	BCLAF1	BCL2 associated transcription factor 1	9774	756	581	772	682	388	165	17.4548	13.715	17.9432	20.4194	8.91661	18.457	0.196356	-0.758003	0.251564	0.585882	0.00125303	0.53978	0.261984	7.93055e-05	0.210055
ENSG00000029364	SLC39A9	solute carrier family 39 member 9	55334	833	728	799	625	560	155	25.6856	22.9511	24.8018	24.9914	17.1874	23.1559	-0.0928354	-0.392066	-0.00190771	0.862291	0.114849	1	0.619523	0.0339942	1
ENSG00000029534	ANK1	ankyrin 1	286	169	162	123	76	62	15	3.44513	3.37645	2.52415	2.00909	1.25802	1.48147	-0.75397	-1.18786	-0.991851	0.040556	0.000112496	0.125408	0.00221609	3.81445e-06	0.0121219
ENSG00000029559	IBSP	integrin binding sialoprotein	3381	0	0	0	0	0	0	0	0	0	0	0	0
ENSG00000029639	TFB1M	transcription factor B1, mitochondrial	51106	182	178	202	122	220	30	9.74419	9.74364	10.8872	8.47033	11.7239	7.7818	-0.381058	0.328205	-0.302395	0.349958	0.249541	0.719118	0.0948184	0.104343	0.388908
ENSG00000029725	RABEP1	rabaptin, RAB GTPase binding effector protein 1	9135	265	242	270	220	271	55	8.26275	7.71473	8.47487	8.89544	8.41053	8.30856	0.00279176	0.162648	0.105263	1	0.608066	0.900254	0.984416	0.401112	0.680908
ENSG00000029993	HMGB3	high mobility group box 3	3149	1250	1215	1332	854	1332	240	70.2929	69.8561	75.4042	62.2766	74.5557	65.3878	-0.330288	0.170086	-0.0589888	0.293312	0.520963	0.951517	0.0670573	0.314074	0.780155
ENSG00000030066	NUP160	nucleoporin 160	23279	546	461	376	529	208	102	14.013	12.0966	9.71439	17.6059	5.31344	12.683	0.439232	-1.04778	0.167118	0.122964	1.63194e-05	0.760842	0.0141281	3.57566e-07	0.451605
ENSG00000030110	BAK1	BCL2 antagonist/killer 1	578	739	758	670	618	546	114	73.5328	77.1139	67.1123	79.7428	54.0761	54.9573	0.0122759	-0.307226	-0.323685	1	0.24166	0.44246	0.938254	0.0993271	0.142699
ENSG00000030304	MUSK	muscle associated receptor tyrosine kinase	4593	0	0	0	0	0	0	0	0	0	0	0	0
ENSG00000030419	IKZF2	IKAROS family zinc finger 2	22807	1	0	1	0	0	1	0.0179821	0	0.0181022	0	0	0.0871214
ENSG00000030582	GRN	granulin precursor	2896	4366	4188	3683	3323	3381	558	272.69	267.436	231.568	269.143	210.187	168.851	-0.0572313	-0.173122	-0.528827	0.929591	0.528081	0.0658128	0.751683	0.32045	0.00391272
ENSG00000031003	FAM13B	family with sequence similarity 13 member B	51306	56	39	36	74	27	11	1.81047	1.28912	1.17164	3.10242	0.868844	1.72298	0.99907	-0.592073	0.352605	0.0109385	0.271537	0.81476	0.000265973	0.118815	0.539622
ENSG00000031081	ARHGAP31	Rho GTPase activating protein 31	57514	24	24	17	38	29	3	0.563519	0.576149	0.401824	1.15704	0.677752	0.341273	1.04442	0.515525	-0.507171	0.0502424	0.389192	0.932144	0.00307104	0.203331	0.736167
ENSG00000031691	CENPQ	centromere protein Q	55166	33	15	23	8	11	6	4.17193	1.93884	2.92713	1.31153	1.38418	3.67501	-1.31252	-0.998009	0.361045	0.159507	0.153777	0.841842	0.0220028	0.0516495	0.584133
ENSG00000031698	SARS1	seryl-tRNA synthetase 1	6301	2368	2450	2182	2268	3554	572	135.412	143.241	125.609	168.183	202.287	158.473	0.19608	0.703224	0.311269	0.559707	0.000354068	0.321844	0.238113	1.6036e-05	0.0745809
ENSG00000031823	RANBP3	RAN binding protein 3	8498	962	1001	852	702	933	166	28.4402	30.2564	25.3564	26.9129	27.4546	23.7766	-0.181389	0.0881196	-0.159145	0.648108	0.781371	0.764355	0.323017	0.604144	0.456635
ENSG00000032219	ARID4A	AT-rich interaction domain 4A	5926	25	10	28	21	5	3	0.738693	0.3021	0.832861	0.804654	0.147052	0.429467	0.238283	-1.94645	-0.461124	0.82732	0.00860941	0.956144	0.554847	0.00098155	0.79068
ENSG00000032389	EIPR1	EARP complex and GARP complex interacting protein 1	7260	484	511	461	379	551	77	18.4466	19.9121	17.6873	18.7316	20.9024	14.2182	-0.119879	0.279017	-0.316534	0.817676	0.272554	0.523673	0.540525	0.119363	0.197086
ENSG00000032444	PNPLA6	patatin like phospholipase domain containing 6	10908	1919	2094	1756	1855	1482	266	58.8921	65.703	54.2496	73.823	45.2695	39.5501	0.184418	-0.280282	-0.51491	0.594975	0.26305	0.0992411	0.269547	0.112899	0.00789492
ENSG00000032742	IFT88	intraflagellar transport 88	8100	28	19	28	26	25	7	1.00848	0.699665	1.01522	1.21436	0.896242	1.2215	0.294222	0.097683	0.5024	0.789299	0.970381	0.7738	0.495631	0.897526	0.478245
ENSG00000033011	ALG1	ALG1 chitobiosyldiphosphodolichol beta-mannosyltransferase	56052	806	753	810	596	578	134	38.9636	37.2174	39.4185	37.3625	27.8117	31.3844	-0.167866	-0.352933	-0.218397	0.687276	0.163119	0.65095	0.367603	0.0561164	0.312604
ENSG00000033030	ZCCHC8	zinc finger CCHC-type containing 8	55596	149	152	134	205	117	33	3.59398	3.74852	3.25375	6.41223	2.80899	3.85644	0.736765	-0.212492	0.204521	0.0121499	0.573866	0.80728	0.000324646	0.364867	0.529031
ENSG00000033050	ABCF2	ATP binding cassette subfamily F member 2	10061	1336	1225	1248	970	1243	219	57.0095	53.4445	53.61	53.6758	52.7943	45.2761	-0.149766	0.0671217	-0.19428	0.719976	0.839878	0.666183	0.408131	0.685929	0.331397
ENSG00000033100	CHPF2	chondroitin polymerizing factor 2	54480	289	291	246	314	222	48	15.127	15.5731	12.9623	21.3133	11.566	12.1725	0.427307	-0.213476	-0.179537	0.169617	0.516768	0.816734	0.0243152	0.309992	0.544326
ENSG00000033122	LRRC7	leucine rich repeat containing 7	57554	0	1	0	1	0	0	0	0.0152163	0	0.0192996	0	0
ENSG00000033170	FUT8	fucosyltransferase 8	2530	101	102	101	93	65	25	3.31794	3.42589	3.3401	3.96183	2.12538	3.97898	0.113669	-0.543014	0.320594	0.882344	0.135825	0.711249	0.654525	0.0429614	0.380806
ENSG00000033178	UBA6	ubiquitin like modifier activating enzyme 6	55236	173	92	109	134	89	31	3.33779	1.81479	2.11704	3.35261	1.70914	2.89773	0.347777	-0.382666	0.338359	0.389154	0.28041	0.644365	0.116174	0.124752	0.305568
ENSG00000033327	GAB2	GRB2 associated binding protein 2	9846	69	64	52	94	50	19	2.24162	2.12578	1.70062	3.9601	1.61681	2.99055	0.845587	-0.204204	0.641492	0.0197752	0.730478	0.410227	0.000702768	0.539	0.11996
ENSG00000033627	ATP6V0A1	ATPase H+ transporting V0 subunit a1	535	1021	937	861	763	812	138	20.5133	19.2476	17.4142	19.8793	16.2383	13.433	-0.0613976	-0.112452	-0.425807	0.929401	0.733406	0.252287	0.751037	0.543171	0.0453923
ENSG00000033800	PIAS1	protein inhibitor of activated STAT 1	8554	212	175	192	145	140	29	4.33012	3.65451	3.94781	3.84059	2.84622	2.86977	-0.172863	-0.364198	-0.392018	0.747653	0.250486	0.579997	0.436706	0.104863	0.24676
ENSG00000033867	SLC4A7	solute carrier family 4 member 7	9497	42	24	43	56	18	18	0.96134	0.561649	0.990801	1.66219	0.410087	1.99611	0.861542	-0.909979	1.32523	0.0606934	0.0882382	0.0644107	0.00411109	0.0233769	0.00377753
ENSG00000034053	APBA2	amyloid beta precursor protein binding family A member 2	321	10	11	4	3	6	1	0.320427	0.360369	0.129026	0.124657	0.191362	0.155243	-1.2059	-0.370012	-0.700993	0.612976	0.806654	0.934638	0.288021	0.639559	0.744499
ENSG00000034152	MAP2K3	mitogen-activated protein kinase kinase 3	5606	1273	1239	1304	1054	1130	227	74.2221	73.8589	76.5373	79.6914	65.5781	64.1232	-0.033791	-0.0741977	-0.146355	0.980332	0.840925	0.770396	0.8656	0.688232	0.466869
ENSG00000034239	CLXN	calaxin	79645	1	0	0	0	0	0	0.0378051	0	0	0	0	0
ENSG00000034510	TMSB10	thymosin beta 10	9168	32386	33179	37859	24948	68301	8025	15462.5	16196.1	18196.2	15446.2	32458.1	18563.1	-0.230553	1.08157	0.235625	0.486721	1.32021e-09	0.453171	0.179437	6.87885e-12	0.148827
ENSG00000034533	ASTE1	asteroid homolog 1	28990	61	25	47	34	27	7	3.91776	1.64163	3.03876	2.83174	1.72603	2.17816	-0.140618	-0.612293	-0.317372	0.943083	0.247247	0.901959	0.779414	0.102978	0.684693
ENSG00000034677	RNF19A	ring finger protein 19A, RBR E3 ubiquitin protein ligase	25897	66	42	52	45	25	19	2.48234	1.61508	1.96884	2.19481	0.935908	3.46223	-0.00464496	-0.990112	0.852062	1	0.0317179	0.264335	1	0.005477	0.0496533
ENSG00000034693	PEX3	peroxisomal biogenesis factor 3	8504	75	46	78	75	41	10	5.83307	3.6578	6.1069	7.56419	3.17391	3.76808	0.416548	-0.593459	-0.386056	0.384058	0.149672	0.768228	0.113421	0.0494907	0.464497
ENSG00000034713	GABARAPL2	GABA type A receptor associated protein like 2	11345	464	461	550	310	446	114	33.9292	34.4654	40.4863	29.3957	32.4613	40.3873	-0.428597	-0.0448004	0.2305	0.184242	0.930839	0.623056	0.0280979	0.828428	0.286431
ENSG00000034971	MYOC	myocilin	4653	0	0	0	0	0	0	0	0	0	0	0	0
ENSG00000035115	SH3YL1	SH3 and SYLF domain containing 1	26751	42	33	27	31	20	3	0.830421	0.667098	0.537406	0.794834	0.393599	0.287378	0.105792	-0.663788	-1.15238	0.958644	0.237724	0.552586	0.810645	0.0973605	0.219742
ENSG00000035141	FAM136A	family with sequence similarity 136 member A	84908	1199	1143	1375	875	1279	239	85.5156	83.3487	98.7232	80.9282	90.7971	82.5863	-0.264642	0.142116	-0.0344095	0.430113	0.607371	0.996258	0.142193	0.400086	0.883189
ENSG00000035403	VCL	vinculin	7414	1277	1174	999	1262	614	219	28.1294	26.4402	22.1526	36.0491	13.4621	23.3721	0.373428	-0.806675	-0.0507055	0.182032	0.000325838	0.971112	0.0274325	1.44091e-05	0.81951
ENSG00000035499	DEPDC1B	DEP domain containing 1B	55789	106	81	101	95	68	38	6.12998	4.78922	5.87983	7.12431	3.91415	10.6468	0.22418	-0.398182	1.00389	0.681739	0.303488	0.0392581	0.362486	0.139866	0.0016705
ENSG00000035664	DAPK2	death associated protein kinase 2	23604	60	60	71	52	88	6	0.970178	0.991923	1.15571	1.09036	1.41631	0.470041	-0.0544293	0.562662	-1.06362	1	0.099186	0.354332	0.923732	0.0276621	0.0900704
ENSG00000035681	NSMAF	neutral sphingomyelinase activation associated factor	8439	309	259	281	203	300	93	11.0229	9.44633	10.091	9.39072	10.6521	16.0733	-0.239653	0.182774	0.736262	0.572041	0.552125	0.0392081	0.248186	0.344181	0.00166507
ENSG00000035687	ADSS2	adenylosuccinate synthase 2	159	125	144	102	127	100	23	7.99553	9.4173	6.56792	10.5343	6.36668	7.1277	0.275073	-0.210119	-0.0871421	0.543769	0.597665	0.985585	0.224172	0.388696	0.846902
ENSG00000035720	STAP1	signal transducing adaptor family member 1	26228	0	0	0	0	0	0	0	0	0	0	0	0
ENSG00000035862	TIMP2	TIMP metallopeptidase inhibitor 2	7077	2677	2369	2309	2639	1806	407	104.6	94.6398	90.8231	133.717	70.2385	77.0479	0.345705	-0.342311	-0.248621	0.215938	0.154035	0.505496	0.036832	0.0517567	0.184031
ENSG00000035928	RFC1	replication factor C subunit 1	5981	330	268	256	344	259	70	10.8101	8.97591	8.44204	14.6131	8.44486	11.1096	0.513478	-0.0366233	0.319067	0.0751443	0.955913	0.527612	0.00597841	0.873362	0.199661
ENSG00000036054	TBC1D23	TBC1 domain family member 23	55773	27	23	22	39	18	9	1.14813	0.999959	0.941761	2.15059	0.761861	1.85419	0.935403	-0.315342	0.921747	0.0864212	0.715506	0.396779	0.00768381	0.519399	0.111639
ENSG00000036257	CUL3	cullin 3	8452	284	223	300	264	206	91	5.43318	4.36181	5.77759	6.54946	3.92264	8.43453	0.212313	-0.286194	0.77799	0.600191	0.344153	0.0275463	0.274957	0.169608	0.000979235
ENSG00000036448	MYOM2	myomesin 2	9172	62	57	50	39	70	9	1.93399	1.81788	1.57009	1.57759	2.17339	1.36016	-0.291105	0.410366	-0.303856	0.680987	0.300546	0.87599	0.361828	0.137982	0.636658
ENSG00000036473	OTC	ornithine transcarbamylase	5009	2	0	0	0	0	0	0.261558	0	0	0	0	0
ENSG00000036530	CYP46A1	cytochrome P450 family 46 subfamily A member 1	10858	2	0	1	3	4	1	0.0470402	0	0.0236771	0.0915011	0.0936428	0.113952
ENSG00000036549	ZZZ3	zinc finger ZZ-type containing 3	26009	139	93	121	160	104	60	3.39632	2.32329	2.97625	5.06967	2.52931	7.10279	0.683698	-0.0779601	1.37062	0.0296823	0.893065	0.000152471	0.00134631	0.767022	9.67587e-07
ENSG00000036565	SLC18A1	solute carrier family 18 member A1	6570	0	0	0	0	0	0	0	0	0	0	0	0
ENSG00000036672	USP2	ubiquitin specific peptidase 2	9099	63	68	45	52	54	7	3.06574	3.38323	2.20444	3.28144	2.61556	1.65036	0.0637977	-0.0224261	-0.724109	0.970218	1	0.56617	0.838357	1	0.233108
ENSG00000036828	CASR	calcium sensing receptor	846	0	0	0	0	0	0	0	0	0	0	0	0
ENSG00000037042	TUBG2	tubulin gamma 2	27175	212	136	211	155	259	34	16.7066	10.9576	16.7388	15.8398	20.3154	12.9812	-0.0244386	0.575045	-0.11049	1	0.0219806	0.939545	0.9327	0.00332132	0.75305
ENSG00000037241	RPL26L1	ribosomal protein L26 like 1	51121	352	340	357	241	347	54	66.5598	65.7316	67.956	59.0952	65.3091	49.4706	-0.299144	0.0857463	-0.354558	0.420379	0.8111	0.517681	0.136167	0.645575	0.192479
ENSG00000037280	FLT4	fms related receptor tyrosine kinase 4	2324	1	0	0	1	1	0	0.0248646	0	0	0.0322438	0.0247489	0
ENSG00000037474	NSUN2	NOP2/Sun RNA methyltransferase 2	54888	993	1019	1004	838	764	198	39.6949	41.6473	40.4026	43.4406	30.3987	38.3473	-0.0257996	-0.299997	-0.00472093	0.9976	0.24166	1	0.903881	0.0993277	1
ENSG00000037637	FBXO42	F-box protein 42	54455	314	290	308	277	331	71	7.67141	7.24386	7.57507	8.77589	8.04913	8.40403	0.104052	0.220097	0.242517	0.850093	0.436072	0.658781	0.592512	0.241018	0.323953
ENSG00000037749	MFAP3	microfibril associated protein 3	4238	71	64	47	72	25	11	2.00477	1.84762	1.33596	2.63636	0.702621	1.50481	0.48537	-1.17686	-0.121382	0.28944	0.00631965	0.991417	0.064887	0.000660672	0.864188
ENSG00000037757	MRI1	methylthioribose-1-phosphate isomerase 1	84245	224	167	213	156	129	36	14.2246	10.8427	13.6164	12.8465	8.15377	11.0759	-0.127696	-0.5424	-0.140614	0.846296	0.0648621	0.905736	0.587376	0.0149098	0.691992
ENSG00000037897	METTL1	methyltransferase 1, tRNA methylguanosine	4234	620	626	709	515	723	151	70.0887	72.3531	80.685	75.4969	81.3523	82.7022	-0.102947	0.245553	0.229488	0.847808	0.33158	0.596077	0.589841	0.160459	0.260421
ENSG00000037965	HOXC8	homeobox C8	3224	9	10	14	6	13	2	0.819573	0.931048	1.2834	0.708537	1.17832	0.882388	-0.62736	0.334504	-0.117364	0.745619	0.705877	1	0.435069	0.506804	1
ENSG00000038002	AGA	aspartylglucosaminidase	175	11	16	19	8	25	7	0.929409	1.38217	1.61606	0.876537	2.10247	2.86547	-0.693869	0.796504	1.20017	0.582963	0.167206	0.358883	0.259025	0.0582372	0.0925376
ENSG00000038210	PI4K2B	phosphatidylinositol 4-kinase type 2 beta	55300	68	37	71	75	83	20	4.06157	2.2595	4.26907	5.80914	4.93444	5.7876	0.593689	0.599067	0.788788	0.16868	0.0767368	0.28513	0.024023	0.0190227	0.0586338
ENSG00000038219	BOD1L1	biorientation of chromosomes in cell division 1 like 1	259282	160	90	93	167	96	33	2.22016	1.27683	1.29908	3.00501	1.3259	2.21851	0.789549	-0.149183	0.552833	0.00976877	0.759693	0.362871	0.000225784	0.575515	0.0940264
ENSG00000038274	MAT2B	methionine adenosyltransferase 2 non-catalytic beta subunit	27430	266	240	283	186	120	63	11.4015	10.5177	12.2112	10.3386	5.11963	13.083	-0.261435	-1.03397	0.278925	0.534441	0.000107013	0.616824	0.216609	3.5671e-06	0.280443
ENSG00000038295	TLL1	tolloid like 1	7092	1	1	4	2	1	0	0.0271562	0.0277649	0.10935	0.0704312	0.0270299	0
ENSG00000038358	EDC4	enhancer of mRNA decapping 4	23644	1299	1050	679	1225	291	125	46.5653	38.4831	24.5027	56.945	10.383	21.7094	0.522268	-1.69182	-0.667794	0.0376893	2.81271e-14	0.0426723	0.00200657	5.63669e-17	0.0019009
ENSG00000038382	TRIO	trio Rho guanine nucleotide exchange factor	7204	333	272	236	355	190	61	4.10379	3.42717	2.92781	5.67329	2.33061	3.64212	0.581288	-0.460922	0.143027	0.03604	0.0973524	0.833044	0.00185994	0.0269231	0.571202
ENSG00000038427	VCAN	versican	1462	368	289	254	487	176	89	5.51827	4.43077	3.83424	9.47	2.6269	6.4659	0.922572	-0.685973	0.573106	7.15821e-05	0.00976425	0.142133	2.86902e-07	0.00116232	0.0150393
ENSG00000038532	CLEC16A	C-type lectin domain containing 16A	23274	331	298	280	288	282	41	5.81757	5.35496	4.95407	6.56405	4.93331	3.49125	0.165809	-0.00535419	-0.543625	0.707017	1	0.285604	0.390914	1	0.0589115
ENSG00000038945	MSR1	macrophage scavenger receptor 1	4481	0	0	1	0	0	0	0	0	0.0283629	0	0	0
ENSG00000039068	CDH1	cadherin 1	999	838	806	831	636	506	103	30.222	29.7194	30.1696	29.7442	18.1637	17.997	-0.137598	-0.608252	-0.661313	0.764947	0.00986875	0.0569369	0.459712	0.00117805	0.00298567
ENSG00000039123	MTREX	Mtr4 exosome RNA helicase	23517	182	141	144	197	93	56	6.31139	4.99918	5.02697	8.85902	3.21005	9.40861	0.579812	-0.642878	0.86739	0.063818	0.0373101	0.0414594	0.00454868	0.00686386	0.001812
ENSG00000039139	DNAH5	dynein axonemal heavy chain 5	1767	3	2	5	6	3	1	0.0400791	0.0273183	0.0672445	0.103947	0.0398927	0.0647263
ENSG00000039319	ZFYVE16	zinc finger FYVE-type containing 16	9765	80	34	42	69	62	13	1.13674	0.493942	0.600773	1.27141	0.876875	0.894948	0.650019	0.355371	0.344853	0.134335	0.385747	0.760633	0.016341	0.200083	0.451349
ENSG00000039523	RIPOR1	RHO family interacting cell polarization regulator 1	79567	1222	1128	949	1131	831	166	39.9708	37.7231	31.2484	47.9733	27.055	26.3065	0.279863	-0.305605	-0.385856	0.360691	0.227177	0.296343	0.100245	0.091235	0.0624046
ENSG00000039537	C6	complement C6	729	0	0	0	0	0	0	0	0	0	0	0	0
ENSG00000039560	RAI14	retinoic acid induced 14	26064	286	195	207	285	216	59	8.30351	5.78838	6.05001	10.7302	6.24201	8.29911	0.555652	0.0151165	0.386039	0.0577699	0.997387	0.440798	0.00380502	0.941954	0.141161
ENSG00000039600	SOX30	SRY-box transcription factor 30	11063	3	1	0	2	0	1	0.189253	0.0644982	0	0.163613	0	0.305636
ENSG00000039650	PNKP	polynucleotide kinase 3'-phosphatase	11284	620	688	537	527	691	119	30.0248	34.0646	26.179	33.0952	33.3075	27.9202	0.0137399	0.263717	-0.0305596	1	0.295281	1	0.934382	0.134169	0.914371
ENSG00000039987	BEST2	bestrophin 2	54831	0	0	1	0	1	0	0	0	0.083738	0	0.0827957	0
ENSG00000040199	PHLPP2	PH domain and leucine rich repeat protein phosphatase 2	23035	137	108	122	101	102	31	2.41366	1.94539	2.16374	2.3075	1.78867	2.64607	-0.036681	-0.163186	0.361387	0.99598	0.707125	0.59655	0.900107	0.509113	0.262224
ENSG00000040275	SPDL1	spindle apparatus coiled-coil protein 1	54908	118	100	108	121	82	32	5.43915	4.71276	5.01144	7.23269	3.76217	7.14632	0.393762	-0.307594	0.577158	0.331434	0.41129	0.337292	0.0846615	0.221553	0.0809517
ENSG00000040341	STAU2	staufen double-stranded RNA binding protein 2	27067	118	82	130	124	81	20	2.89736	2.05855	3.21332	3.94828	1.97961	2.37922	0.412139	-0.342196	-0.117001	0.291472	0.348753	0.956144	0.0656542	0.172513	0.791017
ENSG00000040487	SLC66A1	solute carrier family 66 member 1	54896	212	182	211	173	247	47	17.3721	15.248	17.4056	18.3835	20.146	18.6594	0.0176575	0.390334	0.239989	1	0.1484	0.728444	0.926664	0.0488917	0.405189
ENSG00000040531	CTNS	cystinosin, lysosomal cystine transporter	1497	302	243	217	217	212	44	19.5617	16.0928	14.1497	18.2274	13.6682	13.8081	0.013732	-0.160665	-0.185727	1	0.65531	0.809174	0.928919	0.451407	0.533234
ENSG00000040608	RTN4R	reticulon 4 receptor	65078	339	335	394	342	303	48	23.8689	24.116	27.9267	31.2266	21.2349	16.3741	0.178965	-0.13646	-0.551038	0.662733	0.701942	0.248378	0.342786	0.501752	0.0441033
ENSG00000040633	PHF23	PHD finger protein 23	79142	1539	1561	1524	1081	1307	238	123.943	128.532	123.554	112.895	104.769	92.8631	-0.274743	-0.141722	-0.35553	0.401016	0.634866	0.315165	0.124002	0.428655	0.0713069
ENSG00000040731	CDH10	cadherin 10	1008	0	0	0	0	0	0	0	0	0	0	0	0
ENSG00000040933	INPP4A	inositol polyphosphate-4-phosphatase type I A	3631	150	145	129	128	106	30	2.50361	2.4744	2.16748	2.77046	1.76099	2.42595	0.0952515	-0.317283	0.104646	0.887597	0.36822	0.945058	0.666854	0.187701	0.768799
ENSG00000041353	RAB27B	RAB27B, member RAS oncogene family	5874	5	2	3	3	3	4	0.153831	0.0629114	0.0929147	0.119691	0.0918692	0.596234	0.0835757	-0.0520959	2.54924	1	1	0.180356	1	1	0.0231078
ENSG00000041357	PSMA4	proteasome 20S subunit alpha 4	5685	1263	1082	1514	873	2125	308	39.7466	34.8137	47.9637	35.6268	66.5627	46.9603	-0.32105	0.821402	0.278362	0.310885	2.45917e-05	0.427176	0.0748033	5.94668e-07	0.131528
ENSG00000041515	MYO16	myosin XVI	23026	4	2	4	2	4	0	0.0998643	0.0510513	0.100531	0.064751	0.0993999	0
ENSG00000041802	LSG1	large 60S subunit nuclear export GTPase 1	55341	944	925	855	672	865	191	43.2775	43.3569	39.4591	39.9508	39.4713	42.4236	-0.196297	0.0270497	0.0913006	0.610959	0.952203	0.874088	0.285645	0.866538	0.633271
ENSG00000041880	PARP3	poly(ADP-ribose) polymerase family member 3	10039	235	225	199	222	187	33	17.6652	17.2926	15.0589	21.6406	13.9916	12.0185	0.253549	-0.134612	-0.393482	0.515876	0.733842	0.544973	0.200664	0.543897	0.214858
ENSG00000041982	TNC	tenascin C	3371	3	5	5	3	0	1	0.0685033	0.116731	0.114934	0.0888336	0	0.11063
ENSG00000041988	THAP3	THAP domain containing 3	90326	350	331	389	259	499	73	18.9183	18.2923	21.1667	18.1543	26.8467	19.1171	-0.224012	0.580959	0.0514254	0.596297	0.0103089	0.97471	0.271338	0.00125332	0.825029
ENSG00000042062	RIPOR3	RIPOR family member 3	140876	2	0	1	2	0	0	0.0730868	0	0.0367874	0.0947774	0	0
ENSG00000042088	TDP1	tyrosyl-DNA phosphodiesterase 1	55775	278	250	202	180	177	36	9.83257	9.04042	7.19224	8.25583	6.23119	6.16891	-0.195197	-0.360201	-0.414397	0.680987	0.220207	0.487794	0.36188	0.0869003	0.174589
ENSG00000042286	AIFM2	apoptosis inducing factor mitochondria associated 2	84883	755	866	807	696	1074	198	32.3615	37.9512	34.8213	38.6863	45.8207	41.1179	0.0176508	0.502563	0.306545	1	0.0215372	0.407399	0.915453	0.00322699	0.117321
ENSG00000042304	C2orf83	chromosome 2 open reading frame 83		0	0	0	0	0	0	0	0	0	0	0	0
ENSG00000042317	SPATA7	spermatogenesis associated 7	55812	38	34	40	21	44	6	1.21709	1.11338	1.2897	0.872216	1.40271	0.931052	-0.589262	0.333445	-0.295248	0.409421	0.51461	0.928229	0.12939	0.308044	0.73012
ENSG00000042429	MED17	mediator complex subunit 17	9440	58	44	58	67	46	18	0.768565	0.596117	0.773697	1.15131	0.606716	1.1556	0.567094	-0.114865	0.772849	0.220323	0.871183	0.33075	0.0383241	0.733072	0.0784564
ENSG00000042445	RETSAT	retinol saturase	54884	1198	1149	1080	903	584	130	65.1225	63.8588	59.1001	63.6543	31.5982	34.2375	-0.100978	-0.870473	-0.794528	0.843947	0.000101144	0.00961668	0.583434	3.31741e-06	0.00019328
ENSG00000042493	CAPG	capping actin protein, gelsolin like	822	2098	2339	2003	1860	2458	381	190.894	217.592	183.467	219.465	222.609	167.956	0.0291018	0.290412	-0.155793	0.975672	0.209047	0.732586	0.851513	0.0804629	0.411757
ENSG00000042753	AP2S1	adaptor related protein complex 2 subunit sigma 1	1175	3156	3234	3744	2226	4080	596	407.652	427.09	486.831	372.858	524.551	372.978	-0.365657	0.367572	-0.164203	0.216042	0.0931271	0.702104	0.0368728	0.0253316	0.37014
ENSG00000042781	USH2A	usherin	7399	0	0	0	0	0	0	0	0	0	0	0	0
ENSG00000042813	ZPBP	zona pellucida binding protein	11055	0	0	0	0	0	0	0	0	0	0	0	0
ENSG00000042832	TG	thyroglobulin	7038	0	1	1	0	1	0	0	0.0202151	0.0199039	0	0.01968	0
ENSG00000042980	ADAM28	ADAM metallopeptidase domain 28	10863	1	0	0	1	0	2	0.0236211	0	0	0.0306313	0	0.228883
ENSG00000043039	BARX2	BARX homeobox 2	8538	9	6	9	1	10	1	0.527961	0.359863	0.531486	0.076072	0.583895	0.284213	-2.63391	0.413929	-0.642976	0.155763	0.836369	0.97952	0.0210811	0.680849	0.837052
ENSG00000043093	DCUN1D1	defective in cullin neddylation 1 domain containing 1	54165	77	50	94	71	46	19	2.04018	1.35449	2.50724	2.43951	1.21314	2.43902	0.18592	-0.579584	0.38622	0.790292	0.157745	0.69182	0.496875	0.0537406	0.358067
ENSG00000043143	JADE2	jade family PHD finger 2	23338	982	878	821	971	716	146	21.8831	20.0041	18.4175	28.0596	15.8813	15.7628	0.359119	-0.221172	-0.271755	0.214131	0.417589	0.529272	0.036275	0.226408	0.200925
ENSG00000043355	ZIC2	Zic family member 2	7546	242	210	223	210	161	44	16.1898	14.3639	15.0183	18.2184	10.7208	14.2614	0.139482	-0.38438	-0.0127152	0.788751	0.203821	1	0.494853	0.077539	1
ENSG00000043462	LCP2	lymphocyte cytosolic protein 2	3937	0	0	0	0	1	0	0	0	0	0	0.0320335	0
ENSG00000043514	TRIT1	tRNA isopentenyltransferase 1	54802	277	238	281	170	267	36	9.33231	8.19809	9.53029	7.42718	8.95357	5.87619	-0.403209	0.10696	-0.539985	0.272038	0.759693	0.315255	0.0573349	0.575622	0.0715329
ENSG00000043591	ADRB1	adrenoceptor beta 1	153	15	15	5	4	11	0	1.08638	1.11073	0.364545	0.375679	0.792975	0	-1.28251	0.0127127	-6.2401	0.392333	1	0.28513	0.118591	0.973314	0.0587021
ENSG00000044012	GUCA2B	guanylate cyclase activator 2B	2981	0	0	0	0	0	0	0	0	0	0	0	0
ENSG00000044090	CUL7	cullin 7	9820	912	934	703	902	671	115	35.6667	37.3458	27.6767	45.7447	26.1196	21.7896	0.324149	-0.24344	-0.544647	0.276821	0.366358	0.131634	0.0599316	0.185363	0.0131458
ENSG00000044115	CTNNA1	catenin alpha 1	1495	3834	3731	3136	2863	2525	659	95.5682	95.0852	78.6915	92.5441	62.6467	79.5849	-0.0787519	-0.400841	-0.0953967	0.882344	0.0847973	0.858013	0.658828	0.0220315	0.606241
ENSG00000044446	PHKA2	phosphorylase kinase regulatory subunit alpha 2	5256	262	262	225	238	323	58	6.74698	6.89821	5.83285	7.94788	8.27916	7.23636	0.168825	0.468419	0.234467	0.709405	0.06071	0.70116	0.393307	0.0135938	0.368417
ENSG00000044459	CNTLN	centlein	54875	20	10	15	35	10	9	0.397869	0.203393	0.300394	0.902909	0.198009	0.867434	1.454	-0.481437	1.59506	0.00578238	0.717845	0.121427	0.000102749	0.523255	0.0115344
ENSG00000044524	EPHA3	EPH receptor A3	2042	0	0	0	0	0	0	0	0	0	0	0	0
ENSG00000044574	HSPA5	heat shock protein family A (Hsp70) member 5	3309	16627	16315	14633	12295	11964	2526	933.338	936.351	826.892	894.993	668.462	686.978	-0.12919	-0.309419	-0.309802	0.762013	0.194137	0.323551	0.455307	0.0724676	0.0752037
ENSG00000046604	DSG2	desmoglein 2	1829	592	488	417	696	247	131	21.5158	18.1335	15.2568	32.8028	8.93529	23.067	0.720975	-0.913987	0.41402	0.00259011	0.000154045	0.270572	3.4085e-05	5.64933e-06	0.05195
ENSG00000046647	GEMIN8	gem nuclear organelle associated protein 8	54960	134	131	129	110	157	33	12.1673	12.1615	11.7915	12.9523	14.1894	14.5174	-0.0178204	0.35426	0.34736	1	0.238362	0.632705	1	0.0976537	0.295763
ENSG00000046651	OFD1	OFD1 centriole and centriolar satellite protein	8481	42	28	27	38	52	7	1.78598	1.21734	1.1558	2.09545	2.20093	1.44215	0.471357	0.782254	0.134313	0.446223	0.0554083	0.984881	0.152226	0.0119124	0.845997
ENSG00000046653	GPM6B	glycoprotein M6B	2824	0	0	0	0	0	0	0	0	0	0	0	0
ENSG00000046774	MAGEC2	MAGE family member C2	51438	0	0	0	0	0	0	0	0	0	0	0	0
ENSG00000046889	PREX2	phosphatidylinositol-3,4,5-trisphosphate dependent Rac exchange factor 2	80243	0	0	0	0	0	0	0	0	0	0	0	0
ENSG00000047056	WDR37	WD repeat domain 37	22884	119	101	90	75	71	17	4.1568	3.60712	3.16479	3.39735	2.46858	2.87704	-0.222456	-0.442052	-0.261149	0.714971	0.231443	0.824699	0.40125	0.093613	0.557532
ENSG00000047188	YTHDC2	YTH N6-methyladenosine RNA binding protein C2	64848	141	88	106	144	48	35	2.87221	1.83276	2.17367	3.80387	0.973227	3.45421	0.608178	-1.11514	0.669895	0.0705278	0.000962929	0.236325	0.00539531	5.56064e-05	0.0397904
ENSG00000047230	CTPS2	CTP synthase 2	56474	156	152	139	99	132	26	6.20787	6.18427	5.56831	5.10881	5.22839	5.01275	-0.35134	-0.0774407	-0.177874	0.439066	0.896017	0.880706	0.148243	0.772657	0.643117
ENSG00000047249	ATP6V1H	ATPase H+ transporting V1 subunit H	51606	165	193	157	117	146	36	7.11533	8.50933	6.81556	6.54279	6.26671	7.52139	-0.316566	-0.138125	0.0851829	0.47463	0.750435	0.953575	0.170734	0.561999	0.784072
ENSG00000047315	POLR2B	RNA polymerase II subunit B	5431	968	890	800	851	446	203	36.1667	33.9977	30.0894	41.2314	16.5861	36.7463	0.180949	-0.891823	0.21579	0.617661	9.16377e-05	0.603701	0.294023	2.88378e-06	0.267532
ENSG00000047346	ATOSA	atos homolog A	56204	4	1	9	9	10	3	0.0895448	0.0228879	0.202821	0.261269	0.222821	0.325376	1.16383	1.17532	1.67069	0.341706	0.273464	0.479857	0.0905737	0.120016	0.167243
ENSG00000047365	ARAP2	ArfGAP with RhoGAP domain, ankyrin repeat and PH domain 2	116984	16	10	15	8	23	8	0.283384	0.181085	0.267447	0.183743	0.40547	0.686483	-0.527619	0.843085	1.55798	0.748109	0.154873	0.183691	0.438621	0.0523071	0.0241048
ENSG00000047410	TPR	translocated promoter region, nuclear basket protein	7175	500	262	260	452	211	122	8.91097	4.77401	4.66465	10.4462	3.74294	10.5341	0.655146	-0.58432	0.868136	0.0116932	0.0261244	0.00506168	0.000305413	0.00419876	7.57393e-05
ENSG00000047457	CP	ceruloplasmin	1356	0	0	0	0	0	0	0	0	0	0	0	0
ENSG00000047578	KATNIP	katanin interacting protein	23247	258	208	219	256	157	41	5.80397	4.78405	4.95952	7.46812	3.51545	4.46862	0.404919	-0.440831	-0.1347	0.217806	0.128724	0.902216	0.037465	0.0399758	0.687781
ENSG00000047579	DTNBP1	dystrobrevin binding protein 1	84062	171	197	178	120	311	35	12.332	14.5255	12.9225	11.2224	22.3241	12.229	-0.364469	0.867802	-0.0398069	0.369381	0.000158938	1	0.105151	5.8926e-06	0.931536
ENSG00000047597	XK	X-linked Kx blood group antigen, Kell and VPS13A binding protein	7504	21	20	21	36	23	9	0.893336	0.869866	0.899301	1.98593	0.973865	1.85491	1.03424	0.250239	1.13547	0.056716	0.775496	0.296233	0.00368635	0.595169	0.0623336
ENSG00000047617	ANO2	anoctamin 2	57101	0	0	0	1	0	0	0	0	0	0.0456311	0	0
ENSG00000047621	FERRY3	FERRY endosomal RAB5 effector complex subunit 3	57102	41	23	51	50	74	14	1.82971	1.04943	2.29118	2.89358	3.28705	3.02699	0.620986	1.04497	0.886027	0.228138	0.00229391	0.315255	0.0409337	0.000173767	0.0717183
ENSG00000047634	SCML1	Scm polycomb group protein like 1	6322	16	9	22	8	8	7	0.640643	0.368439	0.886766	0.415386	0.318832	1.35793	-0.723135	-0.8622	1.17096	0.552023	0.392845	0.395854	0.231596	0.206657	0.11119
ENSG00000047644	WWC3	WWC family member 3	55841	141	149	121	128	127	23	4.36242	4.71326	3.76863	5.13551	3.911	3.44762	0.139387	-0.0126491	-0.234104	0.804503	1	0.83422	0.519031	1	0.572252
ENSG00000047648	ARHGAP6	Rho GTPase activating protein 6	395	1	0	0	0	0	0	0.0247499	0	0	0	0	0
ENSG00000047662	FAM184B	family with sequence similarity 184 member B	27146	3	0	9	1	1	0	0.0980988	0	0.296262	0.0424041	0.0325475	0
ENSG00000047849	MAP4	microtubule associated protein 4	4134	5413	4916	4430	4805	3466	736	79.7301	74.0325	65.6868	91.779	50.8146	52.5226	0.205387	-0.406719	-0.398821	0.526916	0.0783991	0.193585	0.210837	0.0196338	0.0269623
ENSG00000047932	GOPC	golgi associated PDZ and coiled-coil motif containing	57120	117	107	119	114	64	42	5.56435	5.20282	5.69726	7.03071	3.02959	9.67747	0.233784	-0.738647	0.895076	0.62808	0.0298829	0.0616751	0.302586	0.00506033	0.00346484
ENSG00000047936	ROS1	ROS proto-oncogene 1, receptor tyrosine kinase	6098	0	0	0	0	0	0	0	0	0	0	0	0
ENSG00000048028	USP28	ubiquitin specific peptidase 28	57646	134	80	102	82	97	20	5.15711	3.14788	3.95178	4.09243	3.71577	3.7292	-0.119082	-0.0177122	-0.052249	0.892358	1	1	0.677535	1	0.932023
ENSG00000048052	HDAC9	histone deacetylase 9	9734	6	5	4	7	4	0	0.0784814	0.066867	0.0526703	0.118735	0.0520776	0
ENSG00000048140	TSPAN17	tetraspanin 17	26262	1666	1620	1538	1349	1393	232	70.3141	69.9052	65.3453	73.8321	58.5186	47.4395	-0.0154717	-0.110018	-0.452584	1	0.731665	0.176377	0.94731	0.540953	0.0220536
ENSG00000048162	NOP16	NOP16 nucleolar protein	51491	1144	1133	1106	774	1318	203	87.9789	89.0859	85.6245	77.1897	100.889	75.6367	-0.30542	0.321595	-0.133762	0.346497	0.166011	0.801913	0.0931398	0.0575882	0.520166
ENSG00000048342	CC2D2A	coiled-coil and C2 domain containing 2A	57545	139	143	129	124	131	33	3.20155	3.36751	2.99107	3.70368	3.00326	3.68251	0.0936494	0.032074	0.286168	0.895188	0.961031	0.691841	0.682456	0.881673	0.358878
ENSG00000048392	RRM2B	ribonucleotide reductase regulatory TP53 inducible subunit M2B	50484	163	124	158	166	84	31	6.46656	5.0296	6.31005	8.54003	3.31696	5.95842	0.401854	-0.720618	0.0837636	0.271948	0.0213392	0.965792	0.0572961	0.00318876	0.807085
ENSG00000048405	ZNF800	zinc finger protein 800	168850	77	57	81	91	57	19	2.92556	2.21422	3.09809	4.48359	2.1556	3.49749	0.582956	-0.231491	0.425686	0.14885	0.642605	0.656374	0.0193495	0.437074	0.316976
ENSG00000048462	TNFRSF17	TNF receptor superfamily member 17	608	0	0	0	0	0	0	0	0	0	0	0	0
ENSG00000048471	SNX29	sorting nexin 29	92017	104	139	82	122	71	19	2.02589	2.76837	1.608	3.08182	1.37663	1.79316	0.40686	-0.513841	-0.17273	0.31411	0.146119	0.915734	0.0760411	0.0475645	0.708547
ENSG00000048540	LMO3	LIM domain only 3	55885	0	1	0	0	0	0	0	0.0224989	0	0	0	0
ENSG00000048544	MRPS10	mitochondrial ribosomal protein S10	55173	541	447	586	449	416	120	56.7022	47.9001	61.8288	61.026	43.3982	60.9352	0.0143225	-0.236602	0.213117	1	0.406993	0.658781	0.930527	0.217851	0.324482
ENSG00000048545	GUCA1A	guanylate cyclase activator 1A	2978	0	0	0	0	0	0	0	0	0	0	0	0
ENSG00000048649	RSF1	remodeling and spacing factor 1	51773	117	60	78	106	62	31	1.63607	0.857818	1.098	1.92216	0.862948	2.10021	0.560799	-0.352473	0.889094	0.140192	0.385172	0.112276	0.0175123	0.199456	0.00998484
ENSG00000048707	VPS13D	vacuolar protein sorting 13 homolog D	55187	367	305	279	311	310	106	3.8895	3.30487	2.97661	4.27419	3.27013	5.44274	0.212785	0.0673347	0.762255	0.586167	0.862026	0.0233524	0.262388	0.71847	0.000751894
ENSG00000048740	CELF2	CUGBP Elav-like family member 2	10659	1	0	0	0	0	0	0.0200493	0	0	0	0	0
ENSG00000048828	FAM120A	family with sequence similarity 120 member A	23196	1170	1084	1075	1179	1170	298	35.5394	33.6651	32.8717	46.4412	35.3741	43.8555	0.325957	0.174058	0.444288	0.266716	0.511532	0.150844	0.0551036	0.305518	0.0167412
ENSG00000048991	R3HDM1	R3H domain containing 1	23518	298	307	293	309	204	68	8.30465	8.74722	8.21983	11.1668	5.65862	9.18117	0.282895	-0.456662	0.201439	0.42001	0.0970175	0.737332	0.135987	0.0268175	0.421958
ENSG00000049089	COL9A2	collagen type IX alpha 2 chain	1298	69	60	65	66	60	6	3.60308	3.20333	3.41687	4.46925	3.11854	1.51796	0.267631	-0.0102199	-1.08486	0.661658	1	0.32806	0.341923	1	0.0774676
ENSG00000049130	KITLG	KIT ligand	4254	1342	885	1229	1039	466	199	47.6028	32.0959	43.8856	47.7927	16.4529	34.1993	0.0936766	-1.20376	-0.18811	0.840422	4.94789e-08	0.692464	0.578303	3.70183e-10	0.360323
ENSG00000049167	ERCC8	ERCC excision repair 8, CSA ubiquitin ligase complex subunit	1161	41	35	66	31	34	16	1.65641	1.4457	2.68423	1.6241	1.36722	3.13176	-0.371813	-0.379404	0.773382	0.607268	0.475208	0.34379	0.281799	0.274173	0.0850778
ENSG00000049192	ADAMTS6	ADAM metallopeptidase with thrombospondin type 1 motif 6	11174	0	3	0	1	0	1	0	0.0788211	0	0.0333243	0	0.124503
ENSG00000049239	H6PD	hexose-6-phosphate dehydrogenase/glucose 1-dehydrogenase	9563	298	296	241	334	317	60	7.03681	7.14624	5.72884	10.2276	7.45065	6.86428	0.501049	0.284904	0.126896	0.0857335	0.296139	0.866838	0.00759403	0.13482	0.619088
ENSG00000049245	VAMP3	vesicle associated membrane protein 3	9341	1000	894	1062	654	978	164	80.5346	73.6116	86.0988	68.3008	78.3965	63.9897	-0.352984	0.0866371	-0.246058	0.264005	0.784033	0.568978	0.0540162	0.608908	0.237525
ENSG00000049246	PER3	period circadian regulator 3	8863	29	15	17	14	9	4	0.788113	0.416782	0.465082	0.493383	0.243449	0.526665	-0.296147	-1.06663	-0.00305009	0.871857	0.175434	1	0.637614	0.0622281	0.97484
ENSG00000049247	UTS2	urotensin 2	10911	3	2	2	1	1	0	0.368678	0.251295	0.247427	0.159365	0.122321	0
ENSG00000049249	TNFRSF9	TNF receptor superfamily member 9	3604	1	2	2	6	2	0	0.0347656	0.0710896	0.0699955	0.2705	0.0692078	0
ENSG00000049283	EPN3	epsin 3	55040	620	580	512	391	344	69	30.3048	28.9851	25.193	24.7835	16.7361	16.34	-0.306534	-0.632054	-0.706332	0.373113	0.00912789	0.0645633	0.107223	0.00105852	0.00379962
ENSG00000049323	LTBP1	latent transforming growth factor beta binding protein 1	4052	57	69	55	54	38	16	1.70737	2.11314	1.65846	2.09755	1.13295	2.32197	0.0767099	-0.569478	0.423564	0.960185	0.187957	0.683271	0.818242	0.0692016	0.35008
ENSG00000049449	RCN1	reticulocalbin 1	5954	798	704	1029	544	1863	228	37.5702	33.8875	48.7693	33.2128	87.3029	52.0067	-0.395562	1.23933	0.452255	0.203526	1.23958e-11	0.1632	0.0332438	3.64339e-14	0.0190018
ENSG00000049540	ELN	elastin	2006	6	3	4	3	3	1	0.201866	0.103195	0.135476	0.130888	0.100463	0.163003
ENSG00000049541	RFC2	replication factor C subunit 2	5982	1006	1068	1008	634	1109	198	100.145	108.7	101.015	81.8443	109.885	95.4954	-0.459826	0.205928	-0.0363399	0.114034	0.418845	0.994015	0.012447	0.227381	0.873566
ENSG00000049618	ARID1B	AT-rich interaction domain 1B	57492	321	224	247	332	194	54	1.5814	1.12827	1.22497	2.12101	0.951295	1.28889	0.572465	-0.343101	0.0550449	0.0420078	0.242943	0.977116	0.00235715	0.100099	0.830055
ENSG00000049656	CLPTM1L	CLPTM1 like	81037	1732	1754	1703	1409	1582	263	58.2096	60.2703	57.6172	61.4078	52.9211	42.824	-0.0587306	-0.0325134	-0.377702	0.929401	0.952954	0.270572	0.751354	0.868162	0.0519197
ENSG00000049759	NEDD4L	NEDD4 like E3 ubiquitin protein ligase	23327	274	235	207	195	236	43	3.42735	3.0054	2.60657	3.16307	2.9383	2.60592	-0.0515149	0.0828676	-0.129989	0.970218	0.835822	0.909287	0.838393	0.679203	0.699071
ENSG00000049768	FOXP3	forkhead box P3	50943	5	4	4	7	6	1	0.342623	0.280242	0.275929	0.622029	0.409235	0.331994
ENSG00000049769	PPP1R3F	protein phosphatase 1 regulatory subunit 3F	89801	21	28	22	21	16	3	1.05576	1.43923	1.11342	1.36909	0.800648	0.730721	0.0644134	-0.465467	-0.634791	0.992683	0.548849	0.78623	0.89292	0.341115	0.497316
ENSG00000049860	HEXB	hexosaminidase subunit beta	3074	667	712	848	467	1115	138	29.2737	31.949	37.466	26.5787	48.7081	29.3437	-0.433057	0.681452	-0.0893494	0.156408	0.00101155	0.908223	0.0212827	5.95011e-05	0.694988
ENSG00000049883	PTCD2	pentatricopeptide repeat domain 2	79810	134	90	94	93	105	28	2.43446	1.67174	1.71916	2.19103	1.89873	2.46457	0.0527145	0.0869047	0.422964	0.971467	0.875409	0.549034	0.841283	0.740031	0.217266
ENSG00000050030	NEXMIF	neurite extension and migration factor	340533	0	0	0	0	0	0	0	0	0	0	0	0
ENSG00000050130	JKAMP	JNK1/MAPK8 associated membrane protein	51528	253	173	245	176	144	52	12.8013	8.94964	12.4793	11.5481	7.25222	12.7474	-0.104744	-0.534804	0.238579	0.871917	0.0644565	0.709639	0.637775	0.0147705	0.377337
ENSG00000050165	DKK3	dickkopf WNT signaling pathway inhibitor 3	27122	5	3	3	1	2	0	0.0920309	0.0564562	0.0555872	0.0238687	0.0366411	0
ENSG00000050327	ARHGEF5	Rho guanine nucleotide exchange factor 5	7984	281	265	235	239	237	44	10.6305	10.2499	8.94966	11.725	8.92426	8.06464	0.115248	-0.0376607	-0.223456	0.833148	0.958653	0.754503	0.562166	0.877432	0.444436
ENSG00000050344	NFE2L3	NFE2 like bZIP transcription factor 3	9603	207	182	229	189	139	39	10.5882	9.51806	11.7917	12.5366	7.07687	9.66494	0.113931	-0.469817	-0.0602621	0.837774	0.116157	0.994059	0.573161	0.034515	0.874865
ENSG00000050393	MCUR1	mitochondrial calcium uniporter regulator 1	63933	221	228	184	205	81	48	8.03076	8.47083	6.73089	9.66016	2.92971	8.45064	0.196016	-1.28311	0.204001	0.648108	5.03043e-06	0.763649	0.323953	8.73688e-08	0.455518
ENSG00000050405	LIMA1	LIM domain and actin binding 1	51474	546	462	416	514	298	96	19.0241	16.4581	14.5913	23.2242	10.3348	16.2056	0.35516	-0.57188	0.0371035	0.244175	0.0231582	0.989918	0.0464046	0.00355803	0.859184
ENSG00000050426	LETMD1	LETM1 domain containing 1	25875	450	421	429	395	546	81	16.42	15.7061	15.7583	18.6906	19.8303	14.3196	0.104605	0.430716	-0.0786631	0.833647	0.0671175	0.944105	0.563895	0.0157947	0.761086
ENSG00000050438	SLC4A8	solute carrier family 4 member 8	9498	23	27	20	17	8	3	0.282496	0.339058	0.247289	0.270769	0.0978024	0.178521	-0.217825	-1.43403	-0.613968	0.887999	0.0484471	0.814875	0.667453	0.00996127	0.540311
ENSG00000050555	LAMC3	laminin subunit gamma 3	10319	175	187	128	137	125	18	5.13432	5.60936	3.78047	5.21232	3.65032	2.55859	-0.0158411	-0.288712	-0.840338	1	0.402711	0.19779	0.981307	0.21454	0.0277857
ENSG00000050628	PTGER3	prostaglandin E receptor 3	5733	0	0	0	0	1	0	0	0	0	0	0.0226953	0
ENSG00000050730	TNIP3	TNFAIP3 interacting protein 3	79931	0	0	1	0	0	0	0	0	0.0591013	0	0	0
ENSG00000050748	MAPK9	mitogen-activated protein kinase 9	5601	248	201	219	168	287	29	6.09548	5.05102	5.41865	5.35466	7.02124	3.45333	-0.166427	0.464973	-0.597815	0.750549	0.0691416	0.298201	0.441662	0.0165014	0.0631064
ENSG00000050767	COL23A1	collagen type XXIII alpha 1 chain	91522	0	0	0	0	1	0	0	0	0	0	0.0607873	0
ENSG00000050820	BCAR1	BCAR1 scaffold protein, Cas family member	9564	995	935	848	915	754	166	23.807	22.8728	20.4253	28.3902	17.9568	19.243	0.221436	-0.198572	-0.138568	0.511339	0.477955	0.801913	0.197947	0.27646	0.519873
ENSG00000051009	FHIP1B	FHF complex subunit HOOK interacting protein 1B	84067	356	348	365	398	280	45	16.5448	16.5355	17.0763	23.9861	12.9522	10.1323	0.396924	-0.251052	-0.644833	0.196873	0.400576	0.168118	0.0315372	0.212324	0.0200124
ENSG00000051108	HERPUD1	homocysteine inducible ER protein with ubiquitin like domain 1	9709	511	452	442	485	369	119	22.2188	20.0939	19.3469	27.3469	15.9699	25.0686	0.289691	-0.245386	0.365164	0.373085	0.388353	0.355721	0.107149	0.202141	0.0910808
ENSG00000051128	HOMER3	homer scaffold protein 3	9454	397	362	394	348	481	69	25.5348	23.8055	25.5111	29.026	30.7937	21.5018	0.095066	0.421067	-0.136732	0.854303	0.0798536	0.849479	0.602806	0.0201581	0.596281
ENSG00000051180	RAD51	RAD51 recombinase	5888	306	346	341	212	327	71	21.8388	25.247	24.4992	19.6205	23.229	24.5499	-0.406861	0.0772936	0.117259	0.245981	0.835547	0.8752	0.0472902	0.678802	0.635002
ENSG00000051341	POLQ	DNA polymerase theta	10721	70	36	63	69	63	18	1.64219	0.863487	1.48784	2.09914	1.4711	2.04589	0.532624	0.261011	0.696051	0.253084	0.554791	0.389866	0.0500758	0.346884	0.108225
ENSG00000051382	PIK3CB	phosphatidylinositol-4,5-bisphosphate 3-kinase catalytic subunit beta	5291	205	170	176	186	174	41	5.74786	4.87335	4.9677	6.76287	4.85598	5.56955	0.257745	0.0208237	0.178693	0.527622	0.985097	0.820704	0.211296	0.92324	0.549658
ENSG00000051523	CYBA	cytochrome b-245 alpha chain	1535	1997	2809	2487	1513	2418	420	135.119	194.319	169.396	132.753	162.843	137.68	-0.452242	0.0832692	-0.198676	0.103559	0.785666	0.625138	0.0106465	0.611349	0.288223
ENSG00000051596	THOC3	THO complex subunit 3	84321	747	638	724	538	603	115	47.6152	41.5789	46.4573	44.4707	38.2576	35.5146	-0.146641	-0.122953	-0.270044	0.745443	0.707695	0.560567	0.434232	0.510292	0.227041
ENSG00000051620	HEBP2	heme binding protein 2	23593	335	307	433	219	368	81	7.12267	6.67364	9.26779	6.0382	7.78791	8.34386	-0.472993	0.134675	0.194319	0.153329	0.670543	0.729117	0.0204132	0.469245	0.407436
ENSG00000051825	MPHOSPH9	M-phase phosphoprotein 9	10198	81	62	59	77	44	11	1.73022	1.35405	1.2687	2.13291	0.935501	1.13839	0.432815	-0.51351	-0.270593	0.362404	0.212456	0.883172	0.101265	0.082371	0.649017
ENSG00000052126	PLEKHA5	pleckstrin homology domain containing A5	54477	34	30	28	35	16	13	0.59591	0.537588	0.494026	0.795491	0.279124	1.1039	0.427758	-0.836113	1.0991	0.552023	0.163088	0.233147	0.231614	0.0560949	0.0385975
ENSG00000052344	PRSS8	serine protease 8	5652	1011	1051	991	611	1094	136	74.7973	79.4995	73.8072	58.6195	80.5616	48.7481	-0.499133	0.200278	-0.564137	0.0812212	0.435771	0.0994358	0.00684168	0.240579	0.00793095
ENSG00000052723	SIKE1	suppressor of IKBKE 1	80143	188	127	137	176	126	40	7.02053	4.84889	5.15018	8.52296	4.68336	7.23696	0.465758	-0.156768	0.430742	0.177689	0.719106	0.462384	0.0262842	0.525375	0.153757
ENSG00000052749	RRP12	ribosomal RNA processing 12 homolog	23223	1420	1426	1353	1591	1301	242	36.6448	37.6244	35.1489	53.2427	33.4177	30.2568	0.422164	-0.00897294	-0.192103	0.110776	1	0.666556	0.0118249	0.977635	0.332429
ENSG00000052795	FNIP2	folliculin interacting protein 2	57600	17	10	15	22	12	4	0.340745	0.204931	0.302665	0.571832	0.239407	0.38844	0.885005	-0.123026	0.529292	0.259511	1	0.841842	0.0523071	1	0.584439
ENSG00000052802	MSMO1	methylsterol monooxygenase 1	6307	252	205	338	222	308	54	19.4479	16.1753	26.2591	22.2173	23.6591	20.1906	-0.0173682	0.314	0.0455995	1	0.236797	0.993159	0.954002	0.0967909	0.871193
ENSG00000052841	TTC17	tetratricopeptide repeat domain 17	55761	234	246	205	203	219	44	4.55946	4.90071	4.02107	5.12931	4.24734	4.15369	0.0676885	0.0362987	-0.0356224	0.919924	0.952203	1	0.732916	0.866636	0.956923
ENSG00000052850	ALX4	ALX homeobox 4	60529	0	0	0	0	0	0	0	0	0	0	0	0
ENSG00000053108	FSTL4	follistatin like 4	23105	27	30	19	24	17	2	0.88552	1.00596	0.627305	1.02073	0.554957	0.317796	0.159247	-0.475511	-1.30919	0.923347	0.510418	0.608436	0.739232	0.304341	0.271464
ENSG00000053254	FOXN3	forkhead box N3	1112	123	127	136	128	109	20	2.45377	2.59035	2.73123	3.31134	2.16436	1.93305	0.229391	-0.142921	-0.345462	0.645849	0.760408	0.717428	0.320574	0.576325	0.387756
ENSG00000053328	METTL24	methyltransferase like 24	728464	0	0	0	0	0	0	0	0	0	0	0	0
ENSG00000053371	AKR7A2	aldo-keto reductase family 7 member A2	8574	1602	1674	1625	1335	1911	356	197.98	211.514	202.163	213.947	235.068	213.153	-0.0547197	0.321883	0.140904	0.937727	0.158824	0.748769	0.769505	0.054172	0.43429
ENSG00000053372	MRTO4	MRT4 homolog, ribosome maturation factor	51154	2602	2479	2833	1886	2945	474	224.062	218.255	245.583	210.605	252.419	197.753	-0.24673	0.255325	-0.136574	0.459465	0.277894	0.768687	0.160081	0.122927	0.465269
ENSG00000053438	NNAT	neuronatin	4826	0	0	0	0	0	0	0	0	0	0	0	0
ENSG00000053501	USE1	unconventional SNARE in the ER 1	55850	475	506	451	321	580	73	43.0062	46.8397	41.1059	37.6884	52.2686	32.0217	-0.335545	0.376885	-0.369584	0.331434	0.116453	0.432427	0.0848297	0.0346169	0.135707
ENSG00000053524	MCF2L2	MCF.2 cell line derived transforming sequence-like 2	23101	2	11	3	5	6	0	0.0214023	0.120351	0.0323178	0.069385	0.0639082	0	0.140597	0.260371	-5.1349	1	1	0.658781	0.963728	0.963728	0.324814
ENSG00000053702	NRIP2	nuclear receptor interacting protein 2	83714	0	0	0	0	0	0	0	0	0	0	0	0
ENSG00000053747	LAMA3	laminin subunit alpha 3	3909	103	105	86	166	80	23	1.54452	1.6098	1.29821	3.22797	1.19404	1.67096	0.997349	-0.195395	0.248992	0.000521667	0.659201	0.780863	3.83322e-06	0.457046	0.48907
ENSG00000053770	AP5M1	adaptor related protein complex 5 subunit mu 1	55745	92	70	82	104	67	12	1.55536	1.20995	1.39556	2.28005	1.12744	0.982901	0.593564	-0.180567	-0.417672	0.111107	0.751974	0.727602	0.011897	0.564056	0.402006
ENSG00000053900	ANAPC4	anaphase promoting complex subunit 4	29945	118	86	111	80	211	24	3.46569	2.58246	3.28187	3.04694	6.16831	3.4151	-0.152144	1.10503	0.212928	0.845582	5.29378e-06	0.815014	0.586336	9.26501e-08	0.540893
ENSG00000053918	KCNQ1	potassium voltage-gated channel subfamily Q member 1	3784	66	84	64	41	59	5	3.37359	4.38989	3.2932	2.71768	3.00176	1.23823	-0.561301	-0.17798	-1.48992	0.289393	0.733925	0.155463	0.0648526	0.54434	0.0176648
ENSG00000054116	TRAPPC3	trafficking protein particle complex subunit 3	27095	1069	1005	1054	788	1109	187	66.7105	64.1223	66.2136	63.7689	68.8848	56.5382	-0.165946	0.186144	-0.138573	0.682383	0.475754	0.79699	0.363117	0.274681	0.510259
ENSG00000054118	THRAP3	thyroid hormone receptor associated protein 3	9967	3312	3226	2819	2860	1993	564	154.444	153.805	132.332	172.947	92.5045	127.422	0.113166	-0.548735	-0.12654	0.786077	0.0142762	0.784493	0.490707	0.00190254	0.494234
ENSG00000054148	PHPT1	phosphohistidine phosphatase 1	29085	2255	2390	2358	1794	2952	446	307.896	333.643	324.109	317.647	401.189	295.037	-0.143619	0.434007	-0.049157	0.728786	0.0435606	0.963879	0.417019	0.00853141	0.805228
ENSG00000054179	ENTPD2	ectonucleoside triphosphate diphosphohydrolase 2	954	246	214	232	192	199	23	20.5094	18.2414	19.4714	20.758	16.5138	9.2903	-0.0257012	-0.114846	-0.983628	1	0.773091	0.0593798	0.928802	0.591774	0.00319719
ENSG00000054219	LY75	lymphocyte antigen 75	4065	0	0	0	0	0	0	0	0	0	0	0	0
ENSG00000054267	ARID4B	AT-rich interaction domain 4B	51742	65	31	54	72	21	5	1.29202	0.630006	1.08054	1.8559	0.415481	0.481516	0.765867	-1.14659	-0.973686	0.0671643	0.011641	0.496799	0.0049483	0.00146504	0.179439
ENSG00000054277	OPN3	opsin 3	23596	28	17	18	17	8	2	1.65489	1.02728	1.07096	1.30295	0.470628	0.572699	-0.064717	-1.2809	-1.03867	1	0.0969964	0.767188	0.974835	0.0268052	0.460005
ENSG00000054282	SDCCAG8	SHH signaling and ciliogenesis regulator SDCCAG8	10806	114	134	143	97	167	35	4.71556	5.66709	5.95463	5.20315	6.87576	7.01424	-0.190136	0.452217	0.441108	0.751025	0.11697	0.477382	0.443541	0.0348489	0.164091
ENSG00000054356	PTPRN	protein tyrosine phosphatase receptor type N	5798	0	0	0	0	0	0	0	0	0	0	0	0
ENSG00000054392	HHAT	hedgehog acyltransferase	55733	38	28	26	29	28	9	1.25867	0.948225	0.866943	1.24564	0.923125	1.44429	0.158247	-0.0324665	0.570954	0.885647	1	0.654871	0.664324	0.982739	0.315449
ENSG00000054523	KIF1B	kinesin family member 1B	23095	475	424	402	504	273	106	5.9	5.38457	5.0266	8.11811	3.37518	6.37894	0.456009	-0.569051	0.309197	0.106531	0.026124	0.474745	0.0110851	0.00419643	0.162516
ENSG00000054598	FOXC1	forkhead box C1	2296	259	271	293	261	183	53	14.3124	15.3111	16.2993	18.7033	10.0656	14.1896	0.164591	-0.488131	-0.0327707	0.710717	0.0800876	1	0.394384	0.0202493	0.944622
ENSG00000054611	TBC1D22A	TBC1 domain family member 22A	25771	309	335	286	246	406	53	12.7961	14.1837	11.9227	13.2105	16.7348	10.6336	-0.0967732	0.484979	-0.208765	0.882344	0.044235	0.766213	0.657181	0.00868743	0.458721
ENSG00000054654	SYNE2	spectrin repeat containing nuclear envelope protein 2	23224	103	75	80	78	66	13	0.722586	0.537948	0.564979	0.709598	0.460863	0.441855	0.0993877	-0.281873	-0.382101	0.910059	0.535337	0.736167	0.713579	0.327353	0.420505
ENSG00000054690	PLEKHH1	pleckstrin homology, MyTH4 and FERM domain containing H1	57475	137	135	123	167	139	32	2.7848	2.80565	2.51692	4.40206	2.81232	3.15143	0.580506	0.175197	0.299484	0.0772511	0.634631	0.701104	0.00619962	0.428048	0.367974
ENSG00000054793	ATP9A	ATPase phospholipid transporting 9A (putative)	10079	306	233	231	284	230	65	8.34274	6.49486	6.34	10.0409	6.24152	8.58587	0.387069	-0.057845	0.362198	0.237948	0.916298	0.463163	0.0441723	0.805815	0.154219
ENSG00000054796	SPO11	SPO11 initiator of meiotic double strand breaks	23626	0	0	0	0	0	0	0	0	0	0	0	0
ENSG00000054803	CBLN4	cerebellin 4 precursor	140689	0	0	0	0	0	0	0	0	0	0	0	0
ENSG00000054938	CHRDL2	chordin like 2	25884	0	0	0	0	0	0	0	0	0	0	0	0
ENSG00000054965	FAM168A	family with sequence similarity 168 member A	23201	558	537	479	500	315	74	15.572	15.3218	13.4566	18.0945	8.74976	10.0052	0.168847	-0.638354	-0.484741	0.66879	0.00925563	0.256569	0.349633	0.00108137	0.0466874
ENSG00000054967	RELT	RELT TNF receptor	84957	190	174	160	170	175	27	6.7592	6.32875	5.72997	7.84254	6.19663	4.65361	0.199647	0.100677	-0.351829	0.65939	0.802592	0.649351	0.338912	0.633764	0.311142
ENSG00000054983	GALC	galactosylceramidase	2581	0	0	0	0	0	0	0	0	0	0	0	0
ENSG00000055044	NOP58	NOP58 ribonucleoprotein	51602	453	401	472	371	826	89	30.4538	27.5622	31.943	32.3432	55.2712	28.9879	-0.0141534	0.999499	0.0288215	1	4.99065e-07	0.996965	0.966467	5.83409e-09	0.884216
ENSG00000055070	SZRD1	SUZ RNA binding domain containing 1	26099	3696	3538	3304	3241	2956	565	171.551	167.898	154.38	195.077	136.565	127.055	0.122125	-0.151517	-0.295442	0.762767	0.595359	0.386267	0.4567	0.386486	0.105765
ENSG00000055118	KCNH2	potassium voltage-gated channel subfamily H member 2	3757	179	244	182	195	144	22	6.78692	9.4588	6.94675	9.58783	5.43448	4.04135	0.185889	-0.39198	-0.858459	0.689108	0.200518	0.129211	0.369181	0.07576	0.0127472
ENSG00000055130	CUL1	cullin 1	8454	389	322	386	315	427	62	20.6212	17.4521	20.5988	21.6541	22.5304	15.9236	0.0241726	0.322106	-0.218199	0.99523	0.203154	0.732576	0.898366	0.0772312	0.411004
ENSG00000055147	FAM114A2	family with sequence similarity 114 member A2	10827	89	65	67	72	49	19	3.00306	2.24241	2.27583	3.15045	1.64568	3.10608	0.206932	-0.487798	0.387085	0.746722	0.242508	0.673411	0.435862	0.0998383	0.340349
ENSG00000055163	CYFIP2	cytoplasmic FMR1 interacting protein 2	26999	761	734	626	679	652	120	15.9551	15.734	13.2124	18.4608	13.6063	12.1894	0.180179	-0.0191847	-0.217584	0.626923	0.994607	0.666049	0.301861	0.937668	0.330966
ENSG00000055208	TAB2	TGF-beta activated kinase 1 (MAP3K7) binding protein 2	23118	626	594	614	511	432	118	23.2663	22.5718	22.9727	24.6286	15.9813	21.2481	-0.0206613	-0.40372	-0.0326626	1	0.113479	1	0.927992	0.0333065	0.9137
ENSG00000055211	GINM1	glycosylated integral membrane protein 1	116254	123	116	144	94	120	26	12.0322	11.6018	14.1805	11.9243	11.6841	12.3224	-0.203837	0.00737557	0.0442684	0.735049	1	1	0.424278	0.997631	0.91069
ENSG00000055332	EIF2AK2	eukaryotic translation initiation factor 2 alpha kinase 2	5610	319	185	288	239	217	66	6.52955	3.8716	5.93438	6.3439	4.42107	6.54516	0.0993012	-0.180733	0.345225	0.860805	0.59253	0.486362	0.616271	0.383754	0.173947
ENSG00000055483	USP36	ubiquitin specific peptidase 36	57602	891	898	769	891	723	142	21.2355	21.8821	18.4502	27.5378	17.1514	16.3967	0.301144	-0.141081	-0.245769	0.324366	0.646381	0.589436	0.080734	0.442558	0.255025
ENSG00000055609	KMT2C	lysine methyltransferase 2C	58508	84	62	75	103	66	17	0.919185	0.693652	0.826181	1.46159	0.718858	0.901273	0.72232	-0.0595373	0.226372	0.0471296	0.944744	0.841842	0.00281632	0.850774	0.585412
ENSG00000055732	MCOLN3	mucolipin TRP cation channel 3	55283	25	18	30	27	38	8	0.830695	0.611506	1.00349	1.16341	1.25678	1.28788	0.386825	0.737803	0.732592	0.669604	0.111158	0.56617	0.350502	0.032397	0.234015
ENSG00000055813	CCDC85A	coiled-coil domain containing 85A	114800	0	0	0	1	0	0	0	0	0	0.0693783	0	0
ENSG00000055917	PUM2	pumilio RNA binding family member 2	23369	311	232	310	323	237	100	9.8096	7.48179	9.84335	13.2117	7.44072	15.2818	0.424019	-0.163242	0.834835	0.174263	0.634332	0.0123922	0.0253845	0.427803	0.000285591
ENSG00000055950	MRPL43	mitochondrial ribosomal protein L43	84545	1942	1892	2008	1450	1984	398	119.629	119.162	124.521	115.83	121.648	118.783	-0.188082	0.123397	0.0492193	0.613949	0.659285	0.948336	0.288838	0.457272	0.774443
ENSG00000055955	ITIH4	inter-alpha-trypsin inhibitor heavy chain 4	3700	1	0	1	1	0	0	0.0472421	0	0.0475576	0.0612626	0	0
ENSG00000055957	ITIH1	inter-alpha-trypsin inhibitor heavy chain 1	3697	0	0	0	0	0	0	0	0	0	0	0	0
ENSG00000056050	HPF1	histone PARylation factor 1	54969	79	84	88	67	158	22	12.2278	13.2932	13.7118	13.4482	24.3419	16.4979	-0.0832333	1.01236	0.411838	0.955748	0.000134879	0.632705	0.805076	4.82933e-06	0.296025
ENSG00000056097	ZFR	zinc finger RNA binding protein	51663	305	242	292	337	147	112	9.91446	8.04287	9.55526	14.2058	4.75622	17.6389	0.50869	-0.828392	1.02176	0.0796007	0.00172351	0.000697087	0.00664137	0.000119621	6.19323e-06
ENSG00000056277	ZNF280C	zinc finger protein 280C	55609	33	27	29	52	9	7	1.56605	1.31003	1.38541	3.20008	0.425118	1.60943	1.0452	-1.61017	0.256665	0.0195429	0.0118256	0.938208	0.000684066	0.00149854	0.751068
ENSG00000056291	NPFFR2	neuropeptide FF receptor 2	10886	0	0	0	0	0	0	0	0	0	0	0	0
ENSG00000056487	PHF21B	PHD finger protein 21B	112885	0	0	0	0	0	0	0	0	0	0	0	0
ENSG00000056558	TRAF1	TNF receptor associated factor 1	7185	8	8	16	14	6	8	0.393389	0.402206	0.792031	0.892742	0.293669	1.90593	0.62395	-0.721945	1.90985	0.556814	0.480988	0.111784	0.236141	0.27905	0.00987557
ENSG00000056586	RC3H2	ring finger and CCCH-type domains 2	54542	220	148	216	225	249	51	4.18769	2.88031	4.139	5.55392	4.71766	4.70333	0.449571	0.454937	0.410718	0.174869	0.0847781	0.435548	0.0255586	0.0219562	0.137851
ENSG00000056736	IL17RB	interleukin 17 receptor B	55540	172	145	136	89	139	27	12.4367	10.7194	9.89935	8.34513	10.0039	9.45856	-0.522392	-0.0205679	-0.141095	0.202866	1	0.926046	0.0331063	0.955672	0.724615
ENSG00000056972	TRAF3IP2	TRAF3 interacting protein 2	10758	252	190	179	161	138	27	7.04681	5.43216	5.0389	5.83827	3.84102	3.65797	-0.121093	-0.48407	-0.594114	0.846459	0.097414	0.325548	0.587659	0.0269662	0.0760917
ENSG00000056998	GYG2	glycogenin 2	8908	0	0	0	0	0	0	0	0	0	0	0	0
ENSG00000057019	DCBLD2	discoidin, CUB and LCCL domain containing 2	131566	2977	2562	3084	2980	2643	742	58.0887	51.1115	60.5784	75.4041	51.3317	70.1457	0.290964	-0.0230174	0.387668	0.319416	0.977036	0.182807	0.078441	0.909462	0.0239346
ENSG00000057149	SERPINB3	serpin family B member 3	6317	0	0	0	0	0	0	0	0	0	0	0	0
ENSG00000057252	SOAT1	sterol O-acyltransferase 1	6646	150	119	137	114	84	32	4.71308	3.82285	4.33336	4.64499	2.62705	4.87133	-0.00780499	-0.588561	0.261552	1	0.0711579	0.737332	1	0.0171834	0.421828
ENSG00000057294	PKP2	plakophilin 2	5318	154	152	121	148	84	27	4.81266	4.85662	3.80662	5.9978	2.61288	4.08801	0.294441	-0.66256	-0.0572867	0.474623	0.0374542	1	0.170668	0.00690037	0.897255
ENSG00000057468	MSH4	mutS homolog 4	4438	6	1	9	9	4	2	0.403855	0.0688178	0.609828	0.785566	0.267985	0.652211	0.976424	-0.308937	0.906612	0.450998	0.935432	0.7738	0.154903	0.837052	0.476806
ENSG00000057593	F7	coagulation factor VII	2155	0	0	0	0	0	0	0	0	0	0	0	0
ENSG00000057608	GDI2	GDP dissociation inhibitor 2	2665	2230	1914	2367	1399	2101	408	125.274	109.932	133.859	101.916	117.479	111.046	-0.39471	0.0510809	-0.0699563	0.176511	0.882689	0.924071	0.0259379	0.750945	0.720615
ENSG00000057657	PRDM1	PR/SET domain 1	639	7	11	7	6	5	3	0.228253	0.366722	0.229777	0.253709	0.16228	0.47394	-0.232332	-0.628112	0.854222	1	0.630749	0.7738	0.951634	0.424165	0.478363
ENSG00000057663	ATG5	autophagy related 5	9474	171	115	173	107	156	39	6.65557	4.57629	6.77838	5.40056	6.04351	7.35424	-0.275107	0.12761	0.370767	0.579945	0.738667	0.55694	0.255338	0.54968	0.224152
ENSG00000057704	TMCC3	transmembrane and coiled-coil domain family 3	57458	37	48	39	29	26	6	1.25057	1.65873	1.32697	1.27108	0.874695	0.982523	-0.273517	-0.570711	-0.44299	0.779133	0.302791	0.827262	0.480198	0.139361	0.560958
ENSG00000057757	PITHD1	PITH domain containing 1	57095	617	637	767	450	838	151	62.4953	65.9672	78.2074	59.1072	84.4854	74.1009	-0.346048	0.409976	0.180992	0.29158	0.0728251	0.706769	0.065813	0.017732	0.374866
ENSG00000057935	MTA3	metastasis associated 1 family member 3	57504	263	257	279	164	222	52	5.47132	5.46633	5.84293	4.42432	4.5969	5.24112	-0.461832	-0.166008	-0.0166683	0.197305	0.641485	1	0.0316452	0.435754	0.984584
ENSG00000058056	USP13	ubiquitin specific peptidase 13	8975	297	243	264	266	317	52	8.01594	6.7055	7.17286	9.30991	8.51594	6.79963	0.228954	0.34111	-0.0232416	0.563829	0.193635	1	0.241162	0.0722242	0.963907
ENSG00000058063	ATP11B	ATPase phospholipid transporting 11B (putative)	23200	100	54	101	77	69	19	2.39579	1.32272	2.4359	2.39224	1.64541	2.20539	0.0983592	-0.200294	0.181863	0.909129	0.695491	0.876954	0.711313	0.495253	0.637886
ENSG00000058085	LAMC2	laminin subunit gamma 2	3918	544	569	451	797	546	153	17.6861	18.9135	14.7605	33.6014	17.6686	24.0995	0.849675	0.16326	0.571177	0.000148588	0.568481	0.0832553	7.64281e-07	0.359709	0.00578518
ENSG00000058091	CDK14	cyclin dependent kinase 14	5218	49	24	44	29	18	8	1.53697	0.769677	1.38936	1.1796	0.561977	1.21575	-0.186175	-1.01097	0.0574864	0.886381	0.0491425	1	0.665348	0.0101404	0.939724
ENSG00000058262	SEC61A1	SEC61 translocon subunit alpha 1	29927	7380	7150	6606	5963	5313	1058	350.074	346.766	315.452	366.805	250.853	243.15	-0.00254789	-0.309912	-0.394705	1	0.195696	0.192475	0.99729	0.0733633	0.0264451
ENSG00000058272	PPP1R12A	protein phosphatase 1 regulatory subunit 12A	4659	108	97	90	125	58	41	2.00362	1.83988	1.68083	3.00723	1.07101	3.68518	0.584434	-0.662505	1.07816	0.101828	0.0595459	0.0210468	0.010346	0.0132139	0.000635481
ENSG00000058335	RASGRF1	Ras protein specific guanine nucleotide releasing factor 1	5923	36	27	50	38	41	5	0.79803	0.611937	1.11578	1.09236	0.90464	0.536995	0.250258	0.21913	-0.569516	0.750101	0.71436	0.76936	0.441026	0.51809	0.466156
ENSG00000058404	CAMK2B	calcium/calmodulin dependent protein kinase II beta	816	3	2	12	2	2	0	0.0809294	0.0551622	0.325879	0.069965	0.053702	0	-1.21995	-1.35421	-5.21903	0.607268	0.427063	0.596078	0.281952	0.233937	0.261576
ENSG00000058453	CROCC	ciliary rootlet coiled-coil, rootletin	9696	288	274	242	238	362	37	7.14243	6.94754	6.0417	7.65414	8.93589	4.44569	0.0672424	0.531233	-0.515198	0.921707	0.0274066	0.34379	0.735272	0.00450369	0.0845227
ENSG00000058600	POLR3E	RNA polymerase III subunit E	55718	438	451	393	458	348	77	10.1628	10.699	9.17956	13.7807	8.03699	8.65593	0.337296	-0.199668	-0.132448	0.285952	0.511396	0.866027	0.0631691	0.305204	0.617963
ENSG00000058668	ATP2B4	ATPase plasma membrane Ca2+ transporting 4	493	611	560	478	602	337	110	13.8341	12.9636	10.8951	17.6756	7.5948	12.0667	0.370469	-0.607153	0.0208114	0.213424	0.0131801	1	0.0360436	0.0017201	0.912596
ENSG00000058673	ZC3H11A	zinc finger CCCH-type containing 11A	9877	3	2	0	0	1	4	0.0515942	0.0351671	0	0	0.0171181	0.333291
ENSG00000058729	RIOK2	RIO kinase 2	55781	152	123	136	135	124	34	6.09498	5.04267	5.48982	7.01986	4.9491	6.60529	0.21819	-0.0450531	0.331223	0.655601	0.955427	0.637333	0.334115	0.872404	0.300019
ENSG00000058799	YIPF1	Yip1 domain family member 1	54432	344	344	330	204	347	68	37.188	38.0215	35.9127	28.5983	37.3378	35.6153	-0.49638	0.128854	0.0209519	0.13201	0.688162	1	0.0159072	0.487551	0.933831
ENSG00000058804	NDC1	NDC1 transmembrane nucleoporin	55706	634	522	697	481	542	137	29.5644	24.8873	32.7192	29.0865	25.1568	30.9517	-0.121775	-0.0903852	0.168828	0.810259	0.806736	0.735852	0.52767	0.639839	0.419883
ENSG00000058866	DGKG	diacylglycerol kinase gamma	1608	208	177	173	178	158	37	4.17139	3.62925	3.49264	4.62917	3.15392	3.59504	0.176047	-0.136551	0.0124035	0.714971	0.732555	1	0.401131	0.542394	0.956376
ENSG00000059122	FLYWCH1	FLYWCH-type zinc finger 1	84256	996	901	715	1183	917	205	26.0388	24.0831	18.8173	40.1063	23.862	25.9657	0.682123	0.173865	0.255939	0.00359403	0.518459	0.50885	5.3433e-05	0.311766	0.187188
ENSG00000059145	UNKL	unk like zinc finger	64718	301	293	265	288	345	53	8.84046	8.79838	7.8351	10.969	10.0856	7.54168	0.246411	0.366039	-0.0929074	0.516722	0.154761	0.946318	0.201097	0.0521966	0.770961
ENSG00000059377	TBXAS1	thromboxane A synthase 1	6916	4	10	2	5	7	0	0.140393	0.358849	0.0706652	0.227573	0.244545	0
ENSG00000059378	PARP12	poly(ADP-ribose) polymerase family member 12	64761	181	233	214	177	253	43	6.33863	8.34256	7.54433	8.03815	8.81887	7.29574	-0.00737663	0.366952	0.0537696	1	0.173689	0.990363	0.996958	0.0613074	0.860334
ENSG00000059573	ALDH18A1	aldehyde dehydrogenase 18 family member A1	5832	1453	1339	1156	1161	826	230	85.0776	80.1598	68.1393	88.1552	48.1399	65.2472	0.058493	-0.573446	-0.17461	0.915296	0.0125923	0.714245	0.723386	0.00161925	0.384832
ENSG00000059588	TARBP1	TAR (HIV-1) RNA binding protein 1	6894	63	58	55	32	71	20	1.77342	1.66927	1.55856	1.16812	1.98932	2.72763	-0.634186	0.372226	0.786891	0.27418	0.358389	0.28513	0.0583526	0.179578	0.0586338
ENSG00000059691	GATB	glutamyl-tRNA amidotransferase subunit B	5188	371	493	401	289	372	71	6.9549	9.4491	7.56749	7.02555	6.94121	6.44851	-0.311063	-0.0877685	-0.233724	0.386643	0.819347	0.681556	0.115166	0.655861	0.348518
ENSG00000059728	MXD1	MAX dimerization protein 1	4084	18	19	20	15	26	6	0.62381	0.673225	0.697751	0.67412	0.896868	1.00743	-0.10243	0.546496	0.673028	1	0.371829	0.735255	0.922855	0.190286	0.415591
ENSG00000059758	CDK17	cyclin dependent kinase 17	5128	28	25	26	43	13	8	0.952966	0.869933	0.890805	1.89781	0.440391	1.31915	0.942464	-0.914632	0.619155	0.0634702	0.158267	0.689906	0.00448485	0.0539714	0.356152
ENSG00000059769	DNAJC25	DnaJ heat shock protein family (Hsp40) member C25	548645	53	39	58	31	60	9	4.47978	3.37033	4.93514	3.39788	5.04787	3.68559	-0.449296	0.360358	-0.131975	0.485025	0.387231	1	0.177745	0.20122	0.949764
ENSG00000059804	SLC2A3	solute carrier family 2 member 3	6515	10	19	12	9	16	0	0.362545	0.704274	0.437959	0.423126	0.577374	0	-0.361807	0.320828	-6.46721	0.825553	0.706483	0.188568	0.55202	0.50831	0.0255833
ENSG00000059915	PSD	pleckstrin and Sec7 domain containing	5662	155	187	177	145	161	23	5.70591	7.0382	6.55929	6.92193	5.89922	4.10209	-0.019164	-0.00902273	-0.572361	1	1	0.391133	0.960909	0.994284	0.108977
ENSG00000060069	CTDP1	CTD phosphatase subunit 1	9150	680	712	646	541	533	111	20.1846	21.6081	19.3034	20.8245	15.7476	15.9631	-0.0915661	-0.253884	-0.274053	0.868154	0.351697	0.552391	0.629229	0.174768	0.219517
ENSG00000060138	YBX3	Y-box binding protein 3	8531	2545	2426	2228	1632	1962	428	64.9759	63.326	57.2624	54.0319	49.8585	52.941	-0.317763	-0.192946	-0.1462	0.303421	0.474011	0.751245	0.0714266	0.27266	0.437432
ENSG00000060140	STYK1	serine/threonine/tyrosine kinase 1	55359	34	32	36	26	47	4	2.17542	2.09334	2.31876	2.15726	2.99321	1.23996	-0.148324	0.562629	-0.742358	0.957022	0.201714	0.725605	0.807619	0.076441	0.397653
ENSG00000060237	WNK1	WNK lysine deficient protein kinase 1	65125	569	499	459	644	403	138	8.70672	7.80674	7.07042	12.7789	6.13794	10.2307	0.579009	-0.237944	0.459149	0.0240912	0.402734	0.200712	0.00096397	0.214689	0.0286238
ENSG00000060303	RPS17P5	ribosomal protein S17 pseudogene 5	442216	0	0	0	0	0	0	0	0	0	0	0	0
ENSG00000060339	CCAR1	cell division cycle and apoptosis regulator 1	55749	249	194	251	222	155	62	9.04525	7.20525	9.17878	10.4578	5.60439	10.9118	0.180192	-0.478551	0.442341	0.683002	0.0952511	0.347297	0.36372	0.0260941	0.0867663
ENSG00000060491	OGFR	opioid growth factor receptor	11054	1726	2016	1855	1396	1979	302	80.7942	96.4843	87.4125	84.7404	92.2063	68.4905	-0.183532	0.179057	-0.289666	0.626184	0.485925	0.427176	0.301254	0.283243	0.131211
ENSG00000060558	GNA15	G protein subunit alpha 15	2769	5	2	4	5	1	1	0.399748	0.163483	0.321933	0.518384	0.0795777	0.387347
ENSG00000060566	CREB3L3	cAMP responsive element binding protein 3 like 3	84699	11	11	3	8	10	4	0.914317	0.93481	0.251024	0.862303	0.827331	1.61082	0.177063	0.355926	1.26646	0.992683	0.883951	0.520735	0.893415	0.753455	0.195304
ENSG00000060642	PIGV	phosphatidylinositol glycan anchor biosynthesis class V	55650	281	282	265	260	244	43	18.2875	18.7639	17.3614	21.9426	15.8057	13.5582	0.151362	-0.0810214	-0.341924	0.746887	0.862121	0.573712	0.436155	0.718665	0.24204
ENSG00000060656	PTPRU	protein tyrosine phosphatase receptor type U	10076	818	713	607	683	518	101	26.9444	24.0122	20.1277	29.1744	16.9832	16.1184	0.178885	-0.360803	-0.475959	0.632963	0.155492	0.220762	0.308152	0.0526825	0.0344342
ENSG00000060688	SNRNP40	small nuclear ribonucleoprotein U5 subunit 40	9410	791	710	692	472	787	145	44.7903	41.1048	39.4461	34.6589	44.3565	39.7795	-0.391853	0.204752	0.00786235	0.214175	0.435114	1	0.0363235	0.239763	0.963081
ENSG00000060709	RIMBP2	RIMS binding protein 2	23504	0	0	0	0	0	0	0	0	0	0	0	0
ENSG00000060718	COL11A1	collagen type XI alpha 1 chain	1301	1	0	0	0	0	0	0.0242109	0	0	0	0	0
ENSG00000060749	QSER1	glutamine and serine rich 1	79832	343	234	257	340	149	78	6.92675	4.83145	5.22467	8.9039	2.995	7.63157	0.532697	-0.797687	0.511206	0.0639201	0.00263161	0.221835	0.00456877	0.000207611	0.0348102
ENSG00000060762	MPC1	mitochondrial pyruvate carrier 1	51660	38	57	65	23	62	14	5.40999	8.29686	9.31572	4.24626	8.78577	9.65661	-0.974718	0.311003	0.407177	0.0835249	0.481523	0.735255	0.00721986	0.279489	0.416557
ENSG00000060971	ACAA1	acetyl-CoA acyltransferase 1	30	830	934	821	538	786	136	25.7084	29.5781	25.5994	21.6095	24.2323	20.4089	-0.443646	-0.0376542	-0.325127	0.136362	0.945665	0.421443	0.0168153	0.852994	0.128573
ENSG00000060982	BCAT1	branched chain amino acid transaminase 1	586	0	1	0	0	2	0	0	0.0197139	0	0	0.0383841	0
ENSG00000061273	HDAC7	histone deacetylase 7	51564	451	473	418	402	404	73	9.99854	10.7213	9.32882	11.5572	8.91491	7.84092	0.082883	-0.0507779	-0.275684	0.874632	0.919518	0.610539	0.643108	0.811577	0.27455
ENSG00000061337	LZTS1	leucine zipper tumor suppressor 1	11178	159	168	121	121	64	20	6.1332	6.62561	4.69857	6.05259	2.45723	3.7377	-0.0656523	-1.12398	-0.559399	0.955908	0.000252964	0.447017	0.805402	1.04261e-05	0.14584
ENSG00000061455	PRDM6	PR/SET domain 6	93166	2	3	3	1	5	0	0.0476925	0.0731422	0.0720165	0.0309233	0.118677	0
ENSG00000061492	WNT8A	Wnt family member 8A	7478	0	0	0	0	0	0	0	0	0	0	0	0
ENSG00000061656	SPAG4	sperm associated antigen 4	6676	11	17	21	16	22	6	1.03114	1.62929	1.98168	1.94496	2.05268	2.72495	0.20569	0.522384	0.888374	0.913264	0.427063	0.609216	0.720504	0.234015	0.272231
ENSG00000061676	NCKAP1	NCK associated protein 1	10787	241	148	196	241	133	62	2.35543	1.47891	1.92841	3.05447	1.29384	2.93582	0.547807	-0.450009	0.691508	0.0730564	0.13605	0.106506	0.00574041	0.0430599	0.00897868
ENSG00000061794	MRPS35	mitochondrial ribosomal protein S35	60488	305	258	350	251	481	66	34.7828	30.0823	40.1812	37.1197	54.5991	36.4664	-0.0394953	0.757732	0.135803	0.979944	0.00054879	0.841085	0.86506	2.70912e-05	0.580612
ENSG00000061918	GUCY1B1	guanylate cyclase 1 soluble subunit beta 1	2983	0	0	0	0	0	0	0	0	0	0	0	0
ENSG00000061936	SFSWAP	splicing factor SWAP	6433	448	464	376	369	397	81	9.70811	10.2802	8.20228	10.3693	8.56293	8.50405	0.0190832	-0.0162467	-0.0659823	1	1	0.968229	0.919815	0.961365	0.813972
ENSG00000061938	TNK2	tyrosine kinase non receptor 2	10188	619	609	579	592	688	90	11.8194	11.8891	11.1295	14.6586	13.0758	8.32592	0.212735	0.288675	-0.402171	0.551474	0.243872	0.34379	0.230827	0.100563	0.0841439
ENSG00000061987	MON2	MON2 homolog, regulator of endosome-to-Golgi trafficking	23041	71	43	79	72	47	20	0.975844	0.604251	1.09305	1.28328	0.642977	1.33179	0.401626	-0.353069	0.655588	0.411608	0.473282	0.389866	0.130693	0.271892	0.108287
ENSG00000062038	CDH3	cadherin 3	1001	2705	2675	2225	2460	1309	324	97.9877	99.0728	81.1381	115.559	47.1975	56.8635	0.194838	-0.856146	-0.627166	0.562716	7.33063e-05	0.0277134	0.24016	2.16932e-06	0.00099598
ENSG00000062096	ARSF	arylsulfatase F	416	0	0	0	0	0	0	0	0	0	0	0	0
ENSG00000062194	GPBP1	GC-rich promoter binding protein 1	65056	299	197	255	206	262	63	10.1684	6.84977	8.73	9.08483	8.86871	10.3803	-0.0391565	0.166806	0.353937	0.985652	0.604326	0.479967	0.87754	0.397022	0.168028
ENSG00000062282	DGAT2	diacylglycerol O-acyltransferase 2	84649	79	95	89	73	121	22	2.1999	2.70474	2.49491	2.63611	3.35379	2.96812	-0.027793	0.559674	0.343759	1	0.0658429	0.710887	0.979521	0.0153024	0.379281
ENSG00000062370	ZNF112	zinc finger protein 112	7771	12	11	13	17	21	5	0.686386	0.643289	0.74855	1.26096	1.19559	1.38561	0.734501	0.897657	1.06792	0.405074	0.142413	0.573556	0.126204	0.0457776	0.241746
ENSG00000062485	CS	citrate synthase	1431	5739	5335	4786	4310	3158	828	197.338	187.558	165.667	192.184	108.084	137.939	-0.0556723	-0.64519	-0.333117	0.932903	0.00303024	0.298116	0.757577	0.000252622	0.0630602
ENSG00000062524	LTK	leukocyte receptor tyrosine kinase	4058	91	56	53	51	65	10	5.73738	3.60983	3.36386	4.16973	4.07907	3.05461	-0.144374	0.0642926	-0.391578	0.893754	0.945178	0.81476	0.6796	0.852365	0.53919
ENSG00000062582	MRPS24	mitochondrial ribosomal protein S24	64951	4	12	6	4	6	5	0.337708	1.03583	0.509944	0.437932	0.504206	2.0452	-0.623537	-0.189793	1.76551	0.896166	0.951768	0.228212	0.687164	0.864379	0.0369041
ENSG00000062598	ELMO2	engulfment and cell motility 2	63916	347	331	305	290	221	58	11.5772	11.2909	10.2439	12.547	7.33911	9.37535	0.0621635	-0.470462	-0.15713	0.925955	0.0834091	0.843163	0.74412	0.0214471	0.587072
ENSG00000062650	WAPL	WAPL cohesin release factor	23063	290	233	262	283	204	87	8.85903	7.2773	8.05712	11.2109	6.20288	12.8763	0.352875	-0.259923	0.753496	0.294342	0.404874	0.0377674	0.0679328	0.216366	0.00158436
ENSG00000062716	VMP1	vacuole membrane protein 1	81671	992	845	1099	645	1036	344	31.8559	27.7435	35.5276	26.8598	33.1141	53.5205	-0.36285	0.179867	0.832634	0.247792	0.495341	0.000603639	0.0480824	0.292572	5.08073e-06
ENSG00000062725	APPBP2	amyloid beta precursor protein binding protein 2	10513	182	156	179	150	144	34	4.05039	3.54958	4.01023	4.32895	3.1898	3.66597	0.0386253	-0.160973	-0.00017046	0.97653	0.696897	1	0.854337	0.496626	0.998533
ENSG00000062822	POLD1	DNA polymerase delta 1, catalytic subunit	5424	1309	1325	962	1235	664	143	58.3932	60.4318	43.2004	71.4423	29.4826	30.906	0.281353	-0.754629	-0.726389	0.355139	0.000829861	0.0194554	0.0972067	4.55675e-05	0.000565338
ENSG00000063015	SEZ6	seizure related 6 homolog	124925	0	0	0	0	0	0	0	0	0	0	0	0
ENSG00000063046	EIF4B	eukaryotic translation initiation factor 4B	1975	7578	7271	7079	6059	5718	1749	271.384	266.226	255.206	281.382	203.821	303.461	-0.0326453	-0.257069	0.27733	0.979769	0.299586	0.366738	0.862085	0.136963	0.0954939
ENSG00000063127	SLC6A16	solute carrier family 6 member 16	28968	37	32	38	23	37	10	2.26908	2.00644	2.34597	1.82912	2.25853	2.9712	-0.392867	0.150012	0.504519	0.633041	0.826342	0.710887	0.308444	0.665834	0.37933
ENSG00000063169	BICRA	BRD4 interacting chromatin remodeling complex associated protein	29998	178	163	170	145	144	31	5.21886	4.88618	5.01759	5.51302	4.20236	4.40353	0.00612688	-0.144598	-0.116938	1	0.738233	0.937505	0.984194	0.548916	0.749705
ENSG00000063176	SPHK2	sphingosine kinase 2	56848	377	336	339	265	296	56	13.809	12.583	12.5	12.5873	10.7916	9.93784	-0.165027	-0.14629	-0.304903	0.7245	0.662841	0.589436	0.412195	0.46077	0.25502
ENSG00000063177	RPL18	ribosomal protein L18	6141	17908	19030	17386	13486	21298	3314	1021.93	1110.29	998.763	997.979	1209.73	916.239	-0.18875	0.329644	-0.111036	0.597669	0.135023	0.804563	0.272875	0.0426057	0.525911
ENSG00000063180	CA11	carbonic anhydrase 11	770	414	474	424	301	453	76	46.8252	54.8131	48.2765	44.1481	50.998	41.6463	-0.303158	0.145591	-0.186348	0.395963	0.631738	0.766213	0.120905	0.425083	0.458729
ENSG00000063241	ISOC2	isochorismatase domain containing 2	79763	833	875	738	586	865	123	41.5935	44.6699	37.096	37.9441	42.9905	29.7557	-0.239343	0.181529	-0.38901	0.508604	0.496148	0.324775	0.196201	0.293181	0.0758459
ENSG00000063244	U2AF2	U2 small nuclear RNA auxiliary factor 2	11338	5443	5366	4692	4453	3417	652	291.132	293.447	252.639	308.866	181.917	168.96	0.0234591	-0.499432	-0.645818	0.98385	0.0265748	0.0154245	0.874687	0.00431019	0.000403908
ENSG00000063245	EPN1	epsin 1	29924	3303	3554	3102	2798	2660	498	41.2689	45.4003	39.0164	45.3344	33.0805	30.1459	-0.0102199	-0.224039	-0.397846	1	0.384847	0.209096	0.968864	0.199262	0.0306579
ENSG00000063322	MED29	mediator complex subunit 29	55588	627	603	571	520	666	117	35.9477	35.3466	32.9557	38.661	38.0061	32.4993	0.0308678	0.246978	-0.0185926	0.979663	0.331354	1	0.860867	0.159969	0.963826
ENSG00000063438	AHRR	aryl hydrocarbon receptor repressor	57491	7	10	18	9	9	3	0.34162	0.498967	0.884318	0.569579	0.437183	0.709334	-0.135538	-0.274682	0.376019	0.993616	0.931906	0.968491	0.895317	0.831868	0.81594
ENSG00000063515	GSC2	goosecoid homeobox 2	2928	0	0	0	0	0	0	0	0	0	0	0	0
ENSG00000063587	ZNF275	zinc finger protein 275	10838	243	230	202	218	187	45	6.56494	6.353	5.49371	7.63742	5.02853	5.89008	0.19292	-0.169023	0.0192105	0.65919	0.645978	1	0.337829	0.442044	0.93684
ENSG00000063601	MTMR1	myotubularin related protein 1	8776	262	246	211	212	181	57	9.1129	8.74817	7.38802	9.56219	6.26628	9.60538	0.0618198	-0.306899	0.269193	0.928432	0.319955	0.640457	0.749751	0.151514	0.302559
ENSG00000063660	GPC1	glypican 1	2817	3887	3806	3492	3585	3102	562	131.176	131.322	118.633	156.89	104.198	91.8886	0.181357	-0.168264	-0.389418	0.596297	0.542253	0.216333	0.27073	0.335023	0.0330786
ENSG00000063761	ADCK1	aarF domain containing kinase 1	57143	151	129	123	117	113	33	6.2791	5.48449	5.14891	6.30916	4.67707	6.64841	0.0401203	-0.150735	0.316388	0.985652	0.732424	0.657859	0.877964	0.541915	0.321156
ENSG00000063854	HAGH	hydroxyacylglutathione hydrolase	3029	364	401	371	304	592	79	13.721	15.4545	14.0782	14.8601	22.2116	14.4276	-0.0806025	0.739842	0.0777222	0.899472	0.00056577	0.935464	0.691996	2.82318e-05	0.745934
ENSG00000063978	RNF4	ring finger protein 4	6047	889	823	776	749	552	143	27.4009	25.9352	24.0777	29.9372	16.9347	21.3542	0.0917858	-0.489267	-0.19458	0.85225	0.043192	0.70116	0.596485	0.00842777	0.36833
ENSG00000064012	CASP8	caspase 8	841	245	202	191	226	122	47	7.44508	6.27598	5.84288	8.9059	3.69011	6.91967	0.327744	-0.701836	0.164749	0.360589	0.013761	0.833044	0.0999081	0.00181366	0.571038
ENSG00000064042	LIMCH1	LIM and calponin homology domains 1	22998	18	22	26	14	31	9	0.364741	0.455787	0.530366	0.36788	0.625244	0.883566	-0.411982	0.588397	1.04503	0.726578	0.295596	0.347006	0.414425	0.13447	0.0865312
ENSG00000064102	INTS13	integrator complex subunit 13	55726	236	179	197	214	195	50	16.9807	13.1681	14.2692	19.9674	13.9654	17.43	0.309538	0.0346994	0.31442	0.406458	0.951768	0.596685	0.127621	0.863834	0.262676
ENSG00000064115	TM7SF3	transmembrane 7 superfamily member 3	51768	564	556	562	430	567	122	22.554	22.7324	22.624	22.2986	22.5685	23.6367	-0.145304	0.112789	0.139699	0.757327	0.718941	0.798679	0.448831	0.52487	0.515167
ENSG00000064195	DLX3	distal-less homeobox 3	1747	1	5	4	2	1	0	0.0810685	0.414428	0.326439	0.210256	0.0806915	0
ENSG00000064199	SPA17	sperm autoantigenic protein 17	53340	66	75	66	35	71	12	2.79091	3.24257	2.80954	1.91927	2.98837	2.45848	-0.740356	0.137187	-0.183524	0.137393	0.780897	0.971228	0.0169607	0.60333	0.819867
ENSG00000064201	TSPAN32	tetraspanin 32	10077	0	0	0	0	0	0	0	0	0	0	0	0
ENSG00000064205	CCN5	cellular communication network factor 5	8839	0	0	0	3	0	1	0	0	0	0.171907	0	0.214087
ENSG00000064218	DMRT3	doublesex and mab-3 related transcription factor 3	58524	0	0	0	1	3	0	0	0	0	0.10583	0.24369	0
ENSG00000064225	ST3GAL6	ST3 beta-galactoside alpha-2,3-sialyltransferase 6	10402	26	25	35	13	34	7	0.910087	0.894697	1.2333	0.590091	1.18458	1.18711	-0.897446	0.341719	0.304851	0.250825	0.540468	0.891249	0.0492601	0.332982	0.661441
ENSG00000064270	ATP2C2	ATPase secretory pathway Ca2+ transporting 2	9914	76	90	70	98	100	13	2.27526	2.75477	2.10962	3.8046	2.97983	1.88558	0.55312	0.441551	-0.257302	0.159557	0.184139	0.8752	0.0220949	0.0669519	0.635032
ENSG00000064300	NGFR	nerve growth factor receptor	4804	234	230	208	125	121	23	12.4375	12.4989	11.1294	8.61574	6.40144	5.92282	-0.603114	-0.790731	-0.942311	0.0834784	0.00447204	0.0817905	0.00720885	0.000420271	0.005633
ENSG00000064309	CDON	cell adhesion associated, oncogene regulated	50937	126	140	107	104	72	34	2.61629	2.97215	2.23661	2.80037	1.48807	3.42042	-0.0204252	-0.690915	0.468605	1	0.035047	0.457287	0.98756	0.00628832	0.151066
ENSG00000064313	TAF2	TATA-box binding protein associated factor 2	6873	202	157	123	214	64	38	6.81281	5.41379	4.1761	9.35954	2.14848	6.2093	0.654497	-1.22587	0.26368	0.0270378	5.00699e-05	0.727602	0.00117038	1.36463e-06	0.401378
ENSG00000064393	HIPK2	homeodomain interacting protein kinase 2	28996	457	383	331	633	457	117	6.43875	5.5171	4.69466	11.5652	6.4088	7.98648	0.93791	0.327175	0.604776	2.63602e-05	0.194328	0.0828089	8.2761e-08	0.0725519	0.00572526
ENSG00000064419	TNPO3	transportin 3	23534	877	706	645	614	600	150	41.2807	33.9765	30.5631	37.4785	28.1109	34.2076	-0.0331334	-0.207236	0.0361082	0.985652	0.46297	0.986681	0.878247	0.263401	0.850558
ENSG00000064489	BORCS8-MEF2B	BORCS8-MEF2B readthrough		0	0	0	0	0	0	0	0	0	0	0	0
ENSG00000064490	RFXANK	regulatory factor X associated ankyrin containing protein	8625	595	690	598	437	1001	134	52.3213	62.035	52.9362	49.832	87.6134	57.0887	-0.286832	0.76786	0.110207	0.407485	0.000175991	0.848506	0.128261	6.744e-06	0.594691
ENSG00000064545	TMEM161A	transmembrane protein 161A	54929	1152	1138	1110	792	1053	169	77.2802	78.0521	74.9599	68.898	70.3104	54.9271	-0.279441	-0.009401	-0.405358	0.400182	1	0.264335	0.123656	0.976879	0.0496268
ENSG00000064547	LPAR2	lysophosphatidic acid receptor 2	9170	516	572	554	467	660	93	38.1755	43.2671	41.2606	44.8041	48.602	33.3351	0.00682987	0.364942	-0.21869	1	0.124117	0.688515	0.968563	0.0378154	0.355059
ENSG00000064601	CTSA	cathepsin A	5476	3066	2879	2515	1951	2466	380	115.237	110.634	95.1589	95.092	92.2549	69.1972	-0.292545	-0.0954553	-0.550134	0.351939	0.772608	0.0613485	0.0954961	0.591197	0.00341781
ENSG00000064607	SUGP2	SURP and G-patch domain containing 2	10147	774	696	677	691	658	147	20.1179	18.496	17.7141	23.2908	17.0233	18.5115	0.188494	-0.022927	0.0581748	0.60738	0.983387	0.944603	0.282254	0.919996	0.767006
ENSG00000064651	SLC12A2	solute carrier family 12 member 2	6558	134	102	119	158	78	43	2.76857	2.15465	2.47507	4.23324	1.60406	4.3043	0.656467	-0.501546	0.881189	0.0435792	0.142139	0.0666084	0.00249523	0.0456326	0.00396892
ENSG00000064652	SNX24	sorting nexin 24	28966	39	19	46	26	34	9	2.47091	1.23076	2.93387	2.13615	2.14411	2.7626	-0.174597	0.070618	0.395164	0.925308	0.942214	0.778212	0.741235	0.8473	0.48559
ENSG00000064655	EYA2	EYA transcriptional coactivator and phosphatase 2	2139	0	0	0	0	0	0	0	0	0	0	0	0
ENSG00000064666	CNN2	calponin 2	1265	3708	3489	3238	3014	2484	511	224.213	215.699	197.101	236.336	149.502	149.701	0.0318858	-0.38797	-0.425844	0.969137	0.0966419	0.170992	0.836395	0.0266562	0.0205389
ENSG00000064687	ABCA7	ATP binding cassette subfamily A member 7	10347	559	561	569	507	802	101	14.705	15.0883	15.068	17.2952	20.9992	12.8723	0.0860049	0.60667	-0.139035	0.86873	0.00465511	0.824145	0.631508	0.000441256	0.553614
ENSG00000064692	SNCAIP	synuclein alpha interacting protein	9627	1	0	2	0	0	2	0.0302794	0	0.0609632	0	0	0.293401
ENSG00000064703	DDX20	DEAD-box helicase 20	11218	353	274	249	257	221	67	13.9115	11.0402	9.87844	13.134	8.66895	12.7926	0.0572123	-0.301197	0.220124	0.93317	0.312603	0.711249	0.758326	0.146298	0.380484
ENSG00000064726	BTBD1	BTB domain containing 1	53339	374	310	410	406	367	136	20.2454	17.1571	22.3423	28.5001	19.7741	35.6679	0.393652	0.10718	0.918141	0.201117	0.750274	0.00168384	0.0326452	0.561779	1.85594e-05
ENSG00000064763	FAR2	fatty acyl-CoA reductase 2	55711	58	40	49	32	30	7	2.35924	1.66353	2.00646	1.68795	1.21462	1.37952	-0.373739	-0.606881	-0.46324	0.636638	0.218615	0.795007	0.312876	0.0859526	0.507647
ENSG00000064787	BCAS1	brain enriched myelin associated protein 1	8537	2	0	0	0	2	0	0.053775	0	0	0	0.0535249	0
ENSG00000064835	POU1F1	POU class 1 homeobox 1	5449	0	0	0	0	0	0	0	0	0	0	0	0
ENSG00000064886	CHI3L2	chitinase 3 like 2	1117	1	3	0	0	0	0	0.0667985	0.204887	0	0	0	0
ENSG00000064932	SBNO2	strawberry notch homolog 2	22904	697	633	579	699	521	127	23.2088	21.5502	19.4084	30.1831	17.2677	20.4884	0.374663	-0.190096	0.0167939	0.198417	0.51824	1	0.0319961	0.311475	0.931079
ENSG00000064933	PMS1	PMS1 homolog 1, mismatch repair system component	5378	80	32	63	59	53	18	3.22847	1.32033	2.5594	3.08763	2.12891	3.51936	0.258383	-0.0365892	0.647324	0.698495	1	0.414727	0.380276	0.993006	0.123186
ENSG00000064961	HMG20B	high mobility group 20B	10362	1853	2068	1875	1379	2220	299	105.742	120.656	107.712	102.048	126.096	82.6661	-0.250781	0.295262	-0.353641	0.454505	0.20153	0.301547	0.156815	0.0762543	0.0651841
ENSG00000064989	CALCRL	calcitonin receptor like receptor	10203	2	4	2	3	1	2	0.0602274	0.123155	0.0606296	0.117152	0.0299736	0.291795
ENSG00000064995	TAF11	TATA-box binding protein associated factor 11	6882	385	354	358	248	361	56	42.6038	40.0513	39.8805	35.5881	39.7622	30.0234	-0.321514	0.0791317	-0.365774	0.375329	0.823453	0.484373	0.108362	0.662338	0.17204
ENSG00000064999	ANKS1A	ankyrin repeat and sterile alpha motif domain containing 1A	23294	522	432	357	503	333	87	13.52	11.4397	9.30816	16.8943	8.5847	10.9171	0.4439	-0.291787	0.0150686	0.117801	0.2916	1	0.0131419	0.131802	0.950438
ENSG00000065000	AP3D1	adaptor related protein complex 3 subunit delta 1	8943	2965	3113	2484	2551	2022	465	75.7691	81.3342	63.9013	84.5364	51.4309	57.5711	0.0753115	-0.400803	-0.277898	0.87499	0.0862135	0.429885	0.643647	0.0225814	0.133104
ENSG00000065029	ZNF76	zinc finger protein 76	7629	497	511	443	442	424	75	16.1295	16.9555	14.473	18.6017	13.6964	11.7926	0.107429	-0.093359	-0.348969	0.825553	0.805144	0.465544	0.552134	0.63699	0.155586
ENSG00000065054	NHERF2	NHERF family PDZ scaffold protein 2	9351	1033	1183	1150	670	1243	162	64.6656	75.7154	72.4705	54.3893	77.4497	49.1329	-0.508692	0.241947	-0.454324	0.0705707	0.324019	0.199186	0.0054354	0.154348	0.0283392
ENSG00000065057	NTHL1	nth like DNA glycosylase 1	4913	649	699	750	471	839	119	58.7842	64.7321	68.386	55.3226	75.6403	52.2212	-0.334382	0.357576	-0.216634	0.311792	0.126128	0.661538	0.0751675	0.0388114	0.326937
ENSG00000065060	BLTP3A	bridge-like lipid transfer protein family member 3A	54887	197	153	164	260	148	45	4.37625	3.47499	3.6675	7.48989	3.27245	4.8432	0.841564	-0.111639	0.413736	0.00153693	0.814412	0.451369	1.70428e-05	0.650039	0.147803
ENSG00000065135	GNAI3	G protein subunit alpha i3	2773	563	420	610	449	384	115	4.56029	3.47825	4.97399	4.71625	3.09593	4.51301	-0.00195553	-0.368323	0.135455	1	0.157768	0.8039	1	0.0537801	0.525301
ENSG00000065150	IPO5	importin 5	3843	2033	1659	1761	1362	1606	305	46.3023	38.6312	40.3752	40.2261	36.4071	33.655	-0.175833	-0.0789544	-0.232139	0.648108	0.824647	0.560567	0.323114	0.663739	0.227784
ENSG00000065154	OAT	ornithine aminotransferase	4942	804	729	675	607	450	137	52.2318	48.4209	44.1441	51.1368	29.0982	43.1204	-0.0387906	-0.611296	-0.0837687	0.975672	0.0101525	0.91828	0.849756	0.0012257	0.712386
ENSG00000065183	WDR3	WD repeat domain 3	10885	793	694	641	681	382	156	16.9852	15.1979	13.8212	18.9152	8.14398	16.1885	0.180982	-0.793738	0.157403	0.626184	0.000664904	0.747606	0.301216	3.47776e-05	0.432737
ENSG00000065243	PKN2	protein kinase N2	5586	117	73	98	161	40	35	3.73377	2.38183	3.14832	6.66275	1.27057	5.41145	0.986229	-1.16028	0.887015	0.000722031	0.00130371	0.0922397	5.71928e-06	8.33432e-05	0.0068902
ENSG00000065268	WDR18	WD repeat domain 18	57418	1982	2122	1887	1630	1776	387	185.083	202.598	177.388	197.386	165.075	175.088	-0.0564882	-0.0735862	-0.028425	0.933688	0.839153	1	0.759682	0.684888	0.896743
ENSG00000065308	TRAM2	translocation associated membrane protein 2	9697	489	411	334	427	294	78	15.2731	13.1246	10.5016	17.2946	9.13988	11.8031	0.294718	-0.38434	-0.0553349	0.373085	0.154501	0.982047	0.10719	0.0520782	0.841923
ENSG00000065320	NTN1	netrin 1	9423	70	63	47	53	18	7	2.40173	2.21	1.62336	2.35813	0.614714	1.16361	0.060041	-1.63225	-0.755275	0.970808	0.000181572	0.534287	0.840073	6.98634e-06	0.204899
ENSG00000065325	GLP2R	glucagon like peptide 2 receptor	9340	0	0	0	0	0	0	0	0	0	0	0	0
ENSG00000065328	MCM10	minichromosome maintenance 10 replication initiation factor	55388	307	275	263	257	214	94	12.3893	11.3466	10.6845	13.4495	8.59599	18.3789	0.106846	-0.297973	0.758061	0.837774	0.313944	0.0317681	0.57455	0.147294	0.00120112
ENSG00000065357	DGKA	diacylglycerol kinase alpha	1606	599	556	463	520	351	83	13.0561	12.3905	10.1592	14.6979	7.61499	8.76494	0.186519	-0.52119	-0.358118	0.620171	0.0382111	0.432427	0.296332	0.00707556	0.135701
ENSG00000065361	ERBB3	erb-b2 receptor tyrosine kinase 3	2065	426	374	318	329	331	62	10.3732	9.31107	7.79505	10.3888	8.02241	7.31438	0.0601358	-0.0719336	-0.244948	0.927218	0.866133	0.688002	0.747541	0.725944	0.354572
ENSG00000065371	ROPN1	rhophilin associated tail protein 1	54763	0	0	2	1	0	0	0	0	0.0980835	0.0631745	0	0
ENSG00000065413	ANKRD44	ankyrin repeat domain 44	91526	3	5	5	9	5	0	0.0514816	0.0877258	0.0863756	0.200281	0.0854036	0	1.26723	0.295627	-4.84393	0.291925	1	0.784493	0.0663539	0.960223	0.495011
ENSG00000065427	KARS1	lysyl-tRNA synthetase 1	3735	3906	3841	3052	2615	2268	544	211.492	212.634	166.355	183.611	122.231	142.707	-0.222568	-0.568801	-0.385159	0.518701	0.0104051	0.223477	0.202248	0.00126789	0.035379
ENSG00000065457	ADAT1	adenosine deaminase tRNA specific 1	23536	128	134	102	193	117	33	6.28019	6.72193	5.03794	12.2796	5.71379	7.84442	0.906737	0.0444604	0.461417	0.00132786	0.948021	0.474526	1.41452e-05	0.857814	0.16236
ENSG00000065485	PDIA5	protein disulfide isomerase family A member 5	10954	289	278	205	168	236	53	15.6403	15.3822	11.1684	11.7902	12.7126	13.8966	-0.375975	-0.0267115	0.0619056	0.320954	0.984896	0.975493	0.0791988	0.922599	0.827181
ENSG00000065491	TBC1D22B	TBC1 domain family member 22B	55633	135	139	118	114	103	30	8.58279	9.03517	7.55209	9.39865	6.5179	9.2406	0.0408341	-0.246113	0.217165	0.979769	0.500024	0.805046	0.86248	0.295973	0.526629
ENSG00000065518	NDUFB4	NADH:ubiquinone oxidoreductase subunit B4	4710	1397	1410	1279	875	1083	170	163.815	169.045	150.98	133.055	126.404	96.5808	-0.400875	-0.234075	-0.662039	0.17713	0.372727	0.0326543	0.0261257	0.190895	0.00126953
ENSG00000065526	SPEN	spen family transcriptional repressor	23013	1092	879	708	1066	809	232	17.8739	14.71	11.666	22.6266	13.1802	18.3979	0.497417	-0.0413697	0.399938	0.0546792	0.936012	0.227558	0.00349187	0.837708	0.0366191
ENSG00000065534	MYLK	myosin light chain kinase	4638	18	19	9	18	5	3	0.178726	0.192884	0.0899597	0.231768	0.0494152	0.144318	0.466338	-1.49718	-0.012591	0.665935	0.0791573	1	0.345957	0.0199083	1
ENSG00000065548	ZC3H15	zinc finger CCCH-type containing 15	55854	298	201	286	261	139	67	21.6755	14.9477	20.9416	24.6184	10.0634	23.6109	0.23747	-0.811714	0.378094	0.536915	0.00260991	0.430293	0.218568	0.000204853	0.134582
ENSG00000065559	MAP2K4	mitogen-activated protein kinase kinase 4	6416	278	223	248	222	158	35	10.7178	8.79009	9.62507	11.0989	6.0631	6.53754	0.0705261	-0.560583	-0.491672	0.913094	0.0471995	0.381166	0.720167	0.00949406	0.103411
ENSG00000065600	PACC1	proton activated chloride channel 1	55248	140	153	131	99	164	36	10.5745	11.8155	9.9608	9.69691	12.3297	13.174	-0.276289	0.310517	0.366173	0.593397	0.314598	0.566676	0.268198	0.147758	0.23578
ENSG00000065609	SNAP91	synaptosome associated protein 91	9892	0	0	0	0	2	0	0	0	0	0	0.065878	0
ENSG00000065613	SLK	STE20 like kinase	9748	118	75	90	139	68	39	3.20364	2.08185	2.45977	4.89376	1.83758	5.12992	0.799833	-0.371085	1.06842	0.0119044	0.353933	0.0275463	0.00031411	0.176612	0.000982205
ENSG00000065615	CYB5R4	cytochrome b5 reductase 4	51167	49	38	60	45	30	12	1.12098	0.888816	1.38179	1.335	0.683122	1.33005	0.11538	-0.608184	0.310423	0.911649	0.208536	0.81476	0.717358	0.0801332	0.539318
ENSG00000065618	COL17A1	collagen type XVII alpha 1 chain	1308	70	75	71	71	69	11	2.20447	2.41488	2.2509	2.89955	2.16288	1.67835	0.216814	0.0350342	-0.369693	0.727534	0.971759	0.797378	0.415866	0.900445	0.513029
ENSG00000065621	GSTO2	glutathione S-transferase omega 2	119391	1447	1356	1432	1149	1726	317	32.0861	30.7421	31.9655	33.0395	38.0947	34.0558	-0.0589551	0.387204	0.185727	0.930339	0.081624	0.648892	0.752972	0.0208013	0.310538
ENSG00000065665	SEC61A2	SEC61 translocon subunit alpha 2	55176	118	76	117	86	92	25	6.63226	4.36736	6.61996	6.26821	5.14686	6.80775	-0.0289849	-0.0724919	0.290703	1	0.927104	0.727602	0.934092	0.822268	0.400476
ENSG00000065675	PRKCQ	protein kinase C theta	5588	84	100	70	66	88	18	5.61107	6.82957	4.70712	5.71711	5.85093	5.82536	-0.122212	0.151556	0.105467	0.901356	0.757041	0.980196	0.694893	0.572513	0.838357
ENSG00000065717	TLE2	TLE family member 2, transcriptional corepressor	7089	354	334	320	270	305	41	18.7749	18.1112	17.085	18.5696	16.1009	10.5352	-0.0770941	-0.0421174	-0.693443	0.914688	0.947285	0.141301	0.722647	0.855948	0.0148381
ENSG00000065802	ASB1	ankyrin repeat and SOCS box containing 1	51665	480	429	445	411	460	92	14.2633	13.0336	13.3116	15.8375	13.6055	13.245	0.103806	0.125438	0.0469172	0.834471	0.683649	0.97952	0.565419	0.48303	0.834636
ENSG00000065809	FAM107B	family with sequence similarity 107 member B	83641	125	116	144	189	124	42	3.91974	3.71904	4.54569	7.68554	3.87029	6.38087	0.795622	0.0472895	0.72815	0.00695349	0.9513	0.146798	0.000134411	0.863223	0.015814
ENSG00000065833	ME1	malic enzyme 1	4199	261	270	291	279	292	88	17.2098	18.2023	19.3161	23.8564	19.1643	28.1127	0.262681	0.187558	0.70032	0.47692	0.535856	0.0593798	0.172378	0.328136	0.00320104
ENSG00000065882	TBC1D1	TBC1 domain family member 1	23216	544	573	519	342	510	83	13.2523	14.2717	12.7277	10.804	12.3663	9.79616	-0.436159	-0.000638289	-0.376439	0.167332	1	0.397719	0.0237528	1	0.11236
ENSG00000065883	CDK13	cyclin dependent kinase 13	8621	211	147	167	174	96	43	1.88648	1.34373	1.50306	2.01736	0.854311	1.86261	0.23306	-0.764885	0.318817	0.594901	0.00903276	0.619633	0.269434	0.00104266	0.283359
ENSG00000065911	MTHFD2	methylenetetrahydrofolate dehydrogenase (NADP+ dependent) 2, methenyltetrahydrofolate cyclohydrolase	10797	1730	1451	1721	1709	1615	567	78.9661	67.7156	79.0799	101.159	73.3741	125.39	0.304128	0.0816672	0.81489	0.298052	0.792132	0.000363004	0.0695454	0.621323	2.66049e-06
ENSG00000065923	SLC9A7	solute carrier family 9 member A7	84679	242	234	249	243	289	80	5.33712	5.27635	5.52817	6.94966	6.34402	8.54802	0.245487	0.354697	0.744879	0.535683	0.179205	0.0472742	0.217601	0.0641521	0.00226423
ENSG00000065970	FOXJ2	forkhead box J2	55810	494	383	355	445	307	96	17.2669	13.6872	12.4913	20.1704	10.6808	16.2571	0.357351	-0.318863	0.247197	0.252127	0.249162	0.610539	0.0496844	0.103976	0.274767
ENSG00000065978	YBX1	Y-box binding protein 1	4904	16256	15384	15082	9998	11633	2788	1053.89	1019.71	984.309	840.545	750.671	875.707	-0.401188	-0.323536	-0.141069	0.152973	0.172047	0.735538	0.0203146	0.0604865	0.419128
ENSG00000065989	PDE4A	phosphodiesterase 4A	5141	735	682	554	689	554	97	23.924	22.6964	18.1529	29.0825	17.9487	15.2969	0.307916	-0.147475	-0.417829	0.318367	0.640914	0.308282	0.0780073	0.435075	0.06907
ENSG00000066027	PPP2R5A	protein phosphatase 2 regulatory subunit B'alpha	5525	161	137	209	131	204	30	8.98941	7.82082	11.7474	9.48511	11.3373	8.11541	-0.129456	0.368339	-0.153412	0.836377	0.192506	0.912974	0.568192	0.0715757	0.704338
ENSG00000066032	CTNNA2	catenin alpha 2	1496	0	0	0	0	0	0	0	0	0	0	0	0
ENSG00000066044	ELAVL1	ELAV like RNA binding protein 1	1994	2095	1908	1916	1478	1146	346	66.2326	61.6727	60.9781	60.5938	36.0619	52.9966	-0.17792	-0.685774	-0.17019	0.640786	0.001947	0.705651	0.315856	0.000139554	0.373509
ENSG00000066056	TIE1	tyrosine kinase with immunoglobulin like and EGF like domains 1	7075	0	0	0	1	0	1	0	0	0	0.0425686	0	0.15904
ENSG00000066084	DIP2B	disco interacting protein 2 homolog B	57609	381	332	351	365	238	71	8.10149	7.21779	7.51341	10.0646	5.03723	7.31446	0.280495	-0.477003	0.0211045	0.415289	0.0755668	1	0.132826	0.0185762	0.927517
ENSG00000066117	SMARCD1	SWI/SNF related, matrix associated, actin dependent regulator of chromatin, subfamily d, member 1	6602	1516	1479	1087	1211	811	198	68.0549	67.882	49.1224	70.4969	36.2374	43.0635	0.070809	-0.648392	-0.439221	0.888878	0.00427103	0.204902	0.670129	0.000390403	0.0295239
ENSG00000066135	KDM4A	lysine demethylase 4A	9682	529	580	451	541	444	102	22.4602	25.1774	19.2763	29.7865	18.7636	20.9817	0.293824	-0.132003	-0.0106347	0.361681	0.693457	1	0.100749	0.493341	0.992068
ENSG00000066136	NFYC	nuclear transcription factor Y subunit gamma	4802	814	981	701	640	731	151	29.9102	36.8545	25.9301	30.4959	26.7355	26.8817	-0.143124	-0.0921926	-0.124116	0.751025	0.793275	0.82968	0.442363	0.623015	0.56489
ENSG00000066185	ZMYND12	zinc finger MYND-type containing 12	84217	7	0	5	2	1	1	0.706422	0	0.507957	0.261735	0.100448	0.488934
ENSG00000066230	SLC9A3	solute carrier family 9 member A3	6550	0	2	2	1	0	0	0	0.0782184	0.0770145	0.0496042	0	0
ENSG00000066248	NGEF	neuronal guanine nucleotide exchange factor	25791	112	112	113	96	155	16	5.30478	5.42368	5.38788	5.89639	7.30729	3.67158	0.0109382	0.560729	-0.470706	1	0.0460661	0.632705	0.953136	0.00917628	0.295781
ENSG00000066279	ASPM	assembly factor for spindle microtubules	259266	139	63	120	116	43	38	2.80989	1.30209	2.442	3.04087	0.865203	3.7217	0.354773	-1.21515	0.846697	0.38786	0.000441386	0.0978853	0.115607	2.06393e-05	0.00771575
ENSG00000066294	CD84	CD84 molecule	8832	0	0	0	0	0	0	0	0	0	0	0	0
ENSG00000066322	ELOVL1	ELOVL fatty acid elongase 1	64834	1854	1657	1536	1577	1545	297	162.836	148.796	135.807	179.613	135.066	126.381	0.146244	-0.0241784	-0.159847	0.700371	0.975559	0.732586	0.382233	0.906864	0.411771
ENSG00000066336	SPI1	Spi-1 proto-oncogene	6688	0	0	0	0	0	0	0	0	0	0	0	0
ENSG00000066379	POLR1H	RNA polymerase I subunit H	30834	385	383	411	320	472	100	23.077	23.4717	24.8	24.8734	28.1603	29.0405	-0.0592882	0.360445	0.365023	0.94221	0.144881	0.393402	0.776238	0.0468904	0.110084
ENSG00000066382	MPPED2	metallophosphoesterase domain containing 2	744	0	0	0	0	0	0	0	0	0	0	0	0
ENSG00000066405	CLDN18	claudin 18	51208	0	0	0	0	0	0	0	0	0	0	0	0
ENSG00000066422	ZBTB11	zinc finger and BTB domain containing 11	27107	81	78	86	133	28	35	2.52774	2.48868	2.7017	5.38227	0.869724	5.29176	0.940345	-1.44348	1.11649	0.00262864	0.000168777	0.025656	3.49432e-05	6.38126e-06	0.000881378
ENSG00000066427	ATXN3	ataxin 3	4287	42	42	52	46	62	20	0.956862	0.978308	1.1926	1.35901	1.40594	2.20757	0.257948	0.547125	1.15678	0.724177	0.160393	0.0922397	0.411737	0.054943	0.00691586
ENSG00000066455	GOLGA5	golgin A5	9950	109	68	105	99	95	25	7.48549	4.77452	7.25895	8.81648	6.49371	8.31798	0.315073	0.114955	0.431874	0.515938	0.796435	0.582549	0.200723	0.626937	0.249169
ENSG00000066468	FGFR2	fibroblast growth factor receptor 2	2263	141	113	85	98	103	25	4.09531	3.35562	2.48529	3.69113	2.97769	3.51796	0.0352223	-0.0337672	0.166722	0.985652	0.986588	0.871481	0.877657	0.925231	0.626279
ENSG00000066557	LRRC40	leucine rich repeat containing 40	55631	17	6	22	32	16	4	1.31612	0.474923	1.71458	3.21263	1.23294	1.50034	1.32483	0.189955	0.430973	0.0209943	0.85686	0.91828	0.000778346	0.711188	0.712322
ENSG00000066583	ISOC1	isochorismatase domain containing 1	51015	347	297	331	251	242	61	39.328	34.4156	37.7651	36.8903	27.3001	33.4955	-0.133524	-0.326975	-0.0718194	0.800535	0.254242	0.967622	0.512567	0.107386	0.812363
ENSG00000066629	EML1	EMAP like 1	2009	60	75	76	46	64	14	1.47801	1.88893	1.88465	1.46944	1.56922	1.67086	-0.375663	-0.0408004	0.00984741	0.511345	0.977268	1	0.198062	0.910028	1
ENSG00000066651	TRMT11	tRNA methyltransferase 11 homolog	60487	29	25	44	20	25	15	1.11551	0.983197	1.70379	0.997631	0.957171	2.79544	-0.46779	-0.287681	1.21358	0.603979	0.673004	0.132657	0.277701	0.471238	0.0133455
ENSG00000066654	THUMPD1	THUMP domain containing 1	55623	259	175	200	225	106	37	8.76883	6.05768	6.81651	9.87848	3.5721	6.06915	0.332309	-0.893481	-0.169171	0.348139	0.00147462	0.859665	0.0938371	9.72592e-05	0.60884
ENSG00000066697	MSANTD3	Myb/SANT DNA binding domain containing 3	91283	347	319	419	262	432	65	23.4783	22.0676	28.5392	22.9882	29.0936	21.3076	-0.227561	0.352847	-0.136112	0.580924	0.157419	0.866838	0.256836	0.053556	0.61985
ENSG00000066735	KIF26A	kinesin family member 26A	26153	243	237	182	233	122	32	7.9166	7.89418	5.9689	9.8436	3.9561	5.05087	0.316937	-0.75663	-0.444182	0.378583	0.00682948	0.481325	0.110135	0.000726744	0.169541
ENSG00000066739	ATG2B	autophagy related 2B	55102	18	10	20	14	12	3	0.277905	0.157852	0.310846	0.280297	0.184409	0.224403	0.0459557	-0.314137	-0.0728067	1	0.84699	1	0.976023	0.695754	1
ENSG00000066777	ARFGEF1	ADP ribosylation factor guanine nucleotide exchange factor 1	10565	98	94	94	118	75	21	1.95044	1.91276	1.88332	3.04547	1.48574	2.02493	0.545197	-0.248506	0.157776	0.148804	0.563572	0.89208	0.0193137	0.355122	0.662392
ENSG00000066813	ACSM2B	acyl-CoA synthetase medium chain family member 2B	348158	0	0	0	0	0	0	0	0	0	0	0	0
ENSG00000066827	ZFAT	zinc finger and AT-hook domain containing	57623	99	109	73	124	84	22	2.44831	2.75604	1.81738	3.97667	2.0677	2.63596	0.64167	-0.0602658	0.249772	0.0671643	0.938635	0.784493	0.00494872	0.842138	0.49386
ENSG00000066855	MTFR1	mitochondrial fission regulator 1	9650	137	122	143	100	116	41	6.51411	5.93091	6.84481	6.16596	5.48995	9.44502	-0.183687	-0.110502	0.631753	0.751025	0.823458	0.224748	0.442584	0.662397	0.0357466
ENSG00000066923	STAG3	STAG3 cohesin complex component	10734	4	7	2	4	2	2	0.102575	0.18353	0.0516301	0.133017	0.0510491	0.248483	0.119015	-0.976879	1.19593	1	0.682509	0.801913	0.960223	0.482133	0.522284
ENSG00000066926	FECH	ferrochelatase	2235	498	378	480	390	391	113	12.4955	9.6971	12.1243	12.6898	9.76508	13.7368	0.0275947	-0.10953	0.342877	0.986912	0.759288	0.402804	0.88031	0.574999	0.114773
ENSG00000066933	MYO9A	myosin IXA	4649	48	46	47	44	63	20	0.519924	0.509428	0.512491	0.61804	0.679226	1.04957	0.142583	0.51877	1.10542	0.871212	0.18657	0.107102	0.635613	0.0683966	0.00907903
ENSG00000067048	DDX3Y	DEAD-box helicase 3 Y-linked	8653	0	1	0	0	0	0	0	0.0393416	0	0	0	0
ENSG00000067057	PFKP	phosphofructokinase, platelet	5214	1982	1922	1500	2002	1199	339	78.5452	77.8746	59.8408	102.884	47.2945	65.0878	0.391158	-0.489245	-0.0683651	0.146899	0.0344809	0.930287	0.0188651	0.00615047	0.732422
ENSG00000067064	IDI1	isopentenyl-diphosphate delta isomerase 1	3422	277	152	342	234	458	71	14.0318	7.87231	17.4401	15.3714	23.0926	17.4251	0.106038	0.933729	0.487751	0.843761	1.37491e-05	0.265609	0.582936	2.92064e-07	0.0501587
ENSG00000067066	SP100	SP100 nuclear antigen	6672	87	85	87	76	97	20	1.3548	1.35333	1.36385	1.53475	1.5035	1.50894	0.0538783	0.264729	0.230104	0.976912	0.479488	0.841338	0.854814	0.2777	0.581181
ENSG00000067082	KLF6	KLF transcription factor 6	1316	211	153	199	229	248	47	7.56496	5.60844	7.18237	10.647	8.85017	8.16406	0.52734	0.501493	0.345307	0.0890136	0.0534526	0.546931	0.00811053	0.0112868	0.216105
ENSG00000067113	PLPP1	phospholipid phosphatase 1	8611	115	108	109	88	87	17	13.0809	12.56	12.4812	12.9804	9.84999	9.36858	-0.0922822	-0.249428	-0.361252	0.929401	0.552125	0.737332	0.751406	0.344005	0.421994
ENSG00000067141	NEO1	neogenin 1	4756	593	559	509	447	326	63	16.0403	15.4595	13.8601	15.6795	8.77709	8.25624	-0.0701133	-0.666197	-0.794151	0.915577	0.00583923	0.0335868	0.725489	0.000596477	0.00132373
ENSG00000067167	TRAM1	translocation associated membrane protein 1	23471	341	304	367	338	228	78	18.1686	16.5603	19.6844	23.3534	12.0914	20.1347	0.24101	-0.467544	0.228052	0.512299	0.0819939	0.667122	0.198588	0.0209253	0.332956
ENSG00000067177	PHKA1	phosphorylase kinase regulatory subunit alpha 1	5255	217	159	137	173	116	42	7.52156	5.63472	4.78034	7.77607	4.00204	7.05313	0.258489	-0.458435	0.318627	0.534033	0.138429	0.619251	0.21636	0.044113	0.282806
ENSG00000067182	TNFRSF1A	TNF receptor superfamily member 1A	7132	1894	1793	1661	1931	1743	366	104.088	100.746	91.8924	137.616	95.3438	97.4506	0.353783	0.0651667	0.0568991	0.205359	0.843027	0.934638	0.0339975	0.690528	0.744174
ENSG00000067191	CACNB1	calcium voltage-gated channel auxiliary subunit beta 1	782	107	94	94	86	115	16	3.31842	2.98059	2.93471	3.45869	3.54994	2.40409	0.0455057	0.323557	-0.277681	0.987257	0.332089	0.828288	0.88286	0.160898	0.562478
ENSG00000067208	EVI5	ecotropic viral integration site 5	7813	51	26	42	48	24	19	1.35635	0.706971	1.12445	1.65542	0.635314	2.44816	0.514396	-0.622543	1.27797	0.345624	0.218911	0.0719279	0.0926282	0.0861169	0.00446846
ENSG00000067221	STOML1	stomatin like 1	9399	88	110	94	84	106	12	1.85206	2.36697	1.99155	2.29255	2.22052	1.2236	0.0234452	0.217957	-0.679954	1	0.58586	0.435144	0.949586	0.376563	0.137548
ENSG00000067225	PKM	pyruvate kinase M1/2	5315	61235	60277	51675	49459	45221	9454	1572.5	1582.59	1335.86	1647.03	1155.86	1176.22	0.0150591	-0.255039	-0.269645	1	0.299888	0.40733	0.912813	0.137244	0.117274
ENSG00000067248	DHX29	DExH-box helicase 29	54505	111	73	72	112	48	21	4.99003	3.35529	3.25839	6.52927	2.14782	4.57387	0.633104	-0.727951	0.320852	0.0772818	0.0535427	0.735255	0.00621558	0.0113174	0.415236
ENSG00000067334	DNTTIP2	deoxynucleotidyltransferase terminal interacting protein 2	30836	348	243	271	325	196	91	10.1882	7.27365	7.98692	12.3387	5.71151	12.9076	0.419623	-0.450422	0.68552	0.174263	0.108965	0.0642297	0.0253936	0.0315325	0.00371055
ENSG00000067365	METTL22	methyltransferase 22, Kin17 lysine	79091	154	178	145	126	140	35	4.10656	4.85293	3.89239	4.35706	3.71587	4.52178	-0.0990623	-0.0879293	0.155243	0.904015	0.854114	0.866838	0.700204	0.706503	0.619867
ENSG00000067369	TP53BP1	tumor protein p53 binding protein 1	7158	986	871	683	795	568	169	16.7054	15.0877	11.649	17.4668	9.57863	13.8724	0.149557	-0.476259	0.018175	0.704713	0.0496071	1	0.388039	0.0102694	0.917257
ENSG00000067445	TRO	trophinin	7216	0	0	0	0	0	0	0	0	0	0	0	0
ENSG00000067533	RRP15	ribosomal RNA processing 15 homolog	51018	125	114	102	110	109	20	3.49278	3.25681	2.86914	3.98584	3.03154	2.70754	0.191368	0.0374977	-0.165086	0.730316	0.952203	0.921162	0.418648	0.865766	0.717054
ENSG00000067560	RHOA	ras homolog family member A	387	8629	8302	8817	6203	6230	1350	760.309	747.892	782.061	708.757	546.378	576.298	-0.230916	-0.365506	-0.328388	0.489296	0.116738	0.296636	0.181239	0.0347563	0.0625572
ENSG00000067596	DHX8	DEAH-box helicase 8	1659	1287	1196	991	1134	707	210	27.1357	25.7823	21.0343	31.0057	14.8374	21.4519	0.209074	-0.613318	-0.121315	0.53738	0.00762406	0.824955	0.219009	0.000836763	0.558006
ENSG00000067601	PMS2P4	PMS1 homolog 2, mismatch repair system component pseudogene 4		8	7	7	5	5	3	2.08627	1.8664	1.83767	1.69089	1.29785	3.7904	-0.308078	-0.445951	1.03572	1	0.786457	0.6683	0.947457	0.612794	0.334822
ENSG00000067606	PRKCZ	protein kinase C zeta	5590	516	495	450	341	615	76	14.7592	14.4759	12.9574	12.6483	17.5091	10.532	-0.275735	0.434043	-0.338862	0.454526	0.0627981	0.479857	0.156893	0.0142378	0.166081
ENSG00000067646	ZFY	zinc finger protein Y-linked	7544	0	0	0	0	0	0	0	0	0	0	0	0
ENSG00000067704	IARS2	isoleucyl-tRNA synthetase 2, mitochondrial	55699	664	632	607	523	642	134	35.3439	34.3946	32.5256	36.1006	34.0139	34.5569	-0.0401868	0.114686	0.0977347	0.974123	0.711072	0.880706	0.846373	0.514328	0.642879
ENSG00000067715	SYT1	synaptotagmin 1	6857	97	90	88	101	57	7	3.34165	3.16999	3.05184	4.51208	1.95452	1.16835	0.377856	-0.586848	-1.36611	0.381607	0.108533	0.117075	0.111946	0.0313363	0.0108047
ENSG00000067798	NAV3	neuron navigator 3	89795	15	16	7	21	16	2	0.248646	0.271166	0.116809	0.451413	0.263988	0.160621	0.960547	0.430817	-0.317667	0.215582	0.581285	1	0.0366793	0.372224	1
ENSG00000067829	IDH3G	isocitrate dehydrogenase (NAD(+)) 3 non-catalytic subunit gamma	3421	1611	1617	1471	1232	1458	269	130.505	133.927	119.96	129.422	117.562	105.577	-0.108848	-0.00672747	-0.201629	0.821693	1	0.640723	0.546931	0.987515	0.302899
ENSG00000067836	ROGDI	rogdi atypical leucine zipper	79641	154	181	188	94	272	23	9.20325	11.0592	11.3102	7.28474	16.1795	6.65935	-0.654913	0.736066	-0.583382	0.0690146	0.00227218	0.371342	0.00517264	0.000171306	0.0978339
ENSG00000067840	PDZD4	PDZ domain containing 4	57595	6	1	2	1	2	0	0.304217	0.0518393	0.102083	0.0657504	0.100934	0
ENSG00000067842	ATP2B3	ATPase plasma membrane Ca2+ transporting 3	492	0	0	0	0	0	0	0	0	0	0	0	0
ENSG00000067900	ROCK1	Rho associated coiled-coil containing protein kinase 1	6093	142	98	75	137	48	41	2.82206	1.99127	1.50048	3.53073	0.9495	3.94772	0.625361	-1.02612	0.986975	0.0662853	0.00275004	0.0378768	0.00483524	0.00022173	0.00159351
ENSG00000067955	CBFB	core-binding factor subunit beta	865	229	167	308	210	141	73	10.8347	8.0784	14.6698	12.8845	6.64013	16.7336	0.078587	-0.63649	0.656388	0.907017	0.0236468	0.109024	0.707099	0.00365996	0.00941121
ENSG00000067992	PDK3	pyruvate dehydrogenase kinase 3	5165	126	107	106	84	96	18	2.04594	1.77637	1.73268	1.76875	1.55156	1.41605	-0.1883	-0.136584	-0.307918	0.764947	0.779306	0.767348	0.460093	0.601164	0.460889
ENSG00000068001	HYAL2	hyaluronidase 2	8692	1104	1134	939	911	922	166	54.963	57.722	47.0606	58.8147	45.6886	40.04	0.0203518	-0.103176	-0.333327	0.993778	0.759288	0.390633	0.895863	0.574971	0.108735
ENSG00000068024	HDAC4	histone deacetylase 4	9759	108	146	118	155	93	25	1.77819	2.45773	1.95582	3.30943	1.5241	1.99425	0.556533	-0.320441	0.0272446	0.103329	0.372465	1	0.0105814	0.190704	0.9648
ENSG00000068028	RASSF1	Ras association domain family member 1	11186	323	395	337	295	432	57	19.3029	24.1348	20.2741	22.8617	25.6968	16.5036	-0.0184467	0.390881	-0.287462	1	0.112633	0.61888	0.949491	0.0329095	0.282403
ENSG00000068078	FGFR3	fibroblast growth factor receptor 3	2261	389	369	292	283	294	30	17.6607	17.1282	13.3454	16.6614	13.2856	6.5988	-0.0675189	-0.15333	-1.20194	0.925955	0.645141	0.00408423	0.744497	0.440836	5.62025e-05
ENSG00000068079	IFI35	interferon induced protein 35	3430	309	307	291	216	442	73	34.471	35.0155	32.6797	31.2474	49.0787	39.455	-0.247312	0.64451	0.289904	0.551474	0.00445334	0.56617	0.230481	0.000415883	0.233272
ENSG00000068097	HEATR6	HEAT repeat containing 6	63897	374	361	297	428	288	60	16.91	16.688	13.5182	25.0946	12.961	13.1434	0.553631	-0.158534	-0.178154	0.0420078	0.639431	0.797529	0.00235022	0.433207	0.513556
ENSG00000068120	COASY	Coenzyme A synthase	80347	2710	2684	2354	2162	2314	460	147.935	149.8	129.359	153.046	125.73	121.659	-0.0185774	-0.0614116	-0.148698	1	0.872712	0.740592	0.930671	0.73548	0.426644
ENSG00000068137	PLEKHH3	pleckstrin homology, MyTH4 and FERM domain containing H3	79990	701	688	614	647	527	108	32.1238	32.2348	28.3249	38.4485	24.0378	23.9782	0.192636	-0.244099	-0.287457	0.596307	0.370811	0.536861	0.271395	0.189493	0.206353
ENSG00000068305	MEF2A	myocyte enhancer factor 2A	4205	83	53	82	124	85	16	2.63803	1.72228	2.62365	5.11081	2.68904	2.4638	1.00986	0.324985	0.159169	0.0013801	0.392185	0.935604	1.50271e-05	0.205969	0.74667
ENSG00000068308	OTUD5	OTU deubiquitinase 5	55593	1062	1043	978	1022	1042	209	65.0744	65.3426	60.3274	81.2087	63.5519	62.0463	0.229795	0.116909	0.0425264	0.486625	0.691697	0.968491	0.179177	0.491469	0.815463
ENSG00000068323	TFE3	transcription factor binding to IGHM enhancer 3	7030	331	321	303	337	286	60	17.3172	17.1704	15.9581	22.8636	14.8933	15.2084	0.320128	-0.0573234	-0.066904	0.341038	0.91188	0.97952	0.090014	0.797058	0.835971
ENSG00000068354	TBC1D25	TBC1 domain family member 25	4943	194	191	177	160	159	22	10.7664	10.8375	9.88856	11.5148	8.78298	5.91529	0.0103979	-0.139399	-0.748741	1	0.721372	0.212761	0.963776	0.527898	0.0321203
ENSG00000068366	ACSL4	acyl-CoA synthetase long chain family member 4	2182	101	72	102	143	66	32	3.396	2.47517	3.45252	6.23516	2.20885	5.21291	0.880368	-0.37444	0.822892	0.00474653	0.35272	0.146798	7.73527e-05	0.17568	0.0158112
ENSG00000068383	INPP5A	inositol polyphosphate-5-phosphatase A	3632	131	141	173	74	129	43	7.71148	8.48618	10.2519	5.6489	7.55843	12.2636	-0.766157	-0.106032	0.551818	0.0395005	0.834644	0.298726	0.00212939	0.677442	0.0635483
ENSG00000068394	GPKOW	G-patch domain and KOW motifs	27238	517	630	513	389	578	106	68.6322	85.5076	68.556	66.9658	76.3732	68.1754	-0.273353	0.156983	-0.0465854	0.446787	0.584602	0.991417	0.152451	0.375481	0.865547
ENSG00000068400	GRIPAP1	GRIP1 associated protein 1	56850	290	316	250	286	238	52	9.3304	10.3948	8.09716	11.9326	7.62175	8.10569	0.240253	-0.165481	-0.116481	0.528283	0.625804	0.912313	0.211666	0.419251	0.703158
ENSG00000068438	FTSJ1	FtsJ RNA 2'-O-methyltransferase 1	24140	894	1016	945	825	772	148	68.5133	79.6082	72.9054	81.9893	58.8885	54.952	0.0293415	-0.207277	-0.346856	0.977997	0.453169	0.375902	0.856893	0.255373	0.100391
ENSG00000068489	PRR11	proline rich 11	55771	585	430	513	441	626	92	31.5586	23.7168	27.8593	30.8508	33.6133	24.0455	0.0335067	0.397954	-0.124986	0.973227	0.0895058	0.860342	0.844844	0.0239041	0.609607
ENSG00000068615	REEP1	receptor accessory protein 1	65055	80	50	82	61	76	18	3.01199	1.92469	3.1079	2.97823	2.84808	3.28337	0.0278626	0.203902	0.368912	1	0.637483	0.708939	0.940066	0.431537	0.376822
ENSG00000068650	ATP11A	ATPase phospholipid transporting 11A	23250	433	409	315	424	196	78	6.93976	6.70203	5.08227	8.81228	3.12671	6.05669	0.375786	-0.877773	0.0358959	0.222754	0.000462625	0.99537	0.0393428	2.18488e-05	0.879144
ENSG00000068654	POLR1A	RNA polymerase I subunit A	25885	1785	1573	1319	1623	1164	335	29.0613	26.1838	21.6179	34.2659	18.8628	26.4245	0.298282	-0.322097	0.124394	0.3128	0.191166	0.783065	0.0755569	0.0707838	0.491291
ENSG00000068697	LAPTM4A	lysosomal protein transmembrane 4 alpha	9741	680	555	767	549	586	132	96.8103	80.7852	109.925	101.356	83.0397	91.048	-0.0426413	-0.0893964	0.00361229	0.967546	0.805144	1	0.833882	0.637092	0.970541
ENSG00000068724	TTC7A	tetratricopeptide repeat domain 7A	57217	455	427	402	405	324	63	13.9479	13.383	12.4055	16.0997	9.88594	9.35669	0.158801	-0.30384	-0.422941	0.701527	0.272738	0.373204	0.383333	0.11948	0.099197
ENSG00000068745	IP6K2	inositol hexakisphosphate kinase 2	51447	888	939	896	752	975	168	34.7528	37.5724	35.3	38.1646	37.9802	31.8544	-0.0349268	0.198853	-0.0946553	0.979769	0.442489	0.891088	0.86458	0.246731	0.659238
ENSG00000068781	STON1-GTF2A1L	STON1-GTF2A1L readthrough	286749	0	0	0	0	0	0	0	0	0	0	0	0
ENSG00000068784	SRBD1	S1 RNA binding domain 1	55133	101	101	107	104	69	27	4.40638	4.50515	4.69932	5.88383	2.9963	5.70701	0.251183	-0.480597	0.407913	0.615392	0.18657	0.579997	0.291623	0.0683825	0.246752
ENSG00000068796	KIF2A	kinesin family member 2A	3796	125	116	126	87	122	28	5.76301	5.46795	5.84791	5.20145	5.59854	6.25434	-0.253275	0.0932721	0.21312	0.648108	0.850001	0.801913	0.323159	0.700272	0.521723
ENSG00000068831	RASGRP2	RAS guanyl releasing protein 2	10235	95	127	114	59	77	4	3.43682	4.69746	4.15172	2.7679	2.77268	0.701095	-0.688537	-0.445683	-2.46059	0.100734	0.204293	0.00217735	0.0101351	0.0778259	2.58897e-05
ENSG00000068878	PSME4	proteasome activator subunit 4	23198	294	239	258	212	383	66	6.22688	5.17544	5.50089	5.8227	8.07416	6.77253	-0.0746399	0.637495	0.344145	0.923206	0.00574582	0.486362	0.737922	0.000585713	0.173947
ENSG00000068885	IFT80	intraflagellar transport 80	57560	24	5	16	23	19	3	0.746105	0.158922	0.500725	0.927219	0.587919	0.45185	0.851838	0.437716	0.0211268	0.229363	0.554198	1	0.0413068	0.345957	1
ENSG00000068903	SIRT2	sirtuin 2	22933	322	355	290	274	283	71	11.387	12.8353	10.3238	12.5652	9.96126	12.1645	0.00230107	-0.0918932	0.156476	1	0.824774	0.801913	0.990947	0.663896	0.520432
ENSG00000068912	ERLEC1	endoplasmic reticulum lectin 1	27248	151	88	150	109	131	31	12.8222	7.64005	12.8224	12.0027	11.0722	12.7536	-0.00908382	0.115178	0.279144	1	0.774802	0.729117	1	0.594204	0.407304
ENSG00000068971	PPP2R5B	protein phosphatase 2 regulatory subunit B'beta	5526	128	111	104	125	104	19	8.3848	7.43417	6.85814	10.6184	6.78097	6.03004	0.367592	-0.0381991	-0.246996	0.358727	0.969542	0.833044	0.0989196	0.896203	0.568955
ENSG00000068976	PYGM	glycogen phosphorylase, muscle associated	5837	13	5	10	6	4	2	0.614279	0.241557	0.475678	0.367654	0.18813	0.457864	-0.391825	-1.10124	0.117569	0.917439	0.361185	1	0.728926	0.181692	0.966321
ENSG00000068985	PAGE1	PAGE family member 1	8712	0	0	0	0	0	0	0	0	0	0	0	0
ENSG00000069011	PITX1	paired like homeodomain 1	5307	465	508	472	423	473	90	29.7347	33.2125	30.3839	35.0766	30.1056	27.8829	0.0488523	0.0691712	-0.0812374	0.942792	0.853617	0.939545	0.778228	0.705645	0.752713
ENSG00000069018	TRPC7	transient receptor potential cation channel subfamily C member 7	57113	0	0	0	0	0	0	0	0	0	0	0	0
ENSG00000069020	MAST4	microtubule associated serine/threonine kinase family member 4	375449	37	22	25	30	15	5	0.554939	0.33736	0.377463	0.583487	0.223929	0.363327	0.338222	-0.796398	-0.141973	0.65923	0.214117	1	0.338599	0.0834044	1
ENSG00000069122	ADGRF5	adhesion G protein-coupled receptor F5	221395	0	1	0	0	0	0	0	0.0340909	0	0	0	0
ENSG00000069188	SDK2	sidekick cell adhesion molecule 2	54549	8	2	3	3	1	0	0.147188	0.0376217	0.055564	0.0715763	0.0183129	0
ENSG00000069206	ADAM7	ADAM metallopeptidase domain 7	8756	0	0	0	0	0	0	0	0	0	0	0	0
ENSG00000069248	NUP133	nucleoporin 133	55746	354	311	340	281	319	88	12.813	11.5089	12.3884	13.1892	11.4925	15.4317	-0.0147022	0.0274093	0.412661	1	0.964049	0.331994	0.965299	0.887479	0.0789512
ENSG00000069275	NUCKS1	nuclear casein kinase and cyclin dependent kinase substrate 1	64710	1453	1156	1596	1551	1390	381	49.5901	40.338	54.8344	68.6447	47.2193	62.9997	0.385469	0.0865201	0.462651	0.158266	0.780897	0.114866	0.0217154	0.603324	0.0104354
ENSG00000069329	VPS35	VPS35 retromer complex component	55737	945	880	977	694	618	200	21.3701	20.3463	22.2413	20.3517	13.9104	21.9124	-0.190521	-0.498656	0.117027	0.624298	0.0368821	0.816734	0.299555	0.00676048	0.542704
ENSG00000069345	DNAJA2	DnaJ heat shock protein family (Hsp40) member A2	10294	712	580	683	594	635	212	31.6526	26.3623	30.5661	34.2438	28.0982	45.6614	0.0914553	0.0468989	0.707472	0.853144	0.901959	0.0122899	0.599529	0.781276	0.000280772
ENSG00000069399	BCL3	BCL3 transcription coactivator	602	233	255	228	184	237	46	16.5752	18.5468	16.3278	16.974	16.7813	15.8542	-0.138578	0.0856216	-0.0361018	0.815624	0.83056	1	0.535452	0.672659	0.924774
ENSG00000069424	KCNAB2	potassium voltage-gated channel subfamily A regulatory beta subunit 2	8514	348	342	316	336	291	68	4.42006	4.44121	4.04041	5.53418	3.67889	4.18448	0.240697	-0.107476	0.0384414	0.508649	0.778639	0.996107	0.196321	0.600441	0.882728
ENSG00000069431	ABCC9	ATP binding cassette subfamily C member 9	10060	0	0	0	0	0	0	0	0	0	0	0	0
ENSG00000069482	GAL	galanin and GMAP prepropeptide	51083	660	682	739	450	699	143	111.744	118.056	125.954	98.8	117.796	117.3	-0.387828	0.106578	0.0606963	0.221948	0.730773	0.944603	0.0390523	0.539539	0.765591
ENSG00000069493	CLEC2D	C-type lectin domain family 2 member D	29121	4	6	7	4	9	2	0.126586	0.194134	0.223004	0.164154	0.283493	0.306647	-0.25821	0.751291	0.82066	1	0.583408	0.7738	1	0.374441	0.476806
ENSG00000069509	FUNDC1	FUN14 domain containing 1	139341	125	136	170	90	139	22	21.8875	24.3474	29.9658	20.436	24.2257	18.6635	-0.438196	0.0475299	-0.368093	0.308766	0.944186	0.674675	0.0735923	0.849452	0.341889
ENSG00000069535	MAOB	monoamine oxidase B	4129	228	232	217	187	154	39	17.3344	18.0338	16.6082	18.4366	11.6539	14.3655	-0.0336755	-0.454361	-0.192514	1	0.116655	0.808793	0.909642	0.0347237	0.532442
ENSG00000069667	RORA	RAR related orphan receptor A	6095	0	0	0	0	0	0	0	0	0	0	0	0
ENSG00000069696	DRD4	dopamine receptor D4	1815	14	13	19	10	32	2	2.05291	1.949	2.80469	1.90155	4.67054	1.42087	-0.375025	1.15199	-0.590595	0.806541	0.0219806	0.900254	0.523255	0.00332091	0.68094
ENSG00000069702	TGFBR3	transforming growth factor beta receptor 3	7049	61	67	65	54	32	12	1.56537	1.75787	1.67915	1.79699	0.817357	1.49194	-0.0153833	-0.90866	-0.0826021	1	0.0283078	1	1	0.00469528	0.899921
ENSG00000069764	PLA2G10	phospholipase A2 group X	8399	10	5	9	5	11	1	1.97223	1.00822	1.78686	1.27877	2.15936	0.955525	-0.431016	0.550192	-0.642676	0.94596	0.509054	0.97952	0.785077	0.303256	0.837052
ENSG00000069812	HES2	hes family bHLH transcription factor 2	54626	202	184	185	142	180	35	8.22275	7.65791	7.58102	7.49583	7.29312	6.90268	-0.183865	0.0172374	-0.101845	0.727166	0.999048	0.959436	0.415606	0.944713	0.798123
ENSG00000069849	ATP1B3	ATPase Na+/K+ transporting subunit beta 3	483	2297	2428	2414	1476	1726	390	193.188	208.782	204.384	160.979	144.489	158.916	-0.452822	-0.367948	-0.270447	0.103559	0.121724	0.453956	0.0106121	0.0368018	0.149394
ENSG00000069869	NEDD4	NEDD4 E3 ubiquitin protein ligase	4734	18	14	15	27	11	5	0.434315	0.345372	0.364346	0.844815	0.26418	0.584502	1.01793	-0.408502	0.688095	0.112721	0.767359	0.761947	0.0121983	0.585747	0.453497
ENSG00000069943	PIGB	phosphatidylinositol glycan anchor biosynthesis class B	9488	42	24	36	28	44	4	2.03528	1.18908	1.75617	1.75954	2.12228	0.939115	-0.0399177	0.469646	-0.740433	1	0.313944	0.725605	1	0.147304	0.397653
ENSG00000069956	MAPK6	mitogen-activated protein kinase 6	5597	284	169	231	354	133	63	9.80836	5.96749	8.0312	15.8543	4.57199	10.5415	0.877379	-0.674945	0.489675	0.000411231	0.0154226	0.281412	2.69209e-06	0.00210871	0.0563201
ENSG00000069966	GNB5	G protein subunit beta 5	10681	207	230	255	144	251	43	3.42512	3.89098	4.24752	3.08982	4.13385	3.44713	-0.443638	0.216719	-0.0850005	0.235241	0.472163	0.956949	0.0432297	0.270587	0.793813
ENSG00000069974	RAB27A	RAB27A, member RAS oncogene family	5873	39	50	43	27	37	2	1.53203	2.00816	1.70044	1.37541	1.4467	0.380641	-0.466192	-0.153642	-2.10319	0.52448	0.847644	0.143082	0.207715	0.696459	0.0152118
ENSG00000069998	HDHD5	haloacid dehalogenase like hydrolase domain containing 5	27440	1602	1592	1504	1249	1337	258	71.4347	72.5799	67.5126	72.2229	59.3408	55.7379	-0.0887598	-0.131389	-0.261538	0.865869	0.665256	0.497707	0.625896	0.463591	0.179993
ENSG00000070010	UFD1	ubiquitin recognition factor in ER associated degradation 1	7353	1068	1023	870	668	818	179	26.9511	26.3942	22.1012	21.8599	20.5464	21.8848	-0.324504	-0.173134	-0.121889	0.315024	0.547656	0.830679	0.0765779	0.340081	0.56616
ENSG00000070018	LRP6	LDL receptor related protein 6	4040	184	153	139	159	116	66	3.90574	3.3205	2.97023	4.37671	2.45086	6.78755	0.242883	-0.352374	1.07636	0.586167	0.283883	0.00371501	0.262315	0.126903	4.95612e-05
ENSG00000070019	GUCY2C	guanylate cyclase 2C	2984	0	0	0	0	0	0	0	0	0	0	0	0
ENSG00000070031	SCT	secretin	6343	0	0	0	0	0	0	0	0	0	0	0	0
ENSG00000070047	PHRF1	PHD and ring finger domains 1	57661	1414	1341	1090	1270	769	183	53.7982	52.1644	41.748	62.6597	29.1219	33.7329	0.225817	-0.638714	-0.466476	0.491296	0.00494131	0.1765	0.182374	0.000475976	0.0221067
ENSG00000070061	ELP1	elongator acetyltransferase complex subunit 1	8518	406	371	341	320	224	100	14.7558	13.7859	12.4762	15.0818	8.10326	17.6084	0.0192062	-0.635946	0.443512	1	0.0132455	0.268424	0.916661	0.00173068	0.0510454
ENSG00000070081	NUCB2	nucleobindin 2	4925	84	103	103	65	87	20	2.04859	2.56826	2.52873	2.05567	2.11188	2.36314	-0.336168	-0.0568828	0.065312	0.530229	0.960439	0.994015	0.213331	0.880563	0.872996
ENSG00000070087	PFN2	profilin 2	5217	1005	825	1122	876	513	319	59.6391	50.0548	67.0268	67.4117	30.3011	91.7149	0.071242	-0.841432	0.716318	0.889713	0.000199581	0.00617146	0.673376	7.87925e-06	0.000101576
ENSG00000070159	PTPN3	protein tyrosine phosphatase non-receptor type 3	5774	269	216	267	190	269	44	5.92368	4.86317	5.9189	5.42574	5.89613	4.69435	-0.160148	0.200417	-0.168017	0.757973	0.500596	0.843344	0.449647	0.296579	0.587522
ENSG00000070182	SPTB	spectrin beta, erythrocytic	6710	95	82	67	63	60	10	1.41319	1.24715	1.00333	1.2153	0.888392	0.720712	-0.128795	-0.33966	-0.680158	0.878156	0.403735	0.536206	0.647995	0.215541	0.205886
ENSG00000070190	DAPP1	dual adaptor of phosphotyrosine and 3-phosphoinositides 1	27071	1	1	0	0	1	1	0.0479523	0.0490271	0	0	0.0477293	0.232324
ENSG00000070193	FGF10	fibroblast growth factor 10	2255	0	0	0	0	0	0	0	0	0	0	0	0
ENSG00000070214	SLC44A1	solute carrier family 44 member 1	23446	286	227	292	211	351	54	5.17161	4.19674	5.31537	4.94776	6.31746	4.73084	-0.107192	0.485928	0.0290566	0.865284	0.0462847	1	0.625293	0.00922602	0.902464
ENSG00000070269	TMEM260	transmembrane protein 260	54916	44	58	48	41	69	13	1.19976	1.61695	1.31757	1.44974	1.87269	1.71739	-0.0497038	0.559103	0.394505	0.999592	0.140793	0.753793	0.907853	0.0450877	0.443615
ENSG00000070366	SMG6	SMG6 nonsense mediated mRNA decay factor	23293	657	680	599	609	528	105	13.6834	14.4799	12.5587	16.448	10.9456	10.595	0.153584	-0.193109	-0.279834	0.69855	0.503921	0.5509	0.380353	0.299154	0.218449
ENSG00000070367	EXOC5	exocyst complex component 5	10640	115	77	144	86	95	41	2.02948	1.38932	2.55822	1.96811	1.66873	3.50553	-0.141478	-0.138753	0.891239	0.862338	0.777513	0.069951	0.619682	0.598475	0.00423351
ENSG00000070371	CLTCL1	clathrin heavy chain like 1	8218	85	107	103	72	106	18	1.86118	2.39541	2.27037	2.04441	2.31021	1.90953	-0.213649	0.20294	-0.111238	0.747952	0.619454	0.969509	0.437024	0.411964	0.81712
ENSG00000070388	FGF22	fibroblast growth factor 22	27006	6	10	8	2	9	0	0.47538	0.810058	0.638073	0.205488	0.709754	0
ENSG00000070404	FSTL3	follistatin like 3	10272	633	666	649	567	923	117	45.936	49.414	47.4116	53.3579	66.6694	41.1358	0.0409444	0.602979	-0.133323	0.959896	0.00473117	0.824699	0.816729	0.000450475	0.557651
ENSG00000070413	DGCR2	DiGeorge syndrome critical region gene 2	9993	1437	1321	1243	1079	979	186	56.4291	53.0366	49.1369	54.9457	38.2652	35.387	-0.0667548	-0.347897	-0.50048	0.913198	0.1554	0.133492	0.72031	0.0525578	0.013483
ENSG00000070423	RNF126	ring finger protein 126	55658	1164	1203	1128	895	1229	208	74.2171	78.423	72.402	74.0014	77.9971	64.2538	-0.143436	0.173196	-0.146205	0.742023	0.513699	0.7738	0.430458	0.307053	0.474337
ENSG00000070444	MNT	MAX network transcriptional repressor	4335	356	353	287	315	249	54	9.0054	9.12965	7.30845	10.3331	6.26942	6.61806	0.162347	-0.317521	-0.279237	0.705388	0.26596	0.635995	0.389155	0.114892	0.298842
ENSG00000070476	ZXDC	ZXD family zinc finger C	79364	259	236	244	268	175	39	7.77816	7.24629	7.37662	10.4371	5.23107	5.67448	0.360014	-0.39532	-0.317748	0.286567	0.173558	0.625325	0.0639383	0.0612382	0.28856
ENSG00000070495	JMJD6	jumonji domain containing 6, arginine demethylase and lysine hydroxylase	23210	750	708	745	470	703	111	27.6555	26.6919	27.6546	22.4742	25.8019	19.8302	-0.405724	0.034193	-0.385282	0.194082	0.937843	0.33976	0.0306098	0.840597	0.082205
ENSG00000070501	POLB	DNA polymerase beta	5423	138	131	130	73	118	26	7.39745	7.17961	7.01515	5.07448	6.29594	6.75244	-0.626508	-0.0752411	-0.0141117	0.123652	0.899151	1	0.0142402	0.776501	1
ENSG00000070526	ST6GALNAC1	ST6 N-acetylgalactosaminide alpha-2,6-sialyltransferase 1	55808	1	0	0	0	0	0	0.0648118	0	0	0	0	0
ENSG00000070540	WIPI1	WD repeat domain, phosphoinositide interacting 1	55062	110	97	91	64	79	10	7.11464	6.41443	5.92505	5.36792	5.08584	3.1336	-0.394565	-0.231915	-0.968524	0.432323	0.58076	0.263387	0.143324	0.371228	0.049229
ENSG00000070601	FRMPD1	FERM and PDZ domain containing 1	22844	16	13	7	7	4	0	0.595572	0.494748	0.262303	0.337892	0.1482	0	-0.531708	-1.45989	-6.2799	0.765391	0.146454	0.28513	0.46086	0.0478885	0.0587021
ENSG00000070610	GBA2	glucosylceramidase beta 2	57704	701	637	541	563	680	123	32.1238	29.8453	24.9573	33.4567	31.0166	27.3085	0.0857126	0.21723	-0.006214	0.864952	0.402739	1	0.624938	0.21474	1
ENSG00000070614	NDST1	N-deacetylase and N-sulfotransferase 1	3340	881	820	713	853	462	118	20.39	19.4036	16.612	25.601	10.6429	13.2315	0.323153	-0.702169	-0.427931	0.281248	0.00262855	0.268938	0.0615128	0.000207194	0.0512147
ENSG00000070669	ASNS	asparagine synthetase (glutamine-hydrolyzing)	440	9	15	9	35	20	5	0.404597	0.689443	0.407299	2.0404	0.894924	1.08902	1.89486	0.951024	1.19096	0.000316364	0.124483	0.479967	1.94426e-06	0.038045	0.168489
ENSG00000070718	AP3M2	adaptor related protein complex 3 subunit mu 2	10947	222	177	195	192	200	51	7.7856	6.34657	6.88437	8.73185	6.98143	8.66549	0.195487	0.113572	0.385334	0.65908	0.76625	0.47171	0.337641	0.583642	0.159285
ENSG00000070729	CNGB1	cyclic nucleotide gated channel subunit beta 1	1258	1	0	0	0	1	0	0.0301096	0	0	0	0.0299695	0
ENSG00000070731	ST6GALNAC2	ST6 N-acetylgalactosaminide alpha-2,6-sialyltransferase 2	10610	25	21	20	22	7	1	1.83295	1.57419	1.47615	2.0917	0.51084	0.355218	0.23742	-1.53826	-2.08455	0.834471	0.0444106	0.367506	0.565108	0.00874816	0.0958411
ENSG00000070748	CHAT	choline O-acetyltransferase	1103	0	0	0	0	0	0	0	0	0	0	0	0
ENSG00000070756	PABPC1	poly(A) binding protein cytoplasmic 1	26986	16130	13709	12624	14066	9561	2717	856.096	743.91	674.49	968.109	505.088	698.653	0.231574	-0.466256	-0.0380178	0.451749	0.0385702	0.980196	0.155321	0.00717298	0.838274
ENSG00000070759	TESK2	testis associated actin remodelling kinase 2	10420	29	23	23	21	16	1	1.92315	1.55944	1.53544	1.80593	1.05611	0.321291	-0.0125406	-0.54243	-2.26753	1	0.442635	0.324046	1	0.246864	0.0755242
ENSG00000070761	CFAP20	cilia and flagella associated protein 20	29105	687	723	685	509	615	119	65.6861	70.6776	65.9322	63.1103	58.5285	55.1249	-0.219553	-0.087519	-0.213719	0.56669	0.812126	0.668679	0.243635	0.646737	0.335143
ENSG00000070770	CSNK2A2	casein kinase 2 alpha 2	1459	984	1028	972	830	1023	256	30.5429	32.6238	30.3718	33.4086	31.6057	38.498	-0.0243775	0.136367	0.38113	1	0.630749	0.248066	0.910346	0.424046	0.0439957
ENSG00000070778	PTPN21	protein tyrosine phosphatase non-receptor type 21	11099	46	54	37	47	44	8	1.32003	1.58433	1.06885	1.749	1.25677	1.11225	0.278256	0.042842	-0.172456	0.677509	1	0.959906	0.35763	0.953581	0.799409
ENSG00000070785	EIF2B3	eukaryotic translation initiation factor 2B subunit gamma	8891	132	129	135	116	127	41	8.51754	8.51053	8.76929	9.70653	8.15679	12.8176	0.0512589	0.0411145	0.652789	0.969508	0.937308	0.213618	0.837261	0.839878	0.0324637
ENSG00000070808	CAMK2A	calcium/calmodulin dependent protein kinase II alpha	815	1	0	0	0	0	0	0.0356208	0	0	0	0	0
ENSG00000070814	TCOF1	treacle ribosome biogenesis factor 1	6949	3150	3162	2593	2791	2979	499	60.61	62.2046	50.2258	69.6401	57.0532	46.5177	0.149079	0.102268	-0.232041	0.685902	0.724861	0.539404	0.366364	0.532437	0.208303
ENSG00000070831	CDC42	cell division cycle 42	998	2130	1825	2240	1400	1705	411	28.8005	25.2296	30.4901	24.5479	22.9467	26.9244	-0.321839	-0.178363	0.0124524	0.296624	0.519464	1	0.0690687	0.312893	0.93182
ENSG00000070882	OSBPL3	oxysterol binding protein like 3	26031	177	167	163	202	129	45	4.81615	4.6459	4.46483	7.12762	3.49375	5.93231	0.495309	-0.291968	0.431459	0.131689	0.390616	0.439379	0.0157464	0.20468	0.140091
ENSG00000070886	EPHA8	EPH receptor A8	2046	2	0	0	0	1	0	0.0810088	0	0	0	0.040316	0
ENSG00000070915	SLC12A3	solute carrier family 12 member 3	6559	0	3	1	0	3	1	0	0.10924	0.0358529	0	0.106348	0.172551
ENSG00000070950	RAD18	RAD18 E3 ubiquitin protein ligase	56852	102	93	115	108	120	25	3.21453	2.99659	3.64843	4.41375	3.76422	3.81717	0.301355	0.312496	0.292795	0.502441	0.352676	0.727602	0.191008	0.175584	0.400476
ENSG00000070961	ATP2B1	ATPase plasma membrane Ca2+ transporting 1	490	206	167	161	190	91	42	4.77624	3.95878	3.75781	5.71265	2.10008	4.71793	0.334132	-0.867719	0.259134	0.369445	0.00290047	0.693547	0.105281	0.000239284	0.361228
ENSG00000070985	TRPM5	transient receptor potential cation channel subfamily M member 5	29850	0	0	0	0	0	0	0	0	0	0	0	0
ENSG00000071051	NCK2	NCK adaptor protein 2	8440	301	294	216	216	147	25	22.269	22.2387	16.0872	20.7231	10.825	8.96105	-0.0848819	-0.780511	-1.09248	0.907017	0.00340958	0.0219962	0.707174	0.000294267	0.00067998
ENSG00000071054	MAP4K4	mitogen-activated protein kinase kinase kinase kinase 4	9448	921	919	811	779	664	199	16.9478	17.2901	15.0233	18.5891	12.1618	17.7416	0.055902	-0.315338	0.189555	0.925955	0.218945	0.664939	0.74389	0.0861445	0.329591
ENSG00000071073	MGAT4A	alpha-1,3-mannosyl-glycoprotein 4-beta-N-acetylglucosaminyltransferase A	11320	26	26	25	23	25	6	0.59388	0.607191	0.574851	0.681269	0.568382	0.663988	0.0794156	0.0589563	0.24238	0.994944	1	0.950266	0.897526	0.979403	0.778599
ENSG00000071082	RPL31	ribosomal protein L31	6160	5067	3504	5192	2217	5773	879	211.342	149.426	218.002	119.913	239.669	177.627	-0.807543	0.432269	-0.0397154	0.00075905	0.0421138	0.97952	6.08457e-06	0.008133	0.83714
ENSG00000071127	WDR1	WD repeat domain 1	9948	4541	4813	3981	3797	3097	805	127.696	138.379	112.696	138.463	86.6849	109.675	0.00957923	-0.425254	-0.125684	1	0.0648541	0.780491	0.94033	0.014903	0.48824
ENSG00000071189	SNX13	sorting nexin 13	23161	69	29	53	55	40	21	0.925019	0.39749	0.715267	0.956159	0.533749	1.36397	0.36912	-0.229697	1.08109	0.507934	0.697845	0.104414	0.195675	0.497908	0.00866981
ENSG00000071203	MS4A12	membrane spanning 4-domains A12	54860	0	0	0	0	0	0	0	0	0	0	0	0
ENSG00000071205	ARHGAP10	Rho GTPase activating protein 10	79658	144	134	176	123	170	28	2.94696	2.80377	3.62589	3.26424	3.46287	2.77622	-0.0615212	0.26424	-0.0941032	0.957023	0.395569	0.963879	0.807684	0.208565	0.805174
ENSG00000071242	RPS6KA2	ribosomal protein S6 kinase A2	6196	75	55	65	78	53	11	2.00068	1.50005	1.7455	2.69821	1.40724	1.42165	0.501953	-0.195131	-0.220065	0.245558	0.742235	0.908568	0.0471104	0.553381	0.696459
ENSG00000071243	ING3	inhibitor of growth family member 3	54556	30	44	50	46	40	11	1.26981	1.90414	2.13049	2.52489	1.68521	2.25577	0.389125	0.0475591	0.427199	0.515506	0.984107	0.735683	0.200383	0.921288	0.419537
ENSG00000071246	VASH1	vasohibin 1	22846	384	406	324	373	331	73	11.7013	12.649	9.93893	14.7394	10.0394	10.7773	0.24371	-0.0693907	-0.00688511	0.502398	0.872938	1	0.190693	0.736389	1
ENSG00000071282	LMCD1	LIM and cysteine rich domains 1	29995	43	38	34	17	29	3	1.04868	0.947513	0.834726	0.537638	0.70396	0.35447	-0.929867	-0.303522	-1.32538	0.17846	0.665981	0.431992	0.0265068	0.464273	0.135513
ENSG00000071462	BUD23	BUD23 rRNA methyltransferase and ribosome maturation factor	114049	2488	2708	2757	1893	2666	389	68.9339	76.7111	76.8971	68.0141	73.5222	52.2175	-0.250247	0.102878	-0.430532	0.449855	0.723975	0.174485	0.154099	0.531128	0.0215311
ENSG00000071537	SEL1L	SEL1L adaptor subunit of SYVN1 ubiquitin ligase	6400	234	179	229	215	112	46	5.39136	4.21659	5.31139	6.42372	2.56848	5.13481	0.246539	-0.834348	0.12449	0.534441	0.00277433	0.894533	0.216632	0.000224375	0.66692
ENSG00000071539	TRIP13	thyroid hormone receptor interactor 13	9319	481	474	491	375	487	101	31.8977	32.1381	32.7783	32.2487	32.1454	32.4504	-0.124715	0.111395	0.0852193	0.811427	0.726815	0.908568	0.529785	0.534779	0.697382
ENSG00000071553	ATP6AP1	ATPase H+ transporting accessory protein 1	537	2119	2140	1836	1566	1446	302	95.7491	98.8654	83.5155	91.7617	65.0351	66.1142	-0.137909	-0.393766	-0.409815	0.748109	0.0955085	0.213598	0.438163	0.0262282	0.0323324
ENSG00000071564	TCF3	transcription factor 3	6929	2548	2732	2299	2040	1724	334	92.0882	100.951	83.6438	95.6094	62.018	58.4838	-0.0718239	-0.455469	-0.579902	0.898681	0.0483305	0.0472742	0.69085	0.00992437	0.00226132
ENSG00000071575	TRIB2	tribbles pseudokinase 2	28951	231	190	174	158	134	34	11.0818	9.3192	8.40307	9.82928	6.39851	7.90245	-0.0876434	-0.4659	-0.201319	0.90914	0.117827	0.816143	0.712226	0.0351987	0.541915
ENSG00000071626	DAZAP1	DAZ associated protein 1	26528	1539	1592	1726	1223	1770	295	36.8151	38.9365	41.5641	37.9384	42.144	34.1895	-0.168419	0.224016	-0.117528	0.665935	0.360787	0.821666	0.345876	0.18132	0.550686
ENSG00000071655	MBD3	methyl-CpG binding domain protein 3	53615	1889	2067	2044	1627	2350	347	52.5693	58.8122	57.2627	58.7156	65.0944	46.7858	-0.0621199	0.327445	-0.188784	0.921439	0.1484	0.658317	0.734873	0.0488752	0.32199
ENSG00000071677	PRLH	prolactin releasing hormone	51052	0	0	0	0	0	0	0	0	0	0	0	0
ENSG00000071794	HLTF	helicase like transcription factor	6596	203	125	152	198	150	51	7.41708	4.66953	5.59076	9.38141	5.45511	9.02799	0.549666	0.0086344	0.695097	0.0817381	1	0.141265	0.00692863	0.961276	0.0147852
ENSG00000071859	FAM50A	family with sequence similarity 50 member A	9130	1246	1273	1221	1126	1829	242	107.463	112.253	106.01	125.935	157.011	101.121	0.0901349	0.64908	-0.0254496	0.849623	0.00142686	1	0.591898	9.35038e-05	0.912932
ENSG00000071889	FAM3A	FAM3 metabolism regulating signaling molecule A	60343	272	270	286	257	371	69	11.7433	11.9183	12.4302	14.3887	15.9431	14.433	0.134352	0.523002	0.339672	0.790622	0.028864	0.489091	0.499769	0.00481453	0.175347
ENSG00000071894	CPSF1	cleavage and polyadenylation specific factor 1	29894	3489	3361	2842	3383	2568	453	126.763	124.85	103.946	159.39	92.8674	79.7398	0.305052	-0.233443	-0.493097	0.288143	0.360787	0.0988808	0.064404	0.181303	0.00783575
ENSG00000071909	MYO3B	myosin IIIB	140469	0	0	0	0	0	0	0	0	0	0	0	0
ENSG00000071967	CYBRD1	cytochrome b reductase 1	79901	153	117	162	112	103	25	6.51111	5.09068	6.94015	6.18084	4.36291	5.15451	-0.123032	-0.384472	-0.183902	0.866252	0.261765	0.883797	0.626621	0.112164	0.649812
ENSG00000071991	CDH19	cadherin 19	28513	0	0	1	0	0	0	0	0	0.0322801	0	0	0
ENSG00000071994	PDCD2	programmed cell death 2	5134	1296	1114	1429	870	1352	304	44.0474	38.7103	48.892	38.3443	45.737	50.0579	-0.3181	0.176996	0.267421	0.317588	0.497975	0.451369	0.0775831	0.29456	0.147782
ENSG00000072041	SLC6A15	solute carrier family 6 member 15	55117	0	0	0	0	0	0	0	0	0	0	0	0
ENSG00000072042	RDH11	retinol dehydrogenase 11	51109	564	492	508	387	281	95	22.5786	20.1377	20.4725	20.0907	11.1969	18.4257	-0.190509	-0.792924	-0.114327	0.645757	0.001018	0.877909	0.320463	5.99785e-05	0.639908
ENSG00000072062	PRKACA	protein kinase cAMP-activated catalytic subunit alpha	5566	1907	1738	1460	1570	1125	211	68.1163	63.4712	52.4981	72.722	39.9971	36.5146	0.123443	-0.498202	-0.669388	0.764947	0.0313698	0.0245003	0.459659	0.00538222	0.000813403
ENSG00000072071	ADGRL1	adhesion G protein-coupled receptor L1	22859	1734	1642	1633	1225	1674	207	44.9694	43.5379	42.6328	41.1974	43.2114	26.0089	-0.208601	0.101033	-0.671086	0.564017	0.733398	0.0241123	0.241657	0.543116	0.00079408
ENSG00000072080	SPP2	secreted phosphoprotein 2	6694	0	0	0	0	1	0	0	0	0	0	0.173184	0
ENSG00000072110	ACTN1	actinin alpha 1	87	1898	1972	1354	1776	923	297	39.3141	41.7624	28.2333	47.7047	19.0296	29.8052	0.266446	-0.818543	-0.211081	0.381124	0.000182337	0.610539	0.111537	7.04964e-06	0.274694
ENSG00000072121	ZFYVE26	zinc finger FYVE-type containing 26	23503	197	172	164	198	139	38	2.76107	2.46472	2.31391	3.59868	1.93911	2.58035	0.395407	-0.255414	0.116663	0.264304	0.451617	0.901959	0.0542016	0.254227	0.683487
ENSG00000072133	RPS6KA6	ribosomal protein S6 kinase A6	27330	0	0	0	0	0	0	0	0	0	0	0	0
ENSG00000072134	EPN2	epsin 2	22905	343	282	325	331	368	67	8.86399	7.45094	8.45491	11.0925	9.46583	8.38869	0.303352	0.315366	0.101349	0.369445	0.22439	0.901959	0.105267	0.0895013	0.684329
ENSG00000072135	PTPN18	protein tyrosine phosphatase non-receptor type 18	26469	638	577	587	586	625	107	24.4983	22.6526	22.6905	29.1796	23.8875	19.906	0.20311	0.155216	-0.147568	0.578919	0.58901	0.805298	0.254388	0.380315	0.526914
ENSG00000072163	LIMS2	LIM zinc finger domain containing 2	55679	50	55	46	40	39	10	1.29669	1.45833	1.20093	1.34522	1.00672	1.25647	-0.0937105	-0.270594	0.00854406	0.951919	0.619356	1	0.798838	0.411787	1
ENSG00000072182	ASIC4	acid sensing ion channel subunit family member 4	55515	5	2	0	1	5	0	0.20962	0.0857273	0	0.0543661	0.208645	0
ENSG00000072195	SPEG	striated muscle enriched protein kinase	10290	358	360	375	401	536	70	4.61714	4.747	4.86869	6.70657	6.88067	4.37394	0.375352	0.653058	-0.0401575	0.227069	0.00304558	1	0.0406509	0.000255528	0.911416
ENSG00000072201	LNX1	ligand of numb-protein X 1	84708	13	11	13	3	9	1	0.508768	0.440145	0.512166	0.152252	0.350586	0.18961	-1.76424	-0.352914	-1.25789	0.225773	0.894577	0.737914	0.0402039	0.770639	0.424165
ENSG00000072210	ALDH3A2	aldehyde dehydrogenase 3 family member A2	224	648	586	685	577	829	172	9.30308	8.60153	9.89994	10.7422	11.8463	11.9637	0.0894102	0.47129	0.445702	0.85674	0.0356047	0.195687	0.608034	0.00643121	0.0273726
ENSG00000072274	TFRC	transferrin receptor	7037	2238	2006	2076	1953	1650	494	63.2007	57.9187	59.0173	71.5204	46.379	67.5885	0.129674	-0.254387	0.249086	0.745619	0.316501	0.468001	0.434768	0.149143	0.157648
ENSG00000072310	SREBF1	sterol regulatory element binding transcription factor 1	6720	3737	3553	3148	2574	2557	307	99.7837	96.997	84.6178	89.1274	67.9584	39.7154	-0.196164	-0.346576	-1.16126	0.585516	0.145758	5.10995e-07	0.261624	0.0473593	2.11635e-09
ENSG00000072315	TRPC5	transient receptor potential cation channel subfamily C member 5	7224	0	0	0	0	0	0	0	0	0	0	0	0
ENSG00000072364	AFF4	ALF transcription elongation factor 4	27125	165	109	116	159	79	46	3.21928	2.17434	2.27836	4.02288	1.53418	4.34827	0.532048	-0.616713	0.844933	0.113029	0.0568911	0.0721999	0.0122618	0.0123891	0.00451138
ENSG00000072401	UBE2D1	ubiquitin conjugating enzyme E2 D1	7321	18	20	28	13	4	6	1.13845	1.2933	1.78275	1.06623	0.251813	1.83856	-0.517889	-2.32896	0.462673	0.635967	0.00227665	0.833044	0.312099	0.000171852	0.571222
ENSG00000072415	PALS1	protein associated with LIN7 1, MAGUK p55 family member	64398	74	82	86	82	82	27	1.861	2.10841	2.17723	2.6742	2.0526	3.28975	0.260085	0.119429	0.759192	0.641395	0.819314	0.233147	0.316401	0.655679	0.038516
ENSG00000072422	RHOBTB1	Rho related BTB domain containing 1	9886	10	14	8	8	12	3	0.460559	0.659234	0.370907	0.477794	0.5501	0.669407	-0.175023	0.263943	0.503981	0.991012	0.824394	0.891249	0.889286	0.663425	0.661046
ENSG00000072501	SMC1A	structural maintenance of chromosomes 1A	8243	1730	1613	1291	1906	674	419	36.3196	34.6223	27.2842	51.89	14.0841	42.618	0.542636	-1.09778	0.459639	0.0259209	4.31865e-07	0.11341	0.00109432	4.96198e-09	0.0102197
ENSG00000072506	HSD17B10	hydroxysteroid 17-beta dehydrogenase 10	3028	2789	2822	2838	1805	3228	446	550.549	569.549	563.962	462.051	634.244	426.546	-0.404878	0.292871	-0.319232	0.157401	0.20153	0.34379	0.021515	0.0762638	0.0851804
ENSG00000072518	MARK2	microtubule affinity regulating kinase 2	2011	916	782	753	861	613	156	32.7612	28.5955	27.1113	39.9331	21.8223	27.0317	0.315715	-0.31517	-0.046167	0.294026	0.221195	0.986681	0.0675258	0.0875006	0.851192
ENSG00000072571	HMMR	hyaluronan mediated motility receptor	3161	148	80	135	153	38	34	8.28457	4.57852	7.60734	11.1062	2.11723	9.22086	0.580139	-1.56668	0.5127	0.0841062	3.70254e-06	0.405903	0.00735437	6.0596e-08	0.116429
ENSG00000072609	CHFR	checkpoint with forkhead and ring finger domains	55743	0	1	1	0	0	0	0	0.0131392	0.0129369	0	0	0
ENSG00000072657	TRHDE	thyrotropin releasing hormone degrading enzyme	29953	4	1	6	10	3	4	0.0717877	0.0183492	0.108401	0.232732	0.0535903	0.347803	1.65155	-0.184974	2.41743	0.130423	1	0.233029	0.0155514	1	0.0383039
ENSG00000072682	P4HA2	prolyl 4-hydroxylase subunit alpha 2	8974	439	452	354	315	261	70	11.3649	11.9637	9.2256	10.5749	6.72538	8.77977	-0.159927	-0.571926	-0.227281	0.733468	0.0257889	0.707945	0.422096	0.00410912	0.375773
ENSG00000072694	FCGR2B	Fc gamma receptor IIb	2213	0	0	0	0	0	0	0	0	0	0	0	0
ENSG00000072736	NFATC3	nuclear factor of activated T cells 3	4775	290	258	329	216	277	73	7.24839	6.5931	8.27808	7.00105	6.89126	8.83996	-0.198445	0.0194483	0.338767	0.660649	0.984896	0.481414	0.340916	0.92276	0.16997
ENSG00000072756	TRNT1	tRNA nucleotidyl transferase 1	51095	60	57	77	58	66	17	2.27612	2.21078	2.94053	2.85324	2.49209	3.12448	0.0804255	0.1259	0.41173	0.934489	0.837897	0.702592	0.760838	0.683191	0.37068
ENSG00000072778	ACADVL	acyl-CoA dehydrogenase very long chain	37	3449	3673	3576	2838	4332	513	157.496	171.484	164.385	168.056	196.897	113.495	-0.0932816	0.376003	-0.458574	0.853144	0.0847973	0.128669	0.598463	0.0220196	0.0126348
ENSG00000072786	STK10	serine/threonine kinase 10	6793	508	525	456	473	507	72	12.5419	13.2522	11.3333	15.1435	12.459	8.61226	0.167821	0.127118	-0.445213	0.66879	0.680978	0.314761	0.349632	0.480051	0.0711944
ENSG00000072803	FBXW11	F-box and WD repeat domain containing 11	23291	448	417	375	360	282	77	17.6807	16.8261	14.8985	18.4242	11.0776	14.723	0.0395213	-0.453463	-0.0829696	0.966252	0.0846086	0.944603	0.831639	0.0218954	0.764443
ENSG00000072818	ACAP1	ArfGAP with coiled-coil, ankyrin repeat and PH domains 1	9744	9	10	30	10	33	5	0.266969	0.303281	0.895838	0.384666	0.974333	0.718575	-0.46636	1.10488	0.62693	0.71484	0.0263785	0.737914	0.399946	0.00426073	0.42378
ENSG00000072832	CRMP1	collapsin response mediator protein 1	1400	0	0	0	0	1	0	0	0	0	0	0.0374427	0
ENSG00000072840	EVC	EvC ciliary complex subunit 1	2121	1	0	0	1	0	0	0.0308092	0	0	0.0399527	0	0
ENSG00000072849	DERL2	derlin 2	51009	232	244	251	140	251	34	7.99991	8.60228	8.71287	6.26024	8.61482	5.68015	-0.554502	0.146465	-0.493774	0.109218	0.659201	0.397622	0.0116149	0.457046	0.112301
ENSG00000072858	SIDT1	SID1 transmembrane family member 1	54847	2	1	0	1	1	0	0.0546156	0.0279199	0	0.0354122	0.0271808	0
ENSG00000072864	NDE1	nudE neurodevelopment protein 1	54820	484	497	362	426	205	77	19.39	20.3571	14.5993	22.1314	8.17453	14.9454	0.166445	-1.02917	-0.198827	0.675939	2.20067e-05	0.744251	0.356301	5.17459e-07	0.429841
ENSG00000072952	IRAG1	inositol 1,4,5-triphosphate receptor associated 1	10335	184	147	136	121	145	22	5.25956	4.29611	3.91346	4.48521	4.12548	3.04676	-0.122894	-0.00281212	-0.47933	0.85996	1	0.540818	0.614897	1	0.210727
ENSG00000072954	TMEM38A	transmembrane protein 38A	79041	256	226	225	205	201	32	18.8637	17.0264	16.6901	19.5887	14.7421	11.4241	0.0379773	-0.131215	-0.538517	0.975672	0.730328	0.353617	0.850791	0.538648	0.0895262
ENSG00000072958	AP1M1	adaptor related protein complex 1 subunit mu 1	8907	779	870	713	690	651	122	11.9309	13.6233	10.993	13.7041	9.92411	9.05272	0.0458088	-0.178951	-0.351289	0.945836	0.541953	0.392652	0.783964	0.334476	0.109561
ENSG00000073008	PVR	PVR cell adhesion molecule	5817	1141	1093	1012	1036	1150	192	41.1832	40.3349	36.771	48.4909	41.315	33.5753	0.175587	0.185338	-0.153684	0.628422	0.477223	0.76359	0.303456	0.275909	0.455145
ENSG00000073050	XRCC1	X-ray repair cross complementing 1	7515	781	820	631	617	524	103	49.6961	53.3472	40.4195	50.9123	33.1878	31.7536	-0.032564	-0.409051	-0.512536	0.984673	0.0993195	0.175266	0.875813	0.0277126	0.0217763
ENSG00000073060	SCARB1	scavenger receptor class B member 1	949	1971	2058	1811	1392	1862	312	56.0417	59.827	51.8363	51.3251	52.6963	42.9797	-0.24687	0.0319451	-0.301871	0.463378	0.936633	0.402245	0.163343	0.83859	0.114466
ENSG00000073067	CYP2W1	cytochrome P450 family 2 subfamily W member 1	54905	0	1	0	1	1	0	0	0.0806285	0	0.102265	0.0784942	0
ENSG00000073111	MCM2	minichromosome maintenance complex component 2	4171	6079	5874	4925	4886	2873	720	283.774	280.35	231.439	295.774	133.491	162.838	0.0351188	-0.871808	-0.624913	0.961763	4.05419e-05	0.0198803	0.820093	1.05079e-06	0.000581607
ENSG00000073146	MOV10L1	Mov10 like RNA helicase 1	54456	0	0	0	0	0	0	0	0	0	0	0	0
ENSG00000073150	PANX2	pannexin 2	56666	159	127	136	119	114	21	11.2781	9.21023	9.71112	10.9459	8.0486	7.21678	-0.001445	-0.204035	-0.400901	1	0.605532	0.657733	0.996979	0.398187	0.319288
ENSG00000073169	SELENOO	selenoprotein O	83642	316	288	338	187	364	39	29.4337	27.4269	31.6931	22.5874	33.747	17.5998	-0.509413	0.310262	-0.668204	0.126051	0.239716	0.171571	0.0148088	0.0983362	0.0207889
ENSG00000073282	TP63	tumor protein p63	8626	0	0	0	0	0	0	0	0	0	0	0	0
ENSG00000073331	ALPK1	alpha kinase 1	80216	79	87	62	66	81	11	1.41067	1.58835	1.1145	1.5283	1.43966	0.951648	0.0340268	0.188386	-0.447268	0.997051	0.669494	0.727602	0.902092	0.468102	0.400143
ENSG00000073350	LLGL2	LLGL scribble cell polarity complex component 2	3993	1891	1814	1709	1632	1874	331	52.625	51.6136	47.8776	58.8961	51.9093	44.6285	0.0930814	0.151699	-0.106109	0.837774	0.571961	0.843163	0.574454	0.362968	0.587012
ENSG00000073417	PDE8A	phosphodiesterase 8A	5151	67	40	71	59	64	18	1.84242	1.12461	1.96546	2.10394	1.75174	2.39812	0.231433	0.207985	0.620386	0.744424	0.676735	0.465425	0.433277	0.475291	0.155515
ENSG00000073464	CLCN4	chloride voltage-gated channel 4	1183	59	52	52	62	40	10	1.91279	1.72364	1.69711	2.6066	1.29078	1.57073	0.428247	-0.343087	-0.100305	0.39017	0.490634	1	0.116999	0.287583	0.953091
ENSG00000073536	NLE1	notchless homolog 1	54475	1073	1111	876	856	1017	161	43.1358	45.6645	35.4513	44.6249	40.6944	31.358	-0.015298	0.0924672	-0.323263	1	0.767274	0.410227	0.951199	0.585014	0.119785
ENSG00000073578	SDHA	succinate dehydrogenase complex flavoprotein subunit A	6389	427	441	396	304	542	94	10.7225	11.3223	10.0105	9.89942	13.5471	11.4362	-0.233562	0.459604	0.175491	0.560693	0.0496578	0.751245	0.238809	0.0102854	0.437752
ENSG00000073584	SMARCE1	SWI/SNF related, matrix associated, actin dependent regulator of chromatin, subfamily e, member 1	6605	95	41	79	84	66	23	1.13208	0.499535	0.947704	1.29808	0.782843	1.3279	0.470901	-0.0171204	0.704189	0.288783	1	0.315255	0.0646048	0.995769	0.071853
ENSG00000073598	FNDC8	fibronectin type III domain containing 8	54752	0	0	0	0	0	0	0	0	0	0	0	0
ENSG00000073605	GSDMB	gasdermin B	55876	108	109	119	69	140	22	4.02556	4.15389	4.46518	3.33516	5.19404	3.97291	-0.460864	0.417995	-0.00804406	0.321487	0.16626	1	0.0793989	0.0577246	1
ENSG00000073614	KDM5A	lysine demethylase 5A	5927	180	139	154	161	161	41	3.29356	2.60036	2.83664	3.82018	2.9322	3.63463	0.270204	0.129448	0.399227	0.513036	0.738667	0.506035	0.198977	0.549626	0.184329
ENSG00000073670	ADAM11	ADAM metallopeptidase domain 11	4185	134	123	102	136	118	16	6.12789	5.75093	4.69566	8.06512	5.3711	3.54495	0.423216	0.0778559	-0.560421	0.271022	0.880628	0.50885	0.0567028	0.747757	0.186379
ENSG00000073711	PPP2R3A	protein phosphatase 2 regulatory subunit B''alpha	5523	49	35	30	32	23	11	1.38535	1.01171	0.853837	1.17322	0.647242	1.50675	-0.0078803	-0.622595	0.552167	1	0.232889	0.615805	1	0.094287	0.279477
ENSG00000073712	FERMT2	FERM domain containing kindlin 2	10979	124	92	102	93	119	24	3.22492	2.44631	2.67047	3.13651	3.08049	3.02408	0.0514927	0.266063	0.199614	0.971467	0.442375	0.838339	0.841283	0.246603	0.576813
ENSG00000073734	ABCB11	ATP binding cassette subfamily B member 11	8647	0	1	0	0	0	0	0	0.0291684	0	0	0	0
ENSG00000073737	DHRS9	dehydrogenase/reductase 9	10170	0	0	0	0	0	0	0	0	0	0	0	0
ENSG00000073754	CD5L	CD5 molecule like	922	0	0	0	0	0	0	0	0	0	0	0	0
ENSG00000073756	PTGS2	prostaglandin-endoperoxide synthase 2	5743	3	2	5	0	1	2	0.125414	0.0854831	0.210419	0	0.0416101	0.405077
ENSG00000073792	IGF2BP2	insulin like growth factor 2 mRNA binding protein 2	10644	781	664	740	581	669	141	36.3039	31.5571	34.6277	35.0222	30.9531	31.7545	-0.0866251	-0.0240275	-0.0269471	0.882344	0.982709	1	0.654692	0.918508	0.919922
ENSG00000073803	MAP3K13	mitogen-activated protein kinase kinase kinase 13	9175	131	71	133	108	112	23	2.28763	1.26765	2.33806	2.4457	1.94674	1.94592	0.193109	0.104813	0.0644374	0.714971	0.807184	0.991417	0.401378	0.640463	0.863752
ENSG00000073849	ST6GAL1	ST6 beta-galactoside alpha-2,6-sialyltransferase 1	6480	258	242	226	219	127	40	6.217	5.96215	5.48226	6.84339	3.04607	4.66987	0.0944133	-0.831908	-0.255685	0.866252	0.00222722	0.725605	0.626571	0.000165591	0.397605
ENSG00000073861	TBX21	T-box transcription factor 21	30009	0	0	0	0	0	2	0	0	0	0	0	0.812469
ENSG00000073905	VDAC1P1	voltage dependent anion channel 1 pseudogene 1		65	65	60	55	27	23	16.8709	17.2491	15.6772	18.5121	6.97534	28.9226	0.0343642	-1.12946	0.877545	1	0.00721132	0.181785	0.936456	0.000780865	0.0236551
ENSG00000073910	FRY	FRY microtubule binding protein	10129	11	2	7	4	7	0	0.128427	0.0238738	0.0822722	0.0605606	0.0813464	0	-0.486085	0.166099	-5.44605	0.975672	1	0.53978	0.852358	1	0.209988
ENSG00000073921	PICALM	phosphatidylinositol binding clathrin assembly protein	8301	302	283	321	342	284	77	10.481	10.0417	11.2148	15.3917	9.81046	12.947	0.41711	0.00829818	0.368563	0.176225	1	0.425358	0.0258393	0.95774	0.130307
ENSG00000073969	NSF	N-ethylmaleimide sensitive factor, vesicle fusing ATPase	4905	644	540	545	506	463	118	28.3207	24.2794	24.1271	28.8559	20.2663	25.1411	0.0523067	-0.216614	0.0544844	0.93728	0.449283	0.958701	0.768419	0.252523	0.796582
ENSG00000074047	GLI2	GLI family zinc finger 2	2736	117	96	89	132	82	23	3.50794	2.94283	2.68625	5.13224	2.44712	3.34102	0.630091	-0.196684	0.212142	0.0689138	0.655622	0.841235	0.00515587	0.452102	0.580772
ENSG00000074054	CLASP1	cytoplasmic linker associated protein 1	23332	341	290	288	334	253	62	6.79103	5.90481	5.77383	8.62568	5.01507	5.98214	0.364347	-0.177007	0.0374881	0.258618	0.595443	0.996697	0.0520865	0.38658	0.883645
ENSG00000074071	MRPS34	mitochondrial ribosomal protein S34	65993	3530	4219	3993	2544	4475	569	708.256	865.469	806.501	661.909	893.684	553.11	-0.387276	0.286631	-0.445337	0.179541	0.210513	0.141265	0.0267953	0.0812803	0.0148062
ENSG00000074181	NOTCH3	notch receptor 3	4854	370	319	245	340	226	31	8.65618	7.63031	5.77007	10.315	5.2627	3.51375	0.367485	-0.362281	-0.984332	0.25073	0.200116	0.0317681	0.0491745	0.0755681	0.00119794
ENSG00000074201	CLNS1A	chloride nucleotide-sensitive channel 1A	1207	820	819	894	531	1013	165	39.3981	40.2321	43.2404	33.0843	48.4447	38.4087	-0.432146	0.358721	-0.015935	0.151078	0.120781	1	0.0199685	0.036428	0.962532
ENSG00000074211	PPP2R2C	protein phosphatase 2 regulatory subunit Bgamma	5522	396	405	423	370	368	79	9.306	9.73082	10.0069	11.2755	8.60778	8.99454	0.0957695	-0.0528625	-0.0292593	0.85674	0.915551	1	0.60771	0.804271	0.935686
ENSG00000074219	TEAD2	TEA domain transcription factor 2	8463	489	505	474	375	392	95	36.1172	38.135	35.2431	35.9172	28.8182	33.9949	-0.146828	-0.223702	-0.0252207	0.759596	0.436602	1	0.45317	0.241779	0.947352
ENSG00000074266	EED	embryonic ectoderm development	8726	184	158	208	103	119	29	5.94955	5.22336	6.77049	4.31886	3.82991	4.54306	-0.592941	-0.525563	-0.319145	0.107762	0.084211	0.67336	0.0113161	0.021725	0.339964
ENSG00000074276	CDHR2	cadherin related family member 2	54825	2	2	0	0	2	1	0.0823115	0.0841564	0	0	0.0819287	0.199395
ENSG00000074317	SNCB	synuclein beta	6620	0	1	4	1	1	0	0	0.112069	0.441376	0.142143	0.109102	0
ENSG00000074319	TSG101	tumor susceptibility 101	7251	368	413	383	284	436	91	22.7648	26.1212	23.8509	22.7824	26.8459	27.2735	-0.214148	0.263275	0.246263	0.607823	0.318997	0.624652	0.282724	0.150847	0.287916
ENSG00000074356	NCBP3	nuclear cap binding subunit 3	55421	475	412	357	353	388	96	7.10244	6.29851	5.37369	6.84471	5.77459	6.95456	0.00782056	0.00335174	0.231711	1	1	0.651076	0.969035	0.979483	0.312708
ENSG00000074370	ATP2A3	ATPase sarcoplasmic/endoplasmic reticulum Ca2+ transporting 3	489	415	408	358	309	310	44	13.2514	13.3199	11.5077	12.7949	9.8526	6.80692	-0.111238	-0.247386	-0.820338	0.844291	0.3941	0.0519013	0.584926	0.207579	0.00256924
ENSG00000074410	CA12	carbonic anhydrase 12	771	41	50	37	39	37	4	1.28953	1.60785	1.17149	1.59066	1.15831	0.609526	0.107244	-0.108912	-1.0695	0.942429	0.917491	0.479967	0.776544	0.80803	0.16757
ENSG00000074416	MGLL	monoglyceride lipase	11343	120	115	126	117	93	30	2.22906	2.18406	2.35614	2.81833	1.71949	2.69989	0.197085	-0.274462	0.335952	0.705388	0.472445	0.656374	0.389165	0.270843	0.31673
ENSG00000074527	NTN4	netrin 4	59277	19	33	16	24	2	1	1.00382	1.78256	0.850968	1.6443	0.105174	0.255969	0.317438	-3.33158	-2.12941	0.749812	0.000145411	0.421093	0.440721	5.26471e-06	0.127721
ENSG00000074582	BCS1L	BCS1 homolog, ubiquinol-cytochrome c reductase complex chaperone	617	737	727	675	656	749	148	48.0066	48.4167	44.2617	55.412	48.5614	46.7067	0.117559	0.167962	0.0719962	0.790546	0.543983	0.919427	0.499359	0.336746	0.713922
ENSG00000074590	NUAK1	NUAK family kinase 1	9891	227	171	137	189	127	29	7.12941	5.49099	4.3315	7.6976	3.97015	4.41276	0.325439	-0.388446	-0.275811	0.38309	0.223408	0.755206	0.112905	0.0889154	0.445527
ENSG00000074603	DPP8	dipeptidyl peptidase 8	54878	121	88	123	106	98	27	2.60819	1.93938	2.669	2.96296	2.10259	2.81969	0.177402	-0.0763811	0.306706	0.749835	0.904318	0.701229	0.440784	0.785917	0.368742
ENSG00000074621	SLC24A1	solute carrier family 24 member 1	9187	173	137	106	113	104	26	4.19171	3.39385	2.58548	3.5505	2.50815	3.05212	-0.0542258	-0.314553	-0.0714028	0.978353	0.383143	0.994675	0.857827	0.198053	0.87734
ENSG00000074657	ZNF532	zinc finger protein 532	55205	98	85	86	110	79	31	1.80486	1.60053	1.59443	2.6271	1.44817	2.76607	0.533179	-0.0844887	0.808114	0.174869	0.903063	0.167201	0.0255514	0.782776	0.0198441
ENSG00000074660	SCARF1	scavenger receptor class F member 1	8578	18	7	12	9	15	3	0.799076	0.317717	0.536274	0.518112	0.6628	0.645239	-0.212391	0.377875	0.299338	0.966252	0.646903	1	0.831868	0.443195	0.893415
ENSG00000074695	LMAN1	lectin, mannose binding 1	3998	312	230	317	293	161	53	11.3133	8.52683	11.5713	13.7774	5.81078	9.31093	0.273343	-0.730819	-0.0907975	0.442732	0.00596761	0.951607	0.150118	0.000614297	0.780292
ENSG00000074696	HACD3	3-hydroxyacyl-CoA dehydratase 3	51495	692	601	686	621	568	114	21.4702	19.0648	21.4262	24.9855	17.541	17.1364	0.151768	-0.117741	-0.191183	0.705388	0.723975	0.72294	0.388982	0.531157	0.394357
ENSG00000074706	IPCEF1	interaction protein for cytohesin exchange factors 1	26034	0	0	0	0	0	0	0	0	0	0	0	0
ENSG00000074755	ZZEF1	zinc finger ZZ-type and EF-hand domain containing 1	23140	320	323	296	390	259	58	4.43305	4.5749	4.12795	7.00621	3.57131	3.89282	0.55469	-0.176423	-0.0918893	0.0447787	0.60051	0.946005	0.00260835	0.392343	0.77015
ENSG00000074771	NOX3	NADPH oxidase 3	50508	0	0	0	0	0	0	0	0	0	0	0	0
ENSG00000074800	ENO1	enolase 1	2023	64923	63949	52440	46743	42173	9714	2739.57	2758.96	2227.6	2557.8	1771.31	1985.94	-0.132381	-0.421669	-0.296462	0.751025	0.0636369	0.34379	0.442588	0.0145043	0.0851696
ENSG00000074803	SLC12A1	solute carrier family 12 member 1	6557	0	0	0	0	0	0	0	0	0	0	0	0
ENSG00000074842	MYDGF	myeloid derived growth factor	56005	1253	1379	1621	841	1904	232	164.354	184.936	214.044	143.051	248.584	147.436	-0.518375	0.519526	-0.273849	0.0613331	0.0137454	0.479857	0.00416262	0.00180833	0.16651
ENSG00000074855	ANO8	anoctamin 8	57719	168	163	115	196	95	31	7.38801	7.32879	5.09104	11.1774	4.15831	6.60486	0.637205	-0.547488	0.0795917	0.0376892	0.0826917	0.973245	0.00200384	0.0212115	0.82311
ENSG00000074935	TUBE1	tubulin epsilon 1	51175	37	39	38	66	53	13	1.14911	1.23837	1.18805	2.65809	1.63837	1.95608	1.03166	0.575261	0.790254	0.0119044	0.175913	0.3904	0.000313846	0.0624922	0.108618
ENSG00000074964	ARHGEF10L	Rho guanine nucleotide exchange factor 10 like	55160	208	223	183	168	171	26	5.75572	6.30911	5.09774	6.02853	4.70986	3.48573	-0.0475722	-0.16282	-0.636339	0.972451	0.66501	0.2831	0.843246	0.462798	0.0572462
ENSG00000074966	TXK	TXK tyrosine kinase	7294	14	10	8	8	25	1	0.88904	0.649262	0.511415	0.658793	1.58019	0.307665	-0.173855	1.31663	-1.05072	0.991012	0.0177261	0.901959	0.889286	0.00250676	0.687164
ENSG00000075035	WSCD2	WSC domain containing 2	9671	0	0	0	0	0	0	0	0	0	0	0	0
ENSG00000075043	KCNQ2	potassium voltage-gated channel subfamily Q member 2	3785	699	756	564	469	519	116	12.0431	13.3171	9.78206	10.4785	8.90029	9.68285	-0.283874	-0.278588	-0.196817	0.407878	0.29769	0.70854	0.128738	0.13574	0.376385
ENSG00000075073	TACR2	tachykinin receptor 2	6865	2	3	1	1	1	1	0.150651	0.231041	0.0758284	0.0976805	0.0749751	0.364944
ENSG00000075089	ACTR6	actin related protein 6	64431	42	34	53	50	41	9	2.4244	2.0066	3.07979	3.74275	2.35567	2.51699	0.454715	0.028647	0.0841962	0.425619	1	1	0.139712	0.981696	0.905277
ENSG00000075131	TIPIN	TIMELESS interacting protein	54962	128	85	159	88	150	31	10.2858	6.98354	12.8623	9.17019	11.9977	12.0691	-0.254894	0.373005	0.341725	0.633951	0.224868	0.644365	0.309565	0.0898207	0.305568
ENSG00000075142	SRI	sorcin	6717	310	295	318	237	224	72	16.1037	15.6679	16.6296	15.9653	11.5821	18.1209	-0.138616	-0.360755	0.244921	0.801225	0.204029	0.656374	0.514119	0.0776453	0.317995
ENSG00000075151	EIF4G3	eukaryotic translation initiation factor 4 gamma 3	8672	302	271	233	239	245	58	6.9269	6.35518	5.37995	7.10879	5.59337	6.44531	0.0706338	-0.034404	0.13024	0.914262	0.973616	0.865795	0.7217	0.903483	0.617717
ENSG00000075188	NUP37	nucleoporin 37	79023	233	238	218	161	171	36	14.7028	15.355	13.8482	13.1746	10.7403	11.0061	-0.274837	-0.328727	-0.333214	0.523628	0.278396	0.617693	0.20678	0.123409	0.280953
ENSG00000075213	SEMA3A	semaphorin 3A	10371	8	4	7	2	3	1	0.190173	0.0972175	0.167512	0.0616529	0.070983	0.115171
ENSG00000075218	GTSE1	G2 and S-phase expressed 1	51512	693	649	558	684	415	113	37.0849	35.5087	30.0599	47.4663	22.1048	29.2972	0.349934	-0.511622	-0.145106	0.241367	0.0381511	0.804563	0.045339	0.00706176	0.525949
ENSG00000075223	SEMA3C	semaphorin 3C	10512	16	16	11	16	2	4	0.577314	0.590254	0.399554	0.748649	0.0718286	0.699256	0.393917	-2.67332	0.495006	0.744326	0.0103171	0.841842	0.432981	0.00125501	0.584439
ENSG00000075234	TTC38	tetratricopeptide repeat domain 38	55020	500	483	454	447	372	82	30.7575	30.3777	28.1143	35.6578	22.7772	24.4388	0.138305	-0.267412	-0.205635	0.758032	0.333698	0.726907	0.450566	0.162034	0.399143
ENSG00000075239	ACAT1	acetyl-CoA acetyltransferase 1	38	360	420	406	276	470	89	13.5008	16.104	15.3276	13.4225	17.5441	16.1708	-0.283053	0.34388	0.186515	0.448292	0.165867	0.735255	0.153174	0.0575159	0.414263
ENSG00000075240	GRAMD4	GRAM domain containing 4	23151	118	103	89	117	106	18	5.29931	4.72935	4.02363	6.81379	4.73826	3.91646	0.418129	0.135124	-0.179034	0.29274	0.765014	0.899755	0.0666438	0.582065	0.67683
ENSG00000075275	CELSR1	cadherin EGF LAG seven-pass G-type receptor 1	9620	296	291	264	390	218	51	5.08745	5.11362	4.56775	8.69239	3.72941	4.24681	0.697015	-0.282597	-0.135028	0.00795605	0.352133	0.881479	0.000161566	0.175078	0.645417
ENSG00000075290	WNT8B	Wnt family member 8B	7479	0	0	0	0	0	0	0	0	0	0	0	0
ENSG00000075292	ZNF638	zinc finger protein 638	27332	469	311	316	394	288	108	8.2754	5.61052	5.61298	9.01526	5.05806	9.2326	0.352454	-0.240329	0.587725	0.266772	0.418924	0.103796	0.0551655	0.227633	0.00855606
ENSG00000075303	SLC25A40	solute carrier family 25 member 40	55972	32	29	43	39	15	13	1.38537	1.28363	1.87402	2.18951	0.646373	2.72674	0.406465	-1.10548	0.92229	0.537828	0.0473386	0.314618	0.2197	0.00956204	0.0711411
ENSG00000075336	TIMM21	translocase of inner mitochondrial membrane 21	29090	275	227	236	190	194	51	11.6467	9.82928	10.0617	10.4349	8.17799	10.4646	-0.132701	-0.243439	0.0722818	0.81718	0.441256	0.960368	0.538206	0.245535	0.800307
ENSG00000075340	ADD2	adducin 2	119	0	0	0	0	1	0	0	0	0	0	0.0172869	0
ENSG00000075388	FGF4	fibroblast growth factor 4	2249	0	0	0	0	0	0	0	0	0	0	0	0
ENSG00000075391	RASAL2	RAS protein activator like 2	9462	88	61	79	81	42	28	1.20724	0.85559	1.09101	1.44099	0.573501	1.86102	0.331531	-0.754692	0.900695	0.507671	0.0473528	0.129936	0.195399	0.00957495	0.0129328
ENSG00000075399	VPS9D1	VPS9 domain containing 1	9605	90	74	59	71	67	10	5.93087	4.98579	3.91397	6.06736	4.39467	3.19271	0.173425	-0.0507178	-0.550166	0.80092	0.955427	0.632705	0.51383	0.872457	0.296095
ENSG00000075407	ZNF37A	zinc finger protein 37A	7587	114	61	107	124	100	25	1.90231	1.04072	1.79743	2.68327	1.66094	2.02116	0.64051	0.189787	0.432795	0.0671643	0.635049	0.582549	0.00494872	0.428839	0.249169
ENSG00000075413	MARK3	microtubule affinity regulating kinase 3	4140	365	347	345	300	450	64	9.03575	8.78269	8.59767	9.63071	11.0882	7.67601	0.00614187	0.450108	-0.120088	1	0.0597011	0.894482	0.978533	0.0132799	0.665275
ENSG00000075415	SLC25A3	solute carrier family 25 member 3	5250	10156	10568	10246	7459	9611	2049	251.275	267.329	255.195	239.317	236.685	245.614	-0.232307	-0.00746454	0.00615854	0.485259	1	1	0.178058	0.980326	0.956107
ENSG00000075420	FNDC3B	fibronectin type III domain containing 3B	64778	117	102	133	147	81	22	1.93274	1.72272	2.21172	3.14898	1.33183	1.76074	0.562914	-0.436699	-0.0741783	0.100559	0.204293	1	0.0100338	0.0778039	0.918728
ENSG00000075426	FOSL2	FOS like 2, AP-1 transcription factor subunit	2355	487	474	380	469	292	71	14.9664	14.8934	11.7561	18.6907	8.93194	10.5713	0.307815	-0.516406	-0.313148	0.337763	0.0449207	0.53978	0.0883462	0.00888211	0.209928
ENSG00000075429	CACNG5	calcium voltage-gated channel auxiliary subunit gamma 5	27091	0	0	0	0	0	0	0	0	0	0	0	0
ENSG00000075461	CACNG4	calcium voltage-gated channel auxiliary subunit gamma 4	27092	0	0	0	0	0	0	0	0	0	0	0	0
ENSG00000075539	FRYL	FRY like transcription coactivator	285527	206	161	161	157	146	43	2.4966	1.99496	1.96426	2.46745	1.76121	2.52485	0.0756823	-0.169788	0.309664	0.920358	0.669494	0.614902	0.733766	0.468134	0.278041
ENSG00000075568	TMEM131	transmembrane protein 131	23505	507	405	345	556	241	84	8.5563	6.9881	5.86121	12.168	4.04828	6.86817	0.649488	-0.696987	0.0255491	0.010595	0.00528921	1	0.000251958	0.000524328	0.90009
ENSG00000075618	FSCN1	fascin actin-bundling protein 1	6624	7528	7432	6743	6426	4585	970	447.937	452.137	403.907	495.843	271.552	279.636	0.0668737	-0.560971	-0.558444	0.891587	0.0109084	0.0417014	0.675807	0.00134354	0.00183854
ENSG00000075624	ACTB	actin beta	60	67305	60816	64052	57248	43996	12110	4340.43	4009.87	4158.23	4787.53	2824.06	3783.68	0.0765927	-0.444118	-0.0619023	0.86873	0.0490351	0.927044	0.631054	0.0101051	0.726835
ENSG00000075643	MOCOS	molybdenum cofactor sulfurase	55034	157	155	140	169	144	38	5.48245	5.53392	4.92145	7.65292	5.0051	6.42898	0.403368	0.0318319	0.352926	0.271113	0.971821	0.590496	0.0568342	0.9008	0.255882
ENSG00000075651	PLD1	phospholipase D1	5337	43	37	30	32	17	12	0.735952	0.647455	0.516883	0.710227	0.289605	0.995053	0.0424835	-1.00571	0.727689	1	0.0598286	0.50885	0.947731	0.0133325	0.186161
ENSG00000075673	ATP12A	ATPase H+/K+ transporting non-gastric alpha2 subunit	479	7	7	1	4	10	0	0.34685	0.354624	0.0498808	0.257021	0.493195	0	-0.0812482	1.07847	-5.04303	1	0.324411	0.727602	1	0.154903	0.401855
ENSG00000075702	WDR62	WD repeat domain 62	284403	532	589	474	500	458	87	11.9313	13.5057	10.7015	14.5416	10.2239	9.45321	0.147871	-0.119504	-0.272317	0.725192	0.729828	0.582885	0.412738	0.53777	0.249897
ENSG00000075711	DLG1	discs large MAGUK scaffold protein 1	1739	122	79	122	147	98	38	1.6223	1.07405	1.63313	2.53486	1.2971	2.44816	0.689081	-0.0360351	0.839604	0.0343421	0.98464	0.102952	0.00167652	0.922024	0.00836955
ENSG00000075785	RAB7A	RAB7A, member RAS oncogene family	7879	2553	2367	2204	2017	1988	405	206.816	196.046	179.736	211.887	160.297	158.954	0.00334126	-0.158402	-0.21033	1	0.578184	0.59655	0.970565	0.369015	0.26237
ENSG00000075790	BCAP29	B cell receptor associated protein 29	55973	107	58	93	64	125	16	2.80067	1.55214	2.45048	2.17232	3.25659	2.029	-0.184264	0.639599	-0.0818762	0.81747	0.0298279	1	0.540174	0.00503053	0.919428
ENSG00000075826	SEC31B	SEC31 homolog B, COPII coat complex component	25956	43	44	33	32	58	7	1.19288	1.24798	0.921582	1.15119	1.60152	0.940832	-0.0834578	0.631761	-0.173132	0.978876	0.10285	1	0.859232	0.0290069	0.900404
ENSG00000075856	SART3	spliceosome associated factor 3, U4/U6 recycling protein	9733	1296	1229	1084	1114	644	263	37.3512	36.2141	31.4499	41.6342	18.474	36.7231	0.127776	-0.803573	0.147687	0.758032	0.000337797	0.745475	0.450526	1.50959e-05	0.43073
ENSG00000075884	ARHGAP15	Rho GTPase activating protein 15	55843	0	0	0	0	0	0	0	0	0	0	0	0
ENSG00000075886	TUBA3D	tubulin alpha 3d	113457	0	0	0	0	0	0	0	0	0	0	0	0
ENSG00000075891	PAX2	paired box 2	5076	119	108	111	92	78	17	4.19542	3.89295	3.93951	4.20613	2.73715	2.90377	-0.0537482	-0.432261	-0.386763	0.979733	0.219643	0.700094	0.861668	0.0866099	0.366921
ENSG00000075914	EXOSC7	exosome component 7	23016	556	549	493	360	562	104	27.6307	27.8943	24.6634	23.1998	27.7989	25.04	-0.327226	0.17436	-0.016193	0.336954	0.533873	1	0.0877435	0.325887	0.975284
ENSG00000075945	KIFAP3	kinesin associated protein 3	22920	62	42	69	37	63	15	2.74131	1.89864	3.07119	2.12146	2.77257	3.21323	-0.399814	0.225654	0.398172	0.528946	0.639472	0.735255	0.212133	0.433277	0.415064
ENSG00000075975	MKRN2	makorin ring finger protein 2	23609	358	408	345	337	196	69	28.395	33.0861	27.5466	34.6621	15.4736	26.515	0.0999264	-0.822414	-0.0855518	0.85225	0.00115887	0.944603	0.596783	7.03685e-05	0.763772
ENSG00000076003	MCM6	minichromosome maintenance complex component 6	4175	1585	1499	1380	1072	1021	276	84.3676	81.5783	73.9462	73.9958	54.0938	71.177	-0.234509	-0.445668	-0.0895554	0.501538	0.0587293	0.88921	0.189894	0.0129738	0.656961
ENSG00000076043	REXO2	RNA exonuclease 2	25996	365	357	440	247	476	77	21.7185	21.7186	26.3561	19.059	28.1916	22.1979	-0.412068	0.393252	0.00871944	0.221432	0.105013	1	0.0387899	0.0299186	0.961794
ENSG00000076053	RBM7	RNA binding motif protein 7	10179	57	48	60	57	39	12	1.59109	1.3699	1.68602	2.06329	1.08358	1.62288	0.289465	-0.397205	0.144298	0.644843	0.405965	0.973245	0.319609	0.217107	0.822583
ENSG00000076067	RBMS2	RNA binding motif single stranded interacting protein 2	5939	518	437	440	477	413	113	12.7903	11.0321	10.9369	15.2733	10.1502	13.518	0.276625	-0.0719906	0.301468	0.402319	0.859163	0.481782	0.124651	0.714764	0.170474
ENSG00000076108	BAZ2A	bromodomain adjacent to zinc finger domain 2A	11176	1689	1576	1312	1834	1056	289	34.0493	32.4834	26.6258	47.9451	21.1894	28.2267	0.504751	-0.432413	-0.0585275	0.0430614	0.0670799	0.949751	0.00244216	0.0157713	0.777475
ENSG00000076201	PTPN23	protein tyrosine phosphatase non-receptor type 23	25930	1587	1327	991	1606	829	221	58.4603	49.9783	36.7492	76.7177	30.3958	39.4421	0.544818	-0.549958	-0.213931	0.0262185	0.0175741	0.622431	0.00111389	0.00247117	0.285597
ENSG00000076242	MLH1	mutL homolog 1	4292	38	44	29	30	48	8	2.36802	2.80337	1.81924	2.42431	2.97727	2.41532	-0.0646517	0.470951	0.13023	1	0.300091	1	0.918929	0.137432	0.897526
ENSG00000076248	UNG	uracil DNA glycosylase	7374	2042	2125	1904	1735	1162	329	175.086	186.287	164.344	192.913	99.1694	136.671	0.0149041	-0.704222	-0.281316	1	0.00141074	0.438147	0.917319	9.21643e-05	0.139551
ENSG00000076258	FMO4	flavin containing dimethylaniline monoxygenase 4	2329	18	17	10	18	10	5	1.55854	1.50495	0.871639	2.02109	0.861831	2.09749	0.497975	-0.482374	0.750068	0.634692	0.717845	0.727602	0.310266	0.523255	0.402533
ENSG00000076321	KLHL20	kelch like family member 20	27252	49	52	37	65	28	15	2.54122	2.75725	1.9317	4.37145	1.44537	3.76896	0.735206	-0.616912	0.721956	0.0860743	0.221934	0.421062	0.00764147	0.0879893	0.127134
ENSG00000076344	RGS11	regulator of G protein signaling 11	8786	0	0	0	0	0	0	0	0	0	0	0	0
ENSG00000076351	SLC46A1	solute carrier family 46 member 1	113235	637	556	501	593	425	80	17.6269	15.7303	13.9561	21.2793	11.7058	10.7253	0.310497	-0.310789	-0.476711	0.322196	0.244269	0.252287	0.0797828	0.100847	0.0454038
ENSG00000076356	PLXNA2	plexin A2	5362	12	6	14	13	14	1	0.19077	0.097523	0.224051	0.268002	0.22153	0.0770217	0.518912	0.485367	-1.05084	0.654234	0.539184	0.901959	0.33165	0.33165	0.687164
ENSG00000076382	SPAG5	sperm associated antigen 5	10615	1691	1617	1392	1363	1127	241	71.3282	69.7356	59.1082	74.5555	47.317	49.2514	0.0377236	-0.377395	-0.359382	0.959374	0.116157	0.305171	0.813902	0.0345148	0.0674762
ENSG00000076513	ANKRD13A	ankyrin repeat domain 13A	88455	160	112	141	117	162	32	4.79131	3.42909	4.25054	4.54346	4.82864	4.64268	0.00607048	0.334427	0.237993	1	0.270756	0.7738	0.997188	0.11829	0.475033
ENSG00000076554	TPD52	tumor protein D52	7163	272	185	391	215	221	84	7.30358	5.07885	10.569	7.48637	5.90656	10.9277	-0.155661	-0.256759	0.590651	0.771312	0.408004	0.139547	0.467785	0.218556	0.0143276
ENSG00000076555	ACACB	acetyl-CoA carboxylase beta	32	92	99	86	84	120	21	1.39602	1.53591	1.31369	1.65291	1.81243	1.54386	0.100765	0.474061	0.203113	0.901492	0.125565	0.850564	0.695058	0.0384916	0.59727
ENSG00000076604	TRAF4	TNF receptor associated factor 4	9618	1881	1968	1842	1805	1949	324	90.5336	96.8439	89.2485	112.658	93.3702	75.5527	0.164937	0.134815	-0.210436	0.648108	0.6252	0.608964	0.323294	0.417683	0.271898
ENSG00000076641	PAG1	phosphoprotein membrane anchor with glycosphingolipid microdomains 1	55824	9	3	5	9	7	2	0.179707	0.0612449	0.100504	0.23304	0.139122	0.19348	0.891437	0.395446	0.822025	0.507671	0.90459	0.7738	0.195304	0.787785	0.476806
ENSG00000076650	GPATCH1	G-patch domain containing 1	55094	104	61	68	83	56	22	5.12206	3.07162	3.3714	5.30097	2.74521	5.24951	0.337376	-0.369971	0.523918	0.496241	0.38171	0.479857	0.185502	0.197128	0.166195
ENSG00000076662	ICAM3	intercellular adhesion molecule 3	3385	151	202	219	169	215	47	11.9208	16.3045	17.4046	17.3014	16.8944	17.9767	0.0599104	0.266243	0.315959	0.94596	0.367253	0.596077	0.787795	0.186668	0.26045
ENSG00000076685	NT5C2	5'-nucleotidase, cytosolic II	22978	491	410	414	406	443	103	20.96	17.8945	17.791	22.4751	18.823	21.3025	0.129483	0.114456	0.253132	0.779133	0.719426	0.590621	0.48039	0.525753	0.256291
ENSG00000076706	MCAM	melanoma cell adhesion molecule	4162	294	308	237	238	148	25	8.71863	9.33853	7.07522	9.15259	4.36856	3.59191	0.00488282	-0.820836	-1.14257	1	0.00191421	0.0142552	0.984443	0.000135925	0.000363759
ENSG00000076716	GPC4	glypican 4	2239	254	204	216	181	127	37	11.2736	9.25731	9.65099	10.4177	5.61057	7.95635	-0.0716168	-0.723147	-0.259323	0.93317	0.00942995	0.732586	0.759003	0.00110803	0.4117
ENSG00000076770	MBNL3	muscleblind like splicing regulator 3	55796	42	14	24	30	12	3	0.757787	0.258257	0.435913	0.701916	0.215504	0.262242	0.409945	-1.04377	-0.801394	0.568482	0.11346	0.749976	0.244937	0.03328	0.436071
ENSG00000076826	CAMSAP3	calmodulin regulated spectrin associated protein family member 3	57662	474	589	472	397	472	60	21.5331	27.3571	21.5854	23.3875	21.3425	13.2058	-0.131283	-0.022523	-0.754589	0.792799	0.982977	0.0543214	0.502106	0.919086	0.0027832
ENSG00000076864	RAP1GAP	RAP1 GTPase activating protein	5909	328	332	242	320	252	35	12.5444	12.982	9.31713	15.8706	9.59296	6.48528	0.328073	-0.157237	-0.761393	0.32962	0.645523	0.117442	0.0835245	0.441564	0.0108812
ENSG00000076924	XAB2	XPA binding protein 2	56949	3535	3622	2988	2970	2951	536	167.216	175.172	142.285	182.184	138.942	122.839	0.050274	-0.0998379	-0.317335	0.930142	0.756798	0.342734	0.752502	0.572123	0.0832224
ENSG00000076928	ARHGEF1	Rho guanine nucleotide exchange factor 1	9138	1420	1424	1325	1498	1195	257	36.1908	37.1062	33.995	49.5093	30.3147	31.7341	0.345726	-0.121119	-0.0949003	0.224767	0.702402	0.876661	0.0399386	0.502248	0.637389
ENSG00000076944	STXBP2	syntaxin binding protein 2	6813	628	701	633	500	927	115	22.8998	26.1347	23.2363	23.6433	33.6456	20.3168	-0.15142	0.598236	-0.169172	0.732144	0.0051113	0.763523	0.420406	0.000498839	0.455006
ENSG00000076984	MAP2K7	mitogen-activated protein kinase kinase 7	5609	1190	1070	1208	1118	1060	176	50.9077	46.8001	52.0228	62.0218	45.1355	36.4782	0.190203	-0.0274889	-0.374461	0.587587	0.968481	0.305171	0.263554	0.894599	0.0671279
ENSG00000077009	NMRK2	nicotinamide riboside kinase 2	27231	0	0	0	0	0	0	0	0	0	0	0	0
ENSG00000077044	DGKD	diacylglycerol kinase delta	8527	503	491	372	518	402	79	11.3305	11.3081	8.43561	15.1314	9.01331	8.62172	0.424666	-0.0818211	-0.185658	0.139821	0.840179	0.761584	0.0174472	0.686776	0.452881
ENSG00000077063	CTTNBP2	cortactin binding protein 2	83992	25	24	27	35	10	3	0.789572	0.774978	0.858431	1.43346	0.31436	0.459047	0.701533	-1.23402	-0.731518	0.252269	0.0674547	0.797529	0.0497404	0.0159415	0.513725
ENSG00000077080	ACTL6B	actin like 6B	51412	0	0	1	0	0	0	0	0	0.0932537	0	0	0
ENSG00000077092	RARB	retinoic acid receptor beta	5915	0	0	1	0	0	0	0	0	0.0599326	0	0	0
ENSG00000077097	TOP2B	DNA topoisomerase II beta	7155	262	205	257	328	130	75	9.54111	7.6327	9.42152	15.4895	4.71212	13.2325	0.68218	-0.793013	0.655928	0.0116932	0.00358826	0.100218	0.00030483	0.000312037	0.00805356
ENSG00000077147	TM9SF3	transmembrane 9 superfamily member 3	56889	364	262	364	300	402	81	10.6908	7.86749	10.7622	11.426	11.7519	11.526	0.103082	0.384366	0.316549	0.847869	0.123054	0.50885	0.58994	0.0374196	0.187246
ENSG00000077150	NFKB2	nuclear factor kappa B subunit 2	4791	1946	1870	1550	1601	1377	237	90.8605	89.269	72.8542	96.937	63.9944	53.6123	0.0788005	-0.279475	-0.574615	0.870083	0.26594	0.0617179	0.633063	0.114838	0.00347137
ENSG00000077152	UBE2T	ubiquitin conjugating enzyme E2 T	29089	623	534	612	399	714	123	83.0042	72.7411	82.0831	68.9367	94.686	79.3965	-0.32431	0.374216	0.0803899	0.336679	0.112532	0.912668	0.087622	0.0328689	0.703844
ENSG00000077157	PPP1R12B	protein phosphatase 1 regulatory subunit 12B	4660	63	50	48	57	48	18	0.658141	0.534041	0.504789	0.77218	0.499108	0.911034	0.32573	-0.0621988	0.764274	0.583491	0.995896	0.346484	0.259486	0.940147	0.086077
ENSG00000077232	DNAJC10	DnaJ heat shock protein family (Hsp40) member C10	54431	140	103	184	150	111	47	1.40878	1.05969	1.8639	1.95736	1.11176	2.29137	0.314225	-0.260524	0.742146	0.435501	0.474443	0.118283	0.145953	0.273305	0.0110303
ENSG00000077235	GTF3C1	general transcription factor IIIC subunit 1	2975	2573	2462	1878	2309	1538	348	48.9811	47.9185	35.9894	57.0005	29.1421	32.0961	0.242067	-0.48496	-0.385469	0.434411	0.0348286	0.242423	0.145355	0.00623635	0.0414402
ENSG00000077238	IL4R	interleukin 4 receptor	3566	279	324	257	319	273	59	10.4365	12.3914	9.67771	15.4741	10.1645	10.6927	0.390119	0.024749	0.0580045	0.222085	0.971888	0.967806	0.0390911	0.901122	0.812582
ENSG00000077254	USP33	ubiquitin specific peptidase 33	23032	99	67	95	112	75	30	3.14975	2.17943	3.04267	4.62089	2.37508	4.62431	0.603847	-0.114636	0.805541	0.0985982	0.853617	0.180356	0.00964813	0.705582	0.022984
ENSG00000077264	PAK3	p21 (RAC1) activated kinase 3	5063	0	0	0	0	0	0	0	0	0	0	0	0
ENSG00000077274	CAPN6	calpain 6	827	40	41	23	29	20	1	2.49265	2.61223	1.44284	2.3435	1.24053	0.301915	-0.0189312	-0.692651	-2.73709	1	0.211469	0.150844	1	0.0818358	0.0167943
ENSG00000077279	DCX	doublecortin	1641	0	0	0	0	0	0	0	0	0	0	0	0
ENSG00000077312	SNRPA	small nuclear ribonucleoprotein polypeptide A	6626	2493	2505	2267	1796	2194	397	233.197	239.571	213.472	217.857	204.274	179.918	-0.193684	-0.0457749	-0.268721	0.596307	0.916298	0.457906	0.271552	0.805644	0.151473
ENSG00000077327	SPAG6	sperm associated antigen 6	9576	0	0	0	0	0	0	0	0	0	0	0	0
ENSG00000077348	EXOSC5	exosome component 5	56915	492	502	392	379	552	90	79.1591	82.5783	63.491	79.0753	88.3996	70.1556	-0.047758	0.353754	-0.0194348	0.962235	0.146657	1	0.822319	0.047994	0.969927
ENSG00000077380	DYNC1I2	dynein cytoplasmic 1 intermediate chain 2	1781	255	192	178	217	103	40	11.9544	9.20268	8.40034	13.192	4.80617	9.08512	0.300118	-0.914841	-0.036777	0.416893	0.00117979	1	0.133562	7.25057e-05	0.952286
ENSG00000077420	APBB1IP	amyloid beta precursor protein binding family B member 1 interacting protein	54518	0	0	0	0	0	0	0	0	0	0	0	0
ENSG00000077454	LRCH4	leucine rich repeats and calponin homology domain containing 4	4034	85	92	43	96	32	16	2.62872	2.90897	1.3387	3.85001	0.985032	2.39734	0.626078	-1.096	0.144254	0.100734	0.00514491	0.959436	0.0101337	0.00050315	0.79876
ENSG00000077458	FAM76B	family with sequence similarity 76 member B	143684	26	18	24	19	14	3	0.948869	0.671633	0.881727	0.899191	0.508553	0.530442	-0.015455	-0.592857	-0.571132	1	0.435619	0.874088	1	0.240407	0.633585
ENSG00000077463	SIRT6	sirtuin 6	51548	389	430	450	344	505	74	31.1456	35.2	36.2702	35.7167	40.2452	28.7054	-0.0625254	0.350378	-0.176756	0.932352	0.153285	0.782673	0.75652	0.051433	0.490866
ENSG00000077498	TYR	tyrosinase	7299	0	0	0	0	0	0	0	0	0	0	0	0
ENSG00000077514	POLD3	DNA polymerase delta 3, accessory subunit	10714	150	129	167	144	142	34	6.00166	5.27712	6.72647	7.47152	5.65515	6.59088	0.192228	0.0313224	0.212247	0.691227	0.971539	0.803014	0.371009	0.899891	0.524214
ENSG00000077522	ACTN2	actinin alpha 2	88	5	0	1	0	0	0	0.181572	0	0.0365568	0	0	0
ENSG00000077549	CAPZB	capping actin protein of muscle Z-line subunit beta	832	2336	2364	2224	1640	2211	375	158.739	164.242	152.137	144.518	149.546	123.46	-0.255709	0.0344179	-0.281906	0.436893	0.929484	0.429885	0.14679	0.826304	0.134074
ENSG00000077585	GPR137B	G protein-coupled receptor 137B	7107	39	41	66	41	23	5	3.72082	3.99931	6.33882	5.07252	2.18413	2.31115	-0.0104785	-0.981682	-0.939344	1	0.0306277	0.467147	1	0.00521305	0.157214
ENSG00000077616	NAALAD2	N-acetylated alpha-linked acidic dipeptidase 2	10003	0	0	0	0	0	0	0	0	0	0	0	0
ENSG00000077684	JADE1	jade family PHD finger 1	79960	243	242	241	218	256	68	5.90859	6.01616	5.89909	6.87385	6.19574	8.0107	0.0867924	0.177707	0.508371	0.892171	0.574271	0.253346	0.677133	0.365393	0.0457953
ENSG00000077713	SLC25A43	solute carrier family 25 member 43	203427	114	93	83	97	41	25	8.83815	7.37167	6.47776	9.75201	3.16385	9.39033	0.244591	-1.13605	0.390815	0.648108	0.00148611	0.615589	0.324827	9.83789e-05	0.278758
ENSG00000077721	UBE2A	ubiquitin conjugating enzyme E2 A	7319	713	579	733	543	465	124	30.1387	25.023	31.191	29.7646	19.5642	25.3945	-0.0744166	-0.438915	-0.102488	0.906182	0.0773196	0.889387	0.705151	0.019193	0.657326
ENSG00000077782	FGFR1	fibroblast growth factor receptor 1	2260	795	686	638	735	553	128	12.6413	11.1525	10.2125	15.1557	8.75233	9.86091	0.297377	-0.253847	-0.121614	0.336516	0.350027	0.843729	0.0875572	0.173634	0.588074
ENSG00000077800	FKBP6	FKBP prolyl isomerase family member 6 (inactive)	8468	0	0	0	0	0	0	0	0	0	0	0	0
ENSG00000077935	SMC1B	structural maintenance of chromosomes 1B	27127	0	0	1	0	2	0	0	0	0.0520975	0	0.103023	0
ENSG00000077942	FBLN1	fibulin 1	2192	286	312	297	215	291	36	8.64089	9.6377	9.03315	8.42358	8.75106	5.26962	-0.236101	0.0595866	-0.711468	0.580499	0.885173	0.147104	0.256121	0.755005	0.0158995
ENSG00000077943	ITGA8	integrin subunit alpha 8	8516	0	0	2	1	0	0	0	0	0.0605384	0.0389921	0	0
ENSG00000077984	CST7	cystatin F	8530	0	0	0	0	0	0	0	0	0	0	0	0
ENSG00000078018	MAP2	microtubule associated protein 2	4133	34	36	19	29	22	6	0.647412	0.700859	0.364205	0.716087	0.416965	0.553525	0.20474	-0.332231	0.0349069	0.833647	0.645308	1	0.563861	0.441284	1
ENSG00000078043	PIAS2	protein inhibitor of activated STAT 2	9063	87	80	94	75	83	29	1.09203	1.02667	1.18778	1.2208	1.03698	1.76359	0.0238958	0.0292509	0.754569	1	1	0.216829	0.927949	0.947148	0.0332269
ENSG00000078053	AMPH	amphiphysin	273	0	0	0	0	0	0	0	0	0	0	0	0
ENSG00000078061	ARAF	A-Raf proto-oncogene, serine/threonine kinase	369	904	865	754	737	736	117	56.2861	55.065	47.2601	59.5067	45.6127	35.2941	0.048111	-0.0946844	-0.504394	0.941428	0.785666	0.173659	0.775161	0.611327	0.0211592
ENSG00000078070	MCCC1	methylcrotonyl-CoA carboxylase subunit 1	56922	58	59	50	45	52	13	2.96123	3.0798	2.56983	2.97936	2.64255	3.21567	-0.0687074	-0.00114112	0.241621	0.991012	1	0.847994	0.889359	1	0.594105
ENSG00000078081	LAMP3	lysosomal associated membrane protein 3	27074	37	22	36	35	11	3	2.15158	1.30799	2.10741	2.63931	0.636684	0.845204	0.382597	-1.41702	-1.05016	0.615569	0.0188557	0.559495	0.29183	0.00271941	0.225779
ENSG00000078098	FAP	fibroblast activation protein alpha	2191	0	0	0	0	0	0	0	0	0	0	0	0
ENSG00000078114	NEBL	nebulette	10529	92	67	123	96	68	16	1.48303	1.10424	1.99599	2.00678	1.09105	1.24959	0.268721	-0.36873	-0.212989	0.595127	0.353933	0.899313	0.269775	0.176612	0.676016
ENSG00000078124	ACER3	alkaline ceramidase 3	55331	95	67	93	91	66	15	2.47685	1.78599	2.4409	3.07669	1.71276	1.89475	0.3378	-0.265562	-0.1598	0.484938	0.571072	0.958701	0.177551	0.362247	0.796128
ENSG00000078140	UBE2K	ubiquitin conjugating enzyme E2 K	3093	638	474	645	506	565	164	27.109	20.5919	27.5894	27.881	23.8955	33.7614	0.0295559	0.047807	0.506538	0.982101	0.903116	0.129118	0.868867	0.782942	0.0126927
ENSG00000078142	PIK3C3	phosphatidylinositol 3-kinase catalytic subunit type 3	5289	89	60	65	52	32	14	1.2913	0.89005	0.94938	0.978376	0.462128	0.984121	-0.214854	-1.0538	-0.00581724	0.778986	0.00773698	1	0.479828	0.000853807	1
ENSG00000078177	N4BP2	NEDD4 binding protein 2	55728	23	14	14	21	2	6	0.515984	0.321117	0.316175	0.610933	0.0446595	0.652145	0.54095	-2.9163	0.833756	0.585837	0.00272147	0.555255	0.261894	0.000217389	0.222774
ENSG00000078237	TIGAR	TP53 induced glycolysis regulatory phosphatase	57103	39	38	38	59	31	9	0.90893	0.905474	0.891538	1.78313	0.719123	1.01623	0.858005	-0.208367	0.249075	0.0497788	0.804964	0.876661	0.00302219	0.636658	0.637477
ENSG00000078246	TULP3	TUB like protein 3	7289	536	499	413	444	332	71	37.1105	35.3231	28.7854	39.8639	22.8794	23.8163	0.118688	-0.44138	-0.423259	0.800425	0.0886757	0.34379	0.512443	0.0235874	0.0842761
ENSG00000078269	SYNJ2	synaptojanin 2	8871	276	278	288	338	301	69	4.85323	4.99796	5.09806	7.70734	5.26822	5.87834	0.50516	0.197155	0.315375	0.0834784	0.511531	0.532235	0.00719853	0.305449	0.20312
ENSG00000078295	ADCY2	adenylate cyclase 2	108	0	0	0	0	0	0	0	0	0	0	0	0
ENSG00000078304	PPP2R5C	protein phosphatase 2 regulatory subunit B'gamma	5527	382	316	426	349	373	72	5.88415	4.97661	6.60572	6.97126	5.71879	5.37325	0.136387	0.0914922	-0.0381786	0.764947	0.791928	1	0.459929	0.620846	0.898108
ENSG00000078319	PMS2P1	PMS1 homolog 2, mismatch repair system component pseudogene 1		140	129	210	120	169	37	25.0929	23.6396	37.8908	27.8914	30.1499	32.1299	-0.175049	0.177797	0.229686	0.764345	0.599344	0.761434	0.458922	0.390226	0.452588
ENSG00000078328	RBFOX1	RNA binding fox-1 homolog 1	54715	0	0	0	0	0	0	0	0	0	0	0	0
ENSG00000078369	GNB1	G protein subunit beta 1	2782	4642	4615	4505	3307	3741	776	159.219	161.841	155.552	147.092	127.718	128.954	-0.23477	-0.197729	-0.223632	0.483979	0.452843	0.544317	0.176877	0.255159	0.213826
ENSG00000078399	HOXA9	homeobox A9	3205	379	327	497	308	326	103	27.5036	24.2619	36.3075	28.9845	23.5474	36.2135	-0.142988	-0.201885	0.379079	0.777225	0.511396	0.354481	0.475213	0.305165	0.0905657
ENSG00000078401	EDN1	endothelin 1	1906	0	0	0	0	3	0	0	0	0	0	0.322964	0
ENSG00000078403	MLLT10	MLLT10 histone lysine methyltransferase DOT1L cofactor	8028	186	125	165	142	133	35	4.48399	3.08097	4.00429	4.43921	3.19138	4.08793	0.0810034	-0.154125	0.162983	0.899472	0.710451	0.847083	0.6919	0.513499	0.592293
ENSG00000078487	ZCWPW1	zinc finger CW-type and PWWP domain containing 1	55063	10	18	24	16	54	6	0.663354	1.2208	1.60268	1.37636	3.56545	1.92833	0.120215	1.72775	0.803032	0.98382	9.42148e-06	0.629609	0.874594	1.83143e-07	0.292415
ENSG00000078549	ADCYAP1R1	ADCYAP receptor type I	117	0	1	1	2	3	0	0	0.0329383	0.0324313	0.0835545	0.0961991	0
ENSG00000078579	FGF20	fibroblast growth factor 20	26281	0	0	0	0	0	0	0	0	0	0	0	0
ENSG00000078589	P2RY10	P2Y receptor family member 10	27334	0	0	0	0	0	0	0	0	0	0	0	0
ENSG00000078596	ITM2A	integral membrane protein 2A	9452	0	0	0	0	0	0	0	0	0	0	0	0
ENSG00000078618	NRDC	nardilysin convertase	4898	1139	1034	1083	703	1425	238	37.0139	34.3548	35.4291	29.6253	46.0926	37.4716	-0.387842	0.490562	0.152052	0.205082	0.0231642	0.73702	0.0339337	0.00356667	0.421238
ENSG00000078668	VDAC3	voltage dependent anion channel 3	7419	2160	2048	2057	1304	1742	398	149.456	144.882	143.279	117.004	119.973	133.421	-0.441287	-0.164367	-0.0508877	0.117525	0.56076	0.960455	0.0130576	0.352641	0.800507
ENSG00000078674	PCM1	pericentriolar material 1	5108	231	143	196	198	165	57	3.51979	2.22775	3.00643	3.91233	2.50244	4.20788	0.301558	-0.102077	0.6074	0.430611	0.83491	0.183997	0.142501	0.678134	0.0243643
ENSG00000078687	TNRC6C	trinucleotide repeat containing adaptor 6C	57690	138	111	135	133	132	29	2.73368	2.24811	2.69211	3.41654	2.60266	2.78324	0.294312	0.142701	0.199585	0.495549	0.712523	0.828288	0.184912	0.515711	0.562934
ENSG00000078699	CBFA2T2	CBFA2/RUNX1 partner transcriptional co-repressor 2	9139	109	111	125	114	111	29	2.53685	2.6413	2.92866	3.44064	2.57138	3.27002	0.224322	0.045175	0.351755	0.646729	0.936323	0.6507	0.321075	0.838187	0.312223
ENSG00000078725	BRINP1	BMP/retinoic acid inducible neural specific 1	1620	0	0	0	0	0	0	0	0	0	0	0	0
ENSG00000078747	ITCH	itchy E3 ubiquitin protein ligase	83737	202	148	189	226	171	67	4.33379	3.24642	4.08196	6.28769	3.65165	6.96427	0.571048	0.0281844	0.919238	0.0634702	0.966513	0.0158549	0.00447201	0.891361	0.000420467
ENSG00000078795	PKD2L2	polycystin 2 like 2, transient receptor potential cation channel	27039	0	0	0	0	1	0	0	0	0	0	0.047083	0
ENSG00000078804	TP53INP2	tumor protein p53 inducible nuclear protein 2	58476	167	166	174	175	143	26	8.79561	8.9389	9.22549	11.9524	7.49654	6.63448	0.287596	-0.144288	-0.360066	0.482576	0.736164	0.656374	0.176114	0.546837	0.31798
ENSG00000078808	SDF4	stromal cell derived factor 4	51150	2354	2552	2239	1829	1967	366	109.192	121.03	104.551	110.018	90.8167	82.2528	-0.144619	-0.180534	-0.363209	0.725634	0.511204	0.272724	0.413471	0.304947	0.0536709
ENSG00000078814	MYH7B	myosin heavy chain 7B	57644	0	2	0	1	6	1	0	0.056748	0	0.0359882	0.165737	0.134455
ENSG00000078898	BPIFB2	BPI fold containing family B member 2	80341	0	0	0	0	0	0	0	0	0	0	0	0
ENSG00000078900	TP73	tumor protein p73	7161	494	464	433	418	297	79	16.0677	15.4302	14.1776	17.6306	9.61519	12.4491	0.088952	-0.544741	-0.211994	0.862625	0.0321669	0.719266	0.620878	0.00557172	0.389374
ENSG00000078902	TOLLIP	toll interacting protein	54472	437	463	474	393	546	65	16.0762	17.4145	17.5538	18.7483	19.9927	11.5851	0.0155428	0.348974	-0.477746	1	0.151369	0.280511	0.923539	0.050345	0.0560346
ENSG00000078967	UBE2D4	ubiquitin conjugating enzyme E2 D4 (putative)	51619	303	266	298	255	377	66	14.1443	12.6955	14.0038	15.4364	17.5169	14.9269	0.0581726	0.481227	0.210664	0.937919	0.0476147	0.731365	0.769983	0.00964382	0.408968
ENSG00000079101	CLUL1	clusterin like 1	27098	9	4	5	0	1	3	0.515057	0.234045	0.288053	0	0.0569624	0.831798	-5.55913	-2.3551	1.31922	0.136291	0.185422	0.544317	0.0167791	0.0676824	0.21433
ENSG00000079102	RUNX1T1	RUNX1 partner transcriptional co-repressor 1	862	0	0	0	0	0	0	0	0	0	0	0	0
ENSG00000079112	CDH17	cadherin 17	1015	0	0	3	1	2	0	0	0	0.171406	0.0736004	0.112985	0
ENSG00000079134	THOC1	THO complex subunit 1	9984	65	55	57	46	80	15	1.76581	1.52763	1.55882	1.62052	2.16319	1.97426	-0.119861	0.536406	0.364869	0.915296	0.126078	0.727066	0.723554	0.0387835	0.39956
ENSG00000079150	FKBP7	FKBP prolyl isomerase 7	51661	13	13	34	11	14	3	0.928998	0.94982	2.44591	1.01937	0.995806	1.03867	-0.620262	-0.41518	-0.3937	0.605837	0.668937	1	0.280257	0.46743	0.90531
ENSG00000079156	OSBPL6	oxysterol binding protein like 6	114880	52	42	58	60	74	14	0.996279	0.822723	1.11865	1.49072	1.41119	1.29954	0.481464	0.642917	0.48424	0.355139	0.0736693	0.672225	0.097181	0.017972	0.339154
ENSG00000079215	SLC1A3	solute carrier family 1 member 3	6507	121	111	90	105	43	27	4.25095	3.98704	3.18298	4.78361	1.50364	4.59567	0.207113	-1.21922	0.350067	0.71484	0.000411264	0.658781	0.399892	1.90659e-05	0.324016
ENSG00000079246	XRCC5	X-ray repair cross complementing 5	7520	4716	4484	3978	3022	3308	795	190.005	184.707	161.341	157.889	132.657	155.182	-0.300962	-0.311365	-0.124913	0.329854	0.196009	0.783065	0.0838849	0.0734935	0.491338
ENSG00000079257	LXN	latexin	56925	0	0	1	0	0	0	0	0	0.151865	0	0	0
ENSG00000079263	SP140	SP140 nuclear body protein	11262	0	0	0	0	0	0	0	0	0	0	0	0
ENSG00000079277	MKNK1	MAPK interacting serine/threonine kinase 1	8569	285	249	236	172	209	54	7.77308	6.94344	6.47964	6.08335	5.67375	7.13553	-0.337819	-0.197671	0.0930875	0.379206	0.558001	0.921087	0.110469	0.349972	0.716934
ENSG00000079308	TNS1	tensin 1	7145	198	168	113	157	95	20	2.67674	2.32208	1.53783	2.75237	1.27832	1.30995	0.216259	-0.648548	-0.652928	0.635654	0.033504	0.327227	0.311822	0.00591978	0.0770306
ENSG00000079313	REXO1	RNA exonuclease 1 homolog	57455	677	669	492	775	554	98	26.7088	26.9847	19.5398	39.6491	21.7546	18.7316	0.577657	-0.0474012	-0.302968	0.0222739	0.925178	0.509356	0.000842151	0.819854	0.187818
ENSG00000079332	SAR1A	secretion associated Ras related GTPase 1A	56681	699	622	698	516	760	126	22.252	20.2446	22.3686	21.3014	24.0814	19.4333	-0.144576	0.273118	-0.0760031	0.751025	0.2687	0.940597	0.443046	0.116778	0.75518
ENSG00000079335	CDC14A	cell division cycle 14A	8556	13	18	16	24	6	4	0.439526	0.622214	0.544567	1.05225	0.201915	0.655217	0.847417	-1.27151	0.367057	0.225773	0.122311	0.949751	0.0402079	0.0370751	0.777628
ENSG00000079337	RAPGEF3	Rap guanine nucleotide exchange factor 3	10411	21	13	21	15	21	2	0.381804	0.241652	0.384354	0.353654	0.380028	0.176171	-0.0501291	0.292244	-0.845012	1	0.724855	0.808787	1	0.532384	0.532372
ENSG00000079385	CEACAM1	CEA cell adhesion molecule 1	634	54	40	28	38	29	11	2.16256	1.6378	1.12882	1.97344	1.15598	2.13428	0.141931	-0.387052	0.454898	0.896166	0.524097	0.751555	0.685357	0.316489	0.439144
ENSG00000079387	SENP1	SUMO specific peptidase 1	29843	111	106	92	116	74	16	3.99595	3.90148	3.33407	5.41527	2.65157	2.79062	0.409503	-0.378899	-0.344905	0.322192	0.309382	0.768218	0.0797409	0.143732	0.463532
ENSG00000079393	DUSP13B	dual specificity phosphatase 13B	51207	5	5	1	4	5	0	0.468101	0.478593	0.0942453	0.485619	0.465924	0
ENSG00000079432	CIC	capicua transcriptional repressor	23152	1182	1113	912	1183	695	134	27.4025	26.3812	21.2842	35.565	16.0374	15.0509	0.385262	-0.522846	-0.65419	0.165332	0.0264059	0.0459781	0.0232702	0.00426869	0.00217186
ENSG00000079435	LIPE	lipase E, hormone sensitive type	3991	133	166	120	148	85	16	5.67205	7.23807	5.15181	8.18494	3.60813	3.30592	0.319315	-0.620635	-0.786172	0.429363	0.0533614	0.260388	0.141687	0.0112569	0.0483379
ENSG00000079459	FDFT1	farnesyl-diphosphate farnesyltransferase 1	2222	2466	2533	2300	2119	2559	487	104.439	109.681	98.059	116.377	107.874	99.9269	0.0377528	0.169084	0.0188948	0.958644	0.513942	1	0.811053	0.307458	0.902563
ENSG00000079462	PAFAH1B3	platelet activating factor acetylhydrolase 1b catalytic subunit 3	5050	1891	1989	1889	1439	1974	343	293.313	315.429	294.959	289.445	304.763	257.761	-0.181766	0.133409	-0.148021	0.630458	0.629013	0.751638	0.305627	0.422331	0.440918
ENSG00000079482	OPHN1	oligophrenin 1	4983	26	20	31	26	21	5	0.707458	0.556396	0.84914	0.917416	0.568751	0.659145	0.255914	-0.190869	-0.0187642	0.834471	0.844084	1	0.565071	0.69207	1
ENSG00000079557	AFM	afamin	173	0	0	0	0	0	0	0	0	0	0	0	0
ENSG00000079616	KIF22	kinesin family member 22	3835	3547	3422	2881	2792	2377	517	181.052	178.587	148.039	184.81	120.767	127.855	0.00472092	-0.368278	-0.325793	1	0.118408	0.325227	0.963577	0.0354197	0.0759891
ENSG00000079689	SCGN	secretagogin, EF-hand calcium binding protein	10590	0	0	0	0	1	0	0	0	0	0	0.147825	0
ENSG00000079691	CARMIL1	capping protein regulator and myosin 1 linker 1	55604	119	120	100	100	71	16	3.82198	3.94048	3.23319	4.16492	2.26973	2.48969	0.0616301	-0.572478	-0.47884	0.955224	0.0962375	0.610114	0.804315	0.0264991	0.273689
ENSG00000079739	PGM1	phosphoglucomutase 1	5236	1098	1085	957	808	877	209	59.2766	59.8877	52.0096	56.5664	47.1255	54.6653	-0.135405	-0.15804	0.0162535	0.7651	0.593905	1	0.460235	0.385185	0.923258
ENSG00000079785	DDX1	DEAD-box helicase 1	1653	801	799	751	536	711	146	45.9955	46.909	43.4124	39.913	40.6376	40.6181	-0.310407	-0.0436989	-0.0841802	0.347682	0.931164	0.919215	0.0936209	0.829121	0.713499
ENSG00000079805	DNM2	dynamin 2	1785	2265	2214	1853	2002	1520	298	37.0846	37.0621	30.5416	42.5065	24.7711	23.6388	0.162097	-0.376097	-0.483378	0.652768	0.113844	0.122363	0.33009	0.0334461	0.0116791
ENSG00000079819	EPB41L2	erythrocyte membrane protein band 4.1 like 2	2037	506	402	401	501	262	66	10.7918	8.76587	8.60948	13.8563	5.56185	6.81978	0.440183	-0.635573	-0.381289	0.122447	0.0113046	0.429885	0.0140115	0.00140835	0.13323
ENSG00000079841	RIMS1	regulating synaptic membrane exocytosis 1	22999	0	0	0	0	0	0	0	0	0	0	0	0
ENSG00000079931	MOXD1	monooxygenase DBH like 1	26002	5	2	5	1	2	0	0.210704	0.0861705	0.212111	0.0546472	0.0838895	0
ENSG00000079950	STX7	syntaxin 7	8417	104	63	93	50	88	27	1.39687	0.865147	1.25746	0.87088	1.17647	1.75699	-0.551518	0.122018	0.660078	0.255356	0.818329	0.304458	0.0509007	0.654499	0.0666604
ENSG00000079974	RABL2B	RAB, member of RAS oncogene family like 2B	11158	252	237	235	256	212	52	9.44897	9.08571	8.87038	12.4477	7.91216	9.44651	0.32325	-0.0894833	0.126299	0.354384	0.838079	0.881158	0.0965857	0.683659	0.645005
ENSG00000079999	KEAP1	kelch like ECH associated protein 1	9817	2678	2750	2282	2178	2506	396	164.968	173.2	141.513	173.985	153.655	118.187	-0.00127509	0.0602457	-0.358151	1	0.855599	0.278796	0.99217	0.709234	0.0555357
ENSG00000080007	DDX43	DEAD-box helicase 43	55510	0	0	0	0	0	0	0	0	0	0	0	0
ENSG00000080031	PTPRH	protein tyrosine phosphatase receptor type H	5794	90	98	88	82	68	16	4.55905	5.07557	4.48751	5.38657	3.4286	3.92678	0.071084	-0.339238	-0.183507	0.941746	0.401463	0.944293	0.775667	0.213041	0.761506
ENSG00000080166	DCT	dopachrome tautomerase	1638	0	0	0	0	0	0	0	0	0	0	0	0
ENSG00000080189	SLC35C2	solute carrier family 35 member C2	51006	620	616	639	601	613	119	17.704	17.9841	18.3684	22.2546	17.4227	16.4631	0.180696	0.068381	-0.0531276	0.629015	0.842206	0.9779	0.304045	0.689517	0.831183
ENSG00000080200	CRYBG3	crystallin beta-gamma domain containing 3	131544	52	23	38	55	15	24	1.04247	0.471426	0.76689	1.42984	0.299313	2.33107	0.78539	-1.22134	1.68948	0.0964173	0.0219086	0.00399303	0.00926172	0.00330604	5.41473e-05
ENSG00000080224	EPHA6	EPH receptor A6	285220	0	0	0	0	0	0	0	0	0	0	0	0
ENSG00000080293	SCTR	secretin receptor	6344	0	0	0	0	0	0	0	0	0	0	0	0
ENSG00000080298	RFX3	regulatory factor X3	5991	30	18	19	35	18	0	0.591193	0.362666	0.376922	0.89442	0.353066	0	0.884162	-0.210915	-7.16652	0.118918	0.854829	0.0519013	0.0133455	0.70796	0.00257253
ENSG00000080345	RIF1	replication timing regulatory factor 1	55183	123	58	97	136	63	40	1.49028	0.718484	1.18311	2.13682	0.759764	2.34805	0.795609	-0.453839	1.13214	0.0140382	0.247838	0.0154035	0.000407925	0.103291	0.000399236
ENSG00000080371	RAB21	RAB21, member RAS oncogene family	23011	147	132	195	221	144	56	2.01613	1.85098	2.69232	3.9306	1.9658	3.72112	0.721107	-0.0372326	0.842925	0.0133255	0.964168	0.0493522	0.000369825	0.887974	0.00238354
ENSG00000080493	SLC4A4	solute carrier family 4 member 4	8671	0	1	0	0	0	0	0	0.0246748	0	0	0	0
ENSG00000080503	SMARCA2	SWI/SNF related, matrix associated, actin dependent regulator of chromatin, subfamily a, member 2	6595	90	85	55	76	24	18	1.06529	1.02866	0.655358	1.16656	0.282756	1.03224	0.226168	-1.57257	0.250582	0.688632	8.97842e-05	0.808787	0.368742	2.77689e-06	0.532219
ENSG00000080511	RDH8	retinol dehydrogenase 8	50700	0	0	0	0	0	0	0	0	0	0	0	0
ENSG00000080546	SESN1	sestrin 1	27244	78	47	88	65	55	22	3.35245	2.06534	3.8075	3.62282	2.35291	4.58114	0.112401	-0.268738	0.651039	0.910484	0.57763	0.367888	0.715068	0.368456	0.0961241
ENSG00000080561	MID2	midline 2	11043	22	17	15	26	16	2	1.56352	1.23525	1.07315	2.39618	1.13182	0.688644	0.765202	-0.0712977	-0.818812	0.28061	1	0.841842	0.0613519	1	0.584169
ENSG00000080572	DNAAF6	dynein axonemal assembly factor 6	139212	1	0	0	0	0	0	0.113983	0	0	0	0	0
ENSG00000080573	COL5A3	collagen type V alpha 3 chain	50509	2	2	2	5	3	3	0.0648978	0.0663524	0.0653312	0.210395	0.096894	0.471634	1.5008	0.649497	2.8319	0.556107	0.912748	0.243865	0.235185	0.798634	0.0421429
ENSG00000080603	SRCAP	Snf2 related CREBBP activator protein	10847	60	36	50	76	54	13	0.967902	0.593758	0.811971	1.58986	0.867061	1.01603	0.881732	0.248998	0.437325	0.0226087	0.592163	0.70116	0.000865382	0.382969	0.368558
ENSG00000080608	PUM3	pumilio RNA binding family member 3	9933	131	107	111	117	174	24	11.2061	9.35821	9.55863	12.9788	14.8152	9.94667	0.247601	0.678984	0.0648991	0.602822	0.0114238	0.991704	0.27674	0.00142702	0.867095
ENSG00000080618	CPB2	carboxypeptidase B2	1361	0	0	0	0	0	0	0	0	0	0	0	0
ENSG00000080644	CHRNA3	cholinergic receptor nicotinic alpha 3 subunit	1136	1	2	0	0	0	0	0.04623	0.0945323	0	0	0	0
ENSG00000080709	KCNN2	potassium calcium-activated channel subfamily N member 2	3781	1	0	0	0	0	0	0.0339191	0	0	0	0	0
ENSG00000080802	CNOT4	CCR4-NOT transcription complex subunit 4	4850	175	176	156	184	160	38	5.50331	5.65881	4.93857	7.5036	5.0082	5.78967	0.360268	0.0180069	0.187247	0.329854	1	0.812546	0.0839289	0.951526	0.536931
ENSG00000080815	PSEN1	presenilin 1	5663	386	361	383	281	333	82	8.54117	8.16702	8.53137	8.0631	7.33415	8.79079	-0.184549	-0.0804958	0.140984	0.672662	0.843761	0.817089	0.353586	0.691467	0.544944
ENSG00000080819	CPOX	coproporphyrinogen oxidase	1371	922	849	931	751	471	181	64.2804	60.5176	65.3412	67.8974	32.6846	61.1378	-0.0239936	-0.837781	0.0257064	1	0.000239472	0.998387	0.914035	9.72605e-06	0.886158
ENSG00000080822	CLDND1	claudin domain containing 1	56650	372	319	458	404	376	89	15.7155	13.7785	19.4778	22.1326	15.8106	18.2162	0.314914	0.0705063	0.234975	0.335462	0.855319	0.648892	0.0871261	0.70848	0.310478
ENSG00000080823	MOK	MOK protein kinase	5891	61	59	79	35	77	13	1.22212	1.20854	1.59331	0.909319	1.5355	1.26186	-0.683231	0.311166	-0.0112291	0.190205	0.426178	1	0.0295281	0.233217	1
ENSG00000080824	HSP90AA1	heat shock protein 90 alpha family class A member 1	3320	20140	15111	17949	18790	18311	4718	844.671	647.96	757.807	1021.93	764.391	958.672	0.325061	0.146949	0.433873	0.242047	0.57417	0.0988808	0.0456419	0.365268	0.00784706
ENSG00000080839	RBL1	RB transcriptional corepressor like 1	5933	81	66	60	78	114	23	2.99331	2.49366	2.23208	3.7379	4.19322	4.11793	0.415815	0.821971	0.755853	0.363381	0.00566863	0.284907	0.101829	0.000574437	0.0580583
ENSG00000080845	DLGAP4	DLG associated protein 4	22839	771	679	594	743	538	113	19.308	17.3852	14.9747	24.1289	13.4104	13.7102	0.364889	-0.241615	-0.249495	0.211606	0.379014	0.598435	0.0356493	0.194951	0.263959
ENSG00000080854	IGSF9B	immunoglobulin superfamily member 9B	22997	134	128	134	121	145	23	1.64962	1.61107	1.66063	1.93166	1.77673	1.3718	0.112324	0.232411	-0.180113	0.860805	0.496375	0.900254	0.616075	0.293474	0.677676
ENSG00000080910	CFHR2	complement factor H related 2	3080	0	0	0	0	0	0	0	0	0	0	0	0
ENSG00000080947	CROCCP3	CROCC pseudogene 3	114819	10	6	16	7	26	3	0.318756	0.19554	0.513415	0.289349	0.824911	0.463301	-0.364247	1.37241	0.504606	0.894124	0.0115967	0.891249	0.68094	0.00145714	0.661046
ENSG00000080986	NDC80	NDC80 kinetochore complex component	10403	158	125	98	154	92	14	9.78502	7.91482	6.10972	12.3678	5.67111	4.20065	0.518548	-0.364673	-0.836507	0.133739	0.299732	0.252503	0.0162327	0.137072	0.0455754
ENSG00000081014	AP4E1	adaptor related protein complex 4 subunit epsilon 1	23431	50	37	54	48	57	12	1.49647	1.13221	1.62698	1.86297	1.69804	1.74006	0.268667	0.37552	0.370789	0.701711	0.364974	0.7738	0.383705	0.184462	0.474037
ENSG00000081019	RSBN1	round spermatid basic protein 1	54665	87	64	67	65	30	17	2.80815	2.11207	2.17704	2.7207	0.963825	2.65849	0.079178	-1.17384	0.246454	0.959896	0.00297062	0.856705	0.817547	0.000246461	0.60443
ENSG00000081026	MAGI3	membrane associated guanylate kinase, WW and PDZ domain containing 3	260425	39	28	34	44	39	5	1.0202	0.748866	0.895342	1.49258	1.01545	0.633685	0.623516	0.309531	-0.407312	0.270458	0.56173	0.894533	0.0564615	0.353473	0.667453
ENSG00000081041	CXCL2	C-X-C motif chemokine ligand 2	2920	2	3	2	2	2	0	0.31488	0.482906	0.316982	0.408329	0.313415	0
ENSG00000081051	AFP	alpha fetoprotein	174	0	2	0	0	2	0	0	0.140602	0	0	0.136881	0
ENSG00000081052	COL4A4	collagen type IV alpha 4 chain	1286	25	34	28	28	24	5	0.546102	0.759345	0.615719	0.793154	0.52182	0.529161	0.185527	-0.176125	-0.195463	0.863963	0.83477	1	0.623473	0.677853	0.925543
ENSG00000081059	TCF7	transcription factor 7	6932	506	464	402	385	242	53	11.0345	10.3454	8.82507	10.8875	5.25282	5.59966	-0.0091441	-0.81955	-0.767063	1	0.000819173	0.0591295	0.991712	4.48712e-05	0.00316384
ENSG00000081087	OSTM1	osteoclastogenesis associated transmembrane protein 1	28962	34	15	25	28	25	4	1.40534	0.633899	1.04024	1.50081	1.02853	0.801026	0.421426	0.118408	-0.27951	0.632149	0.922206	1	0.30746	0.815215	0.916782
ENSG00000081138	CDH7	cadherin 7	1005	0	0	0	0	0	0	0	0	0	0	0	0
ENSG00000081148	IMPG2	interphotoreceptor matrix proteoglycan 2	50939	0	0	1	3	0	1	0	0	0.0265291	0.102522	0	0.127678
ENSG00000081154	PCNP	PEST proteolytic signal containing nuclear protein	57092	323	238	308	245	298	77	23.3473	17.5889	22.4117	22.965	21.4401	26.9656	-0.00103487	0.140578	0.431443	1	0.668775	0.326296	1	0.467115	0.0764209
ENSG00000081177	EXD2	exonuclease 3'-5' domain containing 2	55218	341	283	299	267	223	52	11.9838	10.1684	10.5779	12.1679	7.80045	8.85374	0.0352918	-0.365176	-0.222296	0.975672	0.199853	0.747556	0.851523	0.0753754	0.432554
ENSG00000081181	ARG2	arginase 2	384	66	63	55	36	46	8	6.36019	6.20716	5.33555	4.49878	4.41224	3.73508	-0.528904	-0.316746	-0.59577	0.346309	0.539536	0.658946	0.0930204	0.332011	0.324983
ENSG00000081189	MEF2C	myocyte enhancer factor 2C	4208	24	35	31	16	13	3	0.449377	0.67003	0.584321	0.388495	0.24228	0.272148	-0.666651	-1.10371	-0.975552	0.378196	0.0655552	0.63308	0.10977	0.0152118	0.296554
ENSG00000081237	PTPRC	protein tyrosine phosphatase receptor type C	5788	0	0	0	0	0	0	0	0	0	0	0	0
ENSG00000081248	CACNA1S	calcium voltage-gated channel subunit alpha1 S	779	0	0	0	0	1	0	0	0	0	0	0.0361932	0
ENSG00000081277	PKP1	plakophilin 1	5317	3	0	0	1	1	0	0.106312	0	0	0.0459543	0.0352725	0
ENSG00000081307	UBA5	ubiquitin like modifier activating enzyme 5	79876	182	138	181	123	189	35	5.86764	4.54881	5.87437	5.14237	6.06498	5.46694	-0.201207	0.277302	0.0878451	0.715941	0.352606	0.956642	0.40283	0.175511	0.793321
ENSG00000081320	STK17B	serine/threonine kinase 17b	9262	26	12	30	17	14	8	0.871554	0.411272	1.01235	0.738985	0.467116	1.29926	-0.174517	-0.592433	0.835116	0.928432	0.435619	0.552201	0.749754	0.240407	0.219405
ENSG00000081377	CDC14B	cell division cycle 14B	8555	183	146	137	156	114	33	3.8452	3.13652	2.89787	4.25068	2.38423	3.35943	0.246407	-0.346454	0.108015	0.572825	0.299586	0.939545	0.248931	0.136965	0.753491
ENSG00000081386	ZNF510	zinc finger protein 510	22869	32	15	22	26	21	6	1.18953	0.570092	0.823266	1.25333	0.777001	1.08059	0.415191	-0.0315738	0.4019	0.63535	1	0.894663	0.31147	1	0.669897
ENSG00000081479	LRP2	LDL receptor related protein 2	4036	4	0	3	1	0	0	0.0546529	0	0.0412634	0.0177182	0	0
ENSG00000081665	ZNF506	zinc finger protein 506	440515	0	1	2	1	0	0	0	0.0235959	0.0464655	0.0299279	0	0
ENSG00000081692	JMJD4	jumonji domain containing 4	65094	553	608	477	491	568	86	28.2076	31.7082	24.4934	32.4779	28.838	21.2532	0.0834903	0.152785	-0.327169	0.874632	0.600124	0.480461	0.64315	0.391544	0.169076
ENSG00000081721	DUSP12	dual specificity phosphatase 12	11266	221	194	192	120	176	34	27.6063	24.7768	24.1439	19.4385	21.8829	20.5769	-0.514126	-0.102774	-0.231225	0.166641	0.814587	0.775717	0.0235991	0.650309	0.482323
ENSG00000081760	AACS	acetoacetyl-CoA synthetase	65985	280	309	199	223	227	73	3.8424	4.33541	2.74908	3.9684	3.1006	4.85346	0.00121922	-0.113933	0.492427	1	0.777513	0.259059	1	0.598891	0.0480046
ENSG00000081791	DELE1	DAP3 binding cell death enhancer 1	9812	465	472	430	396	559	99	17.0578	17.7027	15.8792	18.8379	20.4107	17.595	0.0349599	0.391363	0.137456	0.973013	0.10119	0.815014	0.844383	0.028451	0.540872
ENSG00000081800	SLC13A1	solute carrier family 13 member 1	6561	0	0	0	0	0	0	0	0	0	0	0	0
ENSG00000081803	CADPS2	calcium dependent secretion activator 2	93664	28	41	29	30	37	9	0.968237	1.44955	1.00951	1.34527	1.27351	1.50782	0.113309	0.274475	0.477365	0.939772	0.641459	0.751638	0.772723	0.435636	0.440721
ENSG00000081818	PCDHB4	protocadherin beta 4	56131	0	0	0	0	0	0	0	0	0	0	0	0
ENSG00000081842	PCDHA6	protocadherin alpha 6	56142	0	0	0	0	0	0	0	0	0	0	0	0
ENSG00000081853	PCDHGA2	protocadherin gamma subfamily A, 2	56113	0	0	0	1	0	0	0	0	0	0.0424736	0	0
ENSG00000081870	IFT25	intraflagellar transport 25	51668	83	63	95	48	86	22	5.64536	4.38107	6.5047	4.23371	5.8222	7.2497	-0.503049	0.19613	0.472193	0.334681	0.659201	0.566526	0.0867219	0.457055	0.235617
ENSG00000081913	PHLPP1	PH domain and leucine rich repeat protein phosphatase 1	23239	214	193	148	140	152	27	5.20402	4.79854	3.62308	4.41488	3.67912	3.18107	-0.162335	-0.184535	-0.433892	0.783581	0.620899	0.545101	0.48716	0.413352	0.214982
ENSG00000081923	ATP8B1	ATPase phospholipid transporting 8B1	5205	77	38	49	61	38	7	2.41147	1.21675	1.54482	2.47734	1.18454	1.06212	0.399517	-0.422177	-0.618286	0.422281	0.385335	0.662213	0.137553	0.199584	0.327612
ENSG00000081985	IL12RB2	interleukin 12 receptor subunit beta 2	3595	0	1	0	0	0	0	0	0.0508782	0	0	0	0
ENSG00000082014	SMARCD3	SWI/SNF related, matrix associated, actin dependent regulator of chromatin, subfamily d, member 3	6604	429	433	438	417	506	98	18.1653	18.7456	18.6703	22.8975	21.3261	20.1046	0.181664	0.319863	0.194987	0.648108	0.199673	0.711108	0.323554	0.0752543	0.38002
ENSG00000082068	WDR70	WD repeat domain 70	55100	124	121	95	81	110	21	3.91796	3.90886	3.02171	3.31886	3.45945	3.21471	-0.245765	0.0545183	-0.0909445	0.663886	0.91749	0.97952	0.344005	0.807924	0.83588
ENSG00000082074	FYB1	FYN binding protein 1	2533	3	0	0	0	0	0	0.0745852	0	0	0	0	0
ENSG00000082126	MPP4	MAGUK p55 scaffold protein 4	58538	0	0	1	0	0	0	0	0	0.0449981	0	0	0
ENSG00000082146	STRADB	STE20 related adaptor beta	55437	153	123	144	98	92	31	10.5998	8.71237	10.0429	8.80434	6.34407	10.4052	-0.274809	-0.506545	0.166752	0.572759	0.120514	0.872971	0.248846	0.0362911	0.629511
ENSG00000082153	BZW1	basic leucine zipper and W2 domains 1	9689	1011	834	1173	915	710	248	27.5228	23.2132	32.1463	32.302	19.2387	32.7098	0.101912	-0.404828	0.320979	0.824047	0.0964438	0.353822	0.549517	0.0265816	0.0896879
ENSG00000082175	PGR	progesterone receptor	5241	0	0	0	0	0	0	0	0	0	0	0	0
ENSG00000082196	C1QTNF3	C1q and TNF related 3	114899	3	1	7	2	7	2	0.184648	0.062929	0.433723	0.159632	0.428843	0.596401	-0.609062	1.00545	1.4282	0.889185	0.490634	0.657859	0.672621	0.28776	0.321615
ENSG00000082212	ME2	malic enzyme 2	4200	218	226	224	219	151	40	3.01831	3.1992	3.12209	3.93203	2.08094	2.68319	0.21297	-0.463844	-0.137142	0.61476	0.111223	0.906885	0.290748	0.0324232	0.693643
ENSG00000082213	C5orf22	chromosome 5 open reading frame 22	55322	109	79	106	133	66	18	5.78654	4.28792	5.66486	9.15609	3.48748	4.62966	0.679693	-0.470612	-0.102244	0.0435792	0.208595	0.980347	0.00250347	0.0802191	0.838639
ENSG00000082258	CCNT2	cyclin T2	905	76	42	58	98	43	23	1.84205	1.04079	1.41516	3.08021	1.03737	2.70085	0.979992	-0.346882	0.991041	0.00514082	0.467087	0.129439	8.59562e-05	0.266711	0.0128488
ENSG00000082269	FAM135A	family with sequence similarity 135 member A	57579	20	15	22	30	8	7	0.415716	0.318775	0.460341	0.808638	0.165513	0.704935	0.89299	-1.13857	0.895053	0.154571	0.171323	0.526936	0.0207643	0.0601291	0.199119
ENSG00000082293	COL19A1	collagen type XIX alpha 1 chain	1310	0	0	0	0	0	0	0	0	0	0	0	0
ENSG00000082397	EPB41L3	erythrocyte membrane protein band 4.1 like 3	23136	1	0	0	0	0	0	0.0180366	0	0	0	0	0
ENSG00000082438	COBLL1	cordon-bleu WH2 repeat protein like 1	22837	27	11	18	33	20	7	0.34595	0.144102	0.232173	0.548314	0.255067	0.434542	1.0571	0.197735	0.922109	0.0555335	0.847863	0.526936	0.00357239	0.697959	0.199119
ENSG00000082458	DLG3	discs large MAGUK scaffold protein 3	1741	569	511	520	415	654	105	15.9133	14.6115	14.64	15.0509	18.2054	14.2272	-0.122979	0.392228	-0.00320019	0.811005	0.0952511	1	0.52848	0.0261289	1
ENSG00000082482	KCNK2	potassium two pore domain channel subfamily K member 2	3776	1	1	0	0	0	0	0.0562918	0.0575535	0	0	0	0
ENSG00000082497	SERTAD4	SERTA domain containing 4	56256	3	4	2	1	1	1	0.120714	0.164559	0.0810131	0.0521796	0.0400507	0.194948
ENSG00000082512	TRAF5	TNF receptor associated factor 5	7188	31	26	31	24	36	8	0.756277	0.648514	0.761327	0.75927	0.874173	0.945569	-0.0507447	0.391645	0.464479	1	0.436721	0.7738	0.981478	0.241903	0.477191
ENSG00000082515	MRPL22	mitochondrial ribosomal protein L22	29093	291	288	293	187	285	47	12.1674	12.3119	12.3329	10.1394	11.8611	9.52112	-0.398635	0.0681956	-0.288443	0.265912	0.861869	0.645188	0.0548343	0.718224	0.30613
ENSG00000082516	GEMIN5	gem nuclear organelle associated protein 5	25929	883	830	603	708	391	171	34.4347	33.0933	23.6724	35.8042	15.177	32.3084	0.114733	-0.882487	0.167498	0.795995	0.000124761	0.726873	0.506151	4.40874e-06	0.39897
ENSG00000082556	OPRK1	opioid receptor kappa 1	4986	0	0	0	0	0	0	0	0	0	0	0	0
ENSG00000082641	NFE2L1	NFE2 like bZIP transcription factor 1	4779	3781	3694	3115	3893	2574	648	141.459	141.301	117.32	188.875	95.8533	117.458	0.379542	-0.35816	-0.104726	0.155262	0.130096	0.833044	0.0209194	0.0404568	0.570501
ENSG00000082684	SEMA5B	semaphorin 5B	54437	0	0	0	1	1	0	0	0	0	0.0335121	0.0257224	0
ENSG00000082701	GSK3B	glycogen synthase kinase 3 beta	2932	378	353	312	338	227	61	10.2009	9.73971	8.47598	11.8284	6.09742	7.97551	0.198089	-0.516805	-0.169372	0.614105	0.0512591	0.808787	0.29011	0.010697	0.531875
ENSG00000082781	ITGB5	integrin subunit beta 5	3693	686	843	711	855	811	163	23.1756	29.118	24.1806	37.4576	27.2712	26.6796	0.429971	0.212921	0.141486	0.116649	0.408641	0.775292	0.0128448	0.218979	0.481756
ENSG00000082805	ERC1	ELKS/RAB6-interacting/CAST family member 1	23085	618	504	416	538	342	122	10.0877	8.41125	6.83576	11.3881	5.55654	9.64822	0.310934	-0.48332	0.272736	0.325347	0.0570788	0.528634	0.0813477	0.0124338	0.200539
ENSG00000082898	XPO1	exportin 1	7514	929	675	924	924	575	247	17.3562	12.8935	17.3781	22.3861	10.6926	22.3574	0.373828	-0.451231	0.57294	0.190642	0.0644565	0.0519583	0.0296724	0.0147796	0.0025823
ENSG00000082929	LINC01587	long intergenic non-protein coding RNA 1587	10141	0	0	0	0	0	0	0	0	0	0	0	0
ENSG00000082996	RNF13	ring finger protein 13	11342	81	49	74	101	52	15	4.90459	3.03347	4.51066	7.93058	3.13398	4.40041	0.810171	-0.28668	0.162214	0.0227444	0.560423	0.917018	0.000876824	0.352351	0.710092
ENSG00000083067	TRPM3	transient receptor potential cation channel subfamily M member 3	80036	0	0	1	0	0	0	0	0	0.0111275	0	0	0
ENSG00000083093	PALB2	partner and localizer of BRCA2	79728	100	55	75	72	43	13	4.63663	2.60731	3.5007	4.32914	1.98448	2.92032	0.151096	-0.731595	-0.215139	0.84622	0.0670102	0.900107	0.587266	0.0157387	0.677154
ENSG00000083097	DOP1A	DOP1 leucine zipper like protein A	23033	31	22	34	26	21	3	0.679256	0.492857	0.749966	0.738773	0.458001	0.318476	0.0809519	-0.36585	-0.924634	0.9976	0.610743	0.713172	0.903495	0.403409	0.383979
ENSG00000083099	LYRM2	LYR motif containing 2	57226	206	143	190	157	240	36	5.22661	3.7095	4.85285	5.16557	6.06093	4.42526	0.0462904	0.517426	0.024138	0.959896	0.0449674	1	0.817507	0.00890104	0.941453
ENSG00000083123	BCKDHB	branched chain keto acid dehydrogenase E1 subunit beta	594	28	20	30	17	8	3	1.51384	1.10555	1.6328	1.19189	0.430513	0.785826	-0.372035	-1.58825	-0.768013	0.711294	0.0207714	0.7738	0.395018	0.00306367	0.47377
ENSG00000083168	KAT6A	lysine acetyltransferase 6A	7994	297	233	249	358	278	72	2.70762	2.17177	2.28518	4.23233	2.52262	3.18015	0.703528	0.197983	0.492196	0.00788327	0.512015	0.256569	0.000159561	0.305841	0.0467286
ENSG00000083223	TUT7	terminal uridylyl transferase 7	79670	87	71	97	85	89	22	2.85505	2.3822	3.20447	3.61725	2.90709	3.49784	0.238316	0.163904	0.390595	0.655268	0.733842	0.660288	0.332696	0.54408	0.326042
ENSG00000083290	ULK2	unc-51 like autophagy activating kinase 2	9706	27	17	38	40	43	9	0.602222	0.387676	0.853231	1.15696	0.954634	0.972567	0.785125	0.748766	0.735237	0.134163	0.0837859	0.527955	0.0163021	0.0215929	0.200073
ENSG00000083307	GRHL2	grainyhead like transcription factor 2	79977	153	132	149	124	109	40	5.56343	4.9074	5.45416	5.84708	3.94506	7.04686	0.0164282	-0.310124	0.48626	1	0.379784	0.389721	0.958844	0.195905	0.107971
ENSG00000083312	TNPO1	transportin 1	3842	441	357	367	430	277	103	8.10424	6.70762	6.78938	10.2473	5.06675	9.17055	0.387354	-0.387696	0.428157	0.205483	0.154251	0.281709	0.034055	0.0519425	0.0566376
ENSG00000083444	PLOD1	procollagen-lysine,2-oxoglutarate 5-dioxygenase 1	5351	3600	3660	3249	2334	3554	532	148.941	154.817	135.316	125.221	146.354	106.637	-0.348393	0.117368	-0.379164	0.244379	0.675367	0.233147	0.046476	0.473698	0.038582
ENSG00000083454	P2RX5	purinergic receptor P2X 5	5026	128	113	87	81	124	12	6.99775	6.31616	4.78804	5.74248	6.74754	3.17844	-0.192897	0.280049	-0.843857	0.775912	0.413057	0.287627	0.473381	0.222725	0.0597158
ENSG00000083457	ITGAE	integrin subunit alpha E	3682	135	166	187	99	204	42	4.5007	5.65824	6.27593	4.28004	6.76943	6.78391	-0.480986	0.420485	0.383728	0.230771	0.13064	0.511403	0.0418225	0.0406931	0.189188
ENSG00000083520	DIS3	DIS3 homolog, exosome endoribonuclease and 3'-5' exoribonuclease	22894	217	150	222	212	116	82	4.40811	3.11538	4.5398	5.58464	2.34545	8.07032	0.351064	-0.658986	1.08283	0.327336	0.0224598	0.00126214	0.082326	0.00342374	1.2805e-05
ENSG00000083535	PIBF1	progesterone immunomodulatory binding factor 1	10464	26	14	11	34	8	4	1.36938	0.753884	0.58322	2.32217	0.419387	1.02069	1.23382	-0.977665	0.253087	0.0197916	0.286435	0.954581	0.00070467	0.128599	0.78745
ENSG00000083544	TDRD3	tudor domain containing 3	81550	44	32	44	40	53	13	1.24961	0.929174	1.25795	1.47315	1.49821	1.78874	0.238395	0.502893	0.717941	0.779097	0.219561	0.475383	0.480053	0.0865341	0.16297
ENSG00000083622				0	0	0	0	0	0	0	0	0	0	0	0
ENSG00000083635	NUFIP1	nuclear FMR1 interacting protein 1	26747	115	161	130	96	92	28	7.27345	10.4111	8.27707	7.87372	5.7917	8.57995	-0.26052	-0.462542	0.0640579	0.609481	0.159289	0.995611	0.284191	0.0544158	0.879566
ENSG00000083642	PDS5B	PDS5 cohesin associated factor B	23047	79	82	45	54	52	9	1.31857	1.39932	0.756099	1.16879	0.863883	0.727784	-0.107897	-0.302791	-0.588883	0.918031	0.533306	0.644145	0.7305	0.325363	0.305334
ENSG00000083720	OXCT1	3-oxoacid CoA-transferase 1	5019	235	187	229	202	201	59	12.6155	10.2638	12.3755	14.0623	10.7401	15.3453	0.13622	-0.011714	0.462975	0.798593	1	0.34379	0.509456	0.979898	0.0840875
ENSG00000083750	RRAGB	Ras related GTP binding B	10325	43	34	25	24	31	6	3.47315	2.80777	2.03276	2.51381	2.49226	2.34796	-0.261841	-0.0344344	-0.159631	0.797259	1	0.999695	0.507647	1	0.888925
ENSG00000083782	EPYC	epiphycan	1833	0	0	0	0	0	0	0	0	0	0	0	0
ENSG00000083799	CYLD	CYLD lysine 63 deubiquitinase	1540	40	43	41	35	45	7	0.679639	0.746987	0.701281	0.771173	0.761038	0.576236	-0.00234262	0.218738	-0.220845	1	0.714274	0.954279	1	0.517932	0.785508
ENSG00000083807	SLC27A5	solute carrier family 27 member 5	10998	489	474	476	310	607	74	13.4118	13.2917	13.1424	11.0257	16.5707	9.83315	-0.39187	0.436478	-0.356	0.240871	0.0607721	0.454543	0.0452291	0.0136118	0.149723
ENSG00000083812	ZNF324	zinc finger protein 324	25799	207	188	164	175	149	33	8.04395	7.46936	6.41554	8.81866	5.76316	6.21293	0.148518	-0.22412	-0.155532	0.774899	0.528081	0.891249	0.472445	0.320482	0.66003
ENSG00000083814	ZNF671	zinc finger protein 671	79891	0	0	2	0	0	0	0	0	0.125465	0	0	0
ENSG00000083817	ZNF416	zinc finger protein 416	55659	110	90	86	78	56	17	9.51321	7.95799	7.48726	8.74772	4.82056	7.12307	-0.0497354	-0.667577	-0.144962	0.984919	0.0612392	0.97952	0.876229	0.0137655	0.834804
ENSG00000083828	ZNF586	zinc finger protein 586	54807	29	25	24	19	15	9	1.16477	1.02662	0.970383	0.989603	0.599664	1.75133	-0.212705	-0.691404	0.806964	0.918031	0.297367	0.508886	0.73012	0.135513	0.187496
ENSG00000083838	ZNF446	zinc finger protein 446	55663	183	148	114	124	172	28	8.44767	6.98512	5.29762	7.42289	7.90296	6.26221	-0.0176362	0.313316	-0.0618951	1	0.2916	1	0.96607	0.13173	0.917107
ENSG00000083844	ZNF264	zinc finger protein 264	9422	196	201	199	203	179	67	3.44237	3.60931	3.5184	4.62342	3.12918	5.70112	0.26819	-0.0539941	0.771164	0.498774	0.927135	0.0548295	0.187782	0.823088	0.00281656
ENSG00000083845	RPS5	ribosomal protein S5	6193	32297	29286	30387	23984	28684	5769	1965.33	1822.05	1861.45	1892.61	1737.36	1700.82	-0.115378	0.00193676	-0.0685261	0.794928	1	0.909287	0.504994	0.975509	0.698763
ENSG00000083857	FAT1	FAT atypical cadherin 1	2195	9016	7771	5502	8864	2763	2449	122.746	108.167	75.4056	156.491	37.4411	161.535	0.496251	-1.32629	0.743012	0.0406751	1.20987e-10	0.000604587	0.0022389	4.76836e-13	5.12909e-06
ENSG00000083896	YTHDC1	YTH N6-methyladenosine RNA binding protein C1	91746	359	307	282	282	203	83	11.2367	9.82445	8.88551	11.4461	6.32433	12.5865	0.0757268	-0.539054	0.413598	0.897284	0.0450473	0.34379	0.688806	0.00892521	0.0845479
ENSG00000083937	CHMP2B	charged multivesicular body protein 2B	25978	163	112	186	111	191	33	11.521	8.09372	13.2345	10.174	13.4373	11.3006	-0.229158	0.412489	0.123021	0.656229	0.145887	0.915687	0.33471	0.0474588	0.708195
ENSG00000084070	SMAP2	small ArfGAP2	64744	396	367	322	369	252	57	24.2044	22.9346	19.8128	29.2477	15.3312	16.8794	0.26786	-0.422935	-0.32395	0.438561	0.115041	0.555255	0.147738	0.0340589	0.222697
ENSG00000084072	PPIE	peptidylprolyl isomerase E	10450	1269	1379	1255	867	1548	245	34.6064	38.449	34.4531	30.6605	42.0186	32.3702	-0.349308	0.346066	-0.0700575	0.259577	0.128206	0.933596	0.0525788	0.0397463	0.739331
ENSG00000084073	ZMPSTE24	zinc metallopeptidase STE24	10269	208	230	314	249	176	72	13.3123	15.0503	20.2306	20.6659	11.2119	22.3258	0.225397	-0.41568	0.53768	0.57757	0.146418	0.215863	0.253254	0.0478376	0.0329743
ENSG00000084090	STARD7	StAR related lipid transfer domain containing 7	56910	2327	2138	2391	1759	2173	533	116.034	108.999	120.022	113.742	107.851	128.766	-0.139522	0.0245424	0.240438	0.742744	0.95511	0.481482	0.431109	0.871814	0.170111
ENSG00000084092	NOA1	nitric oxide associated 1	84273	558	550	457	421	416	89	55.3726	55.802	45.6528	54.1762	41.0893	42.7892	-0.0710414	-0.229094	-0.210404	0.918031	0.426178	0.710548	0.730067	0.23319	0.378105
ENSG00000084093	REST	RE1 silencing transcription factor	5978	103	64	93	145	64	47	2.83984	1.80411	2.58124	5.1843	1.75635	6.27824	0.982283	-0.336858	1.45891	0.00111099	0.394786	0.000253556	1.02416e-05	0.208073	1.79539e-06
ENSG00000084110	HAL	histidine ammonia-lyase	3034	2	3	4	0	6	3	0.0855426	0.13119	0.172228	0	0.255434	0.621667	-4.59042	1.06558	2.282	0.450998	0.511024	0.270572	0.154667	0.304805	0.0525058
ENSG00000084112	SSH1	slingshot protein phosphatase 1	54434	563	477	425	742	419	152	8.52365	7.3835	6.47734	14.5676	6.31403	11.1492	0.843811	-0.121314	0.658994	0.000183209	0.728165	0.0368173	1.02803e-06	0.536079	0.00151745
ENSG00000084207	GSTP1	glutathione S-transferase pi 1	2950	11957	12787	12279	9345	13906	2384	1377.16	1505.76	1423.69	1395.75	1594.19	1330.31	-0.165101	0.267477	-0.0333816	0.65939	0.244224	0.990302	0.338875	0.100789	0.860005
ENSG00000084234	APLP2	amyloid beta precursor like protein 2	334	2267	2198	1880	1695	1353	317	66.859	66.277	55.8157	64.8252	39.7175	45.2952	-0.0809491	-0.546896	-0.39712	0.882344	0.015703	0.22972	0.654166	0.00215667	0.0372278
ENSG00000084444	FAM234B	family with sequence similarity 234 member B	57613	211	204	241	175	208	43	6.92121	6.84158	7.95805	7.44395	6.79107	6.83364	-0.0840074	0.0242972	-0.00646937	0.908522	0.969817	1	0.709546	0.89674	1
ENSG00000084453	SLCO1A2	solute carrier organic anion transporter family member 1A2	6579	0	0	0	0	0	0	0	0	0	0	0	0
ENSG00000084463	WBP11	WW domain binding protein 11	51729	1383	1284	1030	1080	670	212	57.8927	54.9532	43.4039	58.6261	27.9159	42.9953	0.0491062	-0.780439	-0.197226	0.936561	0.000510488	0.664342	0.765264	2.47231e-05	0.32902
ENSG00000084623	EIF3I	eukaryotic translation initiation factor 3 subunit I	8668	8755	8613	7884	6095	7425	1503	1117.09	1123.61	1012.67	1008.49	942.985	929.129	-0.227895	-0.0839914	-0.145146	0.498144	0.801531	0.732576	0.187088	0.632551	0.411368
ENSG00000084628	NKAIN1	sodium/potassium transporting ATPase interacting 1	79570	43	45	35	25	33	6	2.85071	3.05016	2.33584	2.14926	2.17758	1.92717	-0.473901	-0.215281	-0.43013	0.553469	0.775024	0.847917	0.233108	0.594579	0.593861
ENSG00000084636	COL16A1	collagen type XVI alpha 1 chain	1307	29	30	25	14	34	4	0.689823	0.729604	0.598646	0.43185	0.804996	0.460981	-0.75731	0.37581	-0.463706	0.344784	0.489055	0.926303	0.0921028	0.286246	0.72592
ENSG00000084652	TXLNA	taxilin alpha	200081	975	871	778	815	739	188	41.9629	38.3271	33.7079	45.4867	31.6578	39.2015	0.137698	-0.144344	0.12416	0.735049	0.637409	0.803014	0.424177	0.431296	0.524239
ENSG00000084674	APOB	apolipoprotein B	338	2	11	0	5	7	3	0.0296872	0.166939	0	0.0962444	0.103422	0.215747	0.432404	0.770733	1.77278	0.888817	0.642852	0.479857	0.669017	0.437929	0.167243
ENSG00000084676	NCOA1	nuclear receptor coactivator 1	8648	82	87	102	82	79	15	2.09062	2.26781	2.61789	2.71107	2.00476	1.85283	0.0970732	-0.0972804	-0.250449	0.898438	0.870349	0.869054	0.690509	0.732093	0.622909
ENSG00000084693	AGBL5	AGBL carboxypeptidase 5	60509	819	731	607	753	471	109	34.1213	31.1376	25.4578	40.682	19.5316	22.0015	0.306563	-0.51106	-0.379083	0.318224	0.036107	0.352449	0.0779485	0.00658697	0.0890711
ENSG00000084710	EFR3B	EFR3 homolog B	22979	49	22	26	16	14	5	1.01334	0.465165	0.54128	0.429085	0.288178	0.50097	-0.769208	-1.10029	-0.346943	0.341753	0.0581047	0.937505	0.0906547	0.0127427	0.749754
ENSG00000084731	KIF3C	kinesin family member 3C	3797	186	213	153	156	106	20	6.39569	7.48825	5.2961	6.95608	3.6279	3.33187	-0.00138051	-0.699101	-0.861324	1	0.0176477	0.155601	0.994654	0.00248978	0.0176909
ENSG00000084733	RAB10	RAB10, member RAS oncogene family	10890	591	477	589	500	413	120	35.5993	29.3764	35.7157	39.0561	24.7616	35.0202	0.0960616	-0.320479	0.139683	0.851553	0.231117	0.792638	0.595347	0.0934194	0.504916
ENSG00000084734	GCKR	glucokinase regulator	2646	0	0	0	0	0	0	0	0	0	0	0	0
ENSG00000084754	HADHA	hydroxyacyl-CoA dehydrogenase trifunctional multienzyme complex subunit alpha	3030	2527	2643	2223	1783	2422	438	128.422	137.328	113.727	117.504	122.513	107.843	-0.229777	0.0712398	-0.152553	0.503108	0.822983	0.735255	0.191531	0.66169	0.416226
ENSG00000084764	MAPRE3	microtubule associated protein RP/EB family member 3	22924	170	194	192	170	162	35	10.3134	12.0333	11.7259	13.3743	9.7824	10.2874	0.11133	-0.0989248	-0.0661151	0.853144	0.817871	1	0.599436	0.653969	0.890742
ENSG00000084774	CAD	carbamoyl-phosphate synthetase 2, aspartate transcarbamylase, and dihydroorotase	790	3896	3735	2689	4048	1878	527	101.565	99.5503	70.5678	136.846	48.73	66.561	0.474165	-0.774652	-0.364604	0.0576676	0.000329474	0.256665	0.00379443	1.46305e-05	0.0467808
ENSG00000085063	CD59	CD59 molecule (CD59 blood group)	966	1018	1002	1155	858	1200	279	21.2	21.3345	24.2137	23.1708	24.874	28.1499	-0.0658953	0.277192	0.415862	0.91687	0.247674	0.192175	0.727441	0.103196	0.0263758
ENSG00000085117	CD82	CD82 molecule	3732	197	162	164	109	140	20	10.7353	9.02588	8.99668	7.70266	7.59367	5.28034	-0.437281	-0.217251	-0.780457	0.275285	0.541825	0.210724	0.0591578	0.334252	0.0314055
ENSG00000085185	BCORL1	BCL6 corepressor like 1	63035	784	710	542	619	427	101	21.5807	19.9818	15.0189	22.0956	11.6991	13.4696	0.107257	-0.569155	-0.405669	0.817232	0.0189522	0.319887	0.539688	0.00273459	0.0738496
ENSG00000085224	ATRX	ATRX chromatin remodeler	546	115	45	63	123	38	50	1.3138	0.525617	0.724538	1.82222	0.432105	2.76748	0.970067	-0.862112	1.77303	0.00244414	0.0261513	1.83426e-06	3.13477e-05	0.00420832	8.08694e-09
ENSG00000085231	AK6	adenylate kinase 6	102157402	55	61	91	60	85	16	5.6568	6.41453	9.42193	8.00249	8.70167	7.97283	0.0345613	0.395631	0.229785	1	0.279665	0.877909	0.917806	0.124308	0.64013
ENSG00000085265	FCN1	ficolin 1	2219	0	0	0	0	0	0	0	0	0	0	0	0
ENSG00000085274	MYNN	myoneurin	55892	54	38	52	53	54	15	2.07425	1.49237	2.01076	2.64003	2.0646	2.79153	0.381487	0.267856	0.662166	0.494873	0.554196	0.448021	0.184462	0.345845	0.146258
ENSG00000085276	MECOM	MDS1 and EVI1 complex locus	2122	21	13	17	19	8	2	0.499149	0.315923	0.406771	0.58564	0.189268	0.230317	0.397022	-0.9786	-0.736842	0.747952	0.286435	0.908568	0.437843	0.128599	0.697419
ENSG00000085365	SCAMP1	secretory carrier membrane protein 1	9522	71	47	52	78	43	16	2.31651	1.56783	1.70793	3.30017	1.39643	2.52918	0.700242	-0.297738	0.517444	0.0857584	0.543983	0.582587	0.00760196	0.336723	0.24973
ENSG00000085377	PREP	prolyl endopeptidase	5550	758	691	712	531	437	135	18.7099	17.4384	17.6919	16.9967	10.7364	16.1444	-0.201277	-0.623115	-0.0745205	0.605089	0.00864972	0.937468	0.278599	0.0009892	0.749147
ENSG00000085382	HACE1	HECT domain and ankyrin repeat containing E3 ubiquitin protein ligase 1	57531	24	14	17	22	16	3	0.571877	0.341072	0.407784	0.679798	0.379478	0.346335	0.499587	-0.0970146	-0.266852	0.526676	1	1	0.210575	0.972575	0.900611
ENSG00000085415	SEH1L	SEH1 like nucleoporin	81929	382	322	460	356	361	125	8.022	6.91356	9.7245	9.69472	7.54574	12.7178	0.114049	-0.00664912	0.706443	0.811693	1	0.0308389	0.530433	1	0.00114974
ENSG00000085433	WDR47	WD repeat domain 47	22911	38	48	46	48	23	14	1.89099	2.44215	2.30438	3.09751	1.13922	3.37534	0.361273	-0.836768	0.685203	0.565621	0.0788863	0.484722	0.242786	0.0198138	0.172227
ENSG00000085449	WDFY1	WD repeat and FYVE domain containing 1	57590	111	72	89	98	50	30	4.45419	2.95396	3.59522	5.09961	1.99706	5.83245	0.352838	-0.757026	0.746993	0.437224	0.0381511	0.217951	0.146968	0.00705864	0.0334425
ENSG00000085465	OVGP1	oviductal glycoprotein 1	5016	21	21	20	8	26	2	1.83418	1.87529	1.7585	0.906102	2.26032	0.846322	-1.12044	0.426189	-1.01737	0.209751	0.522954	0.767188	0.0352528	0.315449	0.460005
ENSG00000085491	SLC25A24	solute carrier family 25 member 24	29957	63	34	63	68	38	27	2.06161	1.13755	2.07537	2.88563	1.23773	4.28068	0.589768	-0.388381	1.35832	0.196873	0.427598	0.013998	0.0315593	0.234422	0.000351307
ENSG00000085511	MAP3K4	mitogen-activated protein kinase kinase kinase 4	4216	180	162	158	155	200	69	5.26697	4.84652	4.6541	5.88147	5.82498	9.78187	0.134069	0.360798	1.06839	0.812698	0.204587	0.00297879	0.532515	0.0780218	3.88019e-05
ENSG00000085514	PILRA	paired immunoglobin like type 2 receptor alpha	29992	5	3	2	1	4	0	0.553018	0.339248	0.222684	0.143428	0.440356	0
ENSG00000085552	IGSF9	immunoglobulin superfamily member 9	57549	381	320	327	192	241	30	12.635	10.8499	10.9166	8.2569	7.95505	4.82009	-0.595578	-0.408614	-1.17057	0.0618123	0.137683	0.00630963	0.00422404	0.0437882	0.000106214
ENSG00000085563	ABCB1	ATP binding cassette subfamily B member 1	5243	14	13	9	11	11	1	0.530729	0.503866	0.343461	0.540759	0.415062	0.183666	0.111795	-0.0276035	-1.21876	1	1	0.775049	0.973314	1	0.481337
ENSG00000085644	ZNF213	zinc finger protein 213	7760	283	273	204	308	200	47	9.66914	9.53653	7.01652	13.6464	6.80153	7.78006	0.520569	-0.242863	-0.0888165	0.0772511	0.451482	0.954931	0.00619688	0.25403	0.787866
ENSG00000085662	AKR1B1	aldo-keto reductase family 1 member B	231	1199	1249	1188	971	1589	275	72.2225	76.9206	72.0378	75.847	95.2693	80.2546	-0.0831172	0.486548	0.199341	0.881663	0.0238788	0.621544	0.653114	0.00370962	0.284989
ENSG00000085719	CPNE3	copine 3	8895	597	428	613	577	368	140	19.5043	14.2964	20.1607	24.4454	11.9668	22.1599	0.320354	-0.469172	0.379714	0.301444	0.0627981	0.308122	0.0706793	0.014241	0.0688873
ENSG00000085721	RRN3	RRN3 homolog, RNA polymerase I transcription factor	54700	452	429	471	423	252	118	23.9378	23.229	25.1106	29.0504	13.2838	30.277	0.146285	-0.741494	0.406862	0.734991	0.00270133	0.296917	0.423368	0.000215457	0.0627066
ENSG00000085733	CTTN	cortactin	2017	1158	1299	1276	1172	1666	265	36.6782	42.0664	40.6856	48.1386	52.5231	40.6658	0.148935	0.515463	0.10656	0.697686	0.0150986	0.832054	0.379556	0.00206056	0.567459
ENSG00000085741	WNT11	Wnt family member 11	7481	32	26	34	15	20	4	2.97057	2.46769	3.17731	1.80571	1.84797	1.79901	-0.788707	-0.516407	-0.59377	0.295764	0.409459	0.800937	0.0684786	0.21991	0.517944
ENSG00000085760	MTIF2	mitochondrial translational initiation factor 2	4528	287	215	268	230	261	65	18.7223	14.3398	17.5996	19.4568	16.947	20.5435	0.0821499	0.123689	0.361404	0.891951	0.72151	0.46957	0.676441	0.528144	0.158249
ENSG00000085788	DDHD2	DDHD domain containing 2	23259	181	170	174	170	105	55	3.77686	3.62683	3.65503	4.60009	2.1808	5.5603	0.196244	-0.63904	0.670401	0.672356	0.0339495	0.139547	0.353084	0.00602791	0.0143268
ENSG00000085831	TTC39A	tetratricopeptide repeat domain 39A	22996	148	125	153	111	156	34	3.47949	3.00462	3.62106	3.38409	3.65051	3.87272	-0.116433	0.23339	0.278755	0.877555	0.474113	0.711835	0.647175	0.272881	0.381269
ENSG00000085832	EPS15	epidermal growth factor receptor pathway substrate 15	2060	122	93	123	140	118	39	3.63951	2.83657	3.69385	5.41598	3.50381	5.63679	0.552332	0.165186	0.810651	0.114198	0.677718	0.108071	0.0124802	0.476168	0.00923332
ENSG00000085840	ORC1	origin recognition complex subunit 1	4998	518	547	453	465	396	109	36.5307	39.4405	32.1601	42.5253	27.7971	37.2425	0.115225	-0.257265	0.124845	0.805069	0.361185	0.833044	0.519846	0.18159	0.570303
ENSG00000085871	MGST2	microsomal glutathione S-transferase 2	4258	234	203	203	122	173	30	16.237	14.4016	14.18	10.9778	11.9484	10.0854	-0.566496	-0.203756	-0.487809	0.107854	0.554328	0.441449	0.0113329	0.34615	0.141637
ENSG00000085872	CHERP	calcium homeostasis endoplasmic reticulum protein	10523	1340	1310	1244	1100	1030	191	49.0333	49.0099	45.8244	52.1969	37.5145	33.8613	-0.000972089	-0.236665	-0.424241	1	0.367527	0.224857	0.992058	0.186955	0.0358029
ENSG00000085978	ATG16L1	autophagy related 16 like 1	55054	373	307	321	298	310	78	13.5766	11.4248	11.7619	14.0658	11.231	13.755	0.0769099	-0.00696109	0.245598	0.896166	1	0.643255	0.684963	0.997027	0.304698
ENSG00000085982	USP40	ubiquitin specific peptidase 40	55230	313	278	303	263	319	70	7.36651	6.68943	7.17878	8.02674	7.47281	7.98178	0.05845	0.196032	0.251249	0.937328	0.508403	0.648892	0.76896	0.302427	0.310635
ENSG00000085998	POMGNT1	protein O-linked mannose N-acetylglucosaminyltransferase 1 (beta 1,2-)	55624	1870	1972	1683	1789	1855	358	66.5033	71.7026	60.2526	82.5045	65.663	61.6834	0.195039	0.106452	-0.0235368	0.566637	0.716393	1	0.243574	0.521	0.918971
ENSG00000085999	RAD54L	RAD54 like	8438	383	353	331	332	373	66	20.6716	19.4794	17.9843	23.2369	20.0382	17.2585	0.139421	0.166547	-0.0886048	0.765391	0.578379	0.944603	0.460886	0.369205	0.762613
ENSG00000086015	MAST2	microtubule associated serine/threonine kinase 2	23139	1329	1212	987	1183	862	179	37.1399	34.6294	27.7667	42.8713	23.9772	24.2356	0.248266	-0.349215	-0.373539	0.432948	0.156221	0.307467	0.143911	0.0530231	0.0686615
ENSG00000086061	DNAJA1	DnaJ heat shock protein family (Hsp40) member A1	3301	2434	2498	2499	1907	2272	553	200.797	210.695	207.536	204.011	186.561	221.027	-0.140581	-0.0287882	0.175978	0.737281	0.961455	0.651105	0.426412	0.883126	0.312809
ENSG00000086062	B4GALT1	beta-1,4-galactosyltransferase 1	2683	593	578	554	596	505	120	26.6313	26.5394	25.0459	34.7096	22.5738	26.1097	0.289554	-0.0902543	0.0798449	0.365677	0.807176	0.91203	0.103296	0.640403	0.702696
ENSG00000086065	CHMP5	charged multivesicular body protein 5	51510	157	154	176	104	120	37	14.4525	14.494	16.3097	12.4149	10.9951	16.5017	-0.404646	-0.339128	0.20634	0.324704	0.297468	0.797529	0.0809266	0.135579	0.513685
ENSG00000086102	NFX1	nuclear transcription factor, X-box binding 1	4799	442	389	402	409	427	104	13.6139	12.25	12.4645	16.3361	13.0907	15.5195	0.232025	0.153325	0.358986	0.523741	0.606598	0.389721	0.206942	0.399415	0.107988
ENSG00000086159	AQP6	aquaporin 6	363	0	0	1	0	0	2	0	0	0.0431996	0	0	0.415818
ENSG00000086189	DIMT1	DIM1 rRNA methyltransferase and ribosome maturation factor	27292	167	120	148	118	93	23	5.96606	4.38307	5.32259	5.46662	3.30696	3.98091	-0.0566322	-0.540451	-0.312856	0.979769	0.0893239	0.728444	0.863206	0.0238257	0.404994
ENSG00000086200	IPO11	importin 11	51194	176	147	175	139	251	48	5.13764	4.38727	5.14256	5.26176	7.29289	6.78853	-0.0170313	0.694277	0.551076	1	0.0048297	0.270339	0.970305	0.000462645	0.0517978
ENSG00000086205	FOLH1	folate hydrolase 1	2346	0	0	0	0	0	0	0	0	0	0	0	0
ENSG00000086232	EIF2AK1	eukaryotic translation initiation factor 2 alpha kinase 1	27102	2197	2020	2056	1701	2103	403	88.0484	82.7693	82.9478	88.4019	83.8892	78.2493	-0.0592305	0.105967	-0.0342319	0.92716	0.716403	0.993159	0.747426	0.521236	0.871353
ENSG00000086288	NME8	NME/NM23 family member 8	51314	0	0	0	0	0	0	0	0	0	0	0	0
ENSG00000086289	EPDR1	ependymin related 1	54749	176	170	206	176	159	49	13.9345	13.7611	16.4185	18.0699	12.53	18.7956	0.17305	-0.11416	0.430658	0.716991	0.786592	0.421062	0.404478	0.61309	0.127068
ENSG00000086300	SNX10	sorting nexin 10	29887	53	28	42	50	35	12	3.3159	1.79106	2.64524	4.0566	2.17956	3.6374	0.52565	-0.127968	0.568892	0.321481	0.913993	0.575819	0.0793718	0.801468	0.243482
ENSG00000086475	SEPHS1	selenophosphate synthetase 1	22929	593	577	571	450	589	132	33.6045	33.4307	32.5739	33.069	33.2226	36.241	-0.129169	0.11826	0.203894	0.795242	0.70536	0.666049	0.505459	0.505814	0.331056
ENSG00000086504	MRPL28	mitochondrial ribosomal protein L28	10573	1444	1547	1456	984	1446	226	104.103	114.028	105.669	91.9933	103.762	78.9383	-0.354844	0.0595949	-0.374638	0.24715	0.860874	0.28513	0.0477288	0.716935	0.0585537
ENSG00000086506	HBQ1	hemoglobin subunit theta 1	3049	0	0	0	0	0	0	0	0	0	0	0	0
ENSG00000086544	ITPKC	inositol-trisphosphate 3-kinase C	80271	290	281	284	282	285	64	18.9068	18.7306	18.6392	23.8416	18.4944	20.2155	0.222445	0.096905	0.185423	0.564017	0.784298	0.7738	0.241584	0.609469	0.471191
ENSG00000086548	CEACAM6	CEA cell adhesion molecule 6	4680	4	1	12	7	1	2	0.297836	0.076128	0.899475	0.675898	0.0741128	0.721492	0.532886	-2.27522	0.821068	0.778002	0.217618	0.7738	0.478363	0.0851829	0.476806
ENSG00000086570	FAT2	FAT atypical cadherin 2	2196	17	12	15	14	4	1	0.257393	0.185761	0.228628	0.274879	0.0602813	0.0733553	0.170269	-1.74676	-1.50458	0.931988	0.0537623	0.728444	0.755762	0.0113959	0.405875
ENSG00000086589	RBM22	RNA binding motif protein 22	55696	1032	942	970	835	781	185	63.3243	59.0974	59.9174	66.442	47.6999	54.9979	0.00566242	-0.231617	-0.0660459	1	0.390616	0.944603	0.962645	0.20479	0.765871
ENSG00000086598	TMED2	transmembrane p24 trafficking protein 2	10959	1946	1637	2217	1329	1150	385	111.744	96.1078	128.156	98.9633	65.7289	107.109	-0.302108	-0.651643	0.0129885	0.337821	0.00336469	1	0.0883931	0.000289494	0.930036
ENSG00000086619	ERO1B	endoplasmic reticulum oxidoreductase 1 beta	56605	11	16	19	10	17	3	0.418298	0.622071	0.72734	0.493128	0.643455	0.552712	-0.375866	0.243317	-0.013801	0.806541	0.791505	1	0.523255	0.620059	1
ENSG00000086666	ZFAND6	zinc finger AN1-type containing 6	54469	88	82	99	62	49	26	3.75876	3.58098	4.25684	3.43415	2.08321	5.38046	-0.293964	-0.773331	0.553537	0.63452	0.0342993	0.429885	0.310012	0.00610606	0.1343
ENSG00000086696	HSD17B2	hydroxysteroid 17-beta dehydrogenase 2	3294	0	0	0	0	0	0	0	0	0	0	0	0
ENSG00000086712	TXLNG	taxilin gamma	55787	193	185	185	212	108	47	9.53524	9.34486	9.20103	13.5824	5.31097	11.2501	0.413669	-0.699364	0.342864	0.22603	0.0163911	0.555255	0.040314	0.00227855	0.222725
ENSG00000086717	PPEF1	protein phosphatase with EF-hand domain 1	5475	2	0	2	1	2	1	0.125307	0	0.126143	0.0812474	0.124724	0.303548
ENSG00000086730	LAT2	linker for activation of T cells family member 2	7462	31	46	36	51	86	14	1.50124	2.27757	1.75502	3.20276	4.14536	3.28473	0.671635	1.2836	0.908152	0.188099	5.17092e-05	0.298726	0.0290254	1.42312e-06	0.0637138
ENSG00000086758	HUWE1	HECT, UBA and WWE domain containing E3 ubiquitin protein ligase 1	10075	4795	4478	3580	5205	3121	1046	60.7276	57.984	45.6426	85.4838	39.3429	64.182	0.520253	-0.35847	0.307772	0.0305752	0.128165	0.307467	0.0014154	0.0397131	0.0686424
ENSG00000086827	ZW10	zw10 kinetochore protein	9183	204	184	217	167	150	39	15.398	14.1997	16.4886	16.3462	11.2694	14.2621	-0.0339104	-0.329444	-0.0296802	0.999702	0.293529	1	0.908814	0.133251	0.98996
ENSG00000086848	ALG9	ALG9 alpha-1,2-mannosyltransferase	79796	37	31	37	49	33	8	1.00914	0.864444	1.01588	1.73305	0.895855	1.05712	0.721894	0.0127806	0.210946	0.138345	1	0.930974	0.0171244	0.980883	0.733366
ENSG00000086967	MYBPC2	myosin binding protein C2	4606	0	0	0	0	1	0	0	0	0	0	0.0589076	0
ENSG00000086991	NOX4	NADPH oxidase 4	50507	0	0	0	0	0	0	0	0	0	0	0	0
ENSG00000087008	ACOX3	acyl-CoA oxidase 3, pristanoyl	8310	169	162	133	160	104	30	9.67162	9.47882	7.66222	11.874	5.92409	8.31798	0.287315	-0.474351	-0.0249467	0.494393	0.141513	1	0.184217	0.0453749	1
ENSG00000087053	MTMR2	myotubularin related protein 2	8898	237	210	227	192	193	53	8.52491	7.72302	8.21973	8.95589	6.90994	9.23637	0.0120654	-0.12122	0.257397	1	0.765565	0.670419	0.957938	0.582739	0.336866
ENSG00000087074	PPP1R15A	protein phosphatase 1 regulatory subunit 15A	23645	497	489	473	477	570	93	35.6901	35.9027	34.1935	44.4197	40.742	32.3563	0.209682	0.325772	-0.0464058	0.570008	0.18556	0.993567	0.24609	0.067786	0.872043
ENSG00000087076	HSD17B14	hydroxysteroid 17-beta dehydrogenase 14	51171	18	14	24	6	13	3	3.56279	2.83316	4.7821	1.54005	2.56116	2.87689	-1.3829	-0.421185	-0.293873	0.160422	0.69019	1	0.0222898	0.489541	0.900611
ENSG00000087077	TRIP6	thyroid hormone receptor interactor 6	7205	2295	2426	2194	1968	2517	426	197.858	213.84	190.414	220.02	215.988	177.936	0.00857875	0.222684	-0.0966877	1	0.358683	0.862	0.946382	0.179845	0.612959
ENSG00000087085	ACHE	acetylcholinesterase (Yt blood group)	43	14	9	9	16	9	2	0.756361	0.49713	0.489479	1.12095	0.483971	0.523498	0.816391	-0.145143	-0.0724076	0.380523	0.964612	1	0.11119	0.889286	1
ENSG00000087086	FTL	ferritin light chain	2512	43763	44833	44071	42770	57457	10302	11058.9	11583.2	11211.1	14015.5	14451.8	12612.7	0.188578	0.473602	0.237434	0.569252	0.0222448	0.446219	0.245616	0.00337312	0.145252
ENSG00000087087	SRRT	serrate, RNA effector molecule	51593	4444	4530	3967	3419	3358	565	201.344	209.84	180.933	200.877	151.433	124.022	-0.0979532	-0.264779	-0.59265	0.84053	0.285196	0.0323122	0.578433	0.127738	0.00123896
ENSG00000087088	BAX	BCL2 associated X, apoptosis regulator	581	1140	1114	1199	974	943	167	96.9908	96.903	102.692	107.461	79.857	68.8377	-0.00362758	-0.191128	-0.4451	1	0.492088	0.210724	1	0.289829	0.0314583
ENSG00000087095	NLK	nemo like kinase	51701	71	48	67	61	56	17	3.27682	2.26497	3.11286	3.65082	2.57252	3.80126	0.216007	-0.0477135	0.474664	0.742023	1	0.596078	0.430492	0.946919	0.261192
ENSG00000087111	PIGS	phosphatidylinositol glycan anchor biosynthesis class S	94005	908	813	767	727	464	116	33.856	30.9932	28.7896	35.152	17.2204	20.9552	0.049352	-0.739182	-0.495828	0.941263	0.00143783	0.180982	0.774923	9.43184e-05	0.0233423
ENSG00000087116	ADAMTS2	ADAM metallopeptidase with thrombospondin type 1 motif 2	9509	49	56	48	32	31	5	1.23186	1.4394	1.21478	1.04323	0.775716	0.609004	-0.433864	-0.619886	-1.00623	0.546219	0.18753	0.442309	0.226442	0.0689616	0.142451
ENSG00000087128	TMPRSS11E	transmembrane serine protease 11E	28983	0	0	0	0	0	0	0	0	0	0	0	0
ENSG00000087152	ATXN7L3	ataxin 7 like 3	56970	1494	1586	1308	1507	961	234	62.0319	67.3277	54.6717	81.1416	39.7158	47.0722	0.280002	-0.509852	-0.304507	0.353797	0.0279889	0.414569	0.0962839	0.0046283	0.122931
ENSG00000087157	PGS1	phosphatidylglycerophosphate synthase 1	9489	390	421	352	374	325	78	16.971	18.7306	15.4197	21.1048	14.0767	16.4445	0.185015	-0.158329	0.0261019	0.641098	0.630707	1	0.316095	0.4238	0.902025
ENSG00000087191	PSMC5	proteasome 26S subunit, ATPase 5	5705	5833	6034	5737	4263	5526	932	300.035	317.33	297.067	284.355	282.922	232.263	-0.224245	0.0092569	-0.315177	0.507945	0.997078	0.327561	0.195729	0.941463	0.0771968
ENSG00000087206	UIMC1	ubiquitin interaction motif containing 1	51720	220	198	200	156	152	44	10.1578	9.34692	9.29602	9.34044	6.98547	9.84268	-0.162203	-0.340408	0.114165	0.774288	0.273317	0.900254	0.47109	0.119757	0.680332
ENSG00000087237	CETP	cholesteryl ester transfer protein	1071	0	0	0	0	0	0	0	0	0	0	0	0
ENSG00000087245	MMP2	matrix metallopeptidase 2	4313	0	1	1	2	0	0	0	0.0478186	0.0470826	0.121301	0	0
ENSG00000087250	MT3	metallothionein 3	4504	0	0	0	0	0	0	0	0	0	0	0	0
ENSG00000087253	LPCAT2	lysophosphatidylcholine acyltransferase 2	54947	79	60	61	74	35	18	2.36218	1.83427	1.83614	2.86935	1.04167	2.6076	0.389787	-0.828438	0.452545	0.423231	0.0427179	0.617883	0.138448	0.00829532	0.281155
ENSG00000087258	GNAO1	G protein subunit alpha o1	2775	0	0	0	2	0	0	0	0	0	0.0421536	0	0
ENSG00000087263	OGFOD1	2-oxoglutarate and iron dependent oxygenase domain containing 1	55239	608	491	560	488	591	95	23.1565	19.1195	21.4708	24.1021	22.4043	17.5298	0.0596787	0.195069	-0.198598	0.921257	0.473202	0.727066	0.734667	0.271783	0.399467
ENSG00000087266	SH3BP2	SH3 domain binding protein 2	6452	525	492	510	535	461	101	8.30242	7.95494	8.11906	10.9715	7.25641	7.73839	0.309962	-0.0455859	0.00737867	0.330322	0.931539	1	0.0841582	0.829798	0.960704
ENSG00000087269	NOP14	NOP14 nucleolar protein	8602	1576	1492	1580	1192	1409	311	97.4653	94.3386	98.3652	95.5952	86.7322	93.1834	-0.140383	-0.0399629	0.0237361	0.745583	0.934533	0.998387	0.43445	0.835369	0.88595
ENSG00000087274	ADD1	adducin 1	118	1996	1892	1753	1717	1224	310	33.214	32.1891	29.3652	37.0507	20.273	24.9923	0.107365	-0.52173	-0.259623	0.803717	0.0228166	0.489766	0.517921	0.00349337	0.175766
ENSG00000087299	L2HGDH	L-2-hydroxyglutarate dehydrogenase	79944	94	55	107	79	87	19	3.15389	1.88672	3.61403	3.43725	2.90545	3.08856	0.128824	0.127134	0.175387	0.868154	0.80354	0.891249	0.629506	0.635102	0.660115
ENSG00000087301	TXNDC16	thioredoxin domain containing 16	57544	8	9	12	6	3	3	0.372028	0.427912	0.561768	0.361828	0.138862	0.675913	-0.443214	-1.55388	0.643951	0.883996	0.168691	0.79699	0.661904	0.0589459	0.511628
ENSG00000087302	RTRAF	RNA transcription, translation and transport factor	51637	724	708	722	449	1270	165	19.2293	19.2258	19.3042	15.4645	33.5741	21.2321	-0.439643	0.919327	0.218502	0.148565	2.76043e-06	0.615805	0.0192727	4.24114e-08	0.27947
ENSG00000087303	NID2	nidogen 2	22795	0	0	0	0	0	0	0	0	0	0	0	0
ENSG00000087338	GMCL1	germ cell-less 1, spermatogenesis associated	64395	81	49	60	57	41	15	3.64435	2.25402	2.71755	3.32565	1.83609	3.26972	0.0889502	-0.525793	0.265061	0.953216	0.217925	0.820293	0.801096	0.0854232	0.548946
ENSG00000087365	SF3B2	splicing factor 3b subunit 2	10992	8033	8205	6881	6223	4719	1114	180.508	188.505	155.654	181.336	105.546	121.279	-0.0709092	-0.610886	-0.45023	0.897352	0.00506635	0.120026	0.688929	0.000493774	0.0113469
ENSG00000087448	KLHL42	kelch like family member 42	57542	289	233	289	295	223	55	8.37624	6.90453	8.43217	11.0876	6.43327	7.72322	0.365311	-0.178974	0.0447609	0.267825	0.607611	0.986955	0.0555915	0.400505	0.853015
ENSG00000087460	GNAS	GNAS complex locus	2778	10731	10310	9535	8187	7765	1646	166.978	164.023	149.359	165.2	120.264	124.089	-0.0777963	-0.295001	-0.289632	0.882344	0.220945	0.372361	0.658501	0.0873597	0.0986994
ENSG00000087470	DNM1L	dynamin 1 like	10059	328	256	302	275	256	71	9.91391	7.91112	9.18901	10.7788	7.7017	10.3971	0.13724	-0.106801	0.286151	0.773019	0.781596	0.582587	0.469988	0.604566	0.249616
ENSG00000087494	PTHLH	parathyroid hormone like hormone	5744	2	5	8	4	4	1	0.129281	0.330447	0.520577	0.335298	0.25736	0.313176
ENSG00000087495	PHACTR3	phosphatase and actin regulator 3	116154	0	0	0	0	0	0	0	0	0	0	0	0
ENSG00000087502	ERGIC2	ERGIC and golgi 2	51290	88	50	90	69	83	18	3.32456	1.93129	3.42282	3.38039	3.12108	3.29464	0.101094	0.226566	0.264695	0.907823	0.58175	0.820455	0.708187	0.373027	0.549327
ENSG00000087510	TFAP2C	transcription factor AP-2 gamma	7022	103	96	99	108	70	22	7.55428	7.1987	7.3094	10.2718	5.1101	7.81741	0.358534	-0.406913	0.165778	0.399644	0.281475	0.884754	0.122874	0.12556	0.651716
ENSG00000087586	AURKA	aurora kinase A	6790	1386	1361	1358	1014	1190	230	104.187	104.601	102.764	98.845	89.0376	83.765	-0.194827	-0.104792	-0.232639	0.604843	0.751565	0.573315	0.27827	0.563598	0.241088
ENSG00000087589	CASS4	Cas scaffold protein family member 4	57091	4	4	5	5	6	4	0.173684	0.177577	0.218555	0.281537	0.259314	0.84148	0.433437	0.553381	2.18517	0.836377	0.828866	0.198732	0.571328	0.669017	0.0281704
ENSG00000087842	PIR	pirin	8544	191	235	200	183	302	57	16.7354	21.0522	17.641	20.7931	26.3381	24.197	0.0460105	0.627576	0.465462	0.965113	0.0093234	0.342907	0.828037	0.00109053	0.083312
ENSG00000087884	AAMDC	adipogenesis associated Mth938 domain containing	28971	26	28	25	12	36	2	2.94525	3.2429	2.85088	1.76277	4.05908	1.09765	-0.889925	0.545904	-1.36488	0.293312	0.267355	0.554286	0.0671416	0.115908	0.221122
ENSG00000087903	RFX2	regulatory factor X2	5990	190	171	158	136	192	28	4.59855	4.23146	3.84959	4.26847	4.62534	3.28329	-0.108029	0.24836	-0.285404	0.877523	0.416695	0.732586	0.646629	0.225661	0.411724
ENSG00000087995	METTL2A	methyltransferase 2A, tRNA N3-cytidine	339175	573	548	577	434	490	91	32.8176	32.0892	33.2673	32.2335	27.9334	25.2509	-0.145302	-0.111083	-0.296471	0.751025	0.746931	0.539025	0.443494	0.558526	0.207796
ENSG00000088002	SULT2B1	sulfotransferase family 2B member 1	6820	51	38	34	22	60	4	3.97773	3.03023	2.66953	2.22512	4.65792	1.5115	-0.655695	0.646653	-1.00964	0.321511	0.0919561	0.56617	0.0794864	0.0248533	0.232689
ENSG00000088035	ALG6	ALG6 alpha-1,3-glucosyltransferase	29929	61	48	106	47	48	16	2.4469	1.96859	4.28039	2.44484	1.91648	3.1095	-0.370346	-0.480585	0.176469	0.547461	0.25326	0.908223	0.227651	0.106616	0.695177
ENSG00000088038	CNOT3	CCR4-NOT transcription complex subunit 3	4849	1358	1381	1034	1243	860	214	43.8201	45.5611	33.5881	52.0129	27.6215	33.4558	0.221153	-0.451049	-0.21441	0.503562	0.0573936	0.621017	0.192006	0.012533	0.284499
ENSG00000088053	GP6	glycoprotein VI platelet	51206	3	2	0	1	1	1	0.244285	0.166507	0	0.105595	0.0810497	0.394512
ENSG00000088179	PTPN4	protein tyrosine phosphatase non-receptor type 4	5775	33	20	29	33	21	7	0.547103	0.339009	0.483997	0.709471	0.346537	0.56226	0.509338	-0.280117	0.374982	0.438777	0.740381	0.808787	0.147959	0.551354	0.532384
ENSG00000088205	DDX18	DEAD-box helicase 18	8886	703	499	543	632	393	129	19.817	14.3817	15.4089	23.1028	11.0268	17.618	0.362158	-0.463904	0.172164	0.223254	0.0657627	0.735255	0.0394556	0.0152699	0.415869
ENSG00000088247	KHSRP	KH-type splicing regulatory protein	8570	6279	5796	5195	5898	3131	953	302.874	285.842	252.259	368.928	150.325	222.714	0.274122	-0.78031	-0.253011	0.349159	0.000264265	0.465575	0.0943238	1.10733e-05	0.155738
ENSG00000088256	GNA11	G protein subunit alpha 11	2767	1545	1525	1362	1517	1237	264	54.106	54.6026	48.0158	68.8919	43.1183	44.7924	0.276113	-0.159085	-0.143929	0.36196	0.583272	0.768772	0.100875	0.374198	0.465372
ENSG00000088280	ASAP3	ArfGAP with SH3 domain, ankyrin repeat and PH domain 3	55616	304	307	247	246	183	31	13.4143	13.8503	10.9719	14.0766	8.03752	6.62737	0.0206467	-0.546722	-0.864484	1	0.0454883	0.0731038	0.920232	0.00903082	0.0046235
ENSG00000088298	EDEM2	ER degradation enhancing alpha-mannosidase like protein 2	55741	359	335	323	285	385	71	41.9407	40.014	37.9869	43.1769	44.769	40.1868	-0.0118039	0.281134	0.0856134	1	0.282939	0.926046	0.990683	0.126343	0.723101
ENSG00000088305	DNMT3B	DNA methyltransferase 3 beta	1789	221	244	195	251	107	48	10.5059	11.8593	9.33181	15.4732	5.06291	11.0552	0.426846	-0.943103	0.142917	0.191726	0.000656136	0.868278	0.0299122	3.41874e-05	0.621715
ENSG00000088320	REM1	RRAD and GEM like GTPase 1	28954	0	0	0	0	0	0	0	0	0	0	0	0
ENSG00000088325	TPX2	TPX2 microtubule nucleation factor	22974	4047	3977	3408	2886	2761	677	247.087	248.256	209.463	228.496	167.787	200.258	-0.162806	-0.367537	-0.152118	0.67067	0.118159	0.728315	0.351541	0.0353292	0.403716
ENSG00000088340	FER1L4	fer-1 like family member 4 (pseudogene)	80307	24	12	29	9	51	4	0.550138	0.281234	0.669189	0.267528	1.16361	0.444226	-1.01935	1.32828	-0.0949563	0.324778	0.000874167	1	0.0811135	4.89347e-05	1
ENSG00000088356	PDRG1	p53 and DNA damage regulated 1	81572	447	462	571	326	728	75	50.2735	53.1251	64.6484	47.5461	81.4963	40.8674	-0.361618	0.656346	-0.378967	0.28602	0.00216748	0.411679	0.0633134	0.000160281	0.120984
ENSG00000088367	EPB41L1	erythrocyte membrane protein band 4.1 like 1	2036	754	764	670	625	563	102	17.1513	17.7683	15.3423	18.4362	12.7471	11.2411	0.0148437	-0.276681	-0.497782	1	0.295919	0.197528	0.926488	0.134636	0.0277093
ENSG00000088386	SLC15A1	solute carrier family 15 member 1	6564	25	15	20	22	28	2	1.30701	0.801785	1.05259	1.49152	1.45705	0.506587	0.374786	0.580957	-0.969117	0.669604	0.323945	0.724593	0.350465	0.154241	0.396614
ENSG00000088387	DOCK9	dedicator of cytokinesis 9	23348	166	154	111	170	62	38	2.46603	2.33904	1.65999	3.27496	0.916765	2.73501	0.481792	-1.11241	0.422831	0.165866	0.000366653	0.479967	0.0233564	1.67529e-05	0.168007
ENSG00000088448	ANKRD10	ankyrin repeat domain 10	55608	491	352	504	376	530	91	23.6839	17.3596	24.4733	23.5193	25.4462	21.2665	-0.015305	0.339006	0.0404136	1	0.166581	0.986955	0.967086	0.0579195	0.853054
ENSG00000088451	TGDS	TDP-glucose 4,6-dehydratase	23483	38	40	52	41	51	16	3.25315	3.50112	4.4814	4.55166	4.34576	6.63627	0.156941	0.330536	0.899953	0.888878	0.507881	0.288633	0.670642	0.302082	0.0599824
ENSG00000088538	DOCK3	dedicator of cytokinesis 3	1795	68	66	59	61	64	8	1.65033	1.6377	1.44147	1.91981	1.54603	0.940669	0.161183	0.0897233	-0.664661	0.832403	0.903769	0.618074	0.561274	0.78504	0.281829
ENSG00000088543	C3orf18	chromosome 3 open reading frame 18	51161	204	195	173	148	145	29	13.8411	13.527	11.8162	13.0217	9.7923	9.53286	-0.126919	-0.297192	-0.375599	0.846908	0.366436	0.610539	0.588536	0.186057	0.274723
ENSG00000088682	COQ9	coenzyme Q9	57017	842	745	673	631	572	147	42.9092	38.817	34.5258	41.6998	29.0142	36.2944	-0.0159008	-0.298331	-0.0151931	1	0.255245	1	0.949423	0.108002	0.96918
ENSG00000088726	TMEM40	transmembrane protein 40	55287	53	74	62	50	82	17	3.53817	5.05081	4.16663	4.32852	5.44869	5.4984	-0.0974341	0.474382	0.447542	0.956202	0.181072	0.651711	0.806033	0.0651713	0.313274
ENSG00000088727	KIF9	kinesin family member 9	64147	78	72	71	53	87	16	2.93468	2.76965	2.68915	2.58588	3.25807	2.91655	-0.236122	0.337071	0.137757	0.733468	0.366946	0.959436	0.421955	0.186439	0.79876
ENSG00000088756	ARHGAP28	Rho GTPase activating protein 28	79822	0	0	0	0	0	0	0	0	0	0	0	0
ENSG00000088766	CRLS1	cardiolipin synthase 1	54675	16	23	37	26	9	5	0.656161	0.964373	1.5275	1.38271	0.367374	0.993446	0.272629	-1.38577	-0.00206795	0.811575	0.043189	1	0.529936	0.00842141	1
ENSG00000088782	DEFB127	defensin beta 127	140850	0	0	0	0	0	0	0	0	0	0	0	0
ENSG00000088808	PPP1R13B	protein phosphatase 1 regulatory subunit 13B	23368	145	127	115	155	142	30	3.33382	2.98541	2.66172	4.62138	3.24966	3.34179	0.503795	0.236772	0.237255	0.153646	0.487975	0.77168	0.0204656	0.285288	0.468317
ENSG00000088812	ATRN	attractin	8455	277	278	278	312	201	49	6.95109	7.13254	7.02276	10.153	5.02047	5.95735	0.405395	-0.369457	-0.162505	0.199829	0.201311	0.841842	0.0323838	0.0761	0.583527
ENSG00000088826	SMOX	spermine oxidase	54498	477	539	474	467	596	101	35.6375	41.1722	35.6499	45.2451	44.3211	36.559	0.147017	0.358004	0.0405052	0.72844	0.138429	0.981278	0.416676	0.0441148	0.840806
ENSG00000088827	SIGLEC1	sialic acid binding Ig like lectin 1	6614	1	3	1	1	0	1	0.0279103	0.0856077	0.0280967	0.0361935	0	0.135223
ENSG00000088832	FKBP1A	FKBP prolyl isomerase 1A	2280	4258	3939	4434	3143	4136	811	363.675	343.97	381.236	348.111	351.612	335.593	-0.183826	0.0714011	-0.035668	0.615344	0.82105	0.988645	0.291463	0.657773	0.855967
ENSG00000088833	NSFL1C	NSFL1 cofactor	55968	1769	1963	1738	1213	1749	306	59.617	67.6378	58.9634	53.0114	58.6689	49.9629	-0.352099	0.0349624	-0.23655	0.24715	0.928805	0.5509	0.0477299	0.825315	0.218483
ENSG00000088836	SLC4A11	solute carrier family 4 member 11	83959	426	424	366	371	331	50	21.7094	22.0918	18.7763	24.5176	16.7897	12.345	0.110238	-0.195109	-0.678282	0.820797	0.524595	0.115617	0.54574	0.31714	0.0105577
ENSG00000088854	DNAAF9	dynein axonemal assembly factor 9	25943	61	46	44	32	41	7	1.57197	1.21199	1.14145	1.06937	1.05165	0.873968	-0.412405	-0.196414	-0.501885	0.577308	0.755667	0.743266	0.252828	0.569249	0.429114
ENSG00000088876	ZNF343	zinc finger protein 343	79175	170	147	158	125	171	36	8.05883	7.12471	7.53999	7.68421	8.06854	8.26818	-0.10195	0.209016	0.204447	0.903112	0.526265	0.800937	0.698589	0.318871	0.51799
ENSG00000088881	EBF4	EBF family member 4	57593	91	95	78	58	76	8	5.38854	5.75148	4.64959	4.45372	4.47939	2.29511	-0.36307	-0.11442	-1.11613	0.499209	0.843761	0.218056	0.188212	0.691435	0.0336787
ENSG00000088882	CPXM1	carboxypeptidase X, M14 family member 1	56265	2	0	1	0	1	0	0.18527	0	0.0932537	0	0.0922043	0
ENSG00000088888	MAVS	mitochondrial antiviral signaling protein	57506	3423	3118	2910	3200	2669	678	64.0052	59.6089	54.7762	77.5933	49.6744	61.4218	0.261737	-0.140879	0.125557	0.383399	0.628958	0.768218	0.113022	0.422246	0.463274
ENSG00000088899	LZTS3	leucine zipper tumor suppressor family member 3	9762	118	107	102	73	80	11	4.81407	4.46314	4.1891	3.86206	3.2486	2.17424	-0.339148	-0.347901	-0.965492	0.502127	0.343478	0.23227	0.190419	0.169192	0.0380291
ENSG00000088926	F11	coagulation factor XI	2160	0	0	0	0	0	0	0	0	0	0	0	0
ENSG00000088930	XRN2	5'-3' exoribonuclease 2	22803	727	566	498	581	347	151	46.9523	37.3736	32.3774	48.6591	22.3063	47.248	0.202772	-0.681462	0.361271	0.575096	0.0046311	0.336261	0.250822	0.000438671	0.0805723
ENSG00000088970	KIZ	kizuna centrosomal protein	55857	30	22	32	21	27	10	1.26811	0.950788	1.36168	1.15112	1.13599	2.04795	-0.17538	0.0452631	0.852305	0.925954	1	0.421062	0.742866	0.979809	0.127116
ENSG00000088986	DYNLL1	dynein light chain LC8-type 1	8655	3102	2835	3105	2007	2948	579	232.942	217.664	234.724	195.443	220.348	210.654	-0.348303	0.0655148	-0.0391919	0.24566	0.839289	0.983814	0.0471829	0.685056	0.844227
ENSG00000088992	TESC	tescalcin	54997	200	216	218	123	205	34	22.8558	25.2375	25.0791	18.2279	23.3182	18.8247	-0.543956	0.0517143	-0.296639	0.126994	0.905835	0.6766	0.0149899	0.789354	0.343226
ENSG00000089006	SNX5	sorting nexin 5	27131	1149	981	1238	762	1000	214	31.7988	27.7579	34.4907	27.3471	27.5465	28.6939	-0.320283	-0.0690385	-0.0499669	0.317872	0.857537	0.971898	0.0776795	0.712305	0.820952
ENSG00000089009	RPL6	ribosomal protein L6	6128	13355	13070	13660	8105	15567	2186	660.996	661.389	680.606	520.204	766.894	524.19	-0.483905	0.316835	-0.271894	0.0700362	0.153738	0.410227	0.00532874	0.0516259	0.11904
ENSG00000089012	SIRPG	signal regulatory protein gamma	55423	1	0	1	0	0	0	0.0981717	0	0.0988273	0	0	0
ENSG00000089022	MAPKAPK5	MAPK activated protein kinase 5	8550	192	197	187	163	193	52	3.07565	3.22647	3.01555	3.38601	3.07729	4.03574	0.00111922	0.103924	0.455045	1	0.789201	0.377304	1	0.616072	0.101043
ENSG00000089041	P2RX7	purinergic receptor P2X 7	5027	7	14	13	8	7	5	0.277805	0.568063	0.519369	0.411716	0.276513	0.961382	-0.262196	-0.590795	1.14809	0.93317	0.554393	0.479967	0.758644	0.346335	0.168489
ENSG00000089048	ESF1	ESF1 nucleolar pre-rRNA processing protein homolog	51575	69	21	61	66	37	31	4.72232	1.46944	4.20268	5.85755	2.52048	10.279	0.632138	-0.341361	1.64275	0.155793	0.51824	0.000998933	0.0211054	0.311511	9.54224e-06
ENSG00000089050	RBBP9	RB binding protein 9, serine hydrolase	10741	92	80	100	82	83	29	5.26914	4.68455	5.76557	6.0902	4.73157	8.04699	0.0932932	-0.0299062	0.695431	0.907109	0.999338	0.267685	0.707379	0.945132	0.0507747
ENSG00000089053	ANAPC5	anaphase promoting complex subunit 5	51433	1154	1225	1033	789	1045	216	20.7192	22.4869	18.6706	18.37	18.6749	18.789	-0.290636	-0.0261224	-0.0571272	0.377754	0.971759	0.956314	0.109478	0.900613	0.792271
ENSG00000089057	SLC23A2	solute carrier family 23 member 2	9962	222	184	125	241	124	30	6.49248	5.50177	3.68009	9.13988	3.60957	4.25073	0.68598	-0.412826	-0.216879	0.0165941	0.19152	0.815014	0.000539835	0.071081	0.540749
ENSG00000089060	SLC8B1	solute carrier family 8 member B1	80024	415	408	411	387	356	59	13.4961	13.5659	13.4553	16.3207	11.5236	9.29603	0.149543	-0.111691	-0.461221	0.733	0.754513	0.324365	0.421072	0.567336	0.0756937
ENSG00000089063	TMEM230	transmembrane protein 230	29058	773	729	803	591	572	192	55.7647	53.7692	58.3157	55.2883	41.0725	67.1066	-0.140775	-0.32874	0.339618	0.758055	0.200756	0.34379	0.45063	0.0758636	0.0840423
ENSG00000089091	DZANK1	double zinc ribbon and ankyrin repeat domains 1	55184	19	13	14	21	12	9	0.631805	0.441977	0.468649	0.905555	0.397179	1.44996	0.688131	-0.253153	1.5632	0.428292	0.912748	0.141687	0.140962	0.799179	0.0149448
ENSG00000089094	KDM2B	lysine demethylase 2B	84678	498	564	537	492	295	92	8.04066	9.31039	8.72825	10.3013	4.74089	7.19671	0.120071	-0.758466	-0.196261	0.797259	0.00167557	0.732438	0.507275	0.000115398	0.410582
ENSG00000089101	CFAP61	cilia and flagella associated protein 61	26074	1	1	3	3	1	0	0.0300767	0.0307508	0.0908325	0.117008	0.0299368	0
ENSG00000089116	LHX5	LIM homeobox 5	64211	36	38	47	40	59	7	2.58689	2.79181	3.39988	3.72736	4.2199	2.43701	0.224706	0.643598	-0.185898	0.795101	0.0935331	0.991031	0.505264	0.0254857	0.861409
ENSG00000089123	TASP1	taspase 1	55617	30	34	41	21	27	6	2.27926	2.64106	3.1358	2.06899	2.0418	2.20856	-0.497606	-0.276992	-0.20366	0.536397	0.665185	1	0.218129	0.463368	0.934569
ENSG00000089127	OAS1	2'-5'-oligoadenylate synthetase 1	4938	32	36	24	7	18	1	1.42547	1.63959	1.07624	0.404363	0.798096	0.21582	-1.87694	-0.66813	-2.56166	0.0154857	0.256281	0.192817	0.000488451	0.108573	0.0268052
ENSG00000089154	GCN1	GCN1 activator of EIF2AK4	10985	5049	4628	3762	5220	3513	811	115.04	107.811	86.2887	154.234	79.6707	89.5261	0.460371	-0.251814	-0.123357	0.0661851	0.313944	0.785906	0.00482238	0.147267	0.496476
ENSG00000089157	RPLP0	ribosomal protein lateral stalk subunit P0	6175	82834	84757	77318	64737	69502	14443	4571.68	4782.65	4295.74	4633.25	3818.03	3861.96	-0.0975084	-0.135903	-0.159197	0.837774	0.636338	0.688679	0.574225	0.430177	0.35538
ENSG00000089159	PXN	paxillin	5829	4140	3930	3203	5001	3609	787	122.147	118.55	95.1328	191.34	105.985	112.497	0.651397	0.039938	0.0861621	0.0039619	0.912748	0.859499	6.00768e-05	0.798791	0.608539
ENSG00000089163	SIRT4	sirtuin 4	23409	27	29	28	24	30	6	4.86312	5.34042	5.07691	5.60567	5.37833	5.23584	0.0152958	0.195606	0.117268	1	0.840179	0.996107	1	0.68724	0.881645
ENSG00000089169	RPH3A	rabphilin 3A	22895	3	0	0	4	1	0	0.0642568	0	0	0.111102	0.0213193	0
ENSG00000089177	KIF16B	kinesin family member 16B	55614	29	20	22	24	22	9	0.826697	0.582915	0.631337	0.887208	0.624233	1.24301	0.258206	-0.00684875	0.94243	0.821655	1	0.462259	0.546782	1	0.153625
ENSG00000089195	TRMT6	tRNA methyltransferase 6 non-catalytic subunit	51605	148	135	119	123	113	26	8.61088	8.03056	6.96984	9.28019	6.54394	7.32897	0.115283	-0.147656	-0.0241245	0.85674	0.741752	1	0.608171	0.552771	0.980962
ENSG00000089199	CHGB	chromogranin B	1114	0	0	0	1	0	0	0	0	0	0.0641831	0	0
ENSG00000089220	PEBP1	phosphatidylethanolamine binding protein 1	5037	4254	4274	4660	3129	4839	793	618.434	635.268	681.981	589.885	700.208	558.539	-0.253829	0.234306	-0.13161	0.434027	0.323542	0.77147	0.144524	0.153774	0.467778
ENSG00000089225	TBX5	T-box transcription factor 5	6910	4	9	4	0	1	1	0.201789	0.464201	0.203136	0	0.0502125	0.244411
ENSG00000089234	BRAP	BRCA1 associated protein	8315	175	191	193	155	209	48	8.2727	9.23143	9.18452	9.50182	9.83401	10.9935	-0.0291512	0.261042	0.381916	1	0.376002	0.4943	0.9122	0.1931	0.178321
ENSG00000089248	ERP29	endoplasmic reticulum protein 29	10961	3256	3546	3640	2572	4140	468	235.044	261.716	264.519	240.769	297.468	163.68	-0.200931	0.344931	-0.556688	0.574664	0.119706	0.0526645	0.250019	0.0359165	0.00265961
ENSG00000089250	NOS1	nitric oxide synthase 1	4842	0	2	0	0	0	0	0	0.0343223	0	0	0	0
ENSG00000089280	FUS	FUS RNA binding protein	2521	9148	9456	9443	7608	5550	1361	195.807	206.936	203.471	211.173	118.242	141.138	-0.0607601	-0.656638	-0.441071	0.919924	0.00239822	0.128669	0.7331	0.000183599	0.0126161
ENSG00000089289	IGBP1	immunoglobulin binding protein 1	3476	1012	938	961	645	829	155	119.497	113.241	114.233	98.7647	97.433	88.6731	-0.350736	-0.129557	-0.305234	0.269933	0.68165	0.446737	0.0562587	0.480889	0.145659
ENSG00000089327	FXYD5	FXYD domain containing ion transport regulator 5	53827	1381	1561	1296	1115	1769	299	101.625	117.445	96.0066	106.401	129.571	106.601	-0.105538	0.419451	0.0981465	0.832403	0.056262	0.845191	0.561166	0.0121694	0.589958
ENSG00000089335	ZNF302	zinc finger protein 302	55900	50	20	30	41	33	7	2.18701	0.894413	1.32097	2.32558	1.43672	1.48342	0.538708	0.086127	0.0923787	0.348118	0.918962	1	0.0938082	0.810645	0.934658
ENSG00000089351	GRAMD1A	GRAM domain containing 1A	57655	864	829	704	805	624	133	32.0039	31.3957	26.2514	38.6679	23.0064	23.8685	0.249375	-0.258844	-0.245566	0.443186	0.333211	0.593035	0.150363	0.161775	0.258018
ENSG00000089356	FXYD3	FXYD domain containing ion transport regulator 3	5349	7	8	7	1	4	3	0.46212	0.539974	0.465205	0.0856096	0.26284	0.959537	-2.51098	-0.759836	1.03541	0.204119	0.593986	0.6683	0.0337062	0.385436	0.334822
ENSG00000089472	HEPH	hephaestin	9843	1	0	0	0	1	0	0.0309435	0	0	0	0.0307996	0
ENSG00000089486	CDIP1	cell death inducing p53 target 1	29965	98	94	101	62	79	11	5.04677	4.94928	5.23599	4.14043	4.04939	2.74451	-0.417058	-0.208684	-0.8082	0.412162	0.634866	0.358341	0.131027	0.428673	0.0922063
ENSG00000089505	CMTM1	CKLF like MARVEL transmembrane domain containing 1	113540	5	0	0	4	1	0	0.751198	0	0	0.77931	0.149541	0
ENSG00000089558	KCNH4	potassium voltage-gated channel subfamily H member 4	23415	0	0	0	1	0	0	0	0	0	0.0753491	0	0
ENSG00000089597	GANAB	glucosidase II alpha subunit	23193	11292	10026	8426	10097	4609	1284	494.111	448.547	371.164	572.944	200.741	272.209	0.266494	-1.00574	-0.606169	0.36451	1.49721e-06	0.0218462	0.102509	2.01028e-08	0.000671293
ENSG00000089639	GMIP	GEM interacting protein	51291	330	329	284	284	253	44	19.4727	19.8489	16.8703	21.7319	14.8597	12.5791	0.0915142	-0.215967	-0.495939	0.871473	0.488666	0.326821	0.636112	0.285887	0.0766976
ENSG00000089682	RBM41	RNA binding motif protein 41	55285	30	32	40	50	26	6	1.08229	1.18031	1.45268	2.33914	0.933619	1.04871	0.791464	-0.289289	-0.161787	0.100559	0.657258	0.999695	0.0100693	0.454285	0.888925
ENSG00000089685	BIRC5	baculoviral IAP repeat containing 5	332	3792	3481	4421	2651	4945	738	218.774	205.333	256.766	198.337	283.968	206.285	-0.318722	0.439829	-0.061044	0.29418	0.0385863	0.935105	0.0677772	0.00718113	0.745585
ENSG00000089692	LAG3	lymphocyte activating 3	3902	16	13	14	3	19	2	1.15236	0.957279	1.01505	0.280192	1.36206	0.697883	-1.97876	0.500591	-0.493761	0.134778	0.478062	0.967485	0.0164309	0.276618	0.812125
ENSG00000089693	MLF2	myeloid leukemia factor 2	8079	7594	7578	7066	5882	5769	1131	442.065	451.021	414.075	444.024	334.265	318.979	-0.0961938	-0.265035	-0.372363	0.843761	0.281016	0.224857	0.582893	0.125192	0.0357792
ENSG00000089723	OTUB2	OTU deubiquitinase, ubiquitin aldehyde binding 2	78990	269	250	216	225	194	62	13.9607	13.2654	11.2849	15.1427	10.0215	15.5894	0.116022	-0.238511	0.358825	0.836377	0.456045	0.480461	0.568939	0.257725	0.169074
ENSG00000089737	DDX24	DEAD-box helicase 24	57062	4164	3794	3285	3284	2427	574	106.483	99.196	84.566	108.903	61.7754	71.1158	0.0489988	-0.528117	-0.364783	0.932903	0.0186974	0.252539	0.757689	0.00269158	0.0455988
ENSG00000089775	ZBTB25	zinc finger and BTB domain containing 25	7597	102	51	93	75	82	18	1.83582	0.938486	1.68502	1.75048	1.469	1.56959	0.112914	0.10081	0.156442	0.881624	0.855473	0.908318	0.65292	0.709008	0.695467
ENSG00000089818	NECAP1	NECAP endocytosis associated 1	25977	273	239	256	268	136	55	6.83979	6.12216	6.4567	8.70725	3.39152	6.67616	0.304921	-0.813882	0.12279	0.391994	0.00265611	0.884127	0.118323	0.000210482	0.650131
ENSG00000089820	ARHGAP4	Rho GTPase activating protein 4	393	834	831	821	861	1024	149	32.8968	33.5132	32.6003	44.041	40.2034	28.4746	0.292528	0.401787	-0.135574	0.341706	0.0766516	0.811115	0.0904609	0.0189825	0.535379
ENSG00000089847	ANKRD24	ankyrin repeat domain 24	170961	48	51	28	40	75	6	2.36139	2.56521	1.38667	2.55183	3.67251	1.43008	0.156081	0.920525	-0.475816	0.886977	0.00765259	0.787428	0.666092	0.000842449	0.498709
ENSG00000089876	DHX32	DEAH-box helicase 32 (putative)	55760	477	474	437	381	399	80	26.7486	27.1761	24.6691	27.706	22.2705	21.7348	-0.0424407	-0.11668	-0.191572	0.971467	0.744099	0.754198	0.841318	0.555365	0.443954
ENSG00000089902	RCOR1	REST corepressor 1	23186	301	305	297	312	235	60	10.6873	11.072	10.6157	14.3655	8.30508	10.3213	0.28898	-0.26053	0.0131058	0.410531	0.385347	1	0.13007	0.199752	0.965625
ENSG00000089916	GPATCH2L	G-patch domain containing 2 like	55668	185	122	173	217	180	69	1.85194	1.24865	1.74338	2.81697	1.79351	3.34649	0.680275	0.269963	1.12945	0.0205769	0.383685	0.00142617	0.000745192	0.198455	1.50524e-05
ENSG00000090006	LTBP4	latent transforming growth factor beta binding protein 4	8425	1017	1015	892	896	758	121	27.6076	28.1709	24.3761	31.5415	20.4811	15.9139	0.116373	-0.265734	-0.669436	0.789783	0.308938	0.0445613	0.496186	0.143449	0.00206286
ENSG00000090013	BLVRB	biliverdin reductase B	645	1244	1420	1226	1017	1666	250	169.749	198.108	168.41	179.959	226.276	165.277	-0.114941	0.456219	-0.0367369	0.809917	0.0356322	0.993159	0.527364	0.00645965	0.871174
ENSG00000090020	SLC9A1	solute carrier family 9 member A1	6548	370	320	256	297	257	53	13.1457	11.624	9.15611	13.6837	9.08844	9.12306	0.153878	-0.195531	-0.229806	0.726865	0.540882	0.736618	0.414851	0.333357	0.42091
ENSG00000090054	SPTLC1	serine palmitoyltransferase long chain base subunit 1	10558	284	204	305	232	205	77	9.59753	7.04852	10.376	10.167	6.89557	12.6071	0.0518959	-0.267297	0.562982	0.95075	0.390609	0.170992	0.796483	0.204542	0.0205492
ENSG00000090060	PAPOLA	poly(A) polymerase alpha	10914	662	467	715	610	522	195	10.7082	7.7233	11.6428	12.7954	8.40438	15.2819	0.229614	-0.135929	0.686716	0.50228	0.676101	0.0183301	0.190544	0.474445	0.000520394
ENSG00000090061	CCNK	cyclin K	8812	984	862	803	772	489	149	26.3479	23.5985	21.6449	26.8061	13.0327	19.3295	0.0459837	-0.753492	-0.224724	0.94596	0.00107384	0.632705	0.78647	6.42011e-05	0.295825
ENSG00000090097	PCBP4	poly(rC) binding protein 4	57060	741	708	668	692	612	119	43.6316	42.6229	39.5958	52.839	35.8682	33.948	0.209996	-0.108047	-0.227193	0.552416	0.755674	0.64856	0.232148	0.569535	0.309376
ENSG00000090104	RGS1	regulator of G protein signaling 1	5996	0	0	0	0	0	0	0	0	0	0	0	0
ENSG00000090238	YPEL3	yippee like 3	83719	13	23	20	11	12	1	0.899501	1.62709	1.39309	0.986999	0.826447	0.33523	-0.521953	-0.537227	-1.8514	0.714879	0.576589	0.543492	0.400609	0.367351	0.212677
ENSG00000090263	MRPS33	mitochondrial ribosomal protein S33	51650	562	619	600	453	764	122	23.5837	26.5579	25.3465	24.6513	31.9114	24.8039	-0.154211	0.458872	0.0556398	0.729491	0.0429735	0.954581	0.41752	0.00835356	0.787261
ENSG00000090266	NDUFB2	NADH:ubiquinone oxidoreductase subunit B2	4708	726	620	471	481	492	99	35.9328	31.3742	23.4675	30.8721	24.2379	23.7396	-0.0914134	-0.199626	-0.269362	0.875968	0.496817	0.57264	0.645126	0.293783	0.240172
ENSG00000090273	NUDC	nuclear distribution C, dynein complex regulator	10726	7714	8035	7962	5269	9495	1374	596.158	634.884	619.433	528.051	730.386	514.461	-0.348552	0.360217	-0.185171	0.23796	0.0978176	0.631763	0.0442061	0.0271367	0.294105
ENSG00000090316	MAEA	macrophage erythroblast attacher, E3 ubiquitin ligase	10296	1290	1399	1388	1042	1086	231	28.9105	32.0561	31.3145	30.2831	24.2254	25.082	-0.147322	-0.228503	-0.218169	0.726401	0.387839	0.609216	0.414072	0.201614	0.272255
ENSG00000090339	ICAM1	intercellular adhesion molecule 1	3383	9	10	10	5	6	0	0.57451	0.652651	0.642606	0.413895	0.381225	0
ENSG00000090372	STRN4	striatin 4	29888	1634	1629	1248	1530	1155	246	47.0924	48.0006	36.208	57.1816	33.1327	34.3493	0.263394	-0.283056	-0.270825	0.390694	0.262191	0.479967	0.117443	0.112425	0.168339
ENSG00000090376	IRAK3	interleukin 1 receptor associated kinase 3	11213	0	0	1	0	2	1	0	0	0.0228706	0	0.0452265	0.110071
ENSG00000090382	LYZ	lysozyme	4069	1	1	2	0	2	0	0.124774	0.12757	0.251214	0	0.248387	0
ENSG00000090402	SI	sucrase-isomaltase	6476	0	0	0	0	0	0	0	0	0	0	0	0
ENSG00000090432	MUL1	mitochondrial E3 ubiquitin protein ligase 1	79594	809	791	689	628	666	126	73.3368	73.3122	62.8757	73.8242	60.0929	55.3386	-0.0427185	-0.09881	-0.257478	0.968206	0.781371	0.573556	0.834662	0.604166	0.241375
ENSG00000090447	TFAP4	transcription factor AP-4	7023	328	312	321	248	212	57	9.1767	8.92471	9.04083	8.99768	5.9037	7.7263	-0.131192	-0.498146	-0.149946	0.811427	0.0639527	0.849252	0.529573	0.0145891	0.59601
ENSG00000090470	PDCD7	programmed cell death 7	10081	393	360	358	344	261	78	26.7387	25.0424	24.52	30.3509	17.6752	25.7114	0.132213	-0.406799	0.0938871	0.777995	0.133381	0.909069	0.475834	0.0419122	0.698403
ENSG00000090487	SPG21	SPG21 abhydrolase domain containing, maspardin	51324	749	629	653	561	497	122	41.3898	35.5377	36.3258	40.2013	27.3365	32.663	-0.0311869	-0.346733	-0.12975	0.989478	0.178567	0.832571	0.885939	0.0638761	0.568228
ENSG00000090512	FETUB	fetuin B	26998	1	0	1	0	0	0	0.108746	0	0.109472	0	0	0
ENSG00000090520	DNAJB11	DnaJ heat shock protein family (Hsp40) member B11	51726	291	353	359	236	401	72	11.176	13.8609	13.8796	11.7536	15.3289	13.397	-0.26771	0.356013	0.121935	0.50228	0.160866	0.869326	0.190518	0.0551158	0.623232
ENSG00000090530	P3H2	prolyl 3-hydroxylase 2	55214	3	7	14	2	9	2	0.118483	0.282656	0.55661	0.10243	0.353794	0.38269	-1.70873	0.262411	0.333865	0.304512	0.967619	1	0.0719801	0.893415	0.963728
ENSG00000090534	THPO	thrombopoietin	7066	2	4	1	0	1	0	0.162736	0.332768	0.0819115	0	0.0809898	0
ENSG00000090539	CHRD	chordin	8646	44	48	34	25	29	2	1.46291	1.63167	1.13798	1.07788	0.959704	0.322165	-0.508687	-0.435769	-2.03516	0.50351	0.445989	0.184038	0.191886	0.2499	0.0243937
ENSG00000090554	FLT3LG	fms related receptor tyrosine kinase 3 ligand	2323	3	0	0	3	3	0	0.232011	0	0	0.300867	0.230932	0
ENSG00000090565	RAB11FIP3	RAB11 family interacting protein 3	9727	283	294	226	237	207	33	9.90752	10.5233	7.96484	10.7595	7.21314	5.59727	0.0621808	-0.273762	-0.679101	0.932286	0.369521	0.185505	0.756255	0.188735	0.0246969
ENSG00000090581	GNPTG	N-acetylglucosamine-1-phosphate transferase subunit gamma	84572	359	395	385	243	522	55	19.3005	21.7119	20.8365	16.9413	27.9332	14.3259	-0.407549	0.554371	-0.448415	0.233337	0.0147931	0.358221	0.0424771	0.00200897	0.0921036
ENSG00000090612	ZNF268	zinc finger protein 268	10795	15	10	14	21	11	9	0.234233	0.159655	0.220077	0.425248	0.170972	0.6809	0.923859	-0.141624	1.79849	0.239239	1	0.0874748	0.0446637	1	0.00626406
ENSG00000090615	GOLGA3	golgin A3	2802	770	762	714	767	799	201	15.9659	16.1541	14.9036	20.6235	16.4901	20.1921	0.272551	0.190674	0.443015	0.389852	0.474011	0.183703	0.116834	0.272619	0.0241283
ENSG00000090621	PABPC4	poly(A) binding protein cytoplasmic 4	8761	4715	4463	3882	3722	2167	775	153.019	148.087	126.827	156.641	70.0001	121.857	0.0127545	-0.908446	-0.148518	1	1.8514e-05	0.732617	0.92529	4.20491e-07	0.411871
ENSG00000090659	CD209	CD209 molecule	30835	0	0	1	0	0	0	0	0	0.0501973	0	0	0
ENSG00000090661	CERS4	ceramide synthase 4	79603	387	366	329	232	307	80	20.9852	20.2913	17.9593	16.3139	16.5698	21.0173	-0.397788	-0.134648	0.168456	0.247232	0.705761	0.775662	0.0479191	0.506338	0.482237
ENSG00000090674	MCOLN1	mucolipin TRP cation channel 1	57192	269	292	195	210	135	32	14.9589	16.6018	10.9162	15.1437	7.47232	8.62145	-0.0254648	-0.803225	-0.636696	1	0.00310969	0.23813	0.935224	0.000262569	0.0401655
ENSG00000090686	USP48	ubiquitin specific peptidase 48	84196	301	310	258	275	248	54	6.97593	7.34554	6.01929	8.26483	5.72088	6.06336	0.16259	-0.127233	-0.0831638	0.71233	0.732555	0.956314	0.396482	0.542315	0.792547
ENSG00000090776	EFNB1	ephrin B1	1947	489	481	365	348	423	54	32.5853	32.7707	24.4848	30.0717	28.0562	17.4338	-0.116072	0.0245977	-0.701314	0.831766	0.963004	0.0926856	0.5604	0.885874	0.00697531
ENSG00000090857	PDPR	pyruvate dehydrogenase phosphatase regulatory subunit	55066	968	744	752	972	680	152	20.5159	16.1219	16.0444	26.7145	14.345	15.6079	0.484604	-0.171583	-0.089667	0.0645521	0.559188	0.902126	0.00464413	0.351267	0.68759
ENSG00000090861	AARS1	alanyl-tRNA synthetase 1	16	4128	4182	3367	4705	3974	895	201.996	209.225	165.858	298.558	193.556	212.183	0.511403	0.126952	0.219705	0.0347968	0.642957	0.52289	0.00173481	0.438224	0.196372
ENSG00000090863	GLG1	golgi glycoprotein 1	2734	4947	4792	4281	3793	3417	712	77.1625	76.4201	67.2202	76.7208	53.0499	53.8057	-0.0628697	-0.354328	-0.373716	0.916095	0.133114	0.233147	0.726022	0.0417838	0.0383931
ENSG00000090889	KIF4A	kinesin family member 4A	24137	749	770	724	603	641	170	36.0498	37.8912	35.0792	37.636	30.7082	39.6418	-0.0731738	-0.125857	0.202682	0.907017	0.698438	0.648883	0.706963	0.498378	0.309832
ENSG00000090905	TNRC6A	trinucleotide repeat containing adaptor 6A	27327	396	280	297	327	303	79	6.72116	4.85885	5.07453	7.19718	5.11879	6.49621	0.253964	0.00322425	0.307088	0.485414	1	0.529117	0.178374	0.971876	0.200831
ENSG00000090924	PLEKHG2	pleckstrin homology and RhoGEF domain containing G2	64857	224	177	147	213	117	30	5.40836	4.36936	3.57294	6.66904	2.81176	3.50932	0.462469	-0.541994	-0.26229	0.157401	0.0697661	0.763412	0.021544	0.0167029	0.454885
ENSG00000090932	DLL3	delta like canonical Notch ligand 3	10683	0	1	2	0	0	0	0	0.0859565	0.169267	0	0	0
ENSG00000090971	NAT14	N-acetyltransferase 14 (putative)	57106	731	746	828	501	931	152	81.3006	84.8285	92.7037	72.257	103.063	81.9038	-0.380369	0.372615	0.00134879	0.230258	0.106612	1	0.041668	0.0305434	0.988683
ENSG00000090975	PITPNM2	phosphatidylinositol transfer protein membrane associated 2	57605	166	161	174	215	178	38	3.98829	3.95486	4.20842	6.69859	4.25672	4.4233	0.60176	0.18869	0.20423	0.0469336	0.580949	0.78044	0.00279031	0.371496	0.488075
ENSG00000090989	EXOC1	exocyst complex component 1	55763	64	56	65	61	42	13	2.62464	2.34804	2.68345	3.24404	1.71441	2.58296	0.222355	-0.455386	0.09479	0.725269	0.292647	0.991417	0.413069	0.132639	0.862627
ENSG00000091009	RBM27	RNA binding motif protein 27	54439	46	30	58	49	32	10	1.5193	1.01306	1.92844	2.09869	1.05199	1.60019	0.371642	-0.381729	0.181747	0.537828	0.492088	0.960368	0.219699	0.289813	0.800236
ENSG00000091010	POU4F3	POU class 4 homeobox 3	5459	1	1	0	0	1	0	0.0854761	0.0873919	0	0	0.0850786	0
ENSG00000091039	OSBPL8	oxysterol binding protein like 8	114882	82	44	73	109	23	39	1.9622	1.07648	1.7585	3.38237	0.547812	4.52144	0.956347	-1.4231	1.57521	0.00413936	0.000795658	0.000363004	6.41504e-05	4.32643e-05	2.67064e-06
ENSG00000091073	DTX2	deltex E3 ubiquitin ligase 2	113878	442	443	335	363	382	72	19.2949	19.7719	14.7216	20.549	16.5981	15.2277	0.0744217	0.00718705	-0.156861	0.893168	1	0.812163	0.678796	0.958857	0.536411
ENSG00000091106	NLRC4	NLR family CARD domain containing 4	58484	0	0	0	0	0	0	0	0	0	0	0	0
ENSG00000091127	PUS7	pseudouridine synthase 7	54517	163	135	157	125	146	41	8.09304	6.85306	7.84719	8.04823	7.21527	9.86262	-0.0397351	0.0433761	0.454127	1	0.931906	0.421093	0.917854	0.831688	0.128073
ENSG00000091128	LAMB4	laminin subunit beta 4	22798	0	0	0	0	0	0	0	0	0	0	0	0
ENSG00000091129	NRCAM	neuronal cell adhesion molecule	4897	0	0	0	0	0	0	0	0	0	0	0	0
ENSG00000091136	LAMB1	laminin subunit beta 1	3912	277	273	234	217	193	59	7.55302	7.6108	6.42313	7.67302	5.2381	7.7943	-0.0300271	-0.339809	0.193472	1	0.246786	0.758025	0.921964	0.102671	0.448536
ENSG00000091137	SLC26A4	solute carrier family 26 member 4	5172	1	0	2	4	0	0	0.0392547	0	0.0790336	0.203619	0	0
ENSG00000091138	SLC26A3	solute carrier family 26 member 3	1811	0	7	2	0	0	0	0	0.465772	0.131029	0	0	0
ENSG00000091140	DLD	dihydrolipoamide dehydrogenase	1738	449	372	483	408	282	134	19.3699	16.4078	20.9758	22.8248	12.1089	28.0072	0.147611	-0.525894	0.643662	0.733468	0.0406455	0.0508893	0.421931	0.00772183	0.00247085
ENSG00000091157	WDR7	WD repeat domain 7	23335	90	86	81	100	71	19	1.26221	1.23314	1.14357	1.81867	0.991111	1.291	0.46086	-0.173237	0.167771	0.271896	0.736928	0.901666	0.057267	0.5477	0.682543
ENSG00000091164	TXNL1	thioredoxin like 1	9352	524	517	539	382	425	123	10.2092	10.2985	10.5715	9.65135	8.24182	11.6104	-0.225922	-0.212896	0.241568	0.563443	0.463561	0.59581	0.240658	0.263923	0.260254
ENSG00000091181	IL5RA	interleukin 5 receptor subunit alpha	3568	1	0	0	0	1	0	0.0333486	0	0	0	0.0331935	0
ENSG00000091262	ABCC6	ATP binding cassette subfamily C member 6	368	9	17	13	16	13	2	0.261713	0.505428	0.380555	0.60335	0.376272	0.281772	0.5321	0.0952192	-0.356072	0.63535	0.947285	1	0.311364	0.855998	1
ENSG00000091317	CMTM6	CKLF like MARVEL transmembrane domain containing 6	54918	322	255	296	340	177	88	18.375	14.8778	17.0041	25.1604	10.0536	24.3298	0.464408	-0.617722	0.616887	0.120597	0.02253	0.108169	0.0136639	0.00343594	0.00924895
ENSG00000091409	ITGA6	integrin subunit alpha 6	3655	448	356	455	530	323	125	14.6953	11.9392	15.0245	22.5445	10.5458	19.8652	0.576293	-0.278784	0.594725	0.0280536	0.324643	0.0855787	0.00123683	0.155117	0.00604825
ENSG00000091428	RAPGEF4	Rap guanine nucleotide exchange factor 4	11069	0	0	0	0	0	0	0	0	0	0	0	0
ENSG00000091436	MAP3K20	mitogen-activated protein kinase kinase kinase 20	51776	201	166	201	199	166	57	3.20489	2.70615	3.22629	4.11468	2.63451	4.40328	0.310812	-0.0913765	0.60939	0.411026	0.854216	0.180772	0.130337	0.706997	0.0232576
ENSG00000091482	SMPX	small muscle protein X-linked	23676	4	0	3	0	2	0	0.664958	0	0.502048	0	0.330933	0
ENSG00000091483	FH	fumarate hydratase	2271	750	795	926	481	869	124	77.0662	83.5211	95.7864	64.0934	88.8787	61.7317	-0.540253	0.17208	-0.393436	0.0597922	0.526265	0.311009	0.00400718	0.318923	0.0699925
ENSG00000091490	SEL1L3	SEL1L family member 3	23231	469	451	391	379	329	105	13.7949	13.5628	11.5775	14.4561	9.63203	14.963	0.0330339	-0.311824	0.283674	0.97517	0.254506	0.534559	0.84847	0.107532	0.205146
ENSG00000091513	TF	transferrin	7018	0	0	0	2	4	1	0	0	0	0.0219235	0.033655	0.0409542
ENSG00000091527	CDV3	CDV3 homolog	55573	1509	1276	1479	1277	1192	346	76.0551	65.7531	75.0408	83.4633	59.7985	84.4888	0.084884	-0.155327	0.303478	0.85794	0.595579	0.367576	0.61076	0.386709	0.095884
ENSG00000091536	MYO15A	myosin XVA	51168	6	7	6	5	18	2	0.0660303	0.078762	0.0664712	0.0713556	0.19717	0.106637	-0.100827	1.585	0.664545	1	0.0184503	0.833044	1	0.00263135	0.571328
ENSG00000091542	ALKBH5	alkB homolog 5, RNA demethylase	54890	1148	1088	1138	995	1138	269	70.1683	67.9915	70.0215	78.8656	69.2336	79.6591	0.0611802	0.114048	0.276593	0.91012	0.700369	0.437904	0.714102	0.500083	0.139386
ENSG00000091583	APOH	apolipoprotein H	350	1	0	0	0	1	0	0.165241	0	0	0	0.164472	0
ENSG00000091592	NLRP1	NLR family pyrin domain containing 1	22861	29	28	13	28	31	2	0.54639	0.539373	0.246569	0.684114	0.581356	0.182566	0.499491	0.505503	-1.19052	0.531078	0.390262	0.616492	0.214081	0.204177	0.280119
ENSG00000091622	PITPNM3	PITPNM family member 3	83394	82	91	71	87	70	7	1.69134	1.91904	1.47423	2.32703	1.43711	0.699518	0.334057	-0.119791	-1.19495	0.486623	0.855599	0.192475	0.179144	0.709764	0.0265485
ENSG00000091640	SPAG7	sperm associated antigen 7	9552	903	932	889	780	1201	161	71.5963	75.5518	70.9569	80.1979	94.7809	61.8461	0.0176794	0.499454	-0.156172	0.999592	0.0215856	0.766735	0.907696	0.00323712	0.45917
ENSG00000091651	ORC6	origin recognition complex subunit 6	23594	267	254	302	186	343	65	13.6382	13.265	15.529	12.3204	17.4387	16.0858	-0.323011	0.418697	0.262421	0.400068	0.0954815	0.646436	0.123499	0.0262144	0.306981
ENSG00000091656	ZFHX4	zinc finger homeobox 4	79776	104	75	103	109	73	15	1.4441	1.06476	1.43977	1.96272	1.00894	1.00911	0.452833	-0.265453	-0.304826	0.255141	0.533308	0.820118	0.050749	0.325432	0.548689
ENSG00000091664	SLC17A6	solute carrier family 17 member 6	57084	0	0	0	0	0	0	0	0	0	0	0	0
ENSG00000091704	CPA1	carboxypeptidase A1	1357	0	0	0	0	0	0	0	0	0	0	0	0
ENSG00000091732	ZC3HC1	zinc finger C3HC-type containing 1	51530	410	444	393	261	383	71	29.9706	33.1834	28.9197	24.741	27.8667	25.1451	-0.434627	-0.0223427	-0.210328	0.184541	0.992538	0.735255	0.028244	0.934391	0.41461
ENSG00000091831	ESR1	estrogen receptor 1	2099	0	0	0	0	0	0	0	0	0	0	0	0
ENSG00000091844	RGS17	regulator of G protein signaling 17	26575	11	4	7	5	9	1	0.305233	0.113482	0.195536	0.179918	0.248575	0.134438	-0.307175	0.387993	-0.519253	1	0.822983	1	0.947457	0.661046	0.935775
ENSG00000091879	ANGPT2	angiopoietin 2	285	1	1	4	3	0	0	0.0324872	0.0332154	0.130817	0.126386	0	0
ENSG00000091947	TMEM101	transmembrane protein 101	84336	854	791	891	576	979	137	62.0555	58.766	65.1765	54.2764	70.8078	48.2311	-0.315437	0.308848	-0.284795	0.337763	0.193635	0.505435	0.0883555	0.0722055	0.183924
ENSG00000091972	CD200	CD200 molecule	4345	0	0	0	0	0	0	0	0	0	0	0	0
ENSG00000091986	CCDC80	coiled-coil domain containing 80	151887	2	4	4	3	5	0	0.0336778	0.0688652	0.0678053	0.0655089	0.0838028	0
ENSG00000092009	CMA1	chymase 1	1215	0	0	0	0	0	0	0	0	0	0	0	0
ENSG00000092010	PSME1	proteasome activator subunit 1	5720	2210	2505	2427	1407	2592	360	273.887	317.405	302.788	226.12	319.735	216.155	-0.523586	0.216953	-0.387614	0.0522346	0.372986	0.236325	0.00323806	0.191053	0.0397133
ENSG00000092020	PPP2R3C	protein phosphatase 2 regulatory subunit B''gamma	55012	59	46	51	39	70	12	3.36163	2.67967	2.92522	2.88156	3.96982	3.31255	-0.175271	0.526207	0.225726	0.862447	0.162613	0.926046	0.620536	0.0558446	0.723497
ENSG00000092036	HAUS4	HAUS augmin like complex subunit 4	54930	141	132	116	121	100	18	12.223	11.6993	10.123	13.6022	8.62849	7.5599	0.138745	-0.27669	-0.506797	0.813925	0.446709	0.523137	0.533537	0.25039	0.196561
ENSG00000092051	JPH4	junctophilin 4	84502	0	0	0	0	0	0	0	0	0	0	0	0
ENSG00000092054	MYH7	myosin heavy chain 7	4625	0	0	0	0	0	0	0	0	0	0	0	0
ENSG00000092067	CEBPE	CCAAT enhancer binding protein epsilon	1053	0	0	0	0	0	0	0	0	0	0	0	0
ENSG00000092068	SLC7A8	solute carrier family 7 member 8	23428	116	123	113	81	59	13	4.26168	4.62013	4.17918	3.85899	2.1575	2.31393	-0.296986	-0.894076	-0.832729	0.565621	0.00758659	0.276617	0.24275	0.00083113	0.054806
ENSG00000092094	OSGEP	O-sialoglycoprotein endopeptidase	55644	260	277	234	223	292	56	11.3747	12.3901	10.3056	12.6514	12.7153	11.8697	0.0323925	0.280349	0.141313	0.984506	0.307258	0.850683	0.875533	0.142217	0.59741
ENSG00000092096	SLC22A17	solute carrier family 22 member 17	51310	79	86	68	57	60	9	4.06451	4.52383	3.52193	3.80296	3.07261	2.24341	-0.208435	-0.275172	-0.767204	0.786943	0.536692	0.429885	0.491617	0.329185	0.134029
ENSG00000092098	RNF31	ring finger protein 31	55072	5	4	4	4	8	2	0.217663	0.178033	0.175293	0.225809	0.346641	0.421822	0.11949	0.961627	1.1964	0.975672	0.472737	0.735255	0.852197	0.271295	0.41822
ENSG00000092108	SCFD1	sec1 family domain containing 1	23256	26	23	19	29	14	5	0.892765	0.807455	0.656762	1.2913	0.478484	0.831798	0.591374	-0.59321	0.15959	0.418071	0.435619	1	0.13447	0.240407	0.921324
ENSG00000092140	G2E3	G2/M-phase specific E3 ubiquitin protein ligase	55632	50	23	49	52	29	24	1.18093	0.555402	1.16504	1.59266	0.681752	2.7463	0.593703	-0.386669	1.57862	0.245387	0.524097	0.00769597	0.0470448	0.316489	0.00014189
ENSG00000092148	HECTD1	HECT domain E3 ubiquitin protein ligase 1	25831	784	696	606	802	399	233	13.7421	12.473	10.693	18.2296	6.96121	19.7868	0.445662	-0.702173	0.764859	0.100734	0.00286727	0.00470272	0.0101407	0.00023519	6.84832e-05
ENSG00000092199	HNRNPC	heterogeneous nuclear ribonucleoprotein C	3183	10617	10316	10695	7314	8348	1607	319.717	317.616	324.217	285.618	250.22	234.457	-0.290026	-0.240116	-0.373783	0.345921	0.336142	0.218056	0.0928694	0.163684	0.0334759
ENSG00000092200	RPGRIP1	RPGR interacting protein 1	57096	0	0	0	0	0	0	0	0	0	0	0	0
ENSG00000092201	SUPT16H	SPT16 homolog, facilitates chromatin remodeling subunit	11198	2207	1992	1959	2112	1876	547	70.4004	64.9664	62.9068	87.364	59.5636	84.5365	0.280173	-0.0316177	0.433695	0.345624	0.954953	0.132005	0.0926282	0.871366	0.0132088
ENSG00000092203	TOX4	TOX high mobility group box family member 4	9878	856	871	785	788	628	133	26.5698	27.6413	24.5287	31.7181	19.4021	20.0009	0.149748	-0.318465	-0.314402	0.704397	0.21506	0.446702	0.38763	0.0839123	0.145589
ENSG00000092208	GEMIN2	gem nuclear organelle associated protein 2	8487	84	90	91	89	89	27	6.70602	7.34606	7.31336	9.21385	7.07214	10.4432	0.247618	0.106945	0.628736	0.648108	0.822162	0.348776	0.324808	0.6596	0.0873688
ENSG00000092295	TGM1	transglutaminase 1	7051	21	13	25	20	24	2	1.23752	0.783252	1.48307	1.52837	1.40773	0.571012	0.261494	0.383076	-0.945656	0.861249	0.592224	0.724593	0.617545	0.383067	0.396614
ENSG00000092330	TINF2	TERF1 interacting nuclear factor 2	26277	542	512	468	366	440	93	43.9877	42.4843	38.2357	38.5194	35.5435	36.5678	-0.232467	-0.107702	-0.106507	0.550965	0.764973	0.894739	0.229992	0.581886	0.670785
ENSG00000092345	DAZL	deleted in azoospermia like	1618	0	0	0	0	0	0	0	0	0	0	0	0
ENSG00000092377	TBL1Y	transducin beta like 1 Y-linked	90665	0	0	0	0	0	0	0	0	0	0	0	0
ENSG00000092421	SEMA6A	semaphorin 6A	57556	48	42	39	40	40	14	0.964298	0.862672	0.788724	1.04207	0.799844	1.36264	0.13408	-0.00637259	0.720364	0.914667	1	0.444058	0.722446	1	0.14354
ENSG00000092439	TRPM7	transient receptor potential cation channel subfamily M member 7	54822	93	58	88	96	61	26	1.65342	1.05428	1.57498	2.21329	1.07946	2.23954	0.508912	-0.284968	0.726499	0.206516	0.517319	0.258676	0.0342676	0.310564	0.0475806
ENSG00000092445	TYRO3	TYRO3 protein tyrosine kinase	7301	980	915	796	733	606	123	20.0278	19.1185	16.3761	19.4257	12.3269	12.1785	-0.0522902	-0.467574	-0.524811	0.948706	0.053734	0.142975	0.791792	0.0113785	0.0151403
ENSG00000092470	WDR76	WD repeat domain 76	79968	319	274	286	255	284	73	17.3192	15.2095	15.6313	17.9533	15.3473	19.2019	0.0389537	0.053483	0.336813	0.973827	0.894506	0.486262	0.84587	0.770213	0.173846
ENSG00000092529	CAPN3	calpain 3	825	0	2	1	1	1	0	0	0.0901038	0.0443585	0.0571416	0.0438593	0
ENSG00000092531	SNAP23	synaptosome associated protein 23	8773	142	84	156	116	66	30	5.3408	3.23016	5.90653	5.65772	2.4708	5.46667	0.106219	-0.84697	0.257474	0.873449	0.00871983	0.768228	0.641113	0.00100129	0.464748
ENSG00000092607	TBX15	T-box transcription factor 15	6913	0	0	1	0	0	0	0	0	0.0510061	0	0	0
ENSG00000092621	PHGDH	phosphoglycerate dehydrogenase	26227	1250	1266	1075	1568	1941	361	29.8499	30.9096	25.8423	48.5562	46.1353	41.7661	0.62712	0.794126	0.610787	0.00816538	5.46383e-05	0.0237979	0.000172828	1.51877e-06	0.000771802
ENSG00000092758	COL9A3	collagen type IX alpha 3 chain	1299	321	349	325	209	336	35	14.5946	16.2233	14.8751	12.3225	15.2055	7.70973	-0.429588	0.114274	-0.904736	0.209527	0.734431	0.0437595	0.0350751	0.544911	0.0020125
ENSG00000092820	EZR	ezrin	7430	16193	15296	14943	14001	16743	3204	1080.68	1043.7	1003.92	1211.7	1112.19	1035.97	0.0936599	0.210829	0.0686073	0.832159	0.379494	0.894663	0.56072	0.195451	0.669409
ENSG00000092841	MYL6	myosin light chain 6	4637	8114	8776	8928	6224	11877	1847	387.481	428.488	429.2	385.435	564.544	427.333	-0.231849	0.559538	0.118018	0.486721	0.0054191	0.7738	0.179447	0.000540824	0.47413
ENSG00000092847	AGO1	argonaute RISC component 1	26523	882	834	750	776	682	168	13.9762	13.5118	11.9639	15.9458	10.7567	12.8977	0.155525	-0.171567	0.0504747	0.687276	0.558729	0.956314	0.367595	0.350764	0.792159
ENSG00000092850	TEKT2	tektin 2	27285	0	0	2	0	0	0	0	0	0.226208	0	0	0
ENSG00000092853	CLSPN	claspin	63967	294	225	224	312	223	97	6.74692	5.27919	5.17483	9.28493	5.09376	10.7848	0.574025	-0.0510607	0.990862	0.0448647	0.937191	0.00198698	0.00261636	0.839296	2.30951e-05
ENSG00000092871	RFFL	ring finger and FYVE like domain containing E3 ubiquitin protein ligase	117584	346	292	314	333	158	73	8.94677	7.71969	8.17354	11.1661	4.06652	9.14529	0.308935	-0.906902	0.221925	0.360589	0.000457276	0.699795	0.0999373	2.15656e-05	0.366493
ENSG00000092929	UNC13D	unc-13 homolog D	201294	228	256	205	332	251	59	6.47356	7.43147	5.85939	12.224	7.09345	8.11604	0.767941	0.223808	0.378186	0.00333977	0.449064	0.454068	4.86353e-05	0.25222	0.149506
ENSG00000092931	MFSD11	major facilitator superfamily domain containing 11	79157	120	108	150	93	139	37	4.00973	3.68965	5.04564	4.0298	4.62301	5.98991	-0.200198	0.238282	0.57182	0.750471	0.487384	0.323241	0.44141	0.284844	0.0750558
ENSG00000092964	DPYSL2	dihydropyrimidinase like 2	1808	590	550	630	455	351	133	17.7987	16.9639	19.1323	17.7998	10.5395	19.439	-0.13702	-0.652129	0.190991	0.774392	0.00690261	0.695221	0.471205	0.000738676	0.36275
ENSG00000092969	TGFB2	transforming growth factor beta 2	7042	3	2	0	1	1	0	0.109141	0.0743915	0	0.0471772	0.0362111	0
ENSG00000092978	GPATCH2	G-patch domain containing 2	55105	57	24	38	53	30	10	1.41904	0.610884	0.952346	1.71105	0.743391	1.20616	0.658178	-0.300901	0.355209	0.18248	0.673939	0.819661	0.0275292	0.472362	0.547659
ENSG00000093000	NUP50	nucleoporin 50	10762	617	481	543	518	568	142	16.4889	13.1425	14.6082	17.9515	15.1088	18.3856	0.162087	0.15417	0.397494	0.680828	0.59484	0.280511	0.36113	0.38603	0.056046
ENSG00000093009	CDC45	cell division cycle 45	8318	366	378	303	252	293	58	27.0507	28.5638	22.544	24.1526	21.5546	20.7687	-0.232035	-0.15545	-0.248775	0.578919	0.64108	0.682504	0.254338	0.435278	0.349419
ENSG00000093010	COMT	catechol-O-methyltransferase	1312	949	1272	958	728	1234	195	40.2071	55.0998	40.8594	39.9976	52.0388	40.0272	-0.308186	0.312212	-0.106145	0.342422	0.183236	0.859491	0.0908681	0.0662317	0.608476
ENSG00000093072	ADA2	adenosine deaminase 2	51816	0	0	1	0	2	0	0	0	0.0254562	0	0.0503395	0
ENSG00000093100				1	1	0	2	2	1	0.0508551	0.051995	0	0.131896	0.101237	0.246388
ENSG00000093134	VNN3P	vanin 3, pseudogene		0	0	0	0	0	0	0	0	0	0	0	0
ENSG00000093144	ECHDC1	ethylmalonyl-CoA decarboxylase 1	55862	266	232	296	226	373	81	10.3148	9.19802	11.5548	11.3646	14.3967	15.2177	0.0104484	0.592214	0.632353	1	0.0113372	0.108699	0.953822	0.00141317	0.009349
[truncated: 58,625 more rows]
